# Supplementary material for: Structure–activity relationship studies of cyclopropenimines as enantioselective Brønsted base catalysts
Source: PubMed Central journal article supplement (PMC4618405; doi:10.1039/c4sc02402h), 2014-12-19
Supplement: NIHMS730451-supplement-SI.pdf [file NIHMS730451-supplement-SI.pdf]

## Supporting Information

### **Structure-Activity Relationship Studies of Cyclopropenimines as Enantioselective Brønsted Base Catalysts**

Jeffrey S. Bandar, Alexandre P. Barthelme, Alon Y. Mazori, and Tristan H. Lambert\*

Department of Chemistry, Columbia University, New York, NY 10027

**General information.** All reactions were performed open to the atmosphere, unless otherwise noted. Methylene chloride, diethyl ether, tetrahydrofuran and toluene were dried using a J.C. Meyer solvent purification system. All other solvents and commercial reagents were used as provided, unless otherwise noted. Flash column chromatography was performed employing 40-63  $\mu\text{m}$  silica gel (SiliaFlash P60 from Silicycle). Thin-layer chromatography (TLC) was performed on silica gel 60 F<sub>254</sub> plates (EMD). Organic solutions were concentrated using a Buchi rotary evaporator.

<sup>1</sup>H and <sup>13</sup>C NMR spectra were recorded in CDCl<sub>3</sub> (except where noted) on Bruker DRX-300, DRX-400 or DRX-500 spectrometers as noted. Data for <sup>1</sup>H NMR are reported as follows: chemical shift ( $\delta$  ppm), multiplicity (s = singlet, br s = broad singlet, d = doublet, t = triplet, q = quartet, dd = doublet of doublets, td = triplet of doublets, m = multiplet), coupling constant (Hz), integration, and assignment. Data for <sup>13</sup>C and <sup>19</sup>F NMR are reported in terms of chemical shift. Infrared spectra were recorded on a Nicolet Avatar 370DTGS FT-IR. Optical rotations were measured using a Jasco DIP-1000 digital polarimeter. High-resolution mass spectra were obtained from the Columbia University Mass Spectrometry Facility on a JOEL JMSHX110 HF mass spectrometer using FAB+ ionization mode. Low-resolution mass spectrometry (LRMS) was performed on a JEOL JMS-LCmate liquid chromatography spectrometer system using APCI+ ionization technique. High-resolution mass spectra were obtained from the Columbia University Mass Spectrometry Facility on a JOEL JMSHX110 HF mass spectrometer using FAB+ ionization mode. HPLC analysis was performed on an Agilent Technologies 1200 series instrument with a Daicel Chiralpak AD-H or OD-H chiral column (25 cm) using the given conditions.

**Note:** For full details on the synthesis and characterization of compounds **1**, **16**, Table 2 (entries 2, 4 and 5), **23**, **27**, **43**, Table 5 (entry 7) see “Enantioselective Brønsted Base Catalysis with Chiral Cyclopropenimines.” Bandar, J. S.; Lambert, T. H. *J. Am. Chem. Soc.* **2012**, *134*, 5552-5555.

#### **Catalyst Syntheses**

**Cyclopropenimine 1 catalyst:** This is an optimized large-scale procedure for synthesis of the standard cyclopropenimine catalyst **1**. For synthesizing cyclopropenimine derivatives, chloro[bis(dicyclohexylamino)]cyclopropenium chloride was prepared and used as a common starting material as shown below.

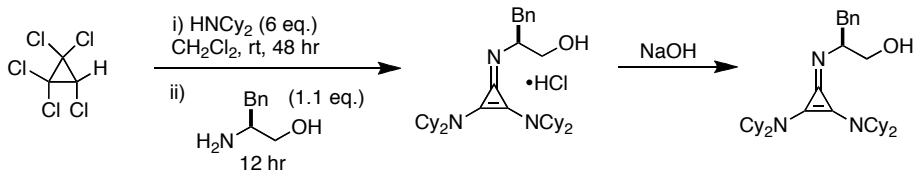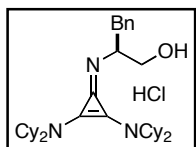

**(S)-2-(2,3-Bis(dicyclohexylamino)cyclopropenimine)-3-phenylpropan-1-ol hydrochloride (1•HCl).**

Dicyclohexylamine (108 mL, 541 mmol, 6.0 equiv) was slowly added to a solution of pentachlorocyclopropane<sup>1</sup> (19.3 g, 90.2 mmol, 1.0 equiv) in CH<sub>2</sub>Cl<sub>2</sub> (900 mL) in a 3L round bottom flask. A white precipitate formed as the reaction mixture was stirred for a further 48 hr at room temperature. Next, (*S*)-2-amino-3-phenylpropan-1-ol<sup>2</sup> (15.0 g, 99.2 mmol, 1.1 equiv) was added in one portion and the reaction mixture was stirred for an additional 12 hr. The crude reaction mixture was filtered through a celite plug, then washed with 1.0 M HCl (3 x 500 mL), dried with anhydrous sodium sulfate and concentrated *in vacuo* to yield crude cyclopropenimine hydrochloride salt as an off-white solid. Recrystallization from hot ethyl acetate/hexanes (approximately 1/2) yielded pure cyclopropenimine hydrochloride salt as a white solid (38.5 g, 73% yield). <sup>1</sup>H NMR (400 MHz, CDCl<sub>3</sub>) δ 7.35 (d, 9.2 Hz, 1H, NH), 7.0-7.15 (m, 5H, ArH), 5.17 (t, 5.6 Hz, 1H, -OH), 3.60-3.85 (m, 3H, NCHBnCH<sub>2</sub>OH), 3.10 (m, 4H, NCyH), 2.80-3.00 (m, 2H, -CH<sub>2</sub>Ph), 1.00-1.70 (m, 40H, CyH). <sup>13</sup>C NMR (100 MHz, CDCl<sub>3</sub>) δ 137.8, 129.2, 128.0, 126.2, 116.5, 114.5, 63.7, 61.3, 59.1, 38.4, 32.1, 31.9, 25.4, 24.4. IR (thin film, cm<sup>-1</sup>) 3175, 2929, 2855, 1498, 1450, 1372, 1317, 1181, 894, 727, 697. [α]<sub>D</sub><sup>20</sup> = -38.9 (1.0 c, CHCl<sub>3</sub>). LRMS (APCI+) m/z = 546.43 calcd for C<sub>36</sub>H<sub>56</sub>N<sub>3</sub>O [M]<sup>+</sup>, found 546.98.

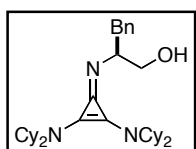

**(S)-2-(2,3-Bis(dicyclohexylamino)cyclopropenimine)-3-phenylpropan-1-ol (1).**

Cyclopropenimine freebase was prepared and stored in a freezer on a weekly basis. Pure cyclopropenimine freebase was quantitatively obtained by dissolving the corresponding hydrochloride salt in CH<sub>2</sub>Cl<sub>2</sub> and washing the solution with 1.0 M NaOH (3 x), drying with anhydrous sodium sulfate and concentrating *in vacuo*. The cyclopropenimine is obtained as an off-white solid. <sup>1</sup>H NMR (400 MHz, CDCl<sub>3</sub>) δ 7.10-7.25 (m, 5H, ArH), 3.79 (m, 1H, NCHBnCH<sub>2</sub>OH), 3.40-3.50 (m, 2H, NCHBnCH<sub>2</sub>OH), 3.00-3.10 (m, 4H, NCyH), 2.70-2.85 (m, 2H, -CH<sub>2</sub>Ph), 1.00-1.90 (m, 40H, CyH). <sup>13</sup>C NMR (100 MHz, CDCl<sub>3</sub>) δ 140.5, 129.7, 129.4, 127.8, 125.5, 65.1, 61.7, 58.3, 41.7, 34.4, 33.1, 32.8, 32.6, 26.3, 26.1, 25.3, 25.2.

**General scheme for bis(dicyclohexylamino)-based cyclopropenimines.**

<sup>1</sup> Tobey, S. W.; West, R. *J. Am. Chem. Soc.* **1966**, *88*, 2478.

<sup>2</sup> Shi, L.; Chen, L.; Chen, R.; Chen, L. *J. Label Compd. Radiopharm.* **2010**, *53*, 147-151.

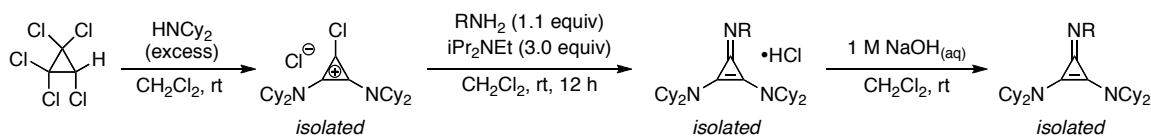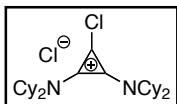

### Chloro[bis(dicyclohexylamino)]cyclopropenium chloride (15).

Dicyclohexylamine (186 mL, 936 mmol, 6.0 equiv) was slowly added to a solution of pentachlorocyclopropane (33.4 g, 156 mmol, 1.0 equiv) in dichloromethane (1.6 L, 0.1 M). The resulting solution was stirred at room temperature for a further 48 hours (hr) during which time a white precipitate formed. At this time concentrated HCl (200 mL) was added to precipitate excess dicyclohexylamine. The reaction mixture was filtered and the filtrate was washed with 1.0 M HCl (3 x 500 mL and 3 x 250 mL), dried with Na<sub>2</sub>SO<sub>4</sub> and concentrated *in vacuo*. The resulting crude solid was washed with hot ethyl acetate (3 x 200 mL) to yield the pure title compound as a white powder (60.0 g, 128 mmol, 82% yield). <sup>1</sup>H NMR (400 MHz, CDCl<sub>3</sub>) δ 3.62 (m, 2H, NCy<sub>2</sub>H), 3.44 (m, 2H, NCy<sub>2</sub>H), 2.11-1.30 (m, 40H, CyH). <sup>13</sup>C NMR (100 MHz, CDCl<sub>3</sub>) 132.2, 93.5, 65.8, 56.9, 32.7, 30.8, 25.4, 25.2, 24.5, 24.4. IR (thin film, cm<sup>-1</sup>) 2933, 2851, 1583, 1419, 1324, 1123, 990, 891. LRMS (APCI+) m/z = 413.37; calcd for C<sub>37</sub>H<sub>45</sub>N<sub>2</sub>O [M]<sup>+</sup> 413.35; note: this mass corresponds to hydrolyzed cyclopropenium depicted below:

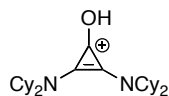

Chemical Formula: C<sub>27</sub>H<sub>45</sub>N<sub>2</sub>O<sup>+</sup>  
Exact Mass: 413.35

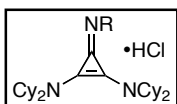

### General procedure for cyclopropenimine hydrochloride salt synthesis:

Chiral amine (1.10 equiv) was added to a solution of chloro[bis(dicyclohexylamino)]cyclopropenium chloride (1.00 equiv) and *N,N*-diisopropylethylamine (2.00-3.00 equiv) in dichloromethane (0.1 M). The reaction solution was stirred for 12 hr before being washed with 1.0 M HCl (3 x reaction volume), dried with Na<sub>2</sub>SO<sub>4</sub> and concentrated *in vacuo*. The crude solid material was recrystallized from a hot mixture of specified solvents to yield the pure title compound as a white solid. All cyclopropenimines were fully characterized as their hydrochloride salt.

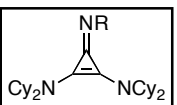

### General procedure for cyclopropenimine hydrochloride deprotonation:

The corresponding cyclopropenimine hydrochloride salt was dissolved in dichloromethane (approximately 0.2 M) and washed with an equal volume of 1.0 M NaOH<sub>(aq)</sub> (3 x). The dichloromethane solution was dried with Na<sub>2</sub>SO<sub>4</sub> and concentrated *in vacuo*. Notes: (a) the temperature of the rotovap was kept at or below 20 °C; (b) the resulting solid was further dried on a vacuum pump for two hr before use; (c) the catalyst was stored in a freezer while not in use; (d) this process was repeated on a weekly basis as needed. <sup>1</sup>H and <sup>13</sup>C NMR of the obtained freebase are included below. In certain cases characterization of neutral cyclopropenimines was complicated by: cyclopropene carbons were not always observed

in the  $^{13}\text{C}$  NMR, cyclohexane carbons appeared broad in the  $^{13}\text{C}$  NMR, and cyclopropenimine decomposition occurred quickly; thus all cyclopropenimines were fully characterized as their hydrochloride salts prior to deprotonation.

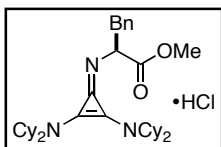

**(S)-Methyl 2-(2,3-bis(dicyclohexylamino)cyclopropenimine)-3-phenylpropanoate hydrochloride (17·HCl).** The general procedure was followed using L-phenylalanine methyl ester hydrochloride (500 mg, 2.32 mmol), chloro[bis(dicyclohexylamino)]cyclopropenium chloride (985 mg, 2.11 mmol) and *N,N*-diisopropylethylamine (0.90 mL, 6.33 mmol) in dichloromethane (21 mL). Recrystallization from hot ethyl acetate yielded the title product as a white solid (1.25 g, 2.05 mmol, 97% yield).  $^1\text{H}$  NMR (400 MHz,  $\text{CDCl}_3$ )  $\delta$  8.83 (d,  $J = 9.0$  Hz, 1H, NH), 7.45 (d,  $J = 7.1$  Hz, 2H, ArH), 7.26 (t,  $J = 7.5$  Hz, 2H, ArH), 7.22 (t,  $J = 7.3$  Hz, 1H, ArH), 4.45 (m, 1H, NCHCO<sub>2</sub>Me), 3.95 (dd,  $J = 9.4$  and 14.0 Hz, 1H, CHPh), 3.81 (s, 3H, CO<sub>2</sub>CH<sub>3</sub>), 3.42 (dd,  $J = 3.9$  and 14.0 Hz, 1H, CHPh), 3.28 (m, 4H, NCyH), 1.90-1.25 (m, 40H, CyH).  $^{13}\text{C}$  NMR (100 MHz,  $\text{CDCl}_3$ )  $\delta$  171.2, 137.1, 129.6, 128.3, 126.7, 115.9, 115.5, 61.2, 59.5, 52.7, 37.0, 32.6, 32.0, 26.0, 25.5, 25.5, 24.9, 24.5. IR (thin film,  $\text{cm}^{-1}$ ) 3223, 2926, 2858, 1740, 1498, 1453, 1372, 1256, 1181, 891.  $[\alpha]_D^{20} = -34.3$  (1.0 c,  $\text{CHCl}_3$ ). HRMS (FAB+)  $m/z = 574.4365$ ; calcd for  $\text{C}_{37}\text{H}_{56}\text{N}_3\text{O}_2$   $[\text{M}]^+$  574.4367.

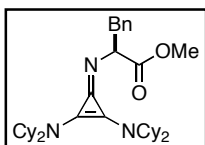

**(S)-Methyl 2-(2,3-bis(dicyclohexylamino)cyclopropenimine)-3-phenylpropanoate (17).**  $^1\text{H}$  NMR (400 MHz,  $\text{CDCl}_3$ )  $\delta$  7.30 (t,  $J = 7.1$  Hz, 2H, ArH), 7.16 (t,  $J = 7.1$  Hz, 2H, ArH), 7.11 (t,  $J = 7.3$  Hz, 1H, ArH), 4.33 (dd,  $J = 5.2$  and 8.2 Hz, 1H, Cp=NCH), 3.63 (s, 3H, CO<sub>2</sub>CH<sub>3</sub>), 3.116 (dd,  $J = 5.3$  and 13.1 Hz, 1H, CHPh), 3.12 (m, 4H, NCyH), 2.95 (dd,  $J = 8.4$  and 13.0 Hz, 1H, CHPh), 1.80-1.00 (m, 40H, CyH).  $^{13}\text{C}$  NMR (100 MHz,  $\text{CDCl}_3$ )  $\delta$  176.0, 140.4, 130.0, 127.6, 125.6, 117.6, 67.0, 58.5, 51.4, 42.1, 33.2, 32.7, 26.4, 26.3, 26.2, 25.3.

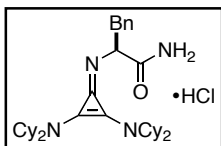

**(S)-2-(2,3-bis(dicyclohexylamino)cyclopropenimine)-3-phenylpropanamide hydrochloride (18·HCl).** The general procedure was followed using L-phenylalaninamide hydrochloride (500 mg, 3.05 mmol), chloro[bis(dicyclohexylamino)]cyclopropenium chloride (1.30 g, 2.77 mmol) and *N,N*-diisopropylethylamine (0.80 mL, 6.33 mmol) in dichloromethane (28 mL). Recrystallization from ethyl acetate/hexanes/dichloromethane yielded the title product as a white solid (1.40 g, 2.51 mmol, 90% yield).  $^1\text{H}$  NMR (400 MHz,  $\text{CDCl}_3$ )  $\delta$  9.5 (s, 1H, NH), 8.62 (d,  $J = 9.8$  Hz, 1H, CpNH), 7.41 (d,  $J = 7.2$  Hz, 2H, ArH), 7.30-7.18 (m, 3H, ArH), 5.53 (s, 1H, NH), 4.16 (m, 1H, NCHCONH<sub>2</sub>), 3.80 (dd,  $J = 11.2$  and 13.8 Hz, 1H, CHPh), 3.30 (m, 5H, CHPh and NCyH), 1.89-1.30 (m, 40H, CyH).  $^{13}\text{C}$  NMR (100 MHz,  $\text{CDCl}_3$ )  $\delta$  174.0, 137.3, 129.3, 128.0, 126.4, 115.0, 114.6, 64.8, 59.2, 38.4, 31.9, 31.8, 25.3, 25.3, 24.3. IR (thin film,  $\text{cm}^{-1}$ ) 3159, 2928, 2845, 1687, 1537, 1500, 1447, 1373, 1322, 1251, 1180, 895, 577.  $[\alpha]_D^{20} = 2.3$  (1.0 c,  $\text{CHCl}_3$ ). HRMS (FAB+)  $m/z = 559.4360$ ; calcd for  $\text{C}_{36}\text{H}_{55}\text{N}_4\text{O}$   $[\text{M}]^+$  559.4370.

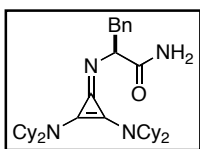

**(S)-2-(2,3-Bis(dicyclohexylamino)cyclopropenimine)-3-phenylpropanamide (18).**  $^1\text{H}$  NMR (400 MHz,  $\text{CDCl}_3$ )  $\delta$  7.28 (m, 2H, ArH), 7.16-7.10 (m, 3H, ArH), 4.26 (dd,  $J = 4.4$  and  $6.1$  Hz, 1H, Cp=NCH), 3.15-2.95 (m, 6H, NCyH and  $\text{CH}_2\text{Ph}$ ), 1.85-1.05 (m, 40H, CyH).  $^{13}\text{C}$  NMR (100 MHz,  $\text{CDCl}_3$ )  $\delta$  179.4, 139.5, 130.4, 127.2, 126.6, 125.5, 114.7, 111.4, 66.2, 58.8, 57.7, 42.5, 33.3, 33.1, 32.4, 32.1, 26.3, 26.2, 26.1, 25.3.

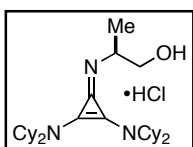

**(S)-2-(2,3-Bis(dicyclohexylamino)cyclopropenimine)propan-1-ol hydrochloride (29·HCl).** The general procedure was followed using (*S*)-2-amino-1-propanol (1.0 mL, 12.8 mmol), chloro[bis(dicyclohexylamino)]cyclopropenium chloride (5.45 g, 11.7 mmol) and *N,N*-diisopropylethylamine (3.3 mL, 23.3 mmol) in dichloromethane (117 mL). Recrystallization from ethyl acetate/hexanes yielded the title product as a white solid (4.50 g, 9.58 mmol, 82% yield).  $^1\text{H}$  NMR (400 MHz,  $\text{CDCl}_3$ )  $\delta$  7.78 (d,  $J = 6.8$  Hz, 1H, CpNH), 5.44 (s, 1H, OH), 3.85 (m, 3H, NCHCH<sub>2</sub>OH), 3.35 (m, 4H, NCyH), 1.95-1.20 (m, 40H, CyH), 1.26 (d,  $J = 6.2$  Hz, 3H, CH<sub>3</sub>).  $^{13}\text{C}$  NMR (100 MHz,  $\text{CDCl}_3$ )  $\delta$  116.6, 115.2, 64.5, 59.7, 55.5, 32.4, 25.8, 25.7, 24.7, 19.1. IR (thin film,  $\text{cm}^{-1}$ ) 2927, 2853, 1525, 1491, 1446, 1370, 1252, 1058, 1020, 990, 895, 577.  $[\alpha]_{\text{D}}^{20} = -0.5$  (1.0 c,  $\text{CHCl}_3$ ). LRMS (APCI+)  $m/z = 310.36$ ; calcd for  $\text{C}_{18}\text{H}_{35}\text{N}_3\text{O}$   $[\text{M}]^+$  310.28. HRMS (FAB+)  $m/z = 470.4121$ ; calcd for  $\text{C}_{30}\text{H}_{52}\text{N}_3\text{O}$   $[\text{M}]^+$  470.4105.

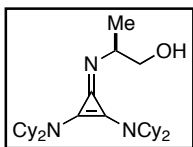

**(S)-2-(2,3-Bis(dicyclohexylamino)cyclopropenimine)propan-1-ol (29).**  $^1\text{H}$  NMR (400 MHz,  $\text{CDCl}_3$ )  $\delta$  3.62-3.55 (m, 2H, CHOH and Cp=NCH), 3.30 (dd,  $J = 6.4$  and  $9.2$  Hz, 1H, CHOH), 3.17 (m, 4H, NCyH), 1.90-1.10 (m, 40H, CyH), 1.10 (d,  $J = 6.2$  Hz, 3H, CH<sub>3</sub>).  $^{13}\text{C}$  NMR (100 MHz,  $\text{CDCl}_3$ )  $\delta$  113.7, 67.6, 58.4, 55.8, 32.9, 32.8, 26.3, 26.2, 25.3, 21.0.

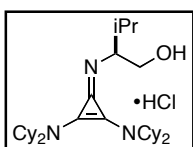

**(S)-2-(2,3-Bis(dicyclohexylamino)cyclopropenimine)-3-methylbutan-1-ol hydrochloride (30·HCl).** The general procedure was followed using (*S*)-2-amino-3-methyl-1-butanol (1.00 g, 9.69 mmol), chloro[bis(dicyclohexylamino)]cyclopropenium chloride (4.12 g, 8.81 mmol) and *N,N*-diisopropylethylamine (2.5 mL, 17.6 mmol) in dichloromethane (88 mL). Recrystallization from ethyl acetate/hexanes yielded the title product as a white solid (3.50 g, 7.03 mmol, 80% yield).  $^1\text{H}$  NMR (400 MHz,  $\text{CDCl}_3$ )  $\delta$  7.55 (d,  $J = 9.0$  Hz, 1H, CpNH), 5.21 (s, 1H, OH), 4.02 (m, 1H, NCHCH<sub>2</sub>OH), 3.81 (m, 1H, CHOH), 3.45 (m, 1H, CHOH) 3.45 (m, 4H, NCyH), 2.09 (quintet,  $J = 6.9$  Hz, 1H, CHMe<sub>2</sub>), 1.94-1.20 (m, 40H, CyH), 0.98 (d,  $J = 6.7$  Hz, 6H, CH<sub>3</sub>).  $^{13}\text{C}$  NMR (100 MHz,  $\text{CDCl}_3$ )  $\delta$  117.3, 115.0, 65.1, 61.3, 59.4, 32.3, 32.2, 30.6, 25.6, 24.6, 19.5, 18.7. IR (thin film,  $\text{cm}^{-1}$ ) 3226, 2930, 2855, 1501, 1450, 1378, 1177, 894, 731.  $[\alpha]_{\text{D}}^{20} = -30.7$  (1.0 c,  $\text{CHCl}_3$ ). HRMS (FAB+)  $m/z = 498.4409$ ; calcd for  $\text{C}_{32}\text{H}_{56}\text{N}_3\text{O}$   $[\text{M}]^+$  498.4418.

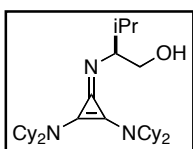

**(S)-2-(2,3-Bis(dicyclohexylamino)cyclopropenimine)-3-methylbutan-1-ol (30).**  $^1\text{H}$  NMR (400 MHz,  $\text{CDCl}_3$ )  $\delta$  3.52 (m, 2H, CH<sub>2</sub>OH), 3.30 (q,  $J = 5.8$  Hz, 1H, Cp=NCH), 3.13 (m, 4H, NCyH), 1.85-1.10 (m, 41H, CyH and CHMe<sub>2</sub>), 0.91 (d,  $J = 6.4$  Hz, 6H, 2 x CH<sub>3</sub>).  $^{13}\text{C}$  NMR (100

MHz, CDCl<sub>3</sub>) δ 65.8, 63.0, 58.4, 32.9, 32.8, 32.7, 26.2, 25.3, 19.9, 18.8.

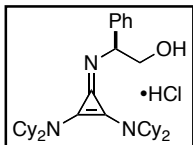

**(S)-2-(2,3-Bis(dicyclohexylamino)cyclopropenimine)-2-phenylethanol hydrochloride (31·HCl).** The general procedure was followed using (*S*)-2-phenylglycinol (500 mg, 3.64 mmol), chloro[bis(dicyclohexylamino)]cyclopropenium chloride (1.55 g, 3.31 mmol) and *N,N*-diisopropylethylamine (1.0 mL, 6.62 mmol) in dichloromethane (33 mL). Recrystallization from ethyl acetate/hexanes/dichloromethane yielded the title product as a white solid (1.89 g, 3.08 mmol, 93% yield). <sup>1</sup>H NMR (400 MHz, CDCl<sub>3</sub>) δ 8.04 (d, *J* = 5.8 Hz, 1H, CpNH), 7.36-7.25 (m, 5H, ArH), 5.95 (t, *J* = 7.4 Hz, 1H, OH), 4.97 (m, 1H, CHPh), 4.05 (m, 1H, CHOH), 3.93 (m, 1H, CHOH), 3.30 (m, 4H, NCyH), 1.95-1.20 (m, 40H, CyH). <sup>13</sup>C NMR (100 MHz, CDCl<sub>3</sub>) δ 139.4, 128.8, 127.7, 126.1, 116.5, 116.0, 65.8, 63.7, 59.6, 32.2, 32.2, 25.7, 25.6, 24.6. IR (thin film, cm<sup>-1</sup>) 3168, 2928, 2858, 1500, 1447, 1375, 1068, 898, 726, 703. [α]<sub>D</sub><sup>20</sup> = 6.3 (1.0 c, CHCl<sub>3</sub>). HRMS (FAB+) *m/z* = 532.4248; calcd for C<sub>35</sub>H<sub>54</sub>N<sub>3</sub>O [M]<sup>+</sup> 532.4261.

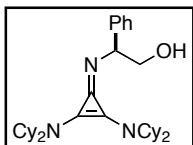

**(S)-2-(2,3-Bis(dicyclohexylamino)cyclopropenimine)-2-phenylethanol (31).** <sup>1</sup>H NMR (400 MHz, CDCl<sub>3</sub>) δ 7.35 (d, *J* = 7.4 Hz, 2H, ArH), 7.25 (m, 2H, ArH), 7.13 (t, *J* = 7.3 Hz, 1H, ArH), 4.69 (dd, *J* = 4.7 and 7.5 Hz, 1H, NCHPh), 3.80 (dd, *J* = 4.6 and 9.3 Hz, 1H, CHOH), 3.39 (t, *J* = 8.0 Hz, 1H, CHOH), 3.07 (br s, 4H, NCyH), 1.90-0.95 (m, 40H, CyH). <sup>13</sup>C NMR (100 MHz, CDCl<sub>3</sub>) δ 145.7, 128.0, 127.0, 126.0, 68.7, 64.4, 58.1, 33.1, 32.7, 26.4, 26.2, 26.1, 25.3.

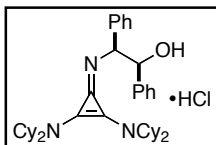

**(1*S*,2*S*)-2-(2,3-Bis(dicyclohexylamino)cyclopropenimine)-1,2-diphenylethanol hydrochloride (32·HCl).** The general procedure was followed using (*S,S*)-2-amino-1,2-diphenylethanol (500 mg, 2.34 mmol), chloro[bis(dicyclohexylamino)]cyclopropenium chloride (996 mg, 2.13 mmol) and *N,N*-diisopropylethylamine (0.60 mL, 4.26 mmol) in dichloromethane (21 mL). Recrystallization from ethyl acetate/hexanes yielded the title product as a white solid (1.33 g, 2.06 mmol, 97% yield). <sup>1</sup>H NMR (400 MHz, CDCl<sub>3</sub>) δ 8.61 (d, *J* = 8.3 Hz, 1H, CpNH), 7.21-7.10 (m, 10H, ArH), 6.26 (m, 1H, CHPh), 5.31 (s, 1H, OH), 4.76 (t, *J* = 8.0 Hz, 1H, CHPh), 3.31 (m, 4H, NCyH), 1.90-1.20 (m, 40H, CyH). <sup>13</sup>C NMR (100 MHz, CDCl<sub>3</sub>) δ 141.2, 139.7, 128.2, 127.7, 127.6, 127.5, 127.2, 127.1, 116.3, 115.6, 68.6, 59.5, 32.2, 62.1, 25.6, 25.5, 24.6. IR (thin film, cm<sup>-1</sup>) 3152, 2927, 2855, 1499, 1447, 1372, 1179, 1056, 700. [α]<sub>D</sub><sup>20</sup> = -19.9 (1.0 c, CHCl<sub>3</sub>). HRMS (FAB+) *m/z* = 608.4580; calcd for C<sub>41</sub>H<sub>58</sub>N<sub>3</sub>O [M]<sup>+</sup> 608.4574.

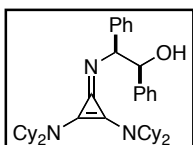

**(1*S*,2*S*)-2-(2,3-Bis(dicyclohexylamino)cyclopropenimine)-1,2-diphenylethanol (32).** <sup>1</sup>H NMR (400 MHz, CDCl<sub>3</sub>) δ 7.30-7.12 (m, 10H, ArH), 4.60 (d, *J* = 4.6 Hz, 1H, CHPh), 4.50 (d, *J* = 4.4 Hz, 1H, CHAr), 3.04 (br s, 4H, NCyH), 1.79-1.00 (m, 40H, CyH). <sup>13</sup>C NMR (100 MHz, CDCl<sub>3</sub>) δ 146.2, 144.8, 127.7, 127.6, 127.5, 126.9, 126.6, 126.2, 125.9, 79.2, 70.4, 58.1, 32.6, 26.2, 26.1, 25.3.

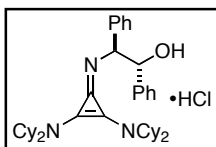

**(1*R*,2*S*)-2-(2,3-Bis(dicyclohexylamino)cyclopropenimine)-1,2-diphenylethanol hydrochloride (33·HCl).** The general procedure was followed using (1*R*,2*S*)-2-amino-1,2-diphenylethanol (500 mg, 2.34 mmol), chloro[bis(dicyclohexylamino)]cyclopropenium chloride (996 mg, 2.13 mmol) and *N,N*-diisopropylethylamine (0.60 mL, 4.26 mmol) in dichloromethane (21 mL). Recrystallization from ethyl acetate/hexanes yielded the title product as a white solid (1.23 g, 2.02 mmol, 95% yield). <sup>1</sup>H NMR (400 MHz, CDCl<sub>3</sub>) δ 7.33 (d, *J* = 7.2 Hz, 1H, CpNH), 7.21-7.00 (m, 10H, ArH), 6.69 (m, 1H, CHPh), 5.68 (s, 1H, OH), 5.28 (dd, *J* = 2.8 and 7.4 Hz, 1H, CHPh), 3.31 (m, 4H, NCyH), 1.90-1.20 (m, 40H, CyH). <sup>13</sup>C NMR (100 MHz, CDCl<sub>3</sub>) δ 139.9, 137.6, 127.9, 127.8, 127.6, 127.5, 127.2, 126.7, 115.5, 115.4, 74.5, 66.4, 59.4, 32.3, 25.6, 25.5, 24.7. IR (thin film, cm<sup>-1</sup>) 3199, 2933, 2855, 1501, 1453, 1375, 1181, 890.1, 740.9. [α]<sub>D</sub><sup>20</sup> = -38.2 (1.0 c, CHCl<sub>3</sub>). HRMS (FAB+) *m/z* = 608.4579; calcd for C<sub>41</sub>H<sub>58</sub>N<sub>3</sub>O [M]<sup>+</sup> 608.4574.

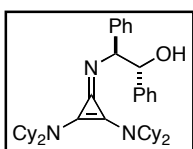

**(1*R*,2*S*)-2-(2,3-Bis(dicyclohexylamino)cyclopropenimine)-1,2-diphenylethanol (33).** <sup>1</sup>H NMR (400 MHz, CDCl<sub>3</sub>) δ 7.10-6.95 (m, 10H, ArH), 4.94 (m, 2H, 2 x CHPh), 3.21 (br s, 2H, NCyH), 2.99 (br s, 2H, NCyH), 1.95-1.10 (m, 40H, CyH). <sup>13</sup>C NMR (100 MHz, CDCl<sub>3</sub>) δ 142.9, 142.0, 128.4, 127.1, 127.0, 126.9, 126.2, 126.0, 125.7, 78.1, 69.0, 58.2, 33.1, 32.7, 26.2, 26.1, 25.3.

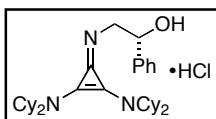

**(*R*)-2-(2,3-Bis(dicyclohexylamino)cyclopropenimine)-1-phenylethanol hydrochloride (34·HCl).** The general procedure was followed using (*R*)-2-amino-1-phenylethanol (301 mg, 2.20 mmol), chloro[bis(dicyclohexylamino)]cyclopropenium chloride (935 mg, 2.00 mmol) and *N,N*-diisopropylethylamine (0.68 mL, 4.00 mmol) in dichloromethane (20 mL). Recrystallization from ethyl acetate/hexanes yielded the title product as a white solid (957 mg, 1.80 mmol, 90% yield). <sup>1</sup>H NMR (400 MHz, CDCl<sub>3</sub>) δ 8.17 (t, *J* = 5.4 Hz, 1H, CpNH), 7.44 (d, *J* = 7.4 Hz, 2H, ArH), 7.29 (t, *J* = 7.3 Hz, 2H, ArH), 7.22 (t, *J* = 7.2 Hz, 1H, ArH), 5.88 (s, 1H, OH), 5.15 (d, *J* = 7.3 Hz, 1H, CHPh), 3.84-3.73 (m, 2H, NCH<sub>2</sub>), 3.30 (m, 4H, NCyH), 1.90-1.20 (m, 40H, CyH). <sup>13</sup>C NMR (100 MHz, CDCl<sub>3</sub>) δ 142.1, 128.2, 127.4, 126.1, 116.6, 114.5, 72.1, 59.6, 54.3, 32.3, 25.7, 24.5. IR (thin film, cm<sup>-1</sup>) 3141, 2930, 2855, 1528, 1491, 1447, 1372, 1099, 891. [α]<sub>D</sub><sup>20</sup> = -9.7 (1.0 c, CHCl<sub>3</sub>). HRMS (FAB+) *m/z* = 532.4261; calcd for C<sub>35</sub>H<sub>54</sub>N<sub>3</sub>O [M]<sup>+</sup> 532.4261.

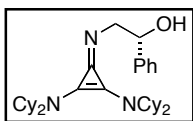

**(*R*)-2-(2,3-Bis(dicyclohexylamino)cyclopropenimine)-1-phenylethanol (34).** <sup>1</sup>H NMR (400 MHz, CDCl<sub>3</sub>) δ 7.42 (d, *J* = 7.3 Hz, 2H, ArH), 7.30 (t, *J* = 7.4 Hz, 2H, ArH), 7.20 (t, *J* = 7.3 Hz, 1H, ArH), 4.70 (dd, *J* = 4.0 and 8.8 Hz, 1H, CHPhOH), 3.85 (dd, *J* = 4.2 and 11.6 Hz, 1H, Cp=NCH), 3.35 (dd, *J* = 9.1 and 11.6 Hz, 1H, Cp=NCH), 3.12 (m, 4H, NCyH), 1.95-1.00 (m, 40H, CyH). <sup>13</sup>C NMR (100 MHz, CDCl<sub>3</sub>) δ 144.0, 128.0, 126.7, 126.0, 73.6, 59.6, 58.4, 32.7, 26.3, 25.3.

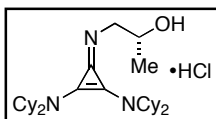

**(R)-1-(2,3-Bis(dicyclohexylamino)cyclopropenimine)propan-2-ol hydrochloride (35·HCl).** The general procedure was followed using (R)-1-amino-2-propanol (165 mg, 2.20 mmol), chloro[bis(dicyclohexylamino)]cyclopropenium chloride (935 mg,

2.00 mmol) and *N,N*-diisopropylethylamine (0.68 mL, 4.00 mmol) in dichloromethane (20 mL). Recrystallization from ethyl acetate/hexanes yielded the title product as a white solid (780 mg, 1.66 mmol, 83% yield). <sup>1</sup>H NMR (400 MHz, CDCl<sub>3</sub>) δ 7.94 (s, 1H, CpNH), 5.26 (s, 1H, OH), 4.23 (m, 1H, CHMe), 3.50 (m, 2H, NCH<sub>2</sub>), 3.31 (m, 4H, NCyH), 1.90-1.20 (m, 40H, CyH), 1.23 (d, J = 4.6 Hz, 3H, CH<sub>3</sub>). <sup>13</sup>C NMR (100 MHz, CDCl<sub>3</sub>) δ 116.9, 114.5, 65.6, 59.6, 54.3, 32.4, 32.3, 25.8, 24.7, 20.8. IR (thin film, cm<sup>-1</sup>) 3226, 2933, 2858, 1494, 1453, 1375, 1321, 1249, 1181, 894. [α]<sub>D</sub><sup>20</sup> = -9.9 (1.0 c, CHCl<sub>3</sub>). HRMS (FAB+) m/z = 470.4117; calcd for C<sub>30</sub>H<sub>52</sub>N<sub>3</sub>O [M]<sup>+</sup> 470.4105.

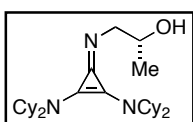

**(R)-1-(2,3-Bis(dicyclohexylamino)cyclopropenimine)propan-2-ol (35).** <sup>1</sup>H NMR (400 MHz, CDCl<sub>3</sub>) δ 3.79 (m, 1H, CHOH), 3.59 (dd, J = 3.7 and 11.4 Hz, 1H, Cp=NCH), 3.13 (m, 5H, NCyH and Cp=NCH), 1.90-1.20 (m, 40H, CyH), 1.17 (d, J = 6.1 Hz, 3H, CH<sub>3</sub>). <sup>13</sup>C NMR (100

MHz, CDCl<sub>3</sub>) δ 67.4, 58.8, 58.4, 32.8, 26.3, 25.4, 20.2.

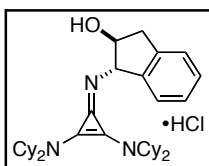

**(1S,2S)-1-(2,3-Bis(dicyclohexylamino)cyclopropenimine)-2,3-dihydro-1H-inden-2-ol hydrochloride (36·HCl).** The general procedure was followed using (1S,2S)-*trans*-1-amino-2-indanol (300 mg, 2.01 mmol), chloro[bis(dicyclohexylamino)]cyclopropenium chloride (855 mg, 1.83 mmol) and *N,N*-diisopropylethylamine (0.55

mL, 3.84 mmol) in dichloromethane (18 mL). Recrystallization from ethyl acetate/hexanes yielded the title product as a white solid (1.00 g, 1.72 mmol, 94% yield). <sup>1</sup>H NMR (400 MHz, CDCl<sub>3</sub>) δ 7.72 (d, J = 5.9 Hz, 1H, CpNH), 7.21-7.10 (m, 3H, ArH), 6.97 (d, J = 7.4 Hz, 1H, ArH), 6.1 (s, 1H, OH), 5.00 (q, J = 9.1 Hz, 1H, CHOH), 4.91 (t, J = 6.2 Hz, 1H, CHNH), 3.37 (m, 4H, NCyH), 3.20 (dd, J = 7.3 and 15.2 Hz, 1H, CHAr), 2.96 (dd, J = 9.9 and 15.0 Hz, 1H, CHAr), 1.90-1.20 (m, 40H, CyH). <sup>13</sup>C NMR (125 MHz, CDCl<sub>3</sub>) δ 140.6, 139.2, 128.3, 126.8, 125.3, 122.4, 116.6, 115.1, 77.9, 68.5, 59.5, 37.1, 32.4, 32.2, 25.6, 25.5, 24.6. IR (thin film, cm<sup>-1</sup>) 3209, 2926, 2855, 1498, 1447, 1375, 1177, 894, 744. [α]<sub>D</sub><sup>20</sup> = 79.0 (1.0 c, CHCl<sub>3</sub>). HRMS (FAB+) m/z = 544.4283; calcd for C<sub>36</sub>H<sub>54</sub>N<sub>3</sub>O [M]<sup>+</sup> 544.4261.

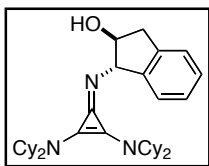

**(1S,2S)-1-(2,3-Bis(dicyclohexylamino)cyclopropenimine)-2,3-dihydro-1H-inden-2-ol (36).** <sup>1</sup>H NMR (400 MHz, CDCl<sub>3</sub>) δ 7.13 (m, 4H, ArH), 4.74 (d, J = 7.9 Hz, 1H, NCHAr), 4.40 (broad q, J = 7.5 Hz, 1H, CHOH), 3.20 (m, 4H, NCyH), 3.11 (dd, J = 7.4 Hz, 1H, CHAr), 2.85 (dd, J = 9.7 and 14.7 Hz, 1H, CHAr), 1.90-1.00 (m, 40H, CyH).

<sup>13</sup>C NMR (100 MHz, CDCl<sub>3</sub>) δ 138.9, 126.8, 126.5, 124.4, 124.0, 82.0, 73.1, 58.5, 37.3, 32.9, 26.3, 26.1, 25.2.



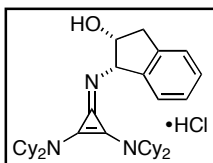

**(1*S*,2*R*)-1-(2,3-Bis(dicyclohexylamino)cyclopropenimine)-2,3-dihydro-1*H*-inden-2-ol hydrochloride (37·HCl).** The general procedure was followed using (1*S*,2*R*)-*cis*-1-amino-2-indanol (300 mg, 2.01 mmol), chloro[bis(dicyclohexylamino)]cyclopropenium chloride (855 mg, 1.83 mmol) and *N,N*-diisopropylethylamine (0.55 mL, 3.84 mmol) in dichloromethane (18 mL). Recrystallization from ethyl acetate/hexanes yielded the title product as a white solid (1.04 g, 1.79 mmol, 98% yield). <sup>1</sup>H NMR (400 MHz, CDCl<sub>3</sub>) δ 7.28-7.15 (m, 4H, ArH), 6.80 (br s, 1H, OH), 6.55 (d, *J* = 8.4 Hz, 1H, CpNH), 5.05 (m, 2H, CHOH and CHNH), 3.35 (m, 4H, NCyH), 3.20-3.14 (m, 2H, CH<sub>2</sub>Ar), 1.90-1.20 (m, 40H, CyH). <sup>13</sup>C NMR (100 MHz, CDCl<sub>3</sub>) δ 141.4, 140.4, 128.6, 126.7, 125.9, 123.6, 115.8, 114.6, 71.7, 63.6, 59.4, 40.0, 32.6, 32.5, 26.1, 25.7, 25.6, 24.8. IR (thin film, cm<sup>-1</sup>) 3155, 2930, 2858, 1501, 1450, 1372, 1181, 894, 734. [α]<sub>D</sub><sup>20</sup> = 85.0 (1.0 c, CHCl<sub>3</sub>). HRMS (FAB+) *m/z* = 544.4246; calcd for C<sub>36</sub>H<sub>54</sub>N<sub>3</sub>O [M]<sup>+</sup> 544.4261.

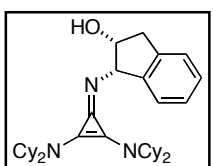

**(1*S*,2*R*)-1-(2,3-Bis(dicyclohexylamino)cyclopropenimine)-2,3-dihydro-1*H*-inden-2-ol (37).** <sup>1</sup>H NMR (400 MHz, CDCl<sub>3</sub>) δ 7.15 (m, 4H, ArH), 5.00 (d, *J* = 5.0 Hz, 1H, NCHAr), 4.40 (broad t, *J* = 3.6 Hz, 1H, CHOH), 3.20 (m, 4H, NCyH), 3.03 (m, 2H, CH<sub>2</sub>Ar), 1.90-1.00 (m, 40H, CyH). <sup>13</sup>C NMR (100 MHz, CDCl<sub>3</sub>) δ 147.0, 141.3, 126.7, 126.2, 125.0, 73.6, 67.9, 58.5, 39.5, 33.2, 32.9, 26.4, 26.3, 26.2, 25.3.

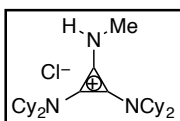

***N*-Methyl-(2,3-bis(dicyclohexylamino)cyclopropenimine) hydrochloride (26·HCl).** The general procedure was followed using methylamine (1.1 mL 2.0M in THF, 2.14 mmol), chloro[bis(dicyclohexylamino)]cyclopropenium chloride (1.00 g, 2.14 mmol) and *N,N*-diisopropylethylamine (1.12 mL, 6.42 mmol) in dichloromethane (21 mL). Recrystallization from ethyl acetate/hexanes yielded the title product as a white solid (892 mg, 1.93 mmol, 90% yield). <sup>1</sup>H NMR (400 MHz, CD<sub>3</sub>CN) δ 7.11 (s, 1H, NH), 3.36 (tt, *J* = 3.9 and 12.1 Hz, 4H, NCyH), 3.12 (d, *J* = 4.8 Hz, 3H, NCH<sub>3</sub>), 1.95-1.20 (m, 40H, CyH). <sup>13</sup>C NMR (125 MHz, CD<sub>3</sub>CN) δ 117.7, 115.6, 60.1, 33.1, 32.7, 26.5, 25.3. IR (thin film, cm<sup>-1</sup>) 2925, 2854, 1500, 1447, 1371, 1251, 1182, 1078, 894. HRMS (FAB+) *m/z* = 426.3839; calcd for C<sub>28</sub>H<sub>48</sub>N<sub>3</sub> [M]<sup>+</sup> 426.3843.

### Synthesis of bis(diisopropylamino)-based cyclopropenimines.

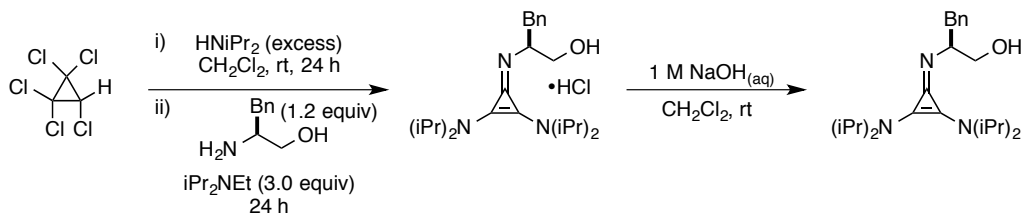

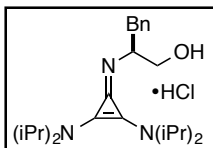

**(S)-2-(2,3-Bis(diisopropylamino)cyclopropenimine)-3-phenylpropan-1-ol hydrochloride (23·HCl).** Diisopropylamine (3.93 mL, 27.9 mmol, 6.0 equiv) was slowly added to a solution of pentachlorocyclopropane<sup>3</sup> (0.57 mL, 4.65 mmol, 1.0 equiv) in CH<sub>2</sub>Cl<sub>2</sub> (46 mL, 0.1 M) in a 250 mL round bottom flask. The reaction mixture was stirred for a further 24 hr at room temperature. Next, *N,N*-diisopropylethylamine (2.40 mL, 14.1 mmol, 3.0 equiv) and (*S*)-2-amino-3-phenylpropan-1-ol<sup>4</sup> (854 mg, 5.65 mmol, 1.2 equiv) was added in one portion and the reaction mixture was stirred for an additional 24 hr. The crude reaction mixture was then washed with 1.0 M HCl (3 x 100 mL), dried with anhydrous sodium sulfate and concentrated *in vacuo* to yield crude cyclopropenimine hydrochloride salt as an off-white solid. Recrystallization from ethyl acetate/hexanes (approximately 2/1) yielded pure cyclopropenimine hydrochloride salt as a white solid (1.73 g, 4.10 mmol, 88% yield). <sup>1</sup>H NMR (400 MHz, CDCl<sub>3</sub>) δ 7.10-7.25 (m, 5H, ArH), 6.30 (d, 9.6 Hz, NH), 3.60-4.0 (m, 8H, NCHBnCH<sub>2</sub>OH, NCH(CH<sub>3</sub>)<sub>2</sub>), 1.20 (m, 24H, NCH(CH<sub>3</sub>)<sub>2</sub>); <sup>13</sup>C NMR (100 MHz, CDCl<sub>3</sub>) δ 137.9, 129.5, 128.5, 126.6, 116.3, 113.7, 64.6, 62.4, 50.5, 38.1, 22.1, 22.0. IR (thin film, cm<sup>-1</sup>) 3257, 3124, 2971, 2930, 1501, 1457, 1344, 1211, 1136, 1034, 700. [α]<sub>D</sub><sup>20</sup> = -42.5 (1.0 c, CHCl<sub>3</sub>). LRMS (APCI+) m/z = 386.32 calcd for C<sub>24</sub>H<sub>40</sub>N<sub>3</sub>O [M+]<sup>+</sup>, found 386.31.

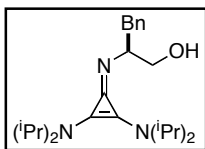

**(S)-2-(2,3-Bis(diisopropylamino)cyclopropenimine)-3-phenylpropan-1-ol (23).** Pure cyclopropenimine freebase was quantitatively obtained by dissolving the corresponding hydrochloride salt in CH<sub>2</sub>Cl<sub>2</sub> and washing the solution with 1.0 M NaOH (3 x), drying with anhydrous sodium sulfate and concentrating *in vacuo*. The cyclopropenimine is obtained as an off-white solid. The isolated cyclopropenimine was used immediately after deprotonation. Note: identical spectra were obtained when deprotonated with sodium hydride in acetonitrile. <sup>1</sup>H NMR (400 MHz, CD<sub>3</sub>CN) δ 7.10-7.30 (m, 5H, ArH), 3.60-3.75 (m, 5H, NCH(CH<sub>3</sub>)<sub>2</sub>, NCHBnCH<sub>2</sub>OH), 3.20-3.40 (m, 2H, NCHBnCH<sub>2</sub>OH), 2.60-2.80 (m, 2H, NCHCH<sub>2</sub>Ph), 1.20 (d, 6.8 Hz, 24H, NCH(CH<sub>3</sub>)<sub>2</sub>); <sup>13</sup>C NMR (100 MHz, CD<sub>3</sub>CN) δ 141.5, 130.5, 128.8, 128.3, 126.5, 66.6, 64.6, 50.1, 42.3, 22.6, 22.5; [α]<sub>D</sub><sup>20</sup> = -10.1 (2.0 c, CHCl<sub>3</sub>).

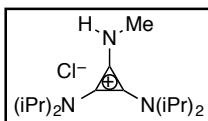

***N*-Methyl-(2,3-Bis(diisopropylamino)cyclopropenimine) (25·HCl).** This cyclopropenimine was prepared in an analogous fashion as directly above using pentachlorocyclopropane (347 mg, 1.62 mmol, 1.0 equiv), *N,N*-diisopropylamine (1.36 mL, 9.72 mmol, 6.0 equiv) and methylamine (2.44 mL of 2.0M THF solution, 4.88 mmol, 3.00 equiv). Silica gel column chromatography (20:1 DCM:MeOH) followed by recrystallization from ethyl acetate/hexanes yielded the titled product as an off-white solid (180 mg, 0.596 mmol, 37% yield). <sup>1</sup>H NMR (400 MHz, CD<sub>3</sub>CN) δ 8.37 (s, 1H, NH), 3.83 (quintet, J = 6.8 Hz, 4H, NCHMe<sub>2</sub>), 3.06 (d, J = 4.8 Hz, 3H, NCH<sub>3</sub>), 1.28 (d, J = 6.8 Hz, 24H, NCH(CH<sub>3</sub>)<sub>2</sub>). <sup>13</sup>C NMR (100 MHz, CD<sub>3</sub>CN) δ 118.1, 114.9, 51.3, 32.7, 22.1. IR (thin film, cm<sup>-1</sup>) 2929, 2858, 1504, 1451,

<sup>3</sup> Tobey, S. W.; West, R. *J. Am. Chem. Soc.* **1966**, *88*, 2478.

<sup>4</sup> Shi, L.; Chen, L.; Chen, R.; Chen, L. *J. Label Compd. Radiopharm.* **2010**, *53*, 147-151.

1370, 1344, 1194, 1155, 1134, 1032, 895. HRMS (FAB+)  $m/z = 266.2603$ ; calcd for  $C_{16}H_{32}N_3 [M]^+$  266.2591.

### Synthesis of bis(pyrrolidinol)-based cyclopropenimine.

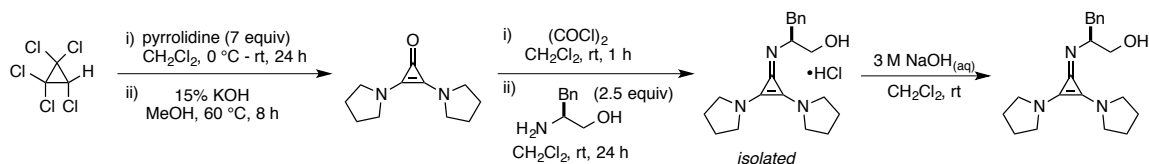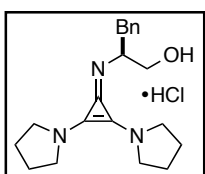

**(S)-2-(2,3-Bis(pyrrolidino)cyclopropenimine)-3-phenylpropan-1-ol hydrochloride (24·HCl).** Pyrrolidine (13.4 mL, 163.3 mmol, 7.0 equiv) was slowly added to a 0 °C solution of pentachlorocyclopropane (5 g, 23.3 mmol, 1.0 equiv) in dichloromethane (230 mL, 0.1 M). After addition the reaction solution was allowed to warm to room temperature and was stirred overnight before direct concentration by rotary evaporator to yield a crude mixture of tris(pyrrolidino)cyclopropenium chloride and pyrrolidine hydrochloride salts.

The crude solid from above was subjected to hydrolysis by dissolution in methanol (90 mL) and mixing with 15% KOH (13.5 g KOH in 90 mL H<sub>2</sub>O). The reaction mixture was stirred at 60 °C for 8 h before extraction with dichloromethane (3 x 100 mL). The extracted organics were dried with sodium sulfate and concentrated *in vacuo* to yield 2,3-di(pyrrolidin-1-yl)cycloprop-2-en-1-one. A crude <sup>1</sup>H NMR of this material is provided below. This material was not further purified.

Oxalyl chloride (0.27 mL, 3.12 mmol, 1.5 equiv) was added dropwise to a solution of 2,3-di(pyrrolidin-1-yl)cycloprop-2-en-1-one (400 mg, 2.08 mmol, 1.0 equiv) in dichloromethane (21 mL, 1.0 M). After stirring for 1 hr at room temperature the reaction solution was concentrated *in vacuo* and further dried on a vacuum pump for an additional 2 hr. The obtained crude solid was then redissolved in dichloromethane (21 mL, 1.0 M) and (S)-2-amino-3-phenylpropan-1-ol (786 mg, 5.20 mmol, 2.5 equiv) was added in one portion. After stirring at room temperature overnight the reaction solution was washed with 1 M HCl (3 x 10 mL), dried with sodium sulfate and concentrated *in vacuo* to a crude solid. Purification by silica gel chromatography (5-10% MeOH/DCM eluent) yielded the title hydrochloride salt as a tan solid (254 mg, 0.702 mmol, 34% yield from cyclopropenone). <sup>1</sup>H NMR (500 MHz, CDCl<sub>3</sub>) δ 8.90 (d, J = 8.5 Hz, 1H, CpNH), 7.35 (m, 4H, ArH), 7.19 (t, J = 7.1 Hz, 1H, ArH), 4.86 (s, 1H, OH), 3.72 (dd, J = 3.2 and 11.6 Hz, 1H, CHOH), 3.56 (m, 1H, CHOH), 3.49 (m, 1H, CpNCHBn), 3.45 (br s, 8H, CpNCH<sub>2</sub> x 4), 2.93 (dd, J = 5.6 and 13.6 Hz, 1H, CHPh), 2.87 (dd, J = 8.7 and 13.6 Hz, 1H, CHPh), 1.91 (quintet, J = 3.5 Hz, -CH<sub>2</sub>- x 4). <sup>13</sup>C NMR (125 MHz, CD<sub>3</sub>CN) δ 139.8, 130.6, 129.3, 127.2, 115.7, 114.0, 64.8, 63.4, 51.3, 38.6, 26.3. IR (thin film, cm<sup>-1</sup>) 3134,

2926, 2871, 1505, 1478, 1453, 1345, 1178, 1047, 744, 702.  $[\alpha]_D^{20} = -28.3$  (1.0 c,  $\text{CHCl}_3$ ). HRMS (FAB+)  $m/z = 326.2221$ ; calcd for  $\text{C}_{20}\text{H}_{28}\text{N}_3\text{O}$   $[\text{M}]^+$  326.2227.

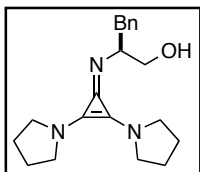

**(S)-2-(2,3-Bis(pyrrolidino)cyclopropenimine)-3-phenylpropan-1-ol (24).** Neutral cyclopropenimine was obtained by dissolving the corresponding hydrochloride salt in  $\text{CH}_2\text{Cl}_2$  and washing the solution with 3.0 M NaOH (3 x), drying with anhydrous sodium sulfate and concentrating *in vacuo*. The cyclopropenimine is obtained as a brown solid. Note: treatment with sodium hydride or potassium *tert*-butoxide in acetonitrile did not appear to achieve deprotonation (the material obtained from these deprotonation attempts did not have any catalytic activity for the glycinate imine Michael reaction).  $^1\text{H}$  NMR (300 MHz,  $\text{CDCl}_3$ )  $\delta$  7.40-7.10 (m, 5H, ArH), 3.50-3.40 (m, 2H,  $\text{CH}_2\text{OH}$ ), 3.28 (br s, 9H, 4 x  $\text{NCH}_2$  and  $\text{NCHBn}$ ), 2.68 (m, 2H,  $\text{CH}_2\text{Ph}$ ), 1.85 (m, 8H, 4 x  $-\text{CH}_2-$ ).  $^{13}\text{C}$  NMR (100 MHz,  $\text{CD}_3\text{CN}$ )  $\delta$  141.1, 130.5, 129.0, 126.7, 113.3, 65.8, 65.4, 51.1, 40.0, 26.3.

### General procedure for catalyst structure-activity relationship study (Figure 3, Equation 6 and Table 3).

Freshly deprotonated cyclopropenimine (0.0169 mmol, 0.1 equiv) and *tert*-butyl glycinate benzophenone Schiff base (50 mg, 0.169 mmol, 1.0 equiv) were dissolved in ethyl acetate (0.48 mL, 0.35 M). Methyl acrylate (46.0  $\mu\text{L}$ , 0.508 mmol, 3.0 equiv) was then added to the vial and the reaction solution was stirred at room temperature. The reaction was monitored by  $^1\text{H}$  NMR spectroscopy and conversion was determined by comparing *tert*-butyl integrals of the starting material and product. Upon 95% conversion, or after 24 hr if not complete, the reaction solution was concentrated and the crude material subjected to silica gel column chromatography (1/5  $\text{Et}_2\text{O}$ /Hexanes) to yield pure product. Enantioselectivities were determined via chiral HPLC: Chiralpak AD-H (Hex/IPA = 97/3, 1.0 mL/min, 254 nm, 23°C), 6.1 min (minor), 6.7 min (major).

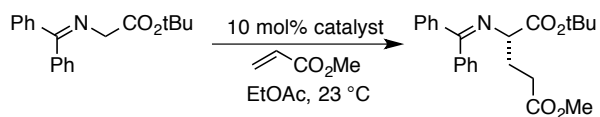

|  | catalyst  | R   | t (h) | conv. (%) | ee (%) |
|--|-----------|-----|-------|-----------|--------|
|  | <b>1</b>  | Bn  | 1     | 95        | 98     |
|  | <b>29</b> | Ph  | 24    | 70        | 86     |
|  | <b>30</b> | iPr | 4     | 95        | 95     |
|  | <b>31</b> | Me  | 4     | 95        | 97     |

|  | catalyst  | R                 | t (h) | conv. (%) | ee (%) |
|--|-----------|-------------------|-------|-----------|--------|
|  | <b>23</b> | NiPr <sub>2</sub> | 24    | 80        | 88     |
|  | <b>24</b> | pyrrolidino       | 24    | 18        | 65     |

|                                                 |                                         |                                                  |
|-------------------------------------------------|-----------------------------------------|--------------------------------------------------|
| <p><b>16</b></p> <p>24 h<br/>11% con, 0% ee</p> | <p><b>17</b></p> <p>48 h<br/>0% con</p> | <p><b>18</b></p> <p>24 h<br/>13% con, 89% ee</p> |
|-------------------------------------------------|-----------------------------------------|--------------------------------------------------|

|                                                  |                                                  |                                                   |
|--------------------------------------------------|--------------------------------------------------|---------------------------------------------------|
| <p><b>32</b></p> <p>24 h<br/>26% con, 77% ee</p> | <p><b>33</b></p> <p>24 h<br/>55% con, 22% ee</p> | <p><b>34</b></p> <p>24 h<br/>90% con, -73% ee</p> |
|--------------------------------------------------|--------------------------------------------------|---------------------------------------------------|

|                                                   |                                                 |                                                  |
|---------------------------------------------------|-------------------------------------------------|--------------------------------------------------|
| <p><b>35</b></p> <p>24 h<br/>95% con, -63% ee</p> | <p><b>36</b></p> <p>2 h<br/>95% con, 98% ee</p> | <p><b>37</b></p> <p>24 h<br/>15% con, 75% ee</p> |
|---------------------------------------------------|-------------------------------------------------|--------------------------------------------------|

The initial reaction profiles of the above Michael reactions catalyzed by cyclopropenimines **1** and **23**, monitored by crude <sup>1</sup>H NMR spectroscopy, are provided in the chart below.

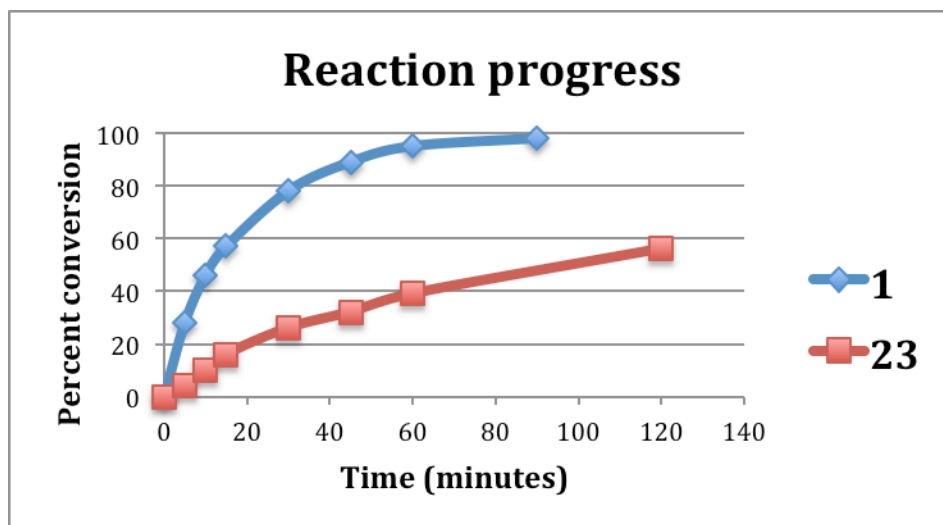

#### **pKa measurements.**

Note: Our previous method for determining cyclopropenimine hydrochloride salt  $pK_a$  relied on knowing the chemical shifts for both the cyclopropenimine hydrochloride and cyclopropenimine freebase. We recently found that depending on the base used to deprotonate cyclopropenimine hydrochloride salts (e.g. NaH, KOtBu, KH or NaOH) that the observed chemical shifts were rarely consistent. Thus, there was uncertainty associated with the identifying a chemical shift that accurately corresponded to the cyclopropenimine freebase. We therefore base our calculations below on the observed chemical shifts for the reference phosphazene base tBu-P<sub>1</sub>(pyrr).

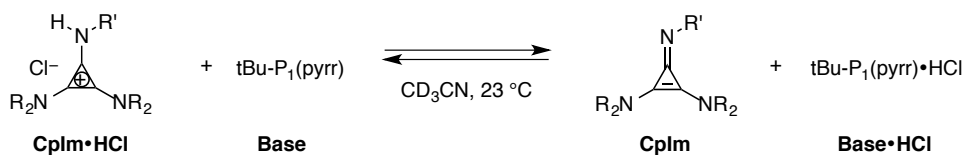

$$K = \frac{[\text{Base} \cdot \text{HCl}][\text{CpIm}]}{[\text{Base}][\text{CpIm} \cdot \text{HCl}]}$$

$$\text{p}K_a(\text{CpIm} \cdot \text{HCl}) = \text{p}K_a(\text{Base} \cdot \text{HCl}) - \log(K)$$

Chemical shifts used:

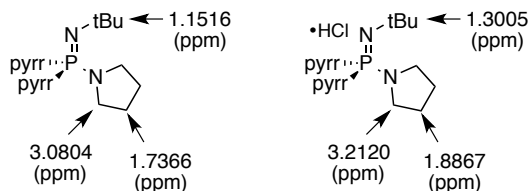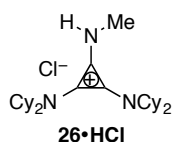

3.196, 1.2713

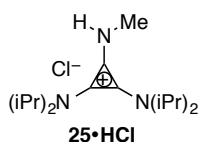

3.1488, 1.8002

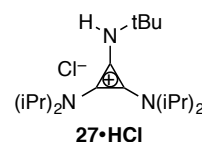

3.1763, 1.8528, 1.2635

Representative observed chemical shifts (ppm) for tBu-P<sub>1</sub>(pyrr):

Calculated equilibrium constant (K) and pK<sub>a</sub> of CpIm•HCl:

|  | Trial | K    | pK <sub>a</sub> | Trial | K    | pK <sub>a</sub> | Trial | K    | pK <sub>a</sub> |
|--|-------|------|-----------------|-------|------|-----------------|-------|------|-----------------|
|  | 1     | 22.2 | 27.1            | 1     | 0.79 | 28.5            | 1     | 9.0  | 27.5            |
|  | 2     | 25.6 | 27.0            | 2     | 1.76 | 28.2            | 2     | 7.3  | 27.6            |
|  | 3     | 24.8 | 27.0            | 3     | 0.64 | 28.6            | 3     | 10.0 | 27.4            |
|  | Avg   | 24.2 | 27.0            | Avg   | 1.06 | 28.4            | Avg   | 8.8  | 27.5            |

**General procedure.** Cyclopropenimine hydrochloride salts were recrystallized before use. Phosphazene base P<sub>1</sub>-t-Bu-tris(tetramethylene) (tBu-P<sub>1</sub>(pyrr)) was used from a freshly opened commercial source (Sigma Aldrich Co.). Reference chemical shifts for both the freebase and hydrochloride salts of tBu-P<sub>1</sub>(pyrr) were recorded in triplicate; the average chemical shifts are shown above. Stock solutions of cyclopropenimine hydrochloride salts and tBu-P<sub>1</sub>(pyrr) in CD<sub>3</sub>CN were prepared to insure accurate stoichiometric ratios.

A CD<sub>3</sub>CN (0.6 mL) solution containing cyclopropenimine hydrochloride (0.03 mmol, 0.05 M, 1.0 equiv) and tBu-P<sub>1</sub>(pyrr) (0.03 mmol, 0.05 M, 1.0 equiv) was prepared and allowed to mix for 15 minutes before obtaining an <sup>1</sup>H NMR spectrum (this spectrum did not change over the course of 4 hours). Using the observed chemical shifts of the tBu-P<sub>1</sub>(pyrr), the ratio of tBu-P<sub>1</sub>(pyrr) to tBu-P<sub>1</sub>(pyrr)•HCl, and thus the ratio of CpIm•HCl to CpIm, could be determined. Representative observed chemical shifts of tBu-P<sub>1</sub>(pyrr) for these experiments are listed above. Using the equations shown above, with the known pK<sub>BH+</sub> of tBu-P<sub>1</sub>(pyrr) (28.41 in MeCN),<sup>5</sup> an estimated pK<sub>a</sub> for the cyclopropenimine hydrochloride salt was determined. Each experiment was ran in triplicate and the

<sup>5</sup> Kaljurand, I.; Ku□tt, A.; Sooväli, L.; Rodima, T.; Mäemets, V.; Leito, I.; Koppel, I. A. *J. Org.Chem.* **2005**, *70*, 1019.

calculated  $K$  and  $pK_a$  values are shown above. Example  $^1\text{H}$  NMR spectra are provided below.

### Solvent effect on Glycinate-Michael Additions (Table 1).

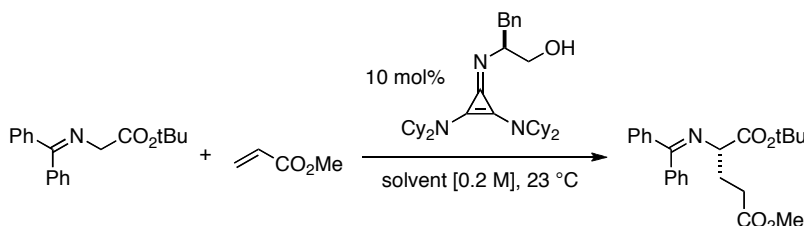

| entry | solvent                               | $\epsilon$ | time (h) | yield (%) | ee (%) |
|-------|---------------------------------------|------------|----------|-----------|--------|
| 1     | 1,4-dioxane                           | 2.3        | 8        | 95        | 98     |
| 2     | PhMe                                  | 2.4        | 5        | 95        | 99     |
| 3     | $\text{NEt}_3$                        | 2.4        | 6        | 95        | 99     |
| 4     | $\text{Et}_2\text{O}$                 | 4.3        | 2        | 95        | 98     |
| 5     | $\text{EtOAc}$                        | 6.0        | 2        | 95        | 98     |
| 6     | THF                                   | 7.5        | 24       | 86        | 89     |
| 7     | $\text{CH}_2\text{Cl}_2$              | 9.1        | 10       | 95        | 86     |
| 8     | 1,2- $\text{F}_2\text{C}_6\text{H}_4$ | 14.3       | 4        | 95        | 89     |
| 9     | nBuOH                                 | 17.5       | 24       | 45        | 55     |
| 10    | acetone                               | 21         | 1.5      | 95        | 80     |

Cyclopropenimine (9.2 mg, 0.0169 mmol, 0.1 equiv) and *tert*-butyl glycinate benzophenone Schiff base (50 mg, 0.169 mmol, 1.0 equiv) were dissolved in solvent (0.85 mL, 0.20 M). Methyl acrylate (46  $\mu\text{L}$ , 0.508 mmol, 3.0 equiv) was then added to the vial and the reaction solution was stirred at room temperature. The reaction was monitored by  $^1\text{H}$  NMR spectroscopy and conversion was determined by comparing *tert*-butyl integrals of the starting material and product. Upon 95% conversion, or after 24 hr if not complete, the reaction solution was concentrated and the crude material subjected to silica gel column chromatography (1/5  $\text{Et}_2\text{O}$ /Hexanes) to yield pure product. Enantioselectivities were determined via chiral HPLC: Chiralpak AD-H (Hex/IPA = 97/3, 1.0 mL/min, 254 nm, 23°C), 6.1 min (minor), 6.7 min (major).

### General Procedure for Glycinate-Michael Additions with Unsubstituted Acceptors (Table 2).

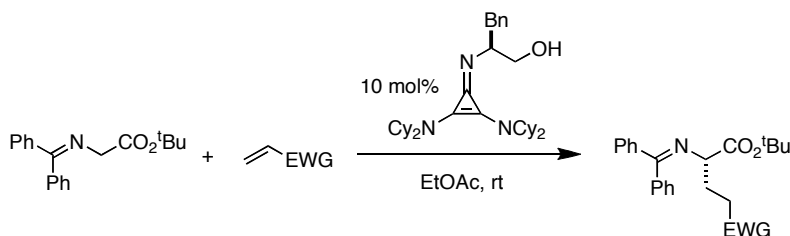

Cyclopropenimine **1** (3.6 mg, 0.00677 mmol, 0.1 equiv) and *tert*-butyl glycinate benzophenone Schiff base (20 mg, 0.0677 mmol, 1.0 equiv) were dissolved in ethyl



acetate (0.2 mL). Michael-acceptor (0.203 mmol, 3.0 equiv) was then added to the vial and the reaction solution was stirred at room temperature. Upon complete consumption of starting material, monitored by  $^1\text{H}$  NMR spectroscopy, the reaction solution was concentrated and the crude material subjected to silica gel column chromatography (1/4  $\text{Et}_2\text{O}$ /Hexanes eluent).

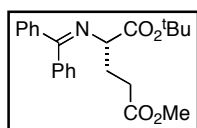

**(S)-1-tert-Butyl-5-methyl 2-(diphenylmethylenamino)pentanedioate (12a).**<sup>6</sup> Isolated as a colorless oil (26 mg, 100% yield).  $^1\text{H}$  NMR (400 MHz,  $\text{CDCl}_3$ )  $\delta$  7.64 (d, 7.2 Hz, 2H, ArH), 7.14-7.45 (m, 8H, ArH), 3.97 (t, 6.4 Hz,  $\text{HCCO}_2^t\text{Bu}$ ), 3.59 (s, 3H,  $\text{CO}_2\text{CH}_3$ ), 2.35-2.45 (m, 2H,  $-\text{CH}_2-$ ), 2.15-2.25 (m, 2H,  $-\text{CH}_2-$ ), 1.44 (s, 9H,  $\text{C}(\text{CH}_3)_3$ );  $^{13}\text{C}$  NMR (100 MHz,  $\text{CDCl}_3$ )  $\delta$  173.7, 170.9, 170.8, 139.6, 136.6, 130.4, 128.9, 128.7, 128.6, 128.1, 127.9, 81.3, 64.9, 51.6, 30.6, 28.8, 28.2. HPLC analysis: Chiralpak AD-H (Hex/IPA = 97/3, 1.0 mL/min, 254 nm, 23°C), 6.1 min (minor), 6.7 min (major), 98% ee.

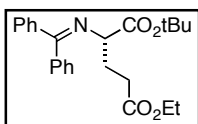

**(S)-1-tert-Butyl 5-ethyl 2-(diphenylmethylenamino)pentanedioate (Table 2, entry 1).**<sup>6</sup> Reaction performed on a 0.169 mmol scale of *tert*-butyl glycinate benzophenone Schiff base. The title product was isolated as a colorless oil (64 mg, 0.162 mmol, 96% yield).  $^1\text{H}$  NMR (400 MHz,  $\text{CDCl}_3$ )  $\delta$  7.64 (d,  $J = 7.1$  Hz, 2H, ArH), 7.48-7.30 (m, 6H, ArH), 7.19 (dd,  $J = 3.0$  and 4.3 Hz, 2H, ArH), 4.05 (t,  $J = 7.1$  Hz, 2H,  $\text{CO}_2\text{CH}_2\text{CH}_3$ ), 3.96 (t,  $J = 6.0$  Hz, 1H,  $\text{HCCO}_2^t\text{Bu}$ ), 2.35 (m, 2H,  $\text{CH}_2$ ), 2.22 (m, 2H,  $\text{CH}_2$ ), 1.44 (s, 9H,  $\text{C}(\text{CH}_3)_3$ ), 1.19 (t,  $J = 7.1$  Hz, 3H,  $\text{CO}_2\text{CH}_2\text{CH}_3$ ).  $^{13}\text{C}$  NMR (100 MHz,  $\text{CDCl}_3$ )  $\delta$  173.3, 170.9, 170.7, 139.6, 136.6, 130.4, 128.9, 128.7, 128.6, 128.1, 127.9, 81.3, 65.0, 60.4, 30.9, 28.8, 28.2, 14.3. HPLC analysis: Chiralpak AD-H (Hex/IPA = 97/3, 1.0 mL/min, 254 nm, 23°C), 5.2 min (minor), 5.6 min (major), 99% ee.

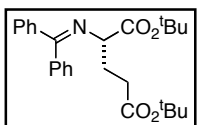

**(S)-di-tert-Butyl 2-(diphenylmethylenamino)pentanedioate<sup>9</sup> (Table 2, entry 2):** Isolated as a colorless oil (28 mg, 98% yield).  $^1\text{H}$  NMR (400 MHz,  $\text{CDCl}_3$ )  $\delta$  7.65 (d, 7.2 Hz, ArH), 7.30-7.50 (m, 6H, ArH), 7.20 (m, 2H, ArH), 3.95 (t, 5.6 Hz, 1H,  $\text{HCCO}_2^t\text{Bu}$ ), 2.15-2.30 (m, 4H,  $-\text{CH}_2\text{CH}_2-$ ), 1.44 (s, 9H,  $\text{C}(\text{CH}_3)_3$ ), 1.39 (s, 9H,  $\text{C}(\text{CH}_3)_3$ );  $^{13}\text{C}$  NMR (100 MHz,  $\text{CDCl}_3$ )  $\delta$  172.6, 171.0, 170.7, 139.7, 136.7, 130.4, 128.9, 128.7, 128.6, 128.1, 128.0, 81.2, 80.3, 65.1, 32.1, 29.0, 28.2. HPLC analysis: Chiralpak AD-H (Hex/IPA = 98/2, 0.6 mL/min, 254 nm, 23°C), 9.0 min (minor), 9.6 min (major), 99% ee.

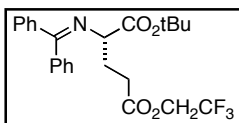

**(S)-1-tert-Butyl 5-(2,2,2-trifluoroethyl) 2-(diphenylmethylenamino)pentanedioate (Table 2, entry 3).**

<sup>6</sup> Ma, T.; Fu, X.; Kee, W. K.; Zong, L.; Pan, Y.; Huang, K.W.; Tan, C.H. *J. Am. Chem. Soc.* **2011**, *133*, 2828-2831.

Reaction performed on a 0.169 mmol scale of *tert*-butyl glycinate benzophenone Schiff base. The title product was isolated as a colorless oil (68 mg, 0.151 mmol, 90% yield). <sup>1</sup>H NMR (400 MHz, CDCl<sub>3</sub>) δ 7.62 (d, J = 7.1 Hz, 2H, ArH), 7.45-7.25 (m, 6H, ArH), 7.17 (m, 2H, ArH), 4.34 (m, 2H, CO<sub>2</sub>CH<sub>2</sub>CF<sub>3</sub>), 3.99 (dd, J = 5.0 and 7.3 Hz, 1H, CHCO<sub>2</sub>R), 2.49 (m, 2H, -CH<sub>2</sub>-), 2.24 (m, 2H, -CH<sub>2</sub>-), 1.44 (s, 9H, C(CH<sub>3</sub>)<sub>3</sub>). <sup>13</sup>C NMR (125 MHz, CDCl<sub>3</sub>) δ 171.7, 171.0, 170.6, 139.5, 136.5, 130.6, 128.9, 128.8, 128.2, 127.9, 81.5, 64.7, 60.4 (q), 30.2, 28.5, 28.2. <sup>19</sup>F NMR (470 MHz, CDCl<sub>3</sub>) δ 72.8 ppm (s, 3F). IR (thin film, cm<sup>-1</sup>) 2977, 2936, 1757, 1733, 1627, 1368, 1280, 1143, 973, 693. [α]<sub>D</sub><sup>20</sup> = -40.0 (1.0 c, CHCl<sub>3</sub>). HRMS (FAB+) m/z = 450.1883; calcd for C<sub>24</sub>H<sub>26</sub>F<sub>3</sub>NO<sub>4</sub>[M+1]<sup>+</sup> 450.1814. HPLC analysis: Chiralpak OD-H (Hex/IPA = 98.5/1.5, 1.0 mL/min, 254 nm, 23°C), 5.9 min (major), 7.2 min (minor), 58% ee.

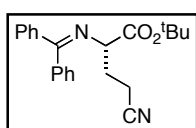

**(*S*)-*tert*-Butyl 4-cyano-2-(diphenylmethyleneamino)butanoate**<sup>7</sup>

(Table 2, entry 4): Obtained as a pale yellow oil (23 mg, 98% yield). <sup>1</sup>H NMR (400 MHz, CDCl<sub>3</sub>) δ 7.66 (m, 2H, ArH), 7.30-7.50 (m, 6H, ArH), 7.20 (m, 2H, ArH), 4.05 (m, 1H, HCCO<sub>2</sub><sup>t</sup>Bu), 2.20-2.50 (m, 4H, -CH<sub>2</sub>CH<sub>2</sub>-), 1.44 (s, 9H, C(CH<sub>3</sub>)<sub>3</sub>); <sup>13</sup>C NMR (100 MHz, CDCl<sub>3</sub>) δ 172.1, 170.0, 139.2, 136.1, 130.7, 129.0, 128.9, 128.7, 128.2, 127.5, 119.5, 81.9, 63.8, 29.5, 28.1, 13.9. HPLC analysis: Chiralpak AD-H (Hex/IPA = 98/2, 1.0 mL/min, 254 nm, 23°C), 9.3 min (minor), 11.7 min (major), 77% ee.

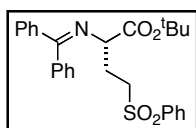

**(*S*)-*tert*-Butyl 2-(diphenylmethyleneamino)-4-(phenylsulfonyl)butanoate**<sup>8</sup>

(Table 2, entry 5): Isolated with phenyl vinyl sulfone starting material (88% yield based on benzyl ether standard). <sup>1</sup>H NMR (400 MHz, CDCl<sub>3</sub>) δ 7.90 (m, 2H, ArH), 7.50-7.70 (m, 5H, ArH), 7.30-7.45 (m, 6H, ArH), 7.10 (m, 2H, ArH), 4.00 (m, 1H, HCCO<sub>2</sub><sup>t</sup>Bu), 3.10-3.35 (m, 2H, CH<sub>2</sub>SO<sub>2</sub>Ph), 2.10-2.30 (m, 2H, CH<sub>2</sub>CH<sub>2</sub>SO<sub>2</sub>Ph), 1.37 (s, 9H, C(CH<sub>3</sub>)<sub>3</sub>); <sup>13</sup>C NMR (100 MHz, CDCl<sub>3</sub>) δ 171.5, 169.9, 139.1, 139.0, 136.1, 130.7, 129.4, 128.9, 128.9, 128.7, 128.2, 128.1, 127.7, 81.8, 63.6, 52.9, 28.0, 27.1. HPLC analysis: Chiralpak AD-H (Hex/IPA = 95/5, 1.0 mL/min, 254 nm, 23°C), 12.9 min (minor), 16.8 min (major), 41% ee.

**General Procedure for Glycinate-Michael Additions with Substituted Acceptors (Table 3).**

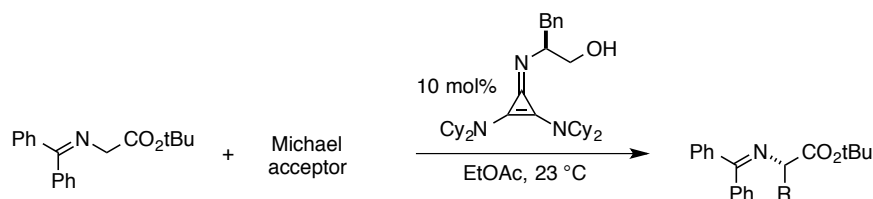

<sup>7</sup> Zhang, F. Y.; Corey, E. J.; *Org. Lett.* **2000**, 2, 1097-1100.

<sup>8</sup> Tsubogo, T.; Saito, S.; Seki, K.; Yamashita, Y.; Kobayashi, S. *J. Am. Chem. Soc.* **2008**, 130, 13321-13332.

Cyclopropenimine (9.2 mg, 0.0169 mmol, 0.1 equiv) and *tert*-butyl glycinate benzophenone Schiff base (50 mg, 0.169 mmol, 1.0 equiv) were dissolved in ethyl acetate (0.48 mL, 0.35 M). Michael-acceptor (0.508 mmol, 3.0 equiv) was then added to the vial and the reaction solution was stirred at room temperature. Upon complete consumption of starting material, monitored by <sup>1</sup>H NMR spectroscopy, the reaction solution was concentrated and the crude material subjected to silica gel column chromatography (Et<sub>2</sub>O/Hexanes eluent as noted). Selectivities were determined via chiral HPLC as noted. Directly below the characterization of these substrates is a list of Michael acceptors that failed to give appreciable yield.

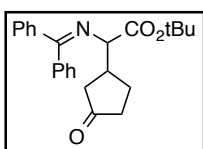

***tert*-Butyl**

**2-(diphenylmethyleneamino)-2-(3-oxocyclopentyl)ethanoate (Table 3, entry 1).** The general procedure was followed using 2-cyclopentenone (43 μL, 0.508 mmol, 3.0 equiv) as the Michael acceptor. After 48 hr the reaction mixture was purified by silica gel column chromatography (1/6 → 1/4 Et<sub>2</sub>O/Hexanes) to yield

the title product as a white solid as a mixture of diastereomers (56 mg, 0.148 mmol, 88% yield). <sup>1</sup>H NMR (500 MHz, CDCl<sub>3</sub>) δ 7.62 (m, 2H, ArH), 7.45-7.31 (m, 6H, ArH), 7.15 (m, 2H, ArH), 4.00 (d, J = 5.0 Hz, 1H, minor NCHCO<sub>2</sub>tBu), 3.92 (d, J = 6.5 Hz, 1H, major NCHCO<sub>2</sub>tBu), 2.92 (m, 1H, β-CH), 2.31 (m, 2H, -CH<sub>2</sub>-), 2.17 (m, 2H, -CH<sub>2</sub>-), 1.93 (m, 2H, -CH<sub>2</sub>-), 1.45 (s, 9H, major C(CH<sub>3</sub>)<sub>3</sub>), 1.44 (s, 9H, minor C(CH<sub>3</sub>)<sub>3</sub>). <sup>13</sup>C NMR (125 MHz, CDCl<sub>3</sub>) δ 171.4, 171.0\*, 170.4, 170.3\*, 139.4, 136.6, 130.6, 130.6\*, 128.9, 128.8, 128.7, 128.2, 127.9, 81.6, 81.5\*, 77.4, 69.1, 68.5\*, 42.2, 41.0\*, 40.3\*, 40.1, 38.3, 28.2, 26.4\*, 25.5 (\* denotes minor diastereomer where observable). IR (thin film, cm<sup>-1</sup>) 2964, 1743, 1723, 1627, 1283, 1222, 1143, 697. [α]<sup>20</sup><sub>D</sub> = -7.5 (1.0 c, CHCl<sub>3</sub>). HRMS (FAB+) m/z = 378.2063; calcd for C<sub>24</sub>H<sub>27</sub>NO<sub>3</sub> [M+1]<sup>+</sup> 378.1991. HPLC analysis: Chiralpak AD-H (Hex/EtOH = 98/2, 1.0 mL/min, 254 nm, 23°C), 7.3 min (minor diastereomer), 7.8 min (major diastereomer), 8.3 (major diastereomer), 9.5 (minor diastereomer), 78:22 dr, 4% ee major diastereomer, 30% ee minor diastereomer.

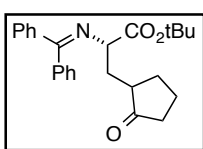

**(2*S*)-*tert*-Butyl**

**2-(diphenylmethyleneamino)-3-(2-oxocyclopentyl)propanoate (Table 3, entry 2).** The general procedure was followed using *tert*-butyl glycinate benzophenone Schiff base (25 mg, 0.0846 mmol, 1.0 equiv) and 2-methylenecyclopentanone (24.4 mg, 0.254 mmol, 3.0 equiv) as the Michael acceptor. After 45 min the reaction mixture was purified by silica gel column chromatography (1/4 Et<sub>2</sub>O/Hexanes) to yield the title product as a clear oil as a 1:1 mixture of diastereomers (33.0 mg, 0.0843 mmol, 100% yield). <sup>1</sup>H NMR (400 MHz, CDCl<sub>3</sub>) δ 7.64 (m, 2H, ArH), 7.45-7.30 (m, 6H, ArH), 7.18 (m, 2H, ArH), 4.13 (dd, J = 5.6 and 7.4 Hz, 1H, NCHCO<sub>2</sub>tBu), \*3.97 (dd, J = 4.4 and 8.8 Hz, 1H, NCHCO<sub>2</sub>tBu), 2.50 (m, 1H, CHC=O), \*2.40 (m, 1H, CHC=O), 2.30-1.60 (m, 8H, 4 x -CH<sub>2</sub>-), 1.44 (s, 9H, C(CH<sub>3</sub>)<sub>3</sub>), \*1.43 (s, 9H, major C(CH<sub>3</sub>)<sub>3</sub>); \*denotes diastereomer where observable. <sup>13</sup>C NMR (100 MHz, CDCl<sub>3</sub>) δ 171.4, 171.3, 170.5, 170.4, 139.7, 139.6, 136.7, 136.6, 130.4, 130.4, 128.9, 128.9, 128.8, 128.7, 128.5, 128.1, 127.9, 127.8, 81.2, 81.2, 64.6, 64.1, 46.6, 37.9, 37.8, 34.0, 33.9, 30.6, 29.8, 28.1, 20.9, 20.8. (IR (thin film, cm<sup>-1</sup>) 2970, 1733, 1661, 1600, 1276, 1153, 697, 638. [α]<sup>20</sup><sub>D</sub> = -86.0 (0.5 c, CHCl<sub>3</sub>). HRMS (FAB+) m/z = 392.2224; calcd for C<sub>25</sub>H<sub>29</sub>NO<sub>3</sub> [M+1]<sup>+</sup> 392.2147.

HPLC analysis: Chiralpak AD-H (Hex/IPA = 96/4, 1.0 mL/min, 254 nm, 23°C), 7.1 min (minor), 8.1 min (minor), 8.9 min (major), 9.9 min (major), 94 and 95% ee for the two diastereomers.

### Enolates other than *tert*-butyl glycinate benzophenone imine (Equation 5).

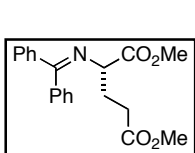

#### **(S)-Dimethyl 2-(diphenylmethyleneamino)pentanedioate (19).**<sup>9</sup>

Cyclopropenimine (11.0 mg, 0.0197 mmol, 0.1 equiv) and methyl glycinate benzophenone imine (50 mg, 0.197 mmol, 1.0 equiv) were dissolved in ethyl acetate (0.56 mL, 0.35 M). Methyl acrylate (54.0  $\mu$ L, 0.592 mmol, 3.0 equiv) was then added to the vial and the reaction solution was stirred at room temperature. After 45 min the reaction mixture was purified by silica gel column chromatography (1/4 Et<sub>2</sub>O/Hexanes) to yield the title product as a colorless oil (67 mg, 0.197 mmol, 100% yield). <sup>1</sup>H NMR (400 MHz, CDCl<sub>3</sub>)  $\delta$  7.63 (d, J = 7.1 Hz, 2H, ArH), 7.46-7.32 (m, 6H, ArH), 7.18 (m, 2H, ArH), 4.13 (t, J = 6.3 Hz, 1H, NCHCO<sub>2</sub>Me), 3.71 (s, 3H, CO<sub>2</sub>CH<sub>3</sub>), 3.58 (s, 3H, CO<sub>2</sub>CH<sub>3</sub>), 2.38-2.35 (m, 2H, -CH<sub>2</sub>-), 2.26-2.22 (m, 2H, -CH<sub>2</sub>-). <sup>13</sup>C NMR (100 MHz, CDCl<sub>3</sub>)  $\delta$  173.4, 172.2, 171.3, 139.4, 136.2, 130.6, 129.0, 128.9, 128.7, 128.2, 127.9, 64.2, 52.3, 51.6, 30.5, 28.7. HPLC analysis: Chiralpak OD-H (Hex/IPA = 97/3, 1.0 mL/min, 254 nm, 23°C), 9.6 min (minor), 11.1 min (major), 96% ee.

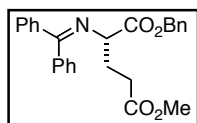

#### **(S)-1-Benzyl 5-methyl 2-(diphenylmethyleneamino)pentanedioate (20).**<sup>10</sup>

Cyclopropenimine (8.3 mg, 0.0152 mmol, 0.1 equiv) and benzyl glycinate benzophenone imine (50 mg, 0.152 mmol, 1.0 equiv) were dissolved in ethyl acetate (0.43 mL, 0.35 M). Methyl acrylate (41.0  $\mu$ L, 0.455 mmol, 3.0 equiv) was then added to the vial and the reaction solution was stirred at room temperature. After 45 min the reaction mixture was purified by silica gel column chromatography (1/3 Et<sub>2</sub>O/Hexanes) to yield the title product as a colorless oil (62 mg, 0.149 mmol, 98% yield). <sup>1</sup>H NMR (400 MHz, CDCl<sub>3</sub>)  $\delta$  7.65 (d, J = 7.2 Hz, 2H, ArH), 7.40-7.31 (m, 11H, ArH), 7.11 (m, 2H, ArH), 5.15 (two d, J = 12.4 Hz, 2H, CH<sub>2</sub>Ph), 4.16 (t, J = 6.3 Hz, 1H, NCHCO<sub>2</sub>Bn), 3.58 (s, 3H, CO<sub>2</sub>CH<sub>3</sub>), 2.38-2.35 (m, 2H, -CH<sub>2</sub>-), 2.30-2.25 (m, 2H, -CH<sub>2</sub>-). <sup>13</sup>C NMR (100 MHz, CDCl<sub>3</sub>)  $\delta$  173.5, 171.5, 139.4, 136.2, 135.9, 130.6, 129.0, 128.8, 128.6, 128.3, 128.2, 128.2, 127.9, 66.7, 64.3, 51.6, 30.5, 28.6. IR (thin film, cm<sup>-1</sup>) 3028, 2947, 1736, 1624, 1443, 1256, 1160, 1256, 1078, 700. LRMS (APCI+) m/z = 417.26; calcd for C<sub>26</sub>H<sub>25</sub>NO<sub>4</sub> [M+]<sup>+</sup> 416.18. HPLC analysis: Chiralpak OD-H (Hex/IPA = 97/3, 1.0 mL/min, 254 nm, 23°C), 11.7 min (minor), 12.4 min (major), 97% ee.

<sup>9</sup> Saito, S.; Tsubogo, T.; Kobayashi, S. *J. Am. Chem. Soc.* **2007**, *129*, 5364.

<sup>10</sup> Shibuguchi, T.; Mihara, H.; Kuramochi, A.; Sakuraba, S.; Ohshima, T.; Shibasaki, M. *Angew. Chem. Int. Ed.* **2006**, *45*, 4635.

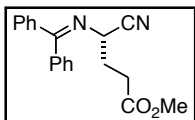

**(S)-Methyl 4-cyano-4-(diphenylmethyleneamino)butanoate (21).**

Cyclopropenimine (24.8 mg, 0.0454 mmol, 0.1 equiv) and 2-(diphenylmethyleneamino)ethanenitrile (100 mg, 0.454 mmol, 1.0 equiv) were dissolved in ethyl acetate (1.30 mL, 0.35 M). Methyl acrylate (123  $\mu$ L, 1.36 mmol, 3.0 equiv) was then added to the vial and the reaction solution was stirred at room temperature. After 15 min the reaction mixture was purified by silica gel column chromatography (1/4 Et<sub>2</sub>O/Hexanes) to yield the title product as a colorless oil (135 mg, 0.441 mmol, 97% yield). <sup>1</sup>H NMR (400 MHz, CDCl<sub>3</sub>)  $\delta$  7.65 (m, 2H, ArH), 7.52-7.42 (m, 4H, ArH), 7.35 (t, J = 7.8 Hz, 2H, ArH), 7.20 (dd, J = 2.7 and 7.7 Hz, 2H, ArH), 4.35 (t, J = 6.4 Hz, 1H, CHCN), 3.61 (s, 3H, CO<sub>2</sub>CH<sub>3</sub>), 2.60-2.51 (m, 2H, -CH<sub>2</sub>-), 2.24-2.22 (m, 2H, -CH<sub>2</sub>-). <sup>13</sup>C NMR (100 MHz, CDCl<sub>3</sub>)  $\delta$  173.8, 172.6, 138.3, 135.1, 131.4, 129.5, 129.1, 128.3, 127.4, 119.1, 51.9, 51.8, 30.0, 29.9. IR (thin film, cm<sup>-1</sup>) 3066, 2953, 1726, 1624, 1443, 1215, 1153, 731, 697. [ $\alpha$ ]<sub>D</sub><sup>20</sup> = -28.4 (1.0 c, CHCl<sub>3</sub>). HRMS (FAB+) m/z = 307.1444; calcd for C<sub>19</sub>H<sub>18</sub>N<sub>2</sub>O<sub>2</sub> [M+1]<sup>+</sup> 307.1368. HPLC analysis: Chiralpak OD-H (Hex/IPA = 98.5/1.5, 0.7 mL/min, 254 nm, 23°C), 19.3 min (minor), 20.2 min (major), 10% ee.

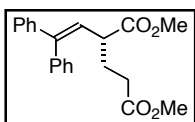

**(R)-Dimethyl 2-(2,2-diphenylvinyl)pentanedioate (22).**

Cyclopropenimine (54 mg, 0.099 mmol, 0.1 equiv) and methyl 4,4-diphenylbut-3-enoate (250 mg, 0.99 mmol, 1.0 equiv) were dissolved in ethyl acetate (2.8 mL, 0.35 M). Methyl acrylate (270  $\mu$ L, 2.97 mmol, 3.0 equiv) was then added to the vial and the reaction solution was stirred at room temperature. After 48 hr the reaction mixture was purified by silica gel column chromatography (1/9 Et<sub>2</sub>O/Hexanes) to yield the title product as a colorless oil (37 mg, 0.109 mmol, 11% yield). Unreacted starting material methyl 4,4-diphenylbut-3-enoate was also isolated (195 mg, 0.77 mmol, 78% recovery). <sup>1</sup>H NMR (500 MHz, CDCl<sub>3</sub>)  $\delta$  7.48-7.19 (m, 10H, ArH), 6.02 (d, J = 10.5 Hz, 1H, C=CH), 3.70 (s, 3H, CO<sub>2</sub>CH<sub>3</sub>), 3.57 (s, 3H, CO<sub>2</sub>CH<sub>3</sub>), 3.25 (m, 1H, C=CHCHCO<sub>2</sub>Me), 2.28 (m, 2H, CH<sub>2</sub>CO<sub>2</sub>Me), 2.07 and 1.94 (m, 2H, -CH<sub>2</sub>-). <sup>13</sup>C NMR (125 MHz, CDCl<sub>3</sub>)  $\delta$  117.2, 173.3, 145.2, 141.7, 139.2, 129.9, 128.5, 128.3, 127.7, 127.6, 127.5, 125.5, 52.1, 51.7, 31.5, 27.9. IR (thin film, cm<sup>-1</sup>) 2950, 1733, 1494, 1440, 1205, 1157, 765, 700. [ $\alpha$ ]<sub>D</sub><sup>20</sup> = -141.4 (0.5 c, CHCl<sub>3</sub>). LRMS (APCI+) m/z = 339.25; calcd for C<sub>21</sub>H<sub>21</sub>O<sub>4</sub> [M+1]<sup>+</sup> 338.14. HPLC analysis: Chiralpak OD-H (Hex/IPA = 98/2, 0.8 mL/min, 254 nm, 23°C), 10.5 min (minor), 11.1 min (major), 71% ee.

**General Procedure for Glycinate-Michael Additions with Substituted Acceptors (Table 6).**

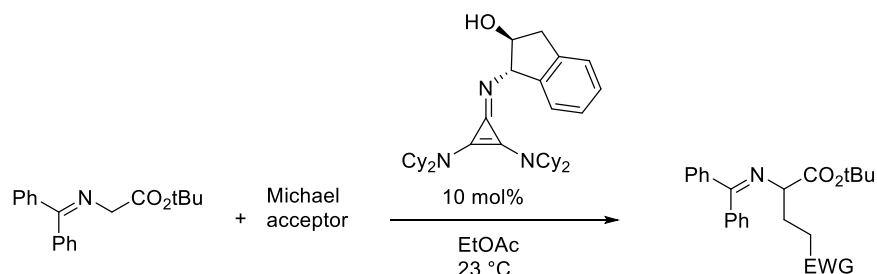

Cyclopropenimine (9.2 mg, 0.0169 mmol, 0.1 equiv) and *tert*-butyl glycinate benzophenone Schiff base (50 mg, 0.169 mmol, 1.0 equiv) were dissolved in ethyl acetate (0.48 mL, 0.35 M). Michael-acceptor (0.508 mmol, 3.0 equiv) was then added to the vial and the reaction solution was stirred at room temperature. Upon complete consumption of starting material, monitored by  $^1\text{H}$  NMR spectroscopy, the reaction solution was concentrated and the crude material subjected to silica gel column chromatography ( $\text{Et}_2\text{O}$ /Hexanes eluent as noted). Selectivities were determined via chiral HPLC as noted. Directly below the characterization of these substrates is a list of Michael acceptors that failed to give appreciable yield.

**(1*S*,2*S*)-1-*tert*-Butyl 2,3-dimethyl 1-(diphenylmethyleamino)propane-1,2,3-tricarboxylate (Table 6, entry 1).** The general procedure was followed using dimethyl fumarate (73 mg, 0.508 mmol, 3.0 equiv) as the Michael acceptor.

After 2.5 hr the reaction mixture was purified by silica gel column chromatography (1/10  $\rightarrow$  1/4  $\text{Et}_2\text{O}$ /Hexanes) to yield the title product as a clear oil (70 mg, 0.159 mmol, 94% yield).  $^1\text{H}$  NMR (500 MHz,  $\text{CDCl}_3$ )  $\delta$  7.60 (m, 2H, ArH), 7.45-7.31 (m, 6H, ArH), 7.15 (m, 2H, ArH), 4.42 (d,  $J = 5.0$  Hz, 1H,  $\text{NCHCO}_2\text{tBu}$ ), 3.65 (s, 3H,  $\text{CO}_2\text{CH}_3$ ), 3.63 (m, 1H,  $\text{CHCO}_2\text{Me}$ ), 3.60 (s, 3H,  $\text{CO}_2\text{CH}_3$ ), 3.10 (dd,  $J = 9.6$  and 17.0 Hz, 1H,  $\text{CHCO}_2\text{Me}$ ), 2.68 (dd,  $J = 3.9$  and 17.0 Hz, 1H,  $\text{CHCO}_2\text{Me}$ ), 1.44 (s, 9H,  $\text{C}(\text{CH}_3)_3$ );  $^{13}\text{C}$  NMR (125 MHz,  $\text{CDCl}_3$ )  $\delta$  172.9, 172.7, 172.2, 169.3, 139.4, 136.1, 130.6, 129.1, 128.9, 128.4, 128.1, 128.0, 82.1, 66.2, 52.1, 51.9, 44.7, 32.4, 28.1. IR (thin film,  $\text{cm}^{-1}$ ) 2977, 2950, 1733, 1624, 1443, 1222, 1150, 697.  $[\alpha]_{\text{D}}^{20} = -96.5$  (1.0 c,  $\text{CHCl}_3$ ). HRMS (FAB+)  $m/z = 440.2073$ ; calcd for  $\text{C}_{25}\text{H}_{29}\text{NO}_6$   $[\text{M}+1]^+$  440.1995. HPLC analysis: Chiralpak AD-H ( $\text{Hex}/\text{IPA} = 98/2$ , 1.0 mL/min, 254 nm, 23°C), 12.4 min (minor), 25.9 min (major), 96% ee.

**(2*S*,3*R*)-*tert*-Butyl 2-(diphenylmethyleamino)-5-oxo-3-phenylhexanoate (Table 6, entry 3).**<sup>6</sup> The general procedure was followed using benzylideneacetone (73 mg, 0.508 mmol, 3.0 equiv) as the Michael acceptor. After 7 hr the reaction mixture was purified by silica gel column chromatography (1/20  $\rightarrow$  1/4  $\text{Et}_2\text{O}$ /Hexanes) to yield the title product as a white solid (74 mg, 0.169 mmol, quantitative yield).  $^1\text{H}$  NMR (400 MHz,  $\text{CDCl}_3$ )  $\delta$  7.66 (m, 2H, ArH),

7.35-7.10 (m, 11H, ArH), 6.70 (d, J = 7.0 Hz, 2H, ArH), 4.05 (d, J = 7.0 Hz, 1H, NCHCO<sub>2</sub>tBu), 3.98 (m, 1H, PhCH), 3.15-3.01 (m, 1H, CH<sub>2</sub>COMe), 2.07 (s, 3H, CH<sub>3</sub>), 1.31 (s, 9H, C(CH<sub>3</sub>)<sub>3</sub>); <sup>13</sup>C NMR (125 MHz, CDCl<sub>3</sub>) δ 207.5, 171.2, 170.0, 141.3, 139.4, 136.3, 130.5, 128.9, 128.7, 128.5, 128.3, 128.3, 128.1, 127.6, 126.8, 81.4, 70.9, 45.4, 44.7, 30.4, 28.0. IR (thin film, cm<sup>-1</sup>) 2981, 1719, 1621, 1361, 1147, 697. LRMS (APCI+) m/z = 442.20; calcd for C<sub>29</sub>H<sub>31</sub>NO<sub>3</sub> [M+1]<sup>+</sup> 442.23. HPLC analysis: Chiralpak AD-H (Hex/IPA = 95/5, 1.0 mL/min, 254 nm, 23°C), 6.4 min (minor), 8.1 min (major), 91% ee.

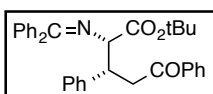

**(2S,3R)-tert-Butyl 2-(diphenylmethyleamino)-5-oxo-3,5-diphenylpentanoate (Table 6, entry 4).**<sup>6</sup> The general procedure was

followed on a slightly smaller scale using cyclopropenimine (3.6 mg, 0.00677 mmol, 0.1 equiv), *tert*-butyl glycinate benzophenone Schiff base (20 mg, 0.0677 mmol, 1.0 equiv) and *trans*-chalcone (42, 0.203 mmol, 3.0 equiv) in ethyl acetate (0.20 mL, 0.35 M). After 1.5 hr the reaction mixture was purified by silica gel column chromatography (1/9 → 1/4 Et<sub>2</sub>O/Hexanes) to yield the title product as a clear oil (85 mg, 0.169 mmol, quantitative yield). <sup>1</sup>H NMR (400 MHz, CDCl<sub>3</sub>) δ 8.00 (d, 7.2 Hz, 2H, ArH), 7.70 (d, 7.2 Hz, 2H, ArH), 7.30-7.60 (m, 9H, ArH), 7.10-7.20 (m, 5H, ArH), 6.70 (m, 2H, ArH), 4.20 (m, 2H, NCHCO<sub>2</sub><sup>t</sup>Bu, CHPh), 3.60-3.80 (m, 2H, CH<sub>2</sub>COPh), 1.33 (s, 9H, C(CH<sub>3</sub>)<sub>3</sub>); <sup>13</sup>C NMR (125 MHz, CDCl<sub>3</sub>) δ 198.8, 171.2, 170.1, 141.5, 139.5, 137.3, 136.4, 132.9, 130.4, 129.0, 128.7, 128.6, 128.5, 128.3, 128.3, 128.2, 128.1, 127.6, 126.7, 81.4, 44.9, 40.1, 28.0. HPLC analysis: Chiralpak AD-H (Hex/IPA = 95/5, 1.0 mL/min, 254 nm, 23°C), 8.8 min (minor), 11.0 min (major), 96% ee.

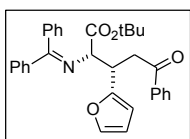

**tert-butyl (2S,3S)-2-((diphenylmethylene)amino)-3-(furan-2-yl)-5-oxo-5-phenylpentanoate (Table 6, entry 5).** The general procedure was

followed using (*E*)-3-(furan-2-yl)-1-phenylprop-2-en-1-one<sup>11</sup> (101 mg, 0.508 mmol, 3.0 equiv) as the Michael acceptor. After 7 hr the reaction mixture was purified by silica gel column chromatography (1/10 Et<sub>2</sub>O/Hexanes) to yield the title product as a clear oil (83 mg, 0.167 mmol, 99%). <sup>1</sup>H NMR (300 MHz, CDCl<sub>3</sub>) δ 8.04 (d, J = 5.2 Hz, 2H, ArH), 7.68 (d, J = 8.4 Hz, 2H, ArH), 7.64-7.30 (m, 10H, ArH), 7.21 (m, 1H, ArH), 6.93 (m, 1H, ArH), 6.21 (m, 1H, ArH), 6.00 (d J = 3.2 Hz, 1H, ArH), 4.35 (m, 2H, CHCHCH<sub>2</sub>COPh), 3.78 (m, 1H, CH<sub>a</sub>COPh), 3.58 (m, 1H, CH<sub>b</sub>COPh), 1.41 (s, 9H, C(CH<sub>3</sub>)<sub>3</sub>). <sup>13</sup>C NMR (125 MHz, CDCl<sub>3</sub>) 198.3, 171.5, 169.8, 154.9, 145.0, 139.6, 137.1, 136.3, 132.9, 130.3, 128.9, 128.5, 128.3, 128.2, 128.0, 127.7, 110.2, 106.5, 81.5, 68.71, 38.46, 27.97. IR (thin film, cm<sup>-1</sup>) 1729, 1658, 1447, 1277, 11150, 756, 701. LRMS (APCI+) m/z = 494.26; calcd for C<sub>30</sub>H<sub>40</sub>NO<sub>6</sub> [M]<sup>+</sup> 494.23. HPLC analysis: Chiralpak AD-H (Hex/IPA = 95/5, 1.0 mL/min, 254 nm, 23°C), 5.5 min (minor diastereomer), 6.1 (minor diastereomer), 9.0 (major diastereomer) 10.3 min (major diastereomer), 20:1 dr, 96% ee major diastereoisomer. Note: other diastereomer are visible in HPLC trace and account for <5% of the material.

<sup>11</sup> Songbay, L.; Liebskind, L.; *J. Am. Chem. Soc.* **2008**, 130, 6918.

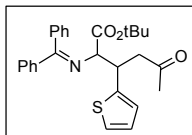

**tert-butyl 2-((diphenylmethylene)amino)-5-oxo-3-(thiophen-2-yl)hexanoate (Table 6, entry 6).**

The general procedure was followed using (*E*)-4-(thiophen-2-yl)but-3-en-2-one<sup>12</sup> (77 mg, 0.508 mmol, 3.0 equiv) as the Michael acceptor. After 22 hr the reaction mixture was purified by silica gel column chromatography (1/20 → 1/4 Et<sub>2</sub>O/Hexanes) to yield the title product as a yellow oil (71 mg, 0.159 mmol, 94%). <sup>1</sup>H NMR (400 MHz, CDCl<sub>3</sub>) δ 7.70 (m, 2H, ArH), 7.45-7.30 (m, 6H, ArH), 7.10 (dd, J = 1.2 Hz and 5.2 Hz, 1H, ArH), 6.89-6.79 ((m, 4H, ArH), 4.33 (m, 1H, CH<sub>3</sub>COCH), 4.13 (d, J = 4.0 Hz, 1H, NCHCO<sub>2</sub>tBu), 3.24 (dd, J = 9.6 Hz and 16.8 Hz, 1H, COCHCH<sub>a</sub>), 3.12 (dd, J = 8.0 Hz and 16.8 Hz, 1H, COCHCH<sub>b</sub>), 2.15 (s, 3H, CH<sub>3</sub>CO), 1.40 (s, 9H, C(CH<sub>3</sub>)<sub>3</sub>). <sup>13</sup>C NMR (125 MHz, CDCl<sub>3</sub>) δ 206.9, 171.7, 169.6, 144.76, 139.4, 136.3, 130.4, 1289.0, 128.4, 128.2, 128.0, 127.5, 126.4, 125.2, 123.9, 81.6, 70.7, 46.5, 39.8, 30.4, 27.9. IR (thin film, cm<sup>-1</sup>) 1726, 1624, 1445, 1367, 1283, 1149, 754, 697. LRMS (APCI+) m/z = 448.67; calcd for C<sub>27</sub>H<sub>30</sub>NO<sub>3</sub>S [M+1]<sup>+</sup> 448.60. HPLC analysis: Chiralpak AD-H (Hex/IPA = 95/5, 1.0 mL/min, 254 nm, 23°C), 6.1 min (major diastereomer), 7.4 (major diastereomer), 8.7 (minor diastereomer) 9.9 min (minor diastereomer), >20:1 dr, 88% ee major diastereoisomer. Note: other diastereomer are visible in HPLC trace and account for <5% of the material.

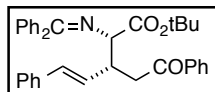

**(2*S*,3*R*,*E*)-tert-Butyl 2-(diphenylmethyleneamino)-3-(2-oxo-2-phenylethyl)-5-phenylpent-4-enoate (Table 6, entry 7).**

The general procedure was followed using (*2E,4E*)-1,5-diphenylpenta-2,4-dien-1-one<sup>13</sup> (119 mg, 0.508 mmol, 3.0 equiv) as the Michael acceptor. After 8 hr the reaction mixture was purified by silica gel column chromatography (1/9 Et<sub>2</sub>O/Hexanes) to yield the title product as a white solid (56 mg, 0.106 mmol, 63% yield). <sup>1</sup>H NMR (500 MHz, CDCl<sub>3</sub>) δ 7.98 (d, J = 7.4 Hz, 2H, ArH), 7.70 (d, J = 7.3 Hz, 2H, ArH), 7.40 (t, J = 7.5 Hz, 1H, ArH), 7.50-7.32 (m, 8H, ArH), 7.21 (d, J = 4.3 Hz, 2H, ArH), 7.15 (m, 3H, ArH), 6.35 (d, J = 15.9 Hz, 1H, C=CHPh), 6.03 (dd, J = 8.6 and 15.9 Hz, 1H, HC=CHPh), 4.12 (d, J = 5.7 Hz, 1H, NCHCO<sub>2</sub>tBu), 3.71 (m, 1H, HCC=C), 3.42-3.33 (m, 2H, -CH<sub>2</sub>-), 1.38 (s, 9H, C(CH<sub>3</sub>)<sub>3</sub>). <sup>13</sup>C NMR (125 MHz, CDCl<sub>3</sub>) δ 199.1, 171.4, 170.3, 139.6, 137.4, 137.3, 136.6, 133.0, 132.0, 130.6, 129.8, 129.0, 128.7, 128.7, 128.5, 128.4, 128.2, 128.0, 127.3, 126.3, 81.5, 69.9, 43.2, 40.4, 28.2. IR (thin film, cm<sup>-1</sup>) 2977, 1726, 1685, 1447, 1283, 1147, 969, 751, 693. [α]<sub>D</sub><sup>20</sup> = -28.8 (1.0 c, CHCl<sub>3</sub>). HRMS (FAB+) m/z = 530.2679; calcd for C<sub>36</sub>H<sub>35</sub>NO<sub>3</sub> [M+1]<sup>+</sup> 530.2617. HPLC analysis: Chiralpak OD-H (Hex/EtOH = 97/3, 1.0 mL/min, 254 nm, 23°C), 4.9 min (minor), 6.1 min (major), 92% ee. Employing the same procedure with cyclopropenimine **23**, the isolated in a 45% yield (41 mg, 76 μmol) and the ee obtained was 94%.

Note: other diastereomer and regioisomer are visible in HPLC trace and account for <5% of the material.

<sup>12</sup> Le P.Q.; *Org. Lett.* **2012**, *14*, 6105.

<sup>13</sup> Batovska, D.; Parushev, S.; Stamboliyska, B.; Tsvetkova, I.; Ninova, M.; Najdenski, H. *Eur. J. Med. Chem.* **2009**, *44*, 2211.



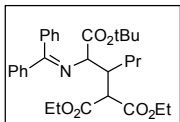

**3-(tert-butyl) 1,1-diethyl 3-((diphenylmethylene)amino)-2-propylpropane-1,1,3-tricarboxylate (Table 6, Entry 8).**

The general procedure was followed using 3-(tert-butyl) 1,1-diethyl 3-((diphenylmethylene)amino)-2-propylpropane-1,1,3-tricarboxylate<sup>14</sup> (108 mg, 0.508 mmol, 3.0 equiv) as the Michael acceptor. After 22 hr the reaction mixture was purified by silica gel column chromatography (1/20 → 1/4 Et<sub>2</sub>O/Hexanes) to yield the title product as a yellow oil (89 mg, 0.169 mmol, quantitative yield). A 9:1 diastereomeric ratio was determined on the crude proton NMR. <sup>1</sup>H NMR (300 MHz, CDCl<sub>3</sub>) δ 7.65 (m, 2H, ArH), 7.48-7.30 (m, 6H, ArH), 7.15 (m, 2H, ArH), 4.20 (m, 4H, O-CH<sub>2</sub>CH<sub>3</sub>), 4.03 (d, J = 4.0 Hz, 1H, HC-(CO<sub>2</sub>Et)<sub>2</sub>), 3.90 (d, J = 8.0 Hz, 1H, NCHCO<sub>2</sub>tBu major diastereoisomer), 3.72 (d, J = 8.0 Hz, 1H, NCHCO<sub>2</sub>tBu minor diastereoisomer), 2.96 (m, 1H, CH-CH-Pr), 1.45 (s, 9H, C(CH<sub>3</sub>)<sub>3</sub>), 1.26 (m, 4H, CHCH<sub>2</sub>CH<sub>2</sub>CH<sub>3</sub>), 0.84 (t, J = 7.2, CH<sub>2</sub>CH<sub>2</sub>CH<sub>3</sub>). <sup>13</sup>C NMR (125 MHz, CDCl<sub>3</sub>) 170.6, 169.4, 169.0, 139.5, 136.5, 130.2, 129.0, 128.5, 128.3, 127.8, 127.7, 81.3, 66.7, 61.20, 60.9, 53.2, 42.2, 31.7, 28.0, 20.8, 14.0. IR (thin film, cm<sup>-1</sup>) 1728, 1624, 1446, 1368, 1149, 755, 689. LRMS (APCI+) m/z = 510.76; calcd for C<sub>30</sub>H<sub>40</sub>NO<sub>6</sub> [M+1]<sup>+</sup> 510.65. HPLC analysis: Chiralpak AD-H (Hex/IPA = 98/2, 1.0 mL/min, 254 nm, 23°C), 5.5 min (minor diastereomer), 6.9 (minor diastereomer), 7.4 (major diastereomer) 8.0 min (major diastereomer), 9:1 dr, 95% ee minor diastereoisomer (minor enantiomer not detected) 92% ee major diastereoisomer.

<sup>14</sup> Rousseau, O.; Delaunay, T, Robiette, R. *Synlett*. **2014**, 25, 519.

### Michael acceptors with <10% conversion in 72 hr:

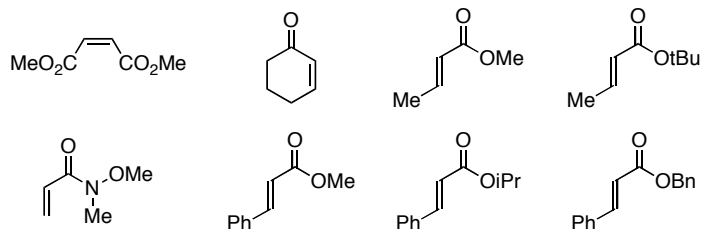

### Cyclopropenimine decomposition study (Table 4).

**Decomposition as a solid at room temperature rate study:** Freshly obtained cyclopropenimine was placed in a vial (250 mg per vial) and stored at room temperature. At each time point, a small amount of the solid was removed and its  $^1\text{H}$  NMR ( $\text{CDCl}_3$ ) was used to measure the ratio of cyclopropenimine to the rearranged product. The time required for 50% of the cyclopropenimine to rearrange is noted as the half-life. For iminoindanol catalyst **36**, no decomposition was noted over a three-month period.

**Decomposition in solution rate study:** Freshly obtained cyclopropenimine (0.028 mmol) was dissolved in  $d_8$ -toluene (0.8 mL, 0.035 M) containing benzyl ether standard (0.007 mmol). This concentration is identical to that of cyclopropenimine in cyclopropenimine-catalyzed Michael reactions. At each time point,  $^1\text{H}$  NMR was used to measure the ratio of cyclopropenimine to benzyl ether standard. The time required for 50% of the cyclopropenimine to decompose is noted as the half-life.

The rates of decomposition were found to be identical when *tert*-butyl glycinate benzophenone Schiff base (82.7 mg, 0.280 mmol, 10 equiv relative to cyclopropenimine) was included in the  $d_8$ -toluene solution.

| entry | catalyst                                                                                                                                                            | conditions                                                                | $t_{1/2}$                   |
|-------|---------------------------------------------------------------------------------------------------------------------------------------------------------------------|---------------------------------------------------------------------------|-----------------------------|
| 1     | 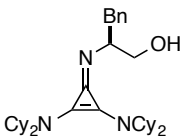<br><chem>C1=CC(NC1)N(C)N(C)C(O)CCc2ccccc2</chem><br><b>1</b>                      | (a) solid, rt<br>(b) solid -20 °C<br>(c) HCl salt, rt<br>(d) 0.035 M PhMe | 15 d<br>8 mo<br>>5 y<br>7 h |
| 2     | <br><chem>C1=CC(NC1)N(C)N(C)C(O)CC(C)C</chem><br><b>30</b>                         | solid, rt                                                                 | 16 h                        |
| 3     | <br><chem>C1=CC(NC1)N(C)N(C)C(O)CC</chem><br><b>29</b>                             | solid, rt                                                                 | 5 mo                        |
| 4     | <br><chem>C1=CC(NC1)N(C)N(C)C(O)CC[C@@H]2C[C@H](O)C3=CC=CC=C23</chem><br><b>36</b> | (a) solid, rt<br>(b) 0.035 M                                              | >5 y<br>36 h                |
| 5     | <br><chem>C1=CC(NC1)N(C(C)C)N(C(C)C)C(O)CCc2ccccc2</chem><br><b>23</b>            | (a) solid, rt<br>(b) 0.035 M                                              | 12 h<br>3 h                 |

### Comparison of one-month-old catalysts.

After storing deprotonated cyclopropenimine catalysts **1** and **36** as solids (200 mg each) at 23 °C for one month in a desiccator their activity was reassessed as follows. Cyclopropenimine decomposition solid (9.2 mg, originally 0.0169 mmol, 0.1 equiv; note: mmol and equiv correspond to value of cyclopropenimine prior to decomposition) and *tert*-butyl glycinate benzophenone Schiff base (50 mg, 0.169 mmol, 1.0 equiv) were dissolved in ethyl acetate (0.48 mL, 0.35 M). Methyl acrylate (54  $\mu$ L, 0.508 mmol, 3.0 equiv) was then added to the vial and the reaction solution was stirred at room temperature. The reaction was monitored by  $^1\text{H}$  NMR spectroscopy and conversion was determined by comparing *tert*-butyl integrals of the starting material and product. Upon 95% conversion, or after 24 hr if not complete, the reaction solution was concentrated and the crude material subjected to silica gel column chromatography (1/5 Et<sub>2</sub>O/Hexanes) to yield pure product. Enantiomeric excesses were determined via chiral HPLC: Chiralpak AD-H (Hex/IPA = 97/3, 1.0 mL/min, 254 nm, 23°C), 6.1 min (minor), 6.7 min (major).

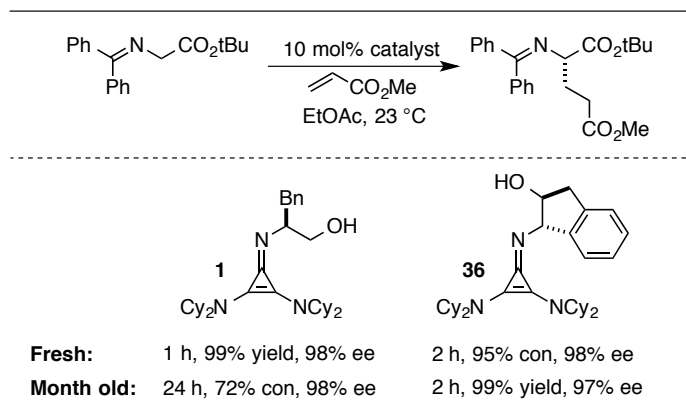

### Product racemization test.

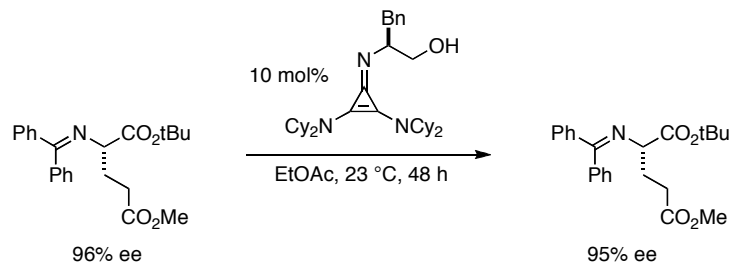

Michael adduct **12a** (50 mg, 0.131 mmol, 1.0 equiv) and cyclopropenimine **1** (7.2 mg, 0.0131 mmol, 0.1 equiv) were dissolved in ethyl acetate (0.37 mL, 0.35 M). The reaction solution was stirred for 48 hr at room temperature after which time the Michael adduct was reisolated via silica gel column chromatography (1/5 Et<sub>2</sub>O/Hexanes eluent). Enantiomeric excesses were determined via chiral HPLC: Chiralpak AD-H (Hex/IPA = 97/3, 1.0 mL/min, 254 nm, 23°C), 6.1 min (minor), 6.7 min (major). Original sample: 96% ee; reisolated sample: 95% ee.

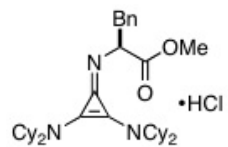

8.85  
8.82

7.46  
7.46  
7.44  
7.29  
7.28  
7.27  
7.26  
7.25  
7.21  
7.20

4.48  
4.47  
4.46  
4.45  
4.44  
4.43  
3.97  
3.95  
3.94  
3.92  
3.81  
3.46  
3.45  
3.42  
3.41  
3.31  
3.29  
3.28  
3.27  
3.26  
3.25

1.89  
1.86  
1.85  
1.72  
1.71  
1.69  
1.66  
1.65  
1.52  
1.34  
1.32  
1.29

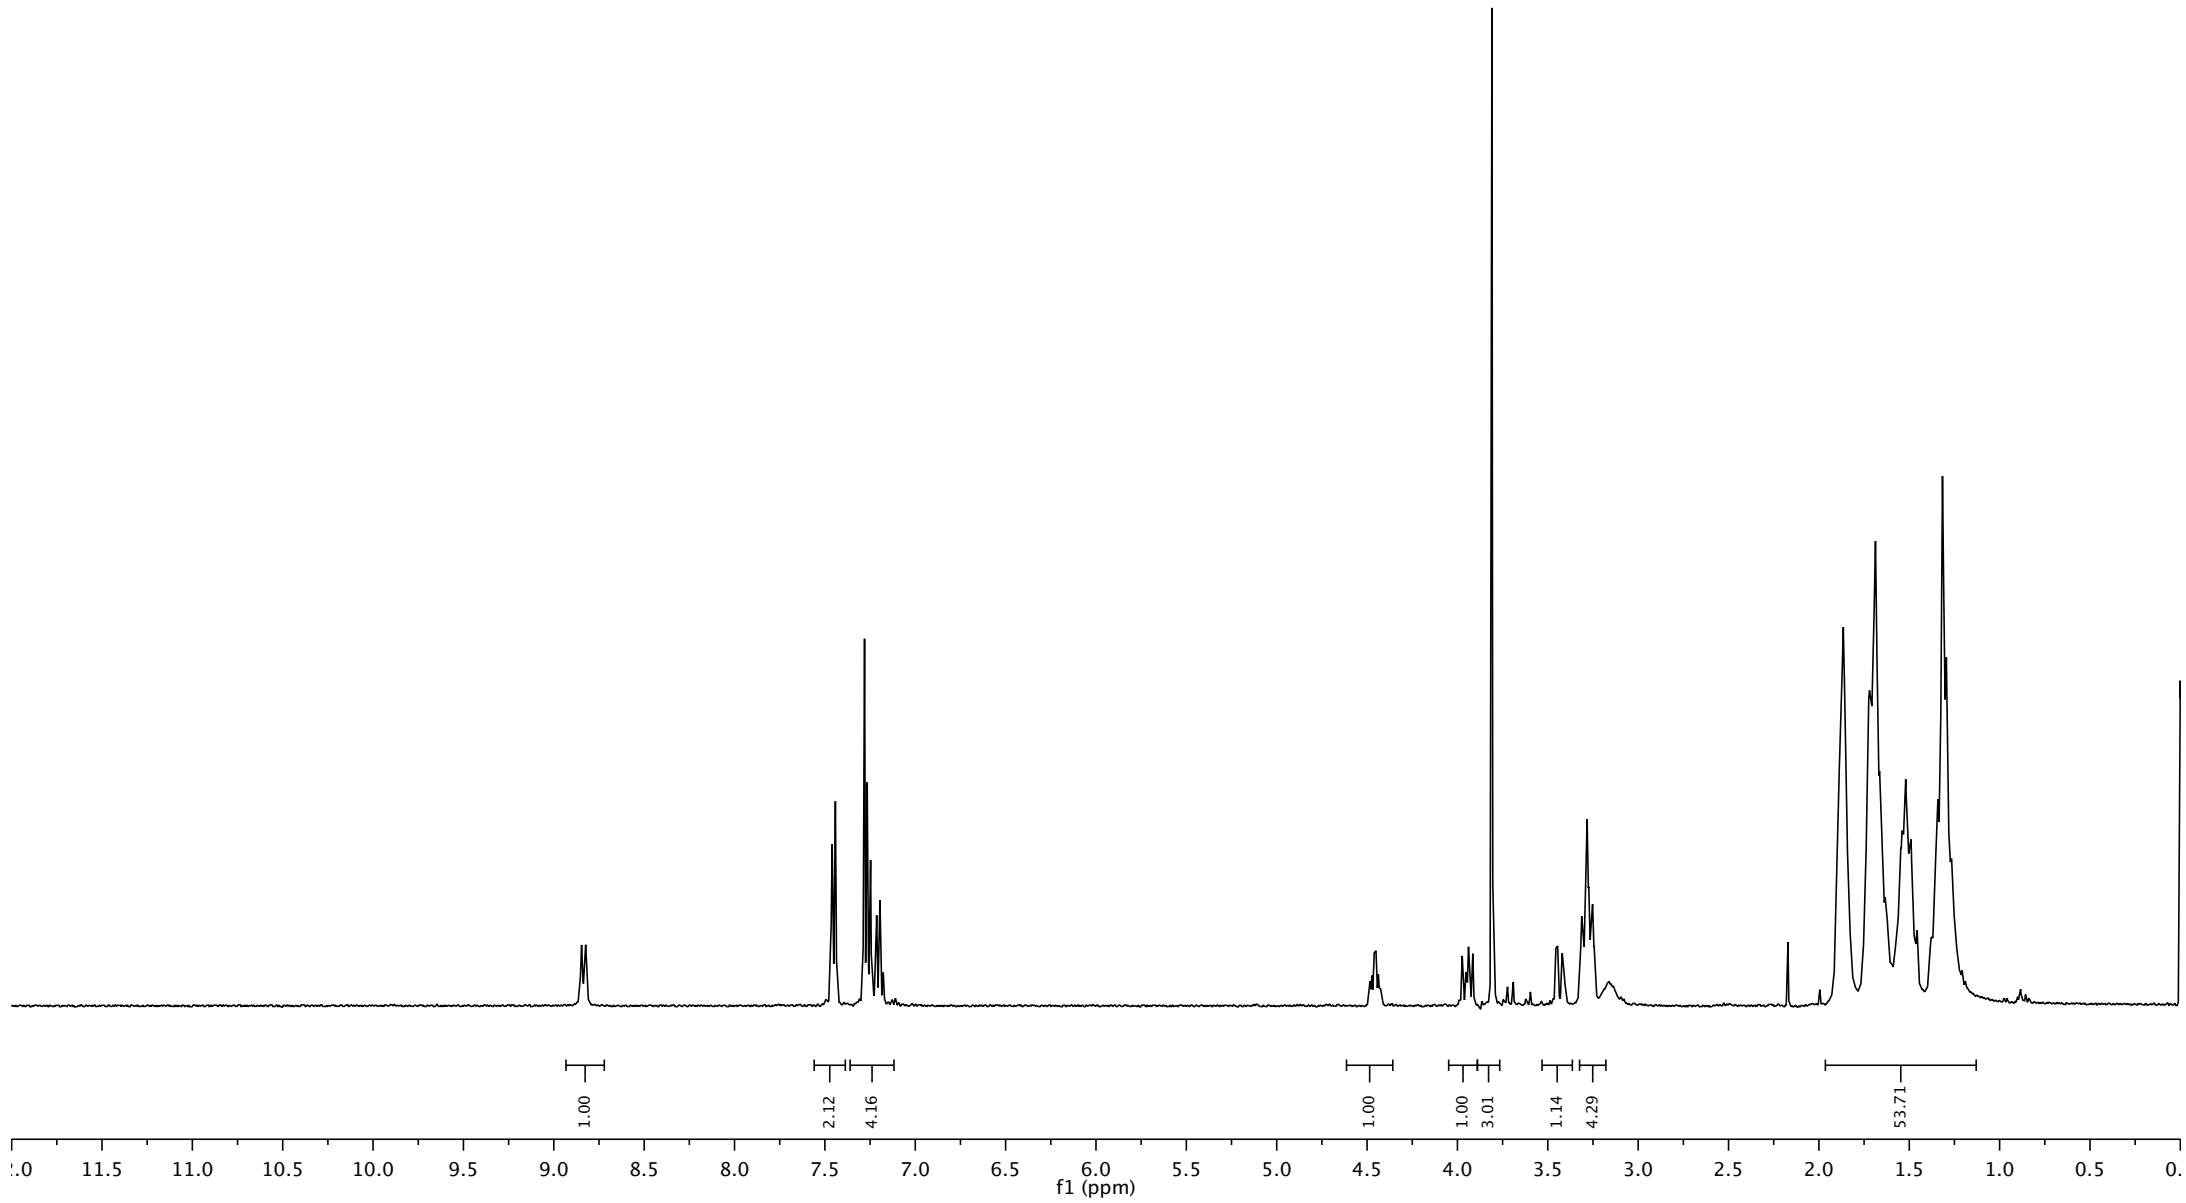

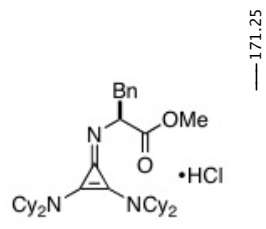

171.25

137.08

129.59

128.28

126.73

115.93

115.45

77.48 CDCl3

77.16 CDCl3

76.84 CDCl3

61.15

59.50

52.71

37.01

32.64

32.04

32.00

25.97

25.52

25.48

24.90

24.45

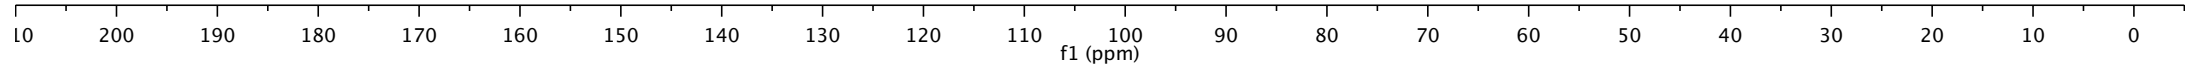

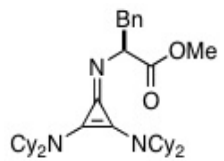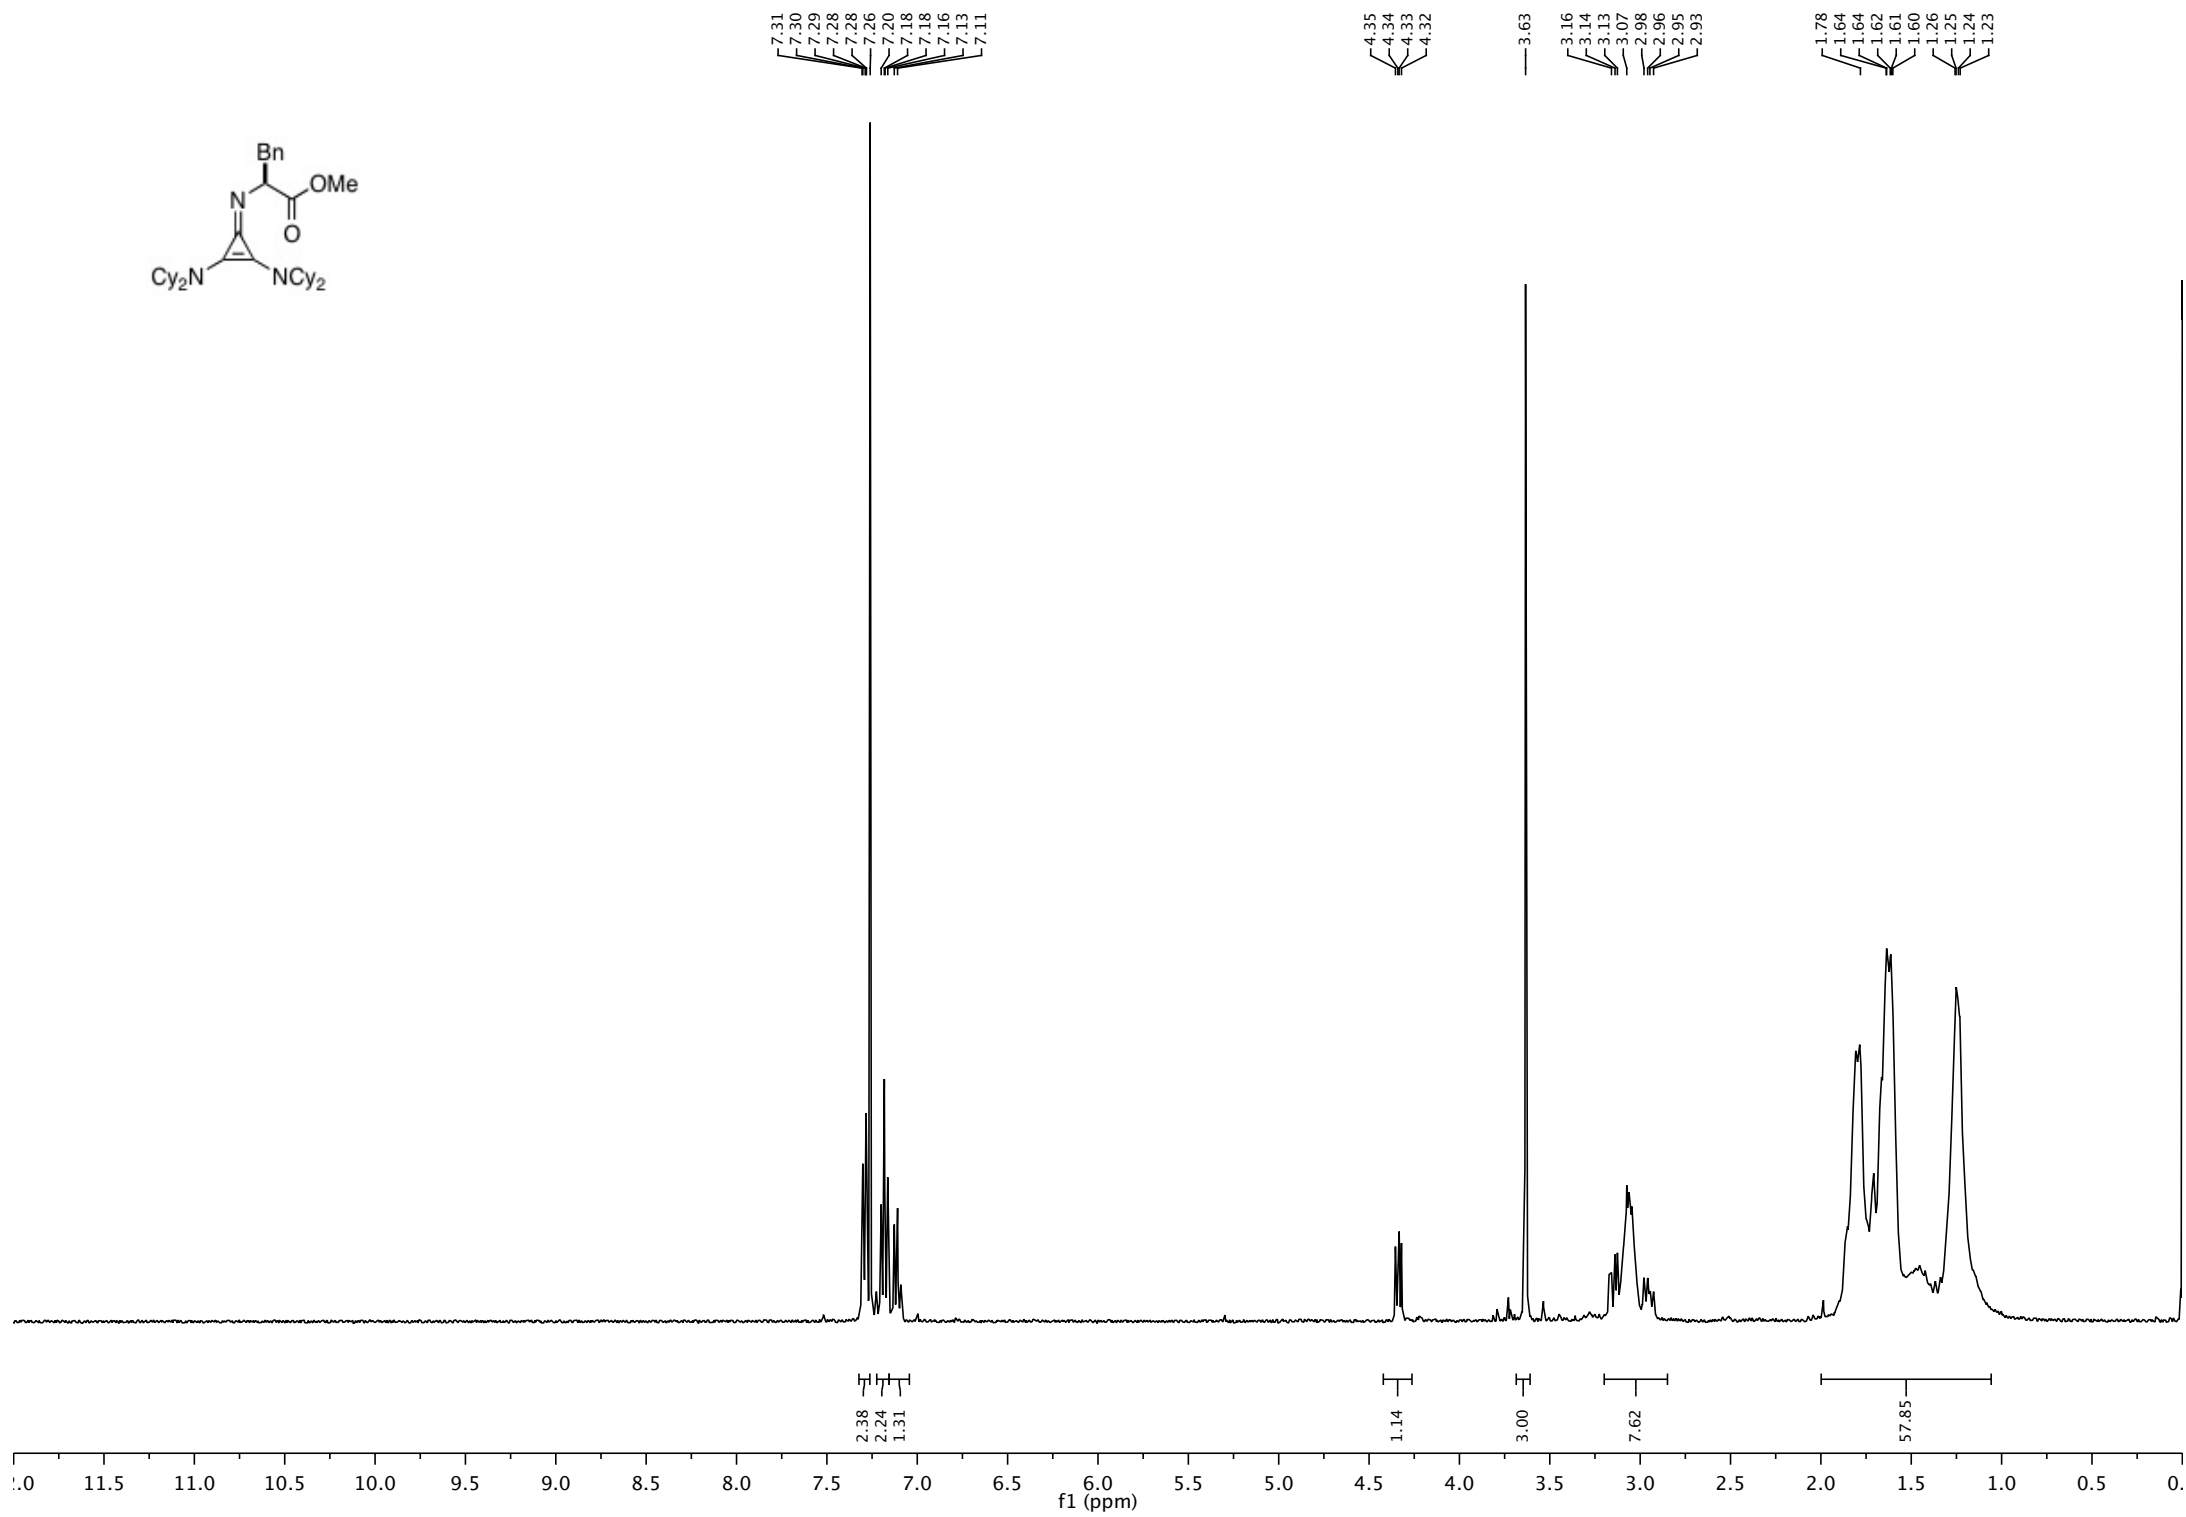

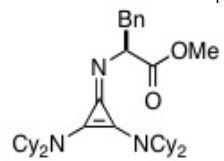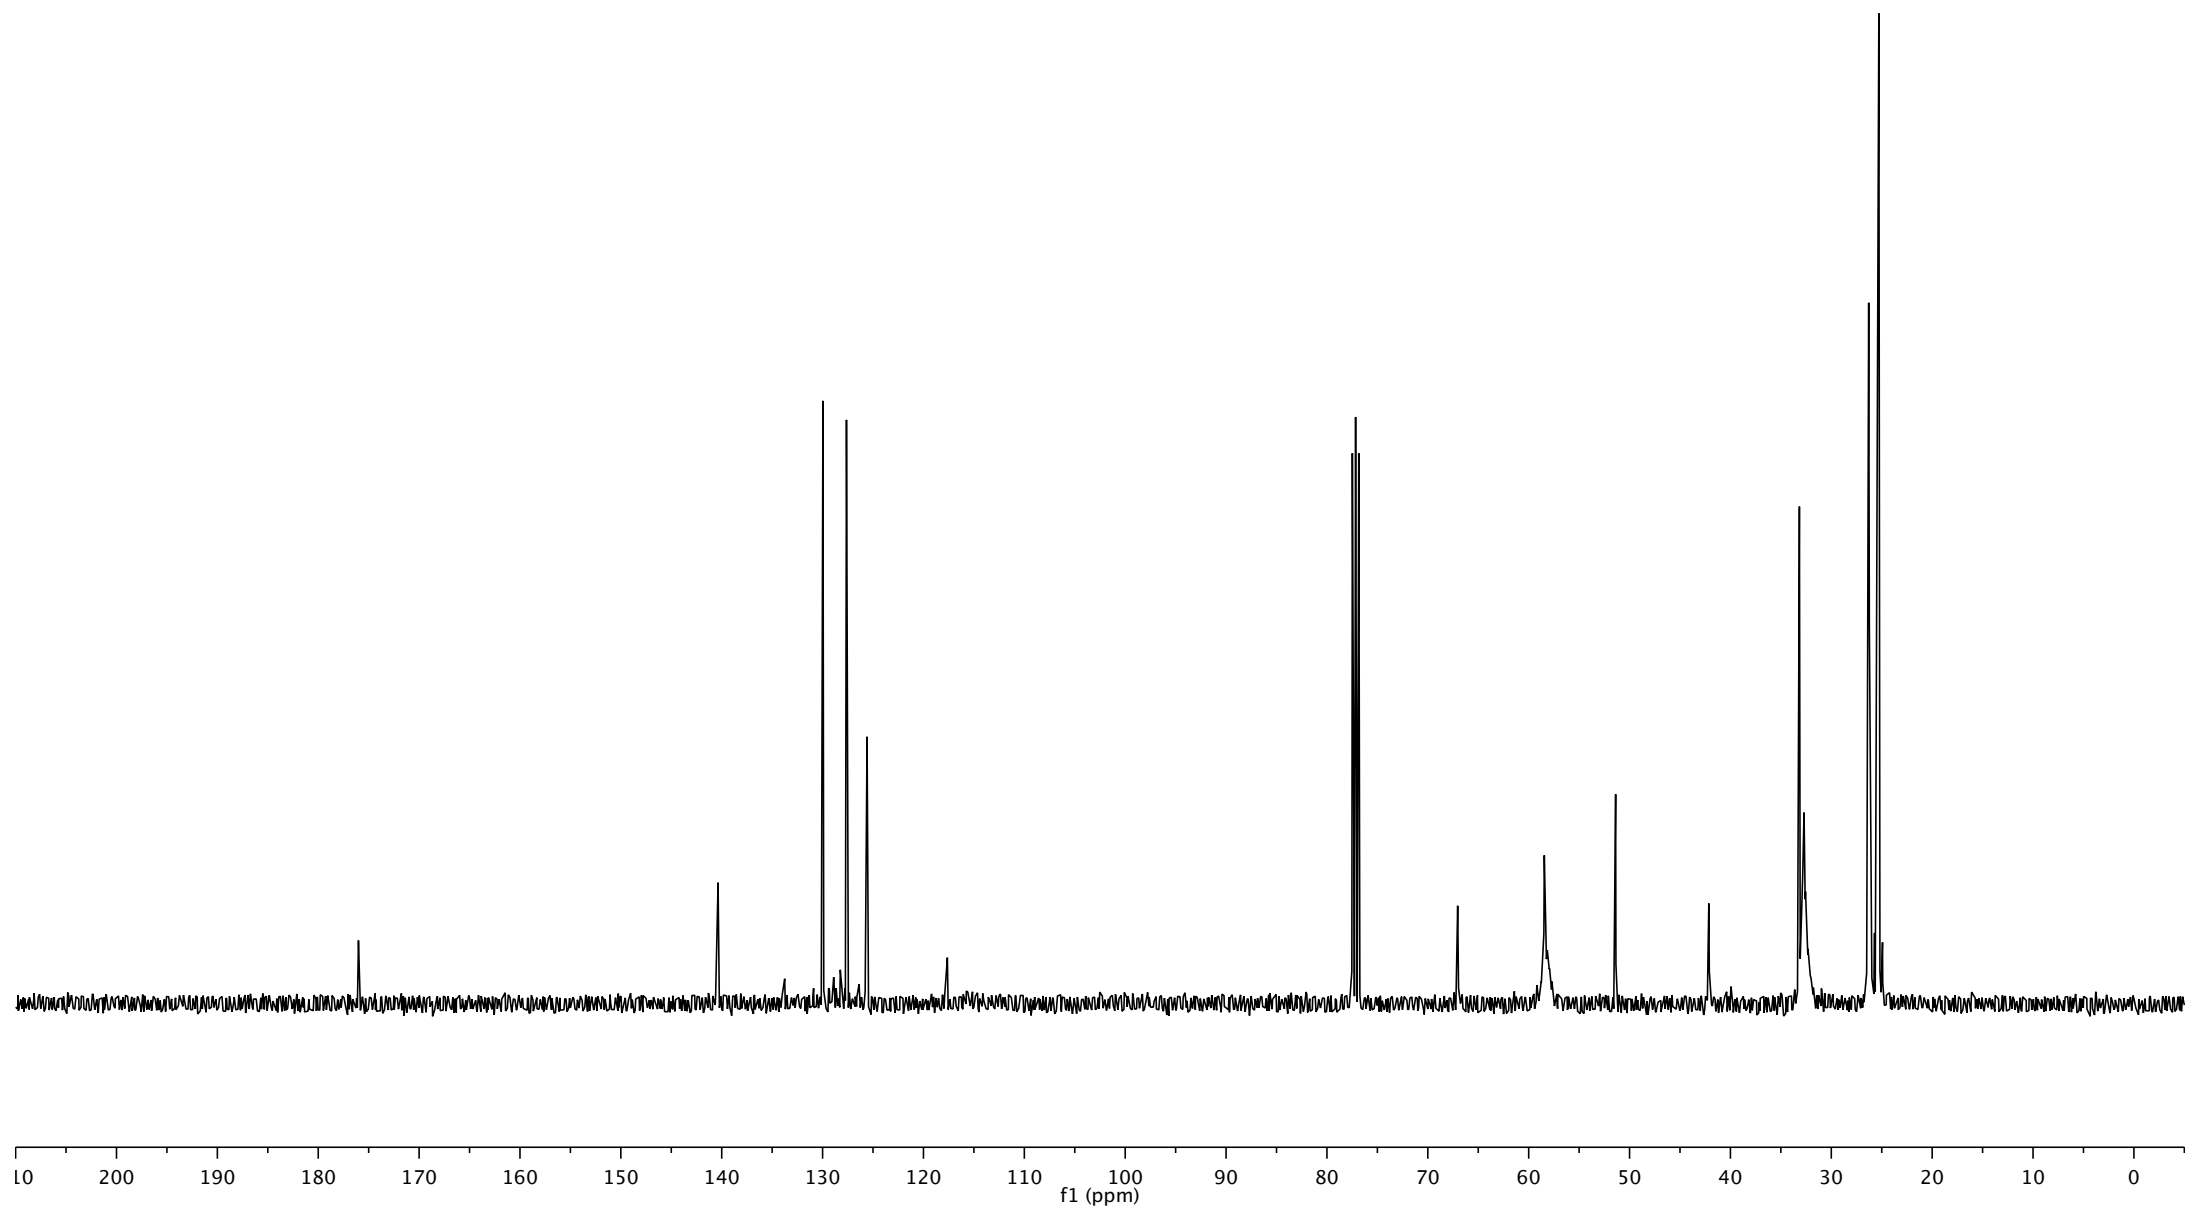



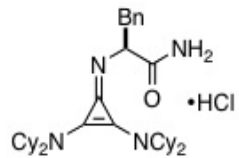

9.50

8.64  
8.61

7.42  
7.41  
7.30  
7.28  
7.26  
7.25  
7.21  
7.19

5.54

4.19  
4.17  
4.16  
4.15  
4.14  
3.83  
3.80  
3.77  
3.33  
3.32  
3.31  
3.30  
3.29  
3.28  
3.27

1.91  
1.88  
1.88  
1.86  
1.86  
1.72  
1.70  
1.68  
1.64  
1.62  
1.61  
1.43  
1.42  
1.40  
1.39  
1.36

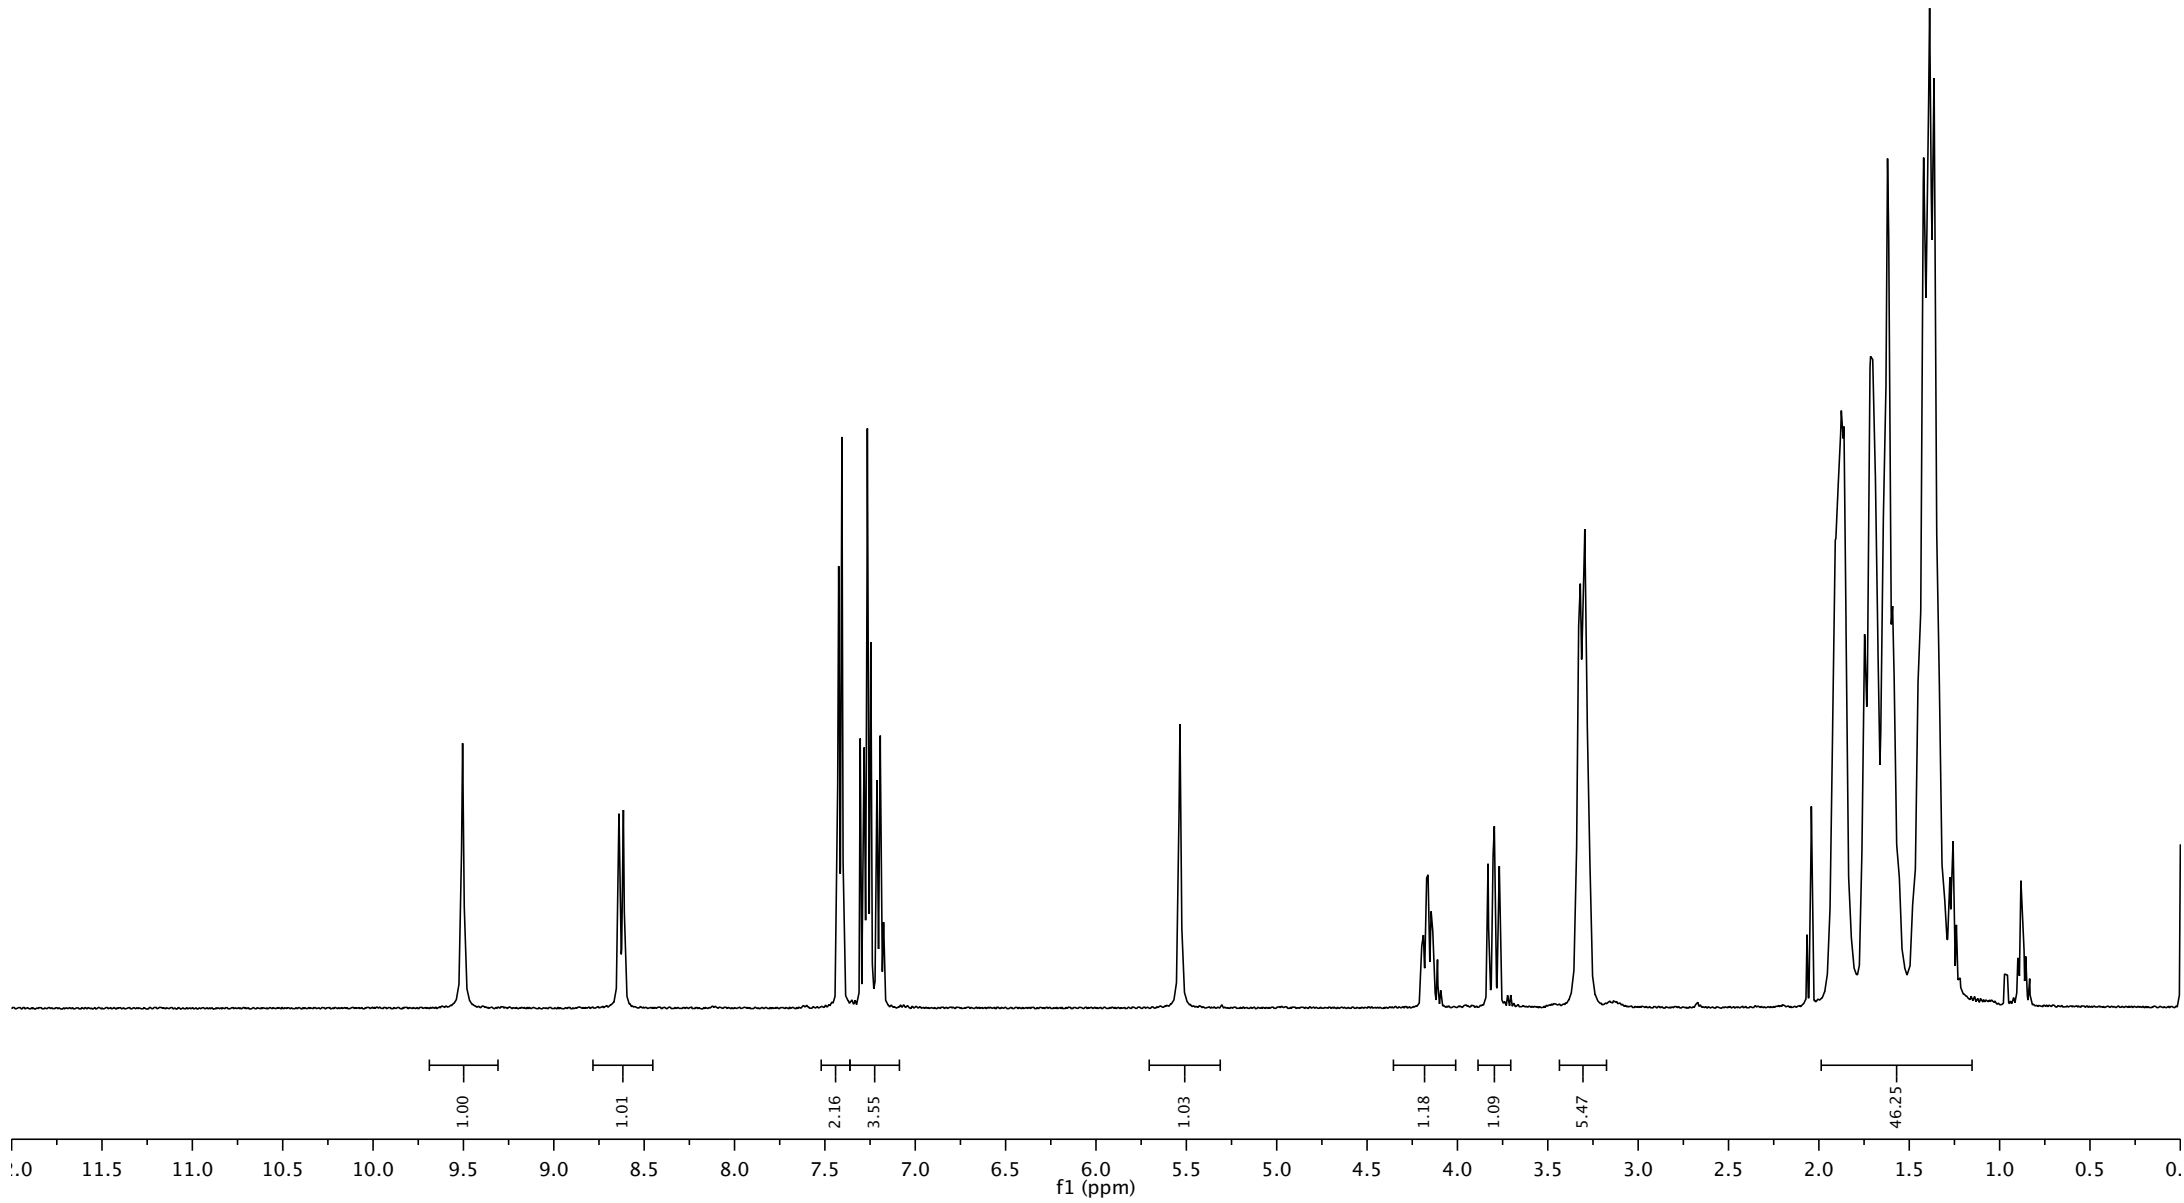

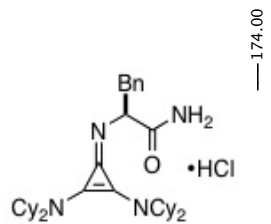

—174.00

—137.30

—129.30

—128.04

—126.43

—115.04

—114.58

77.48 CDCl<sub>3</sub>

77.16 CDCl<sub>3</sub>

76.84 CDCl<sub>3</sub>

—64.81

—59.17

—38.38

—31.94

—31.84

—25.29

—25.27

—24.27

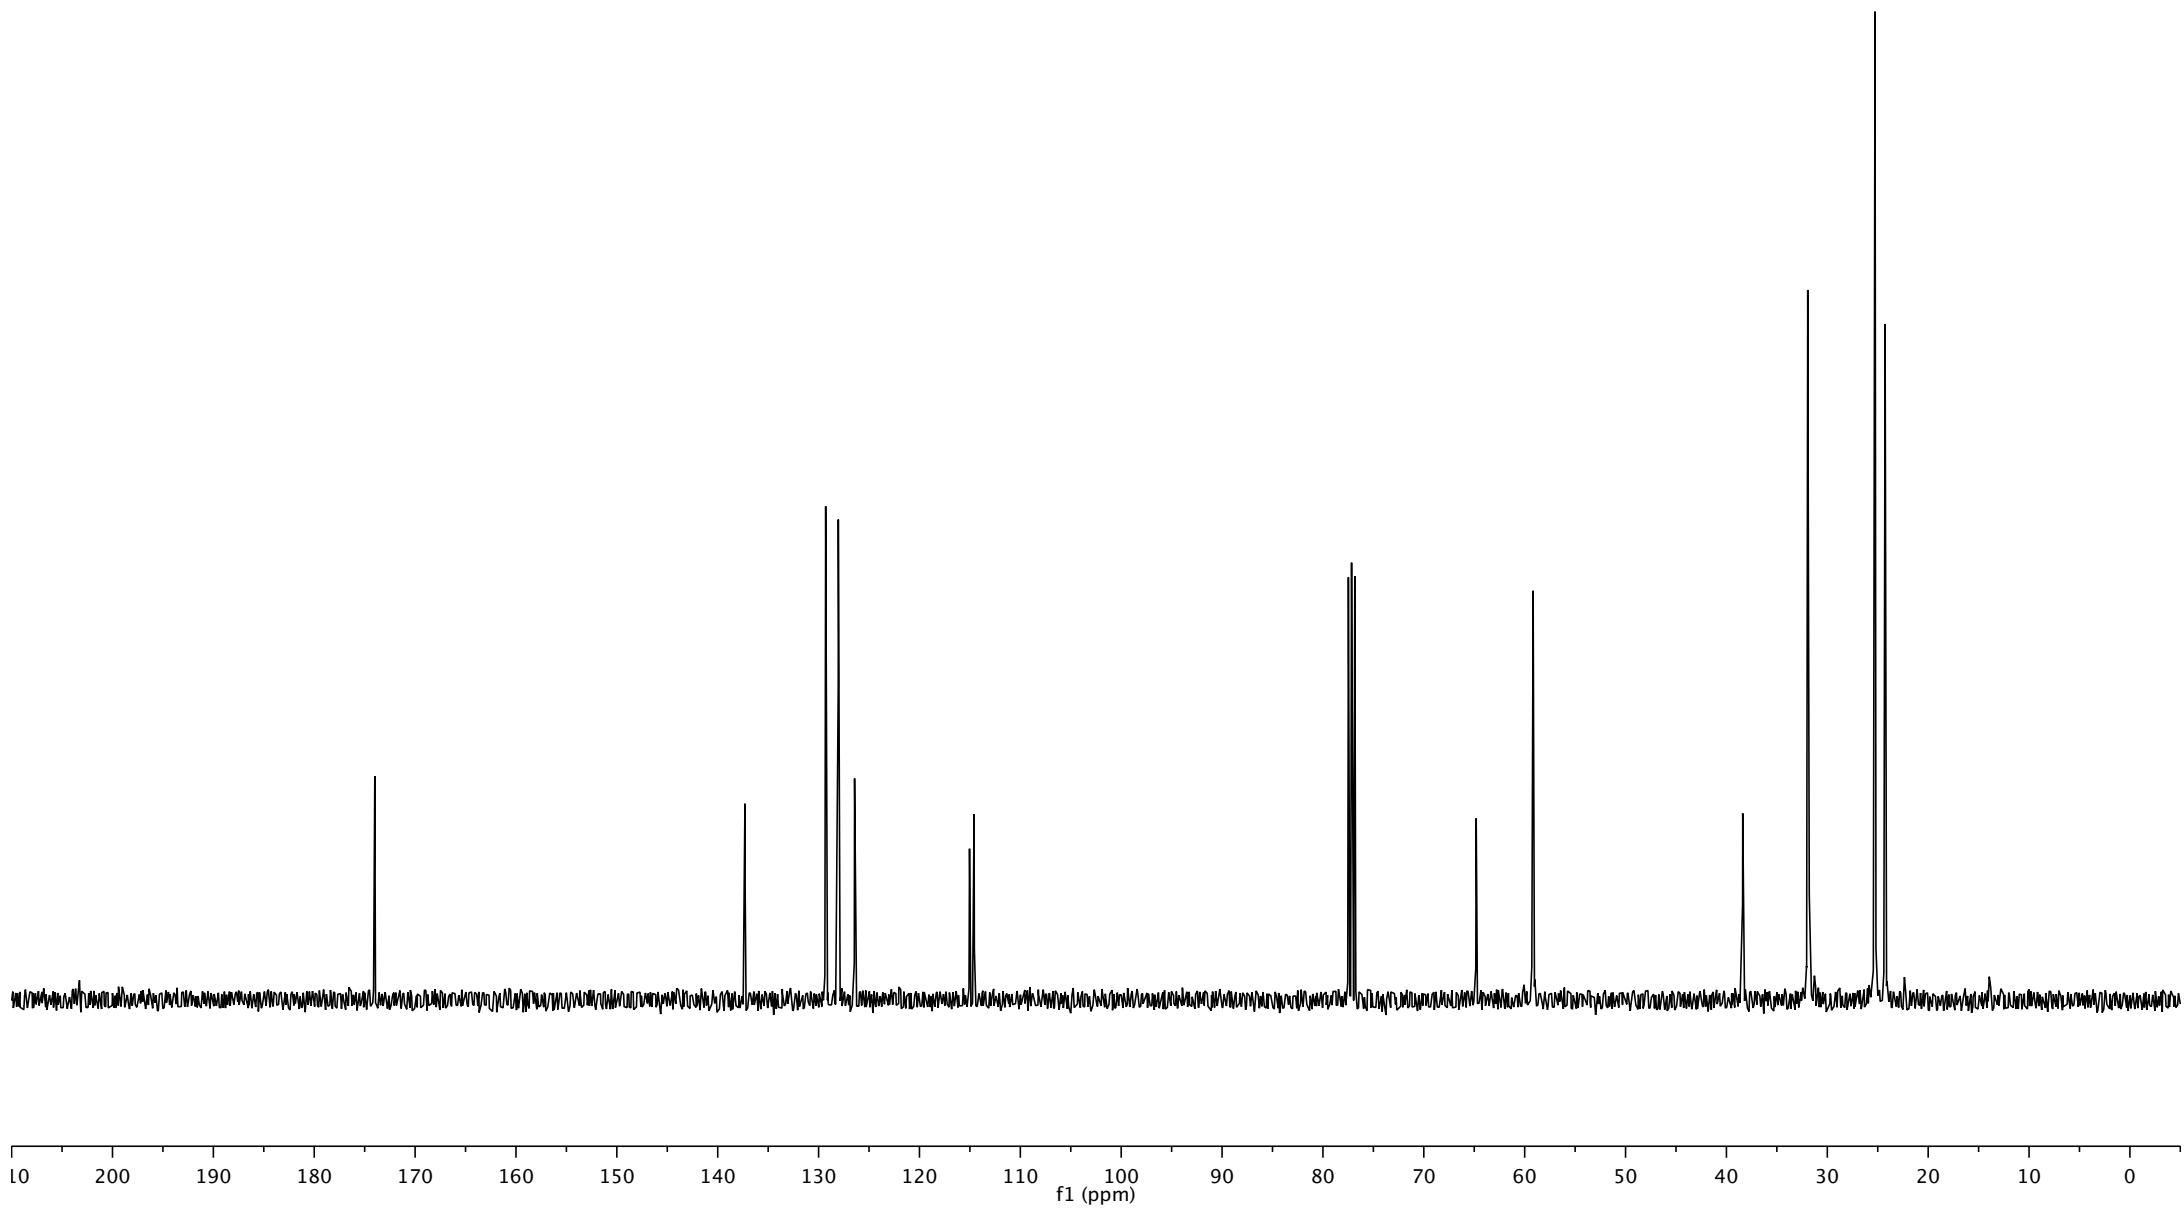

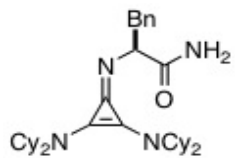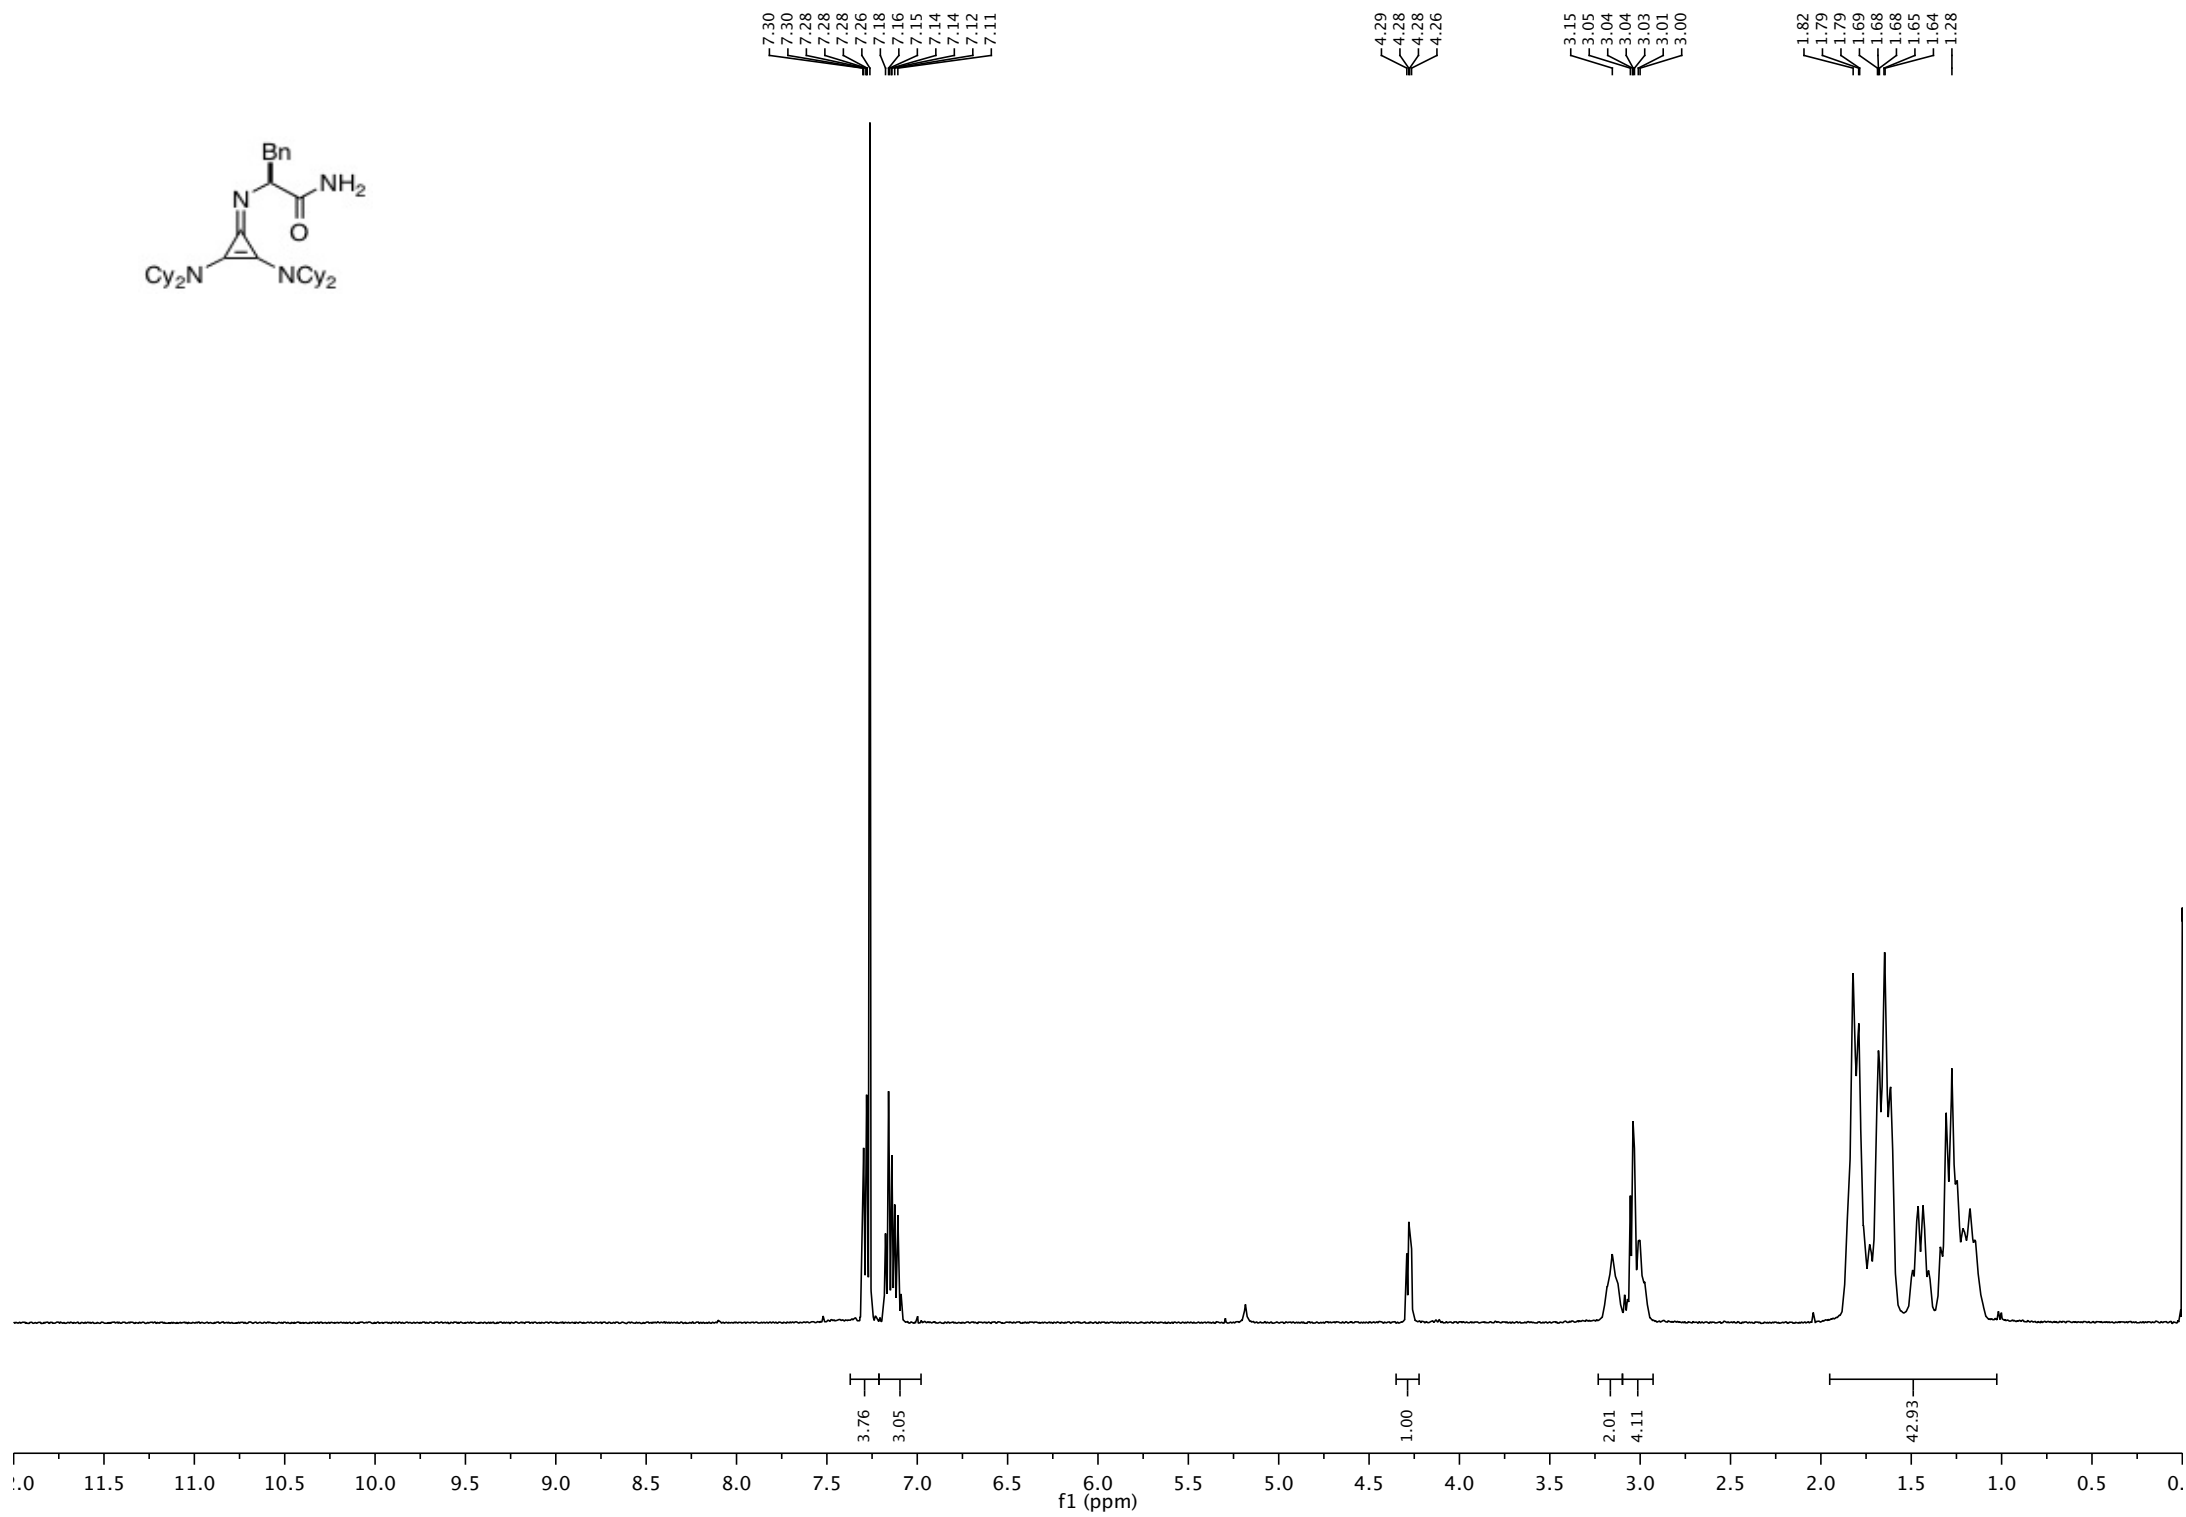

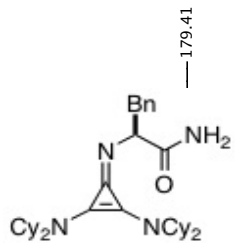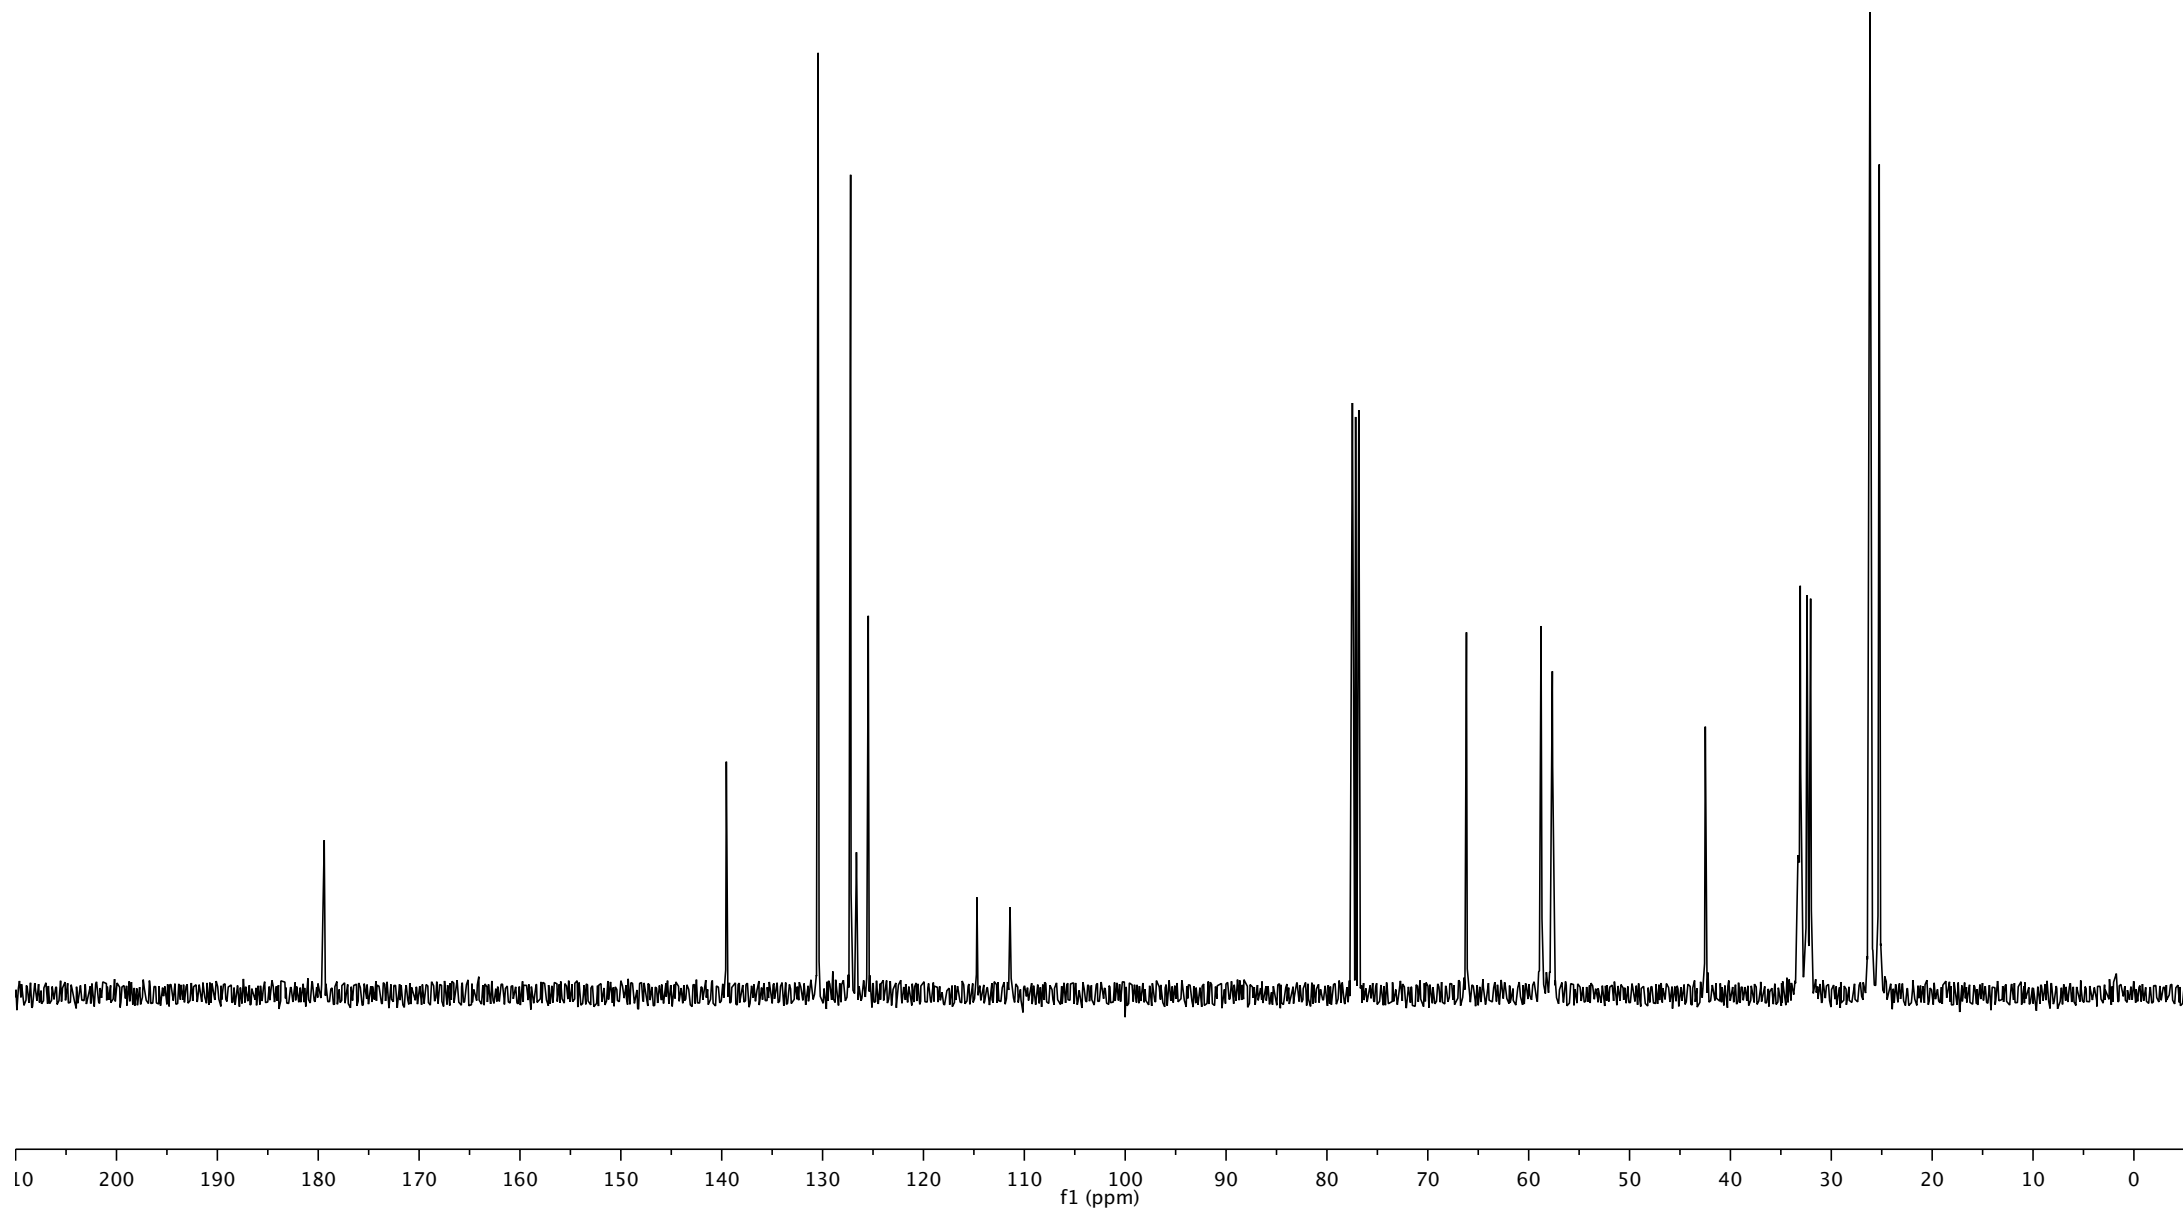

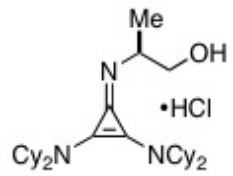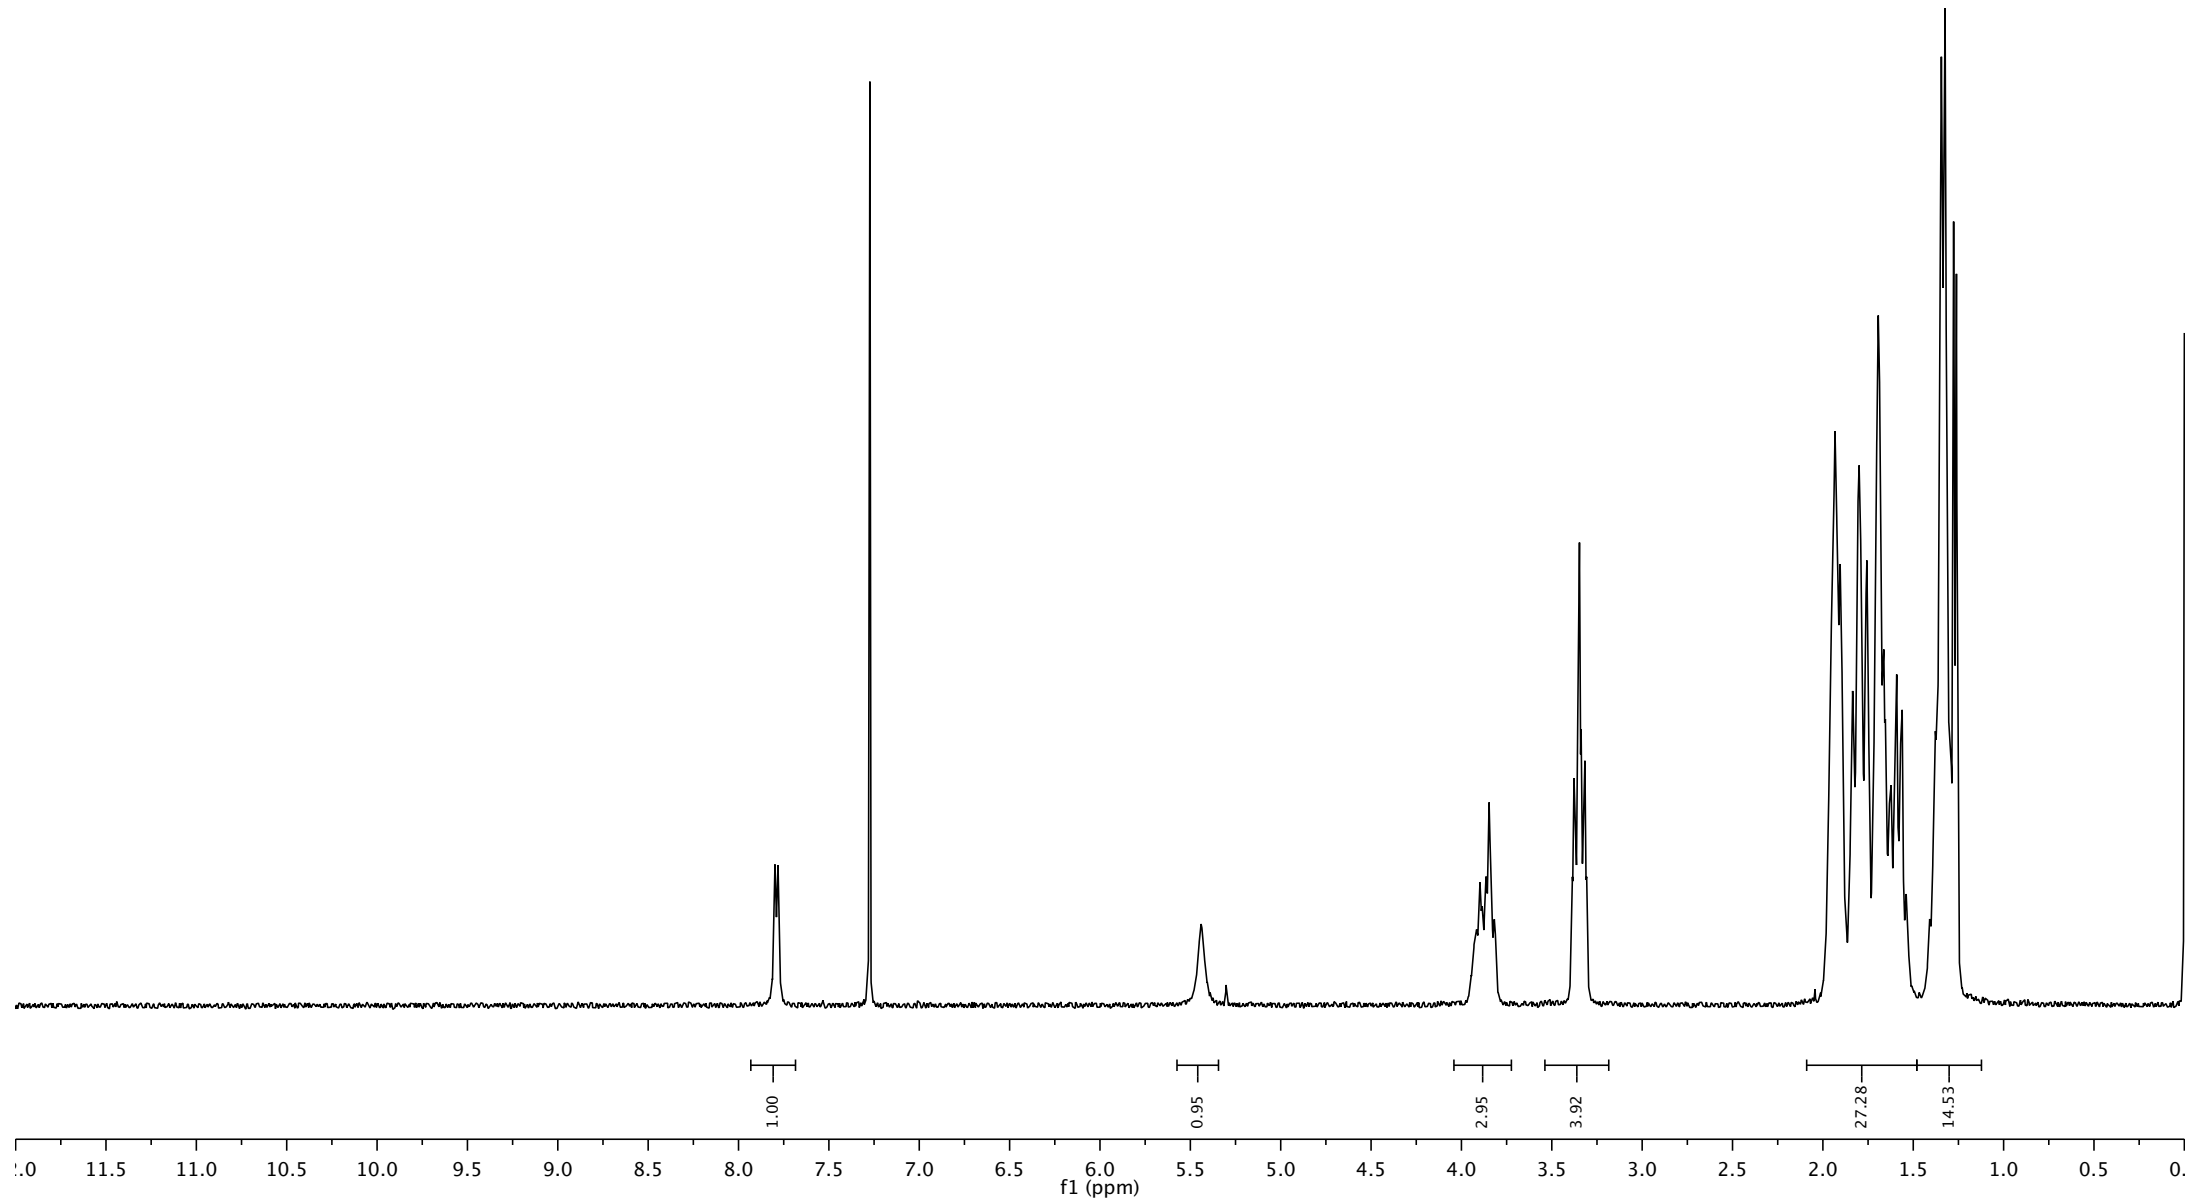

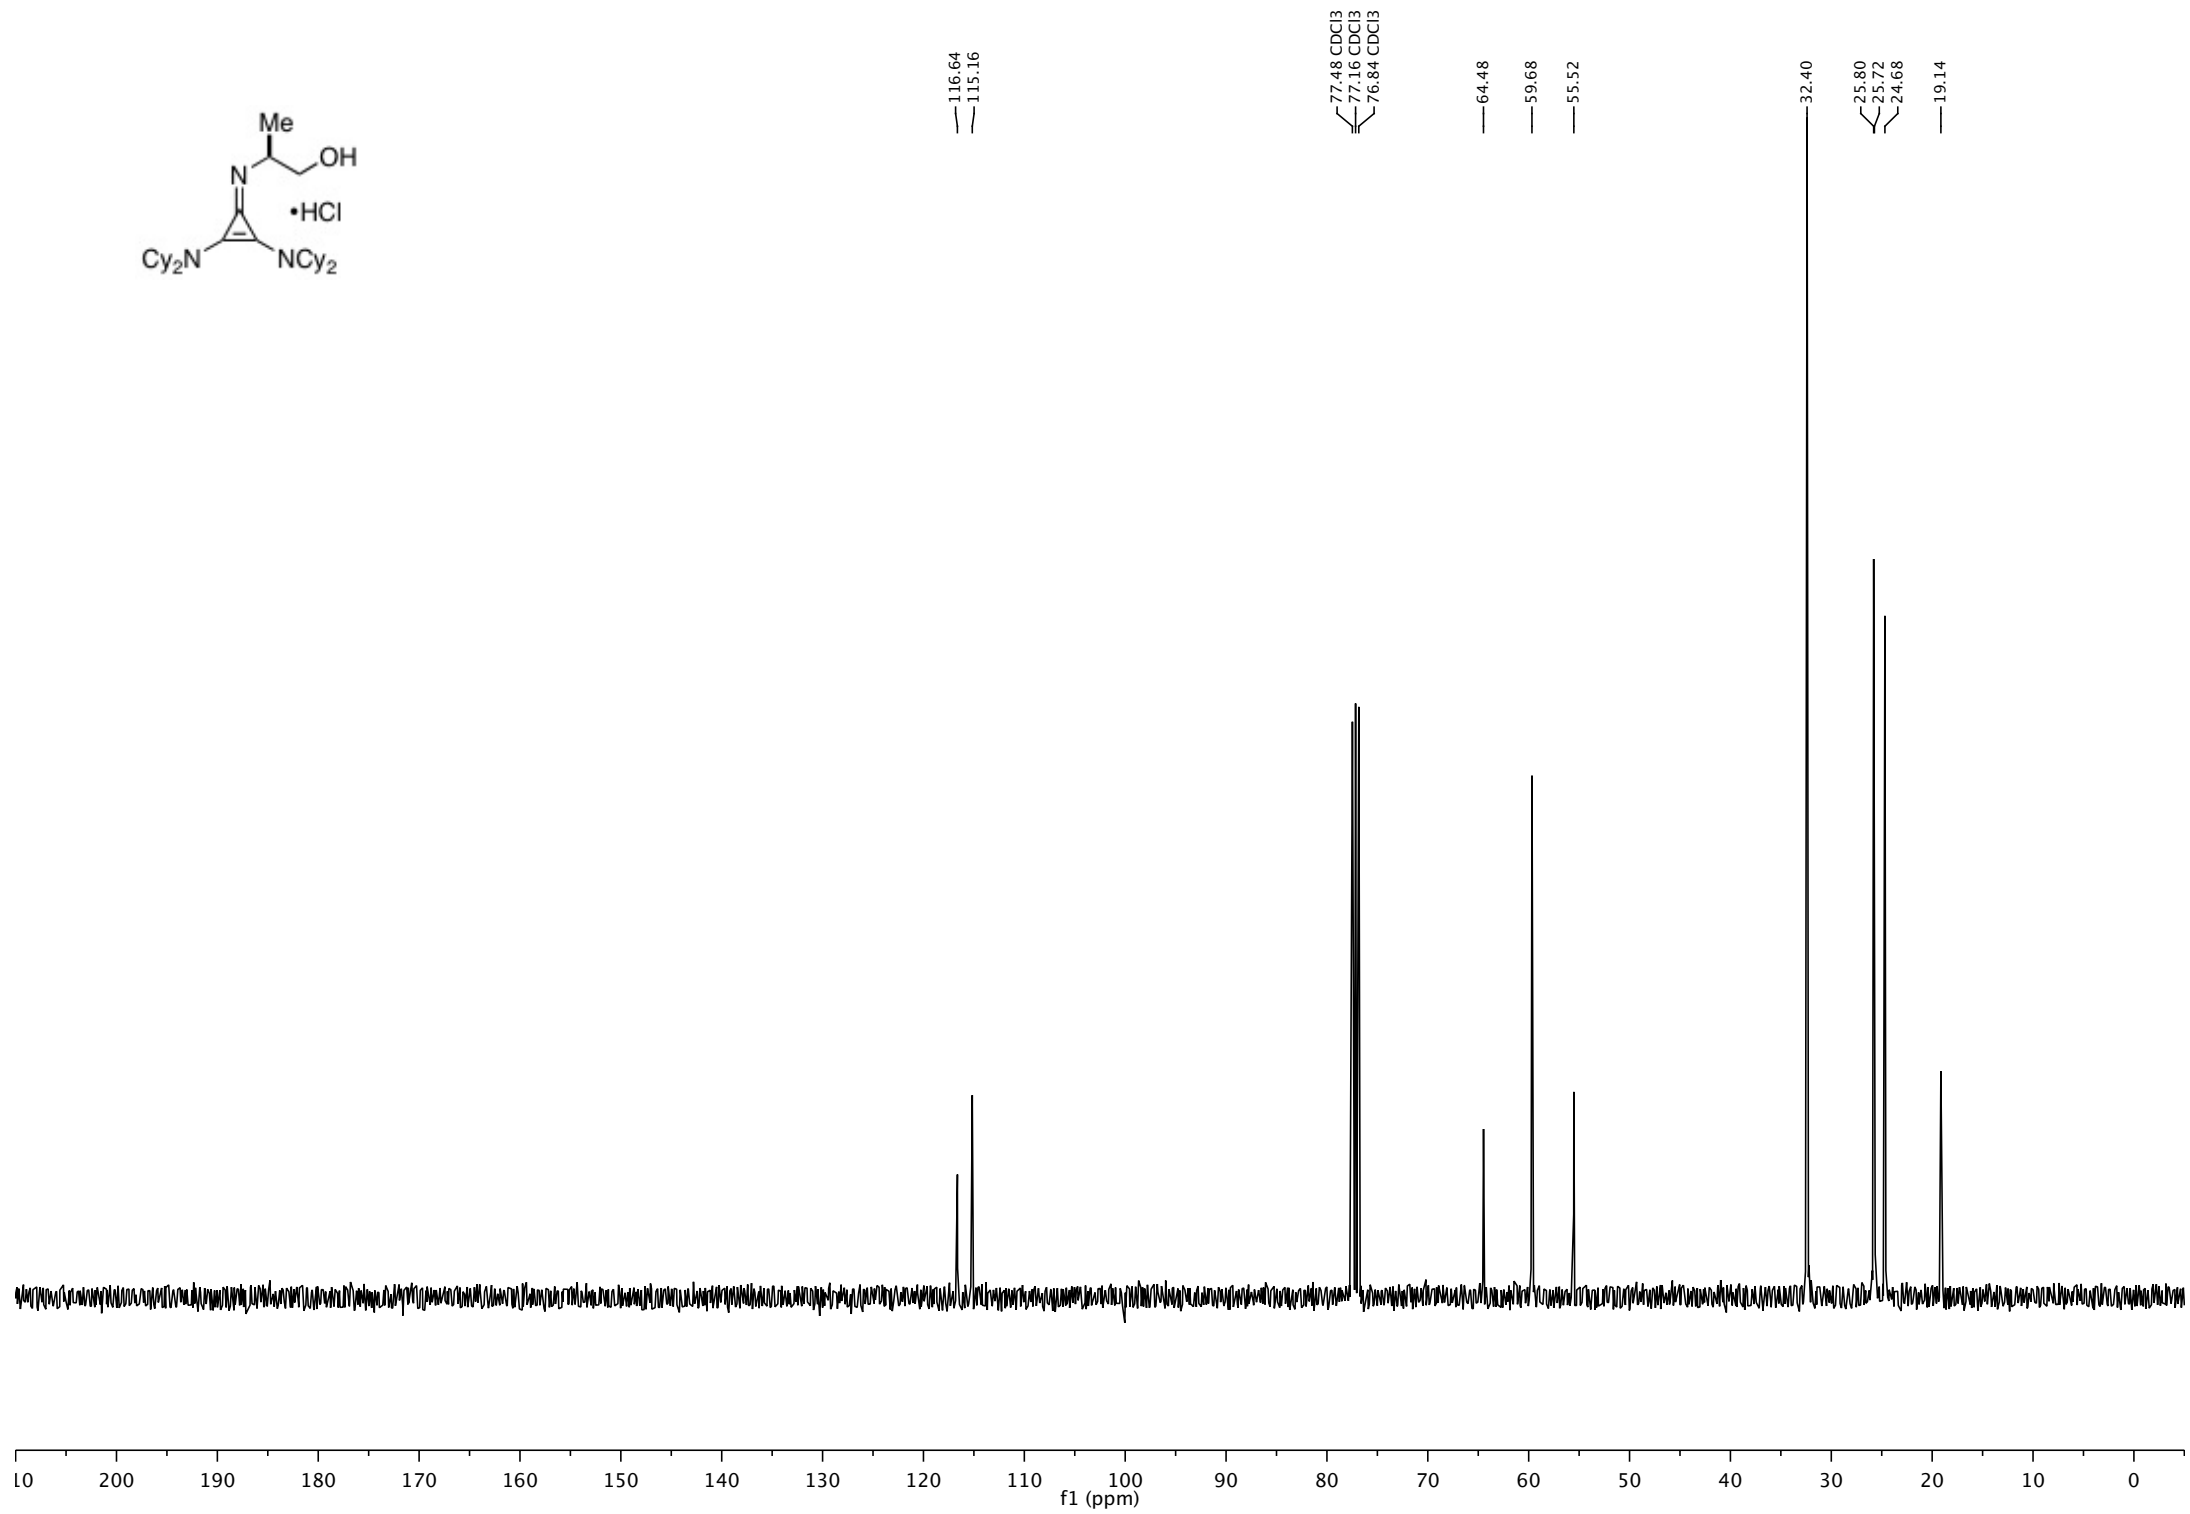

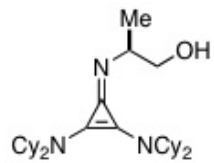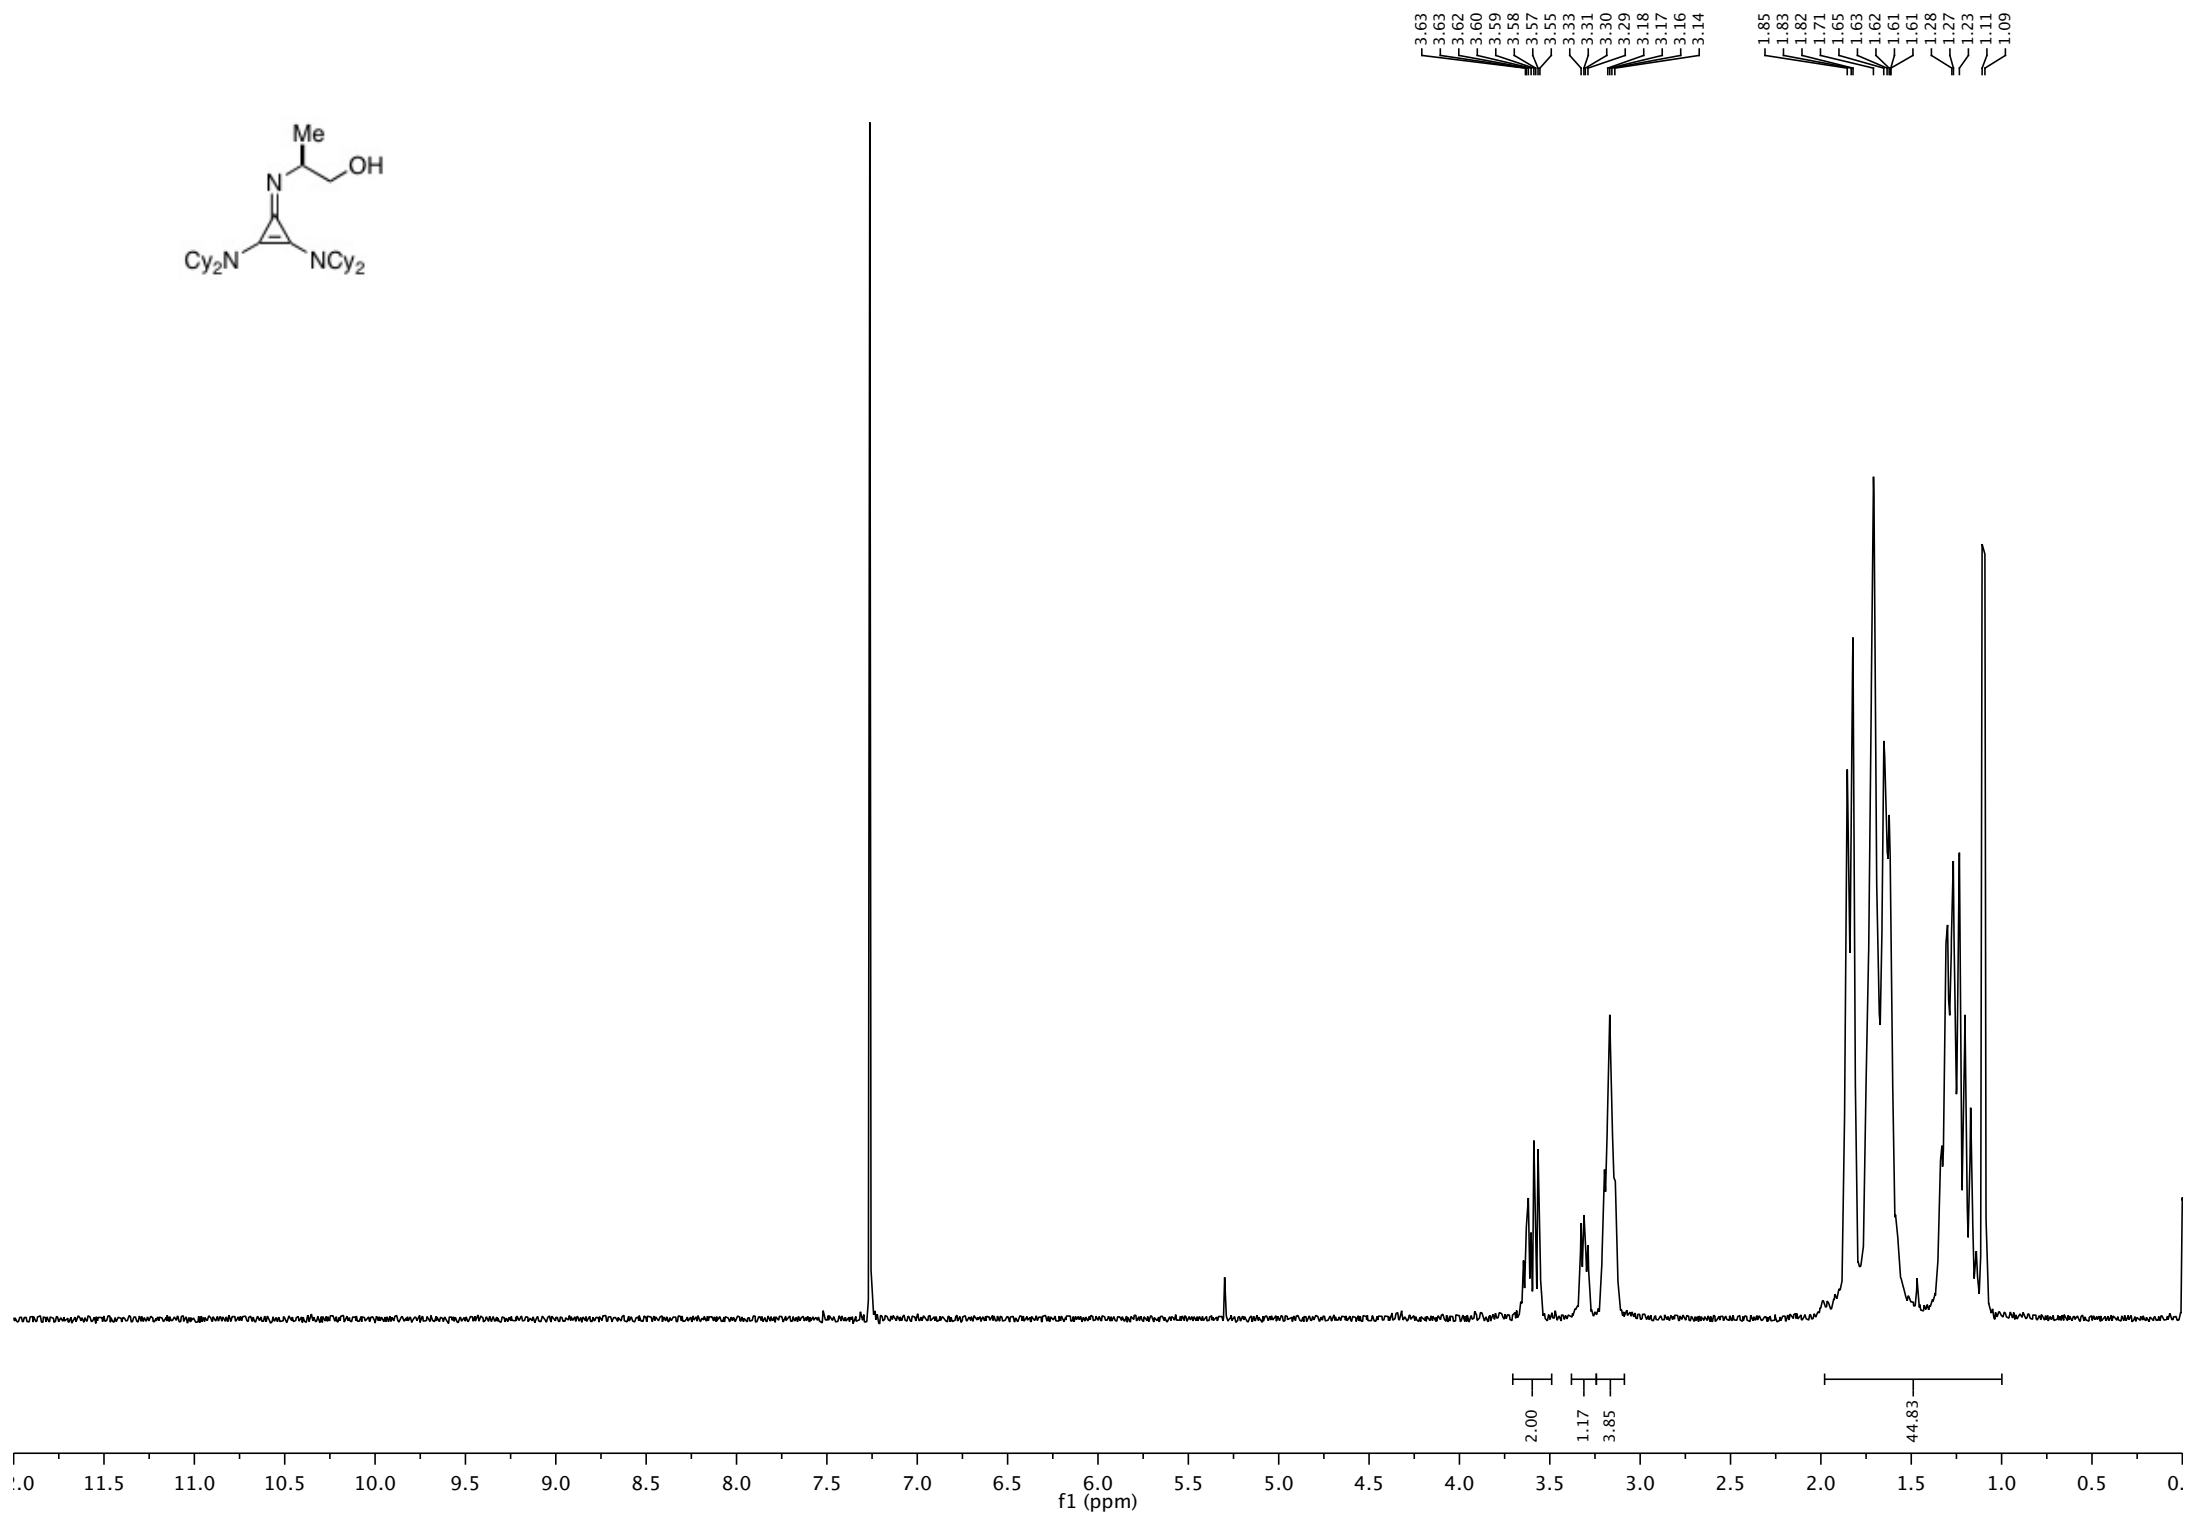

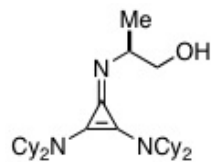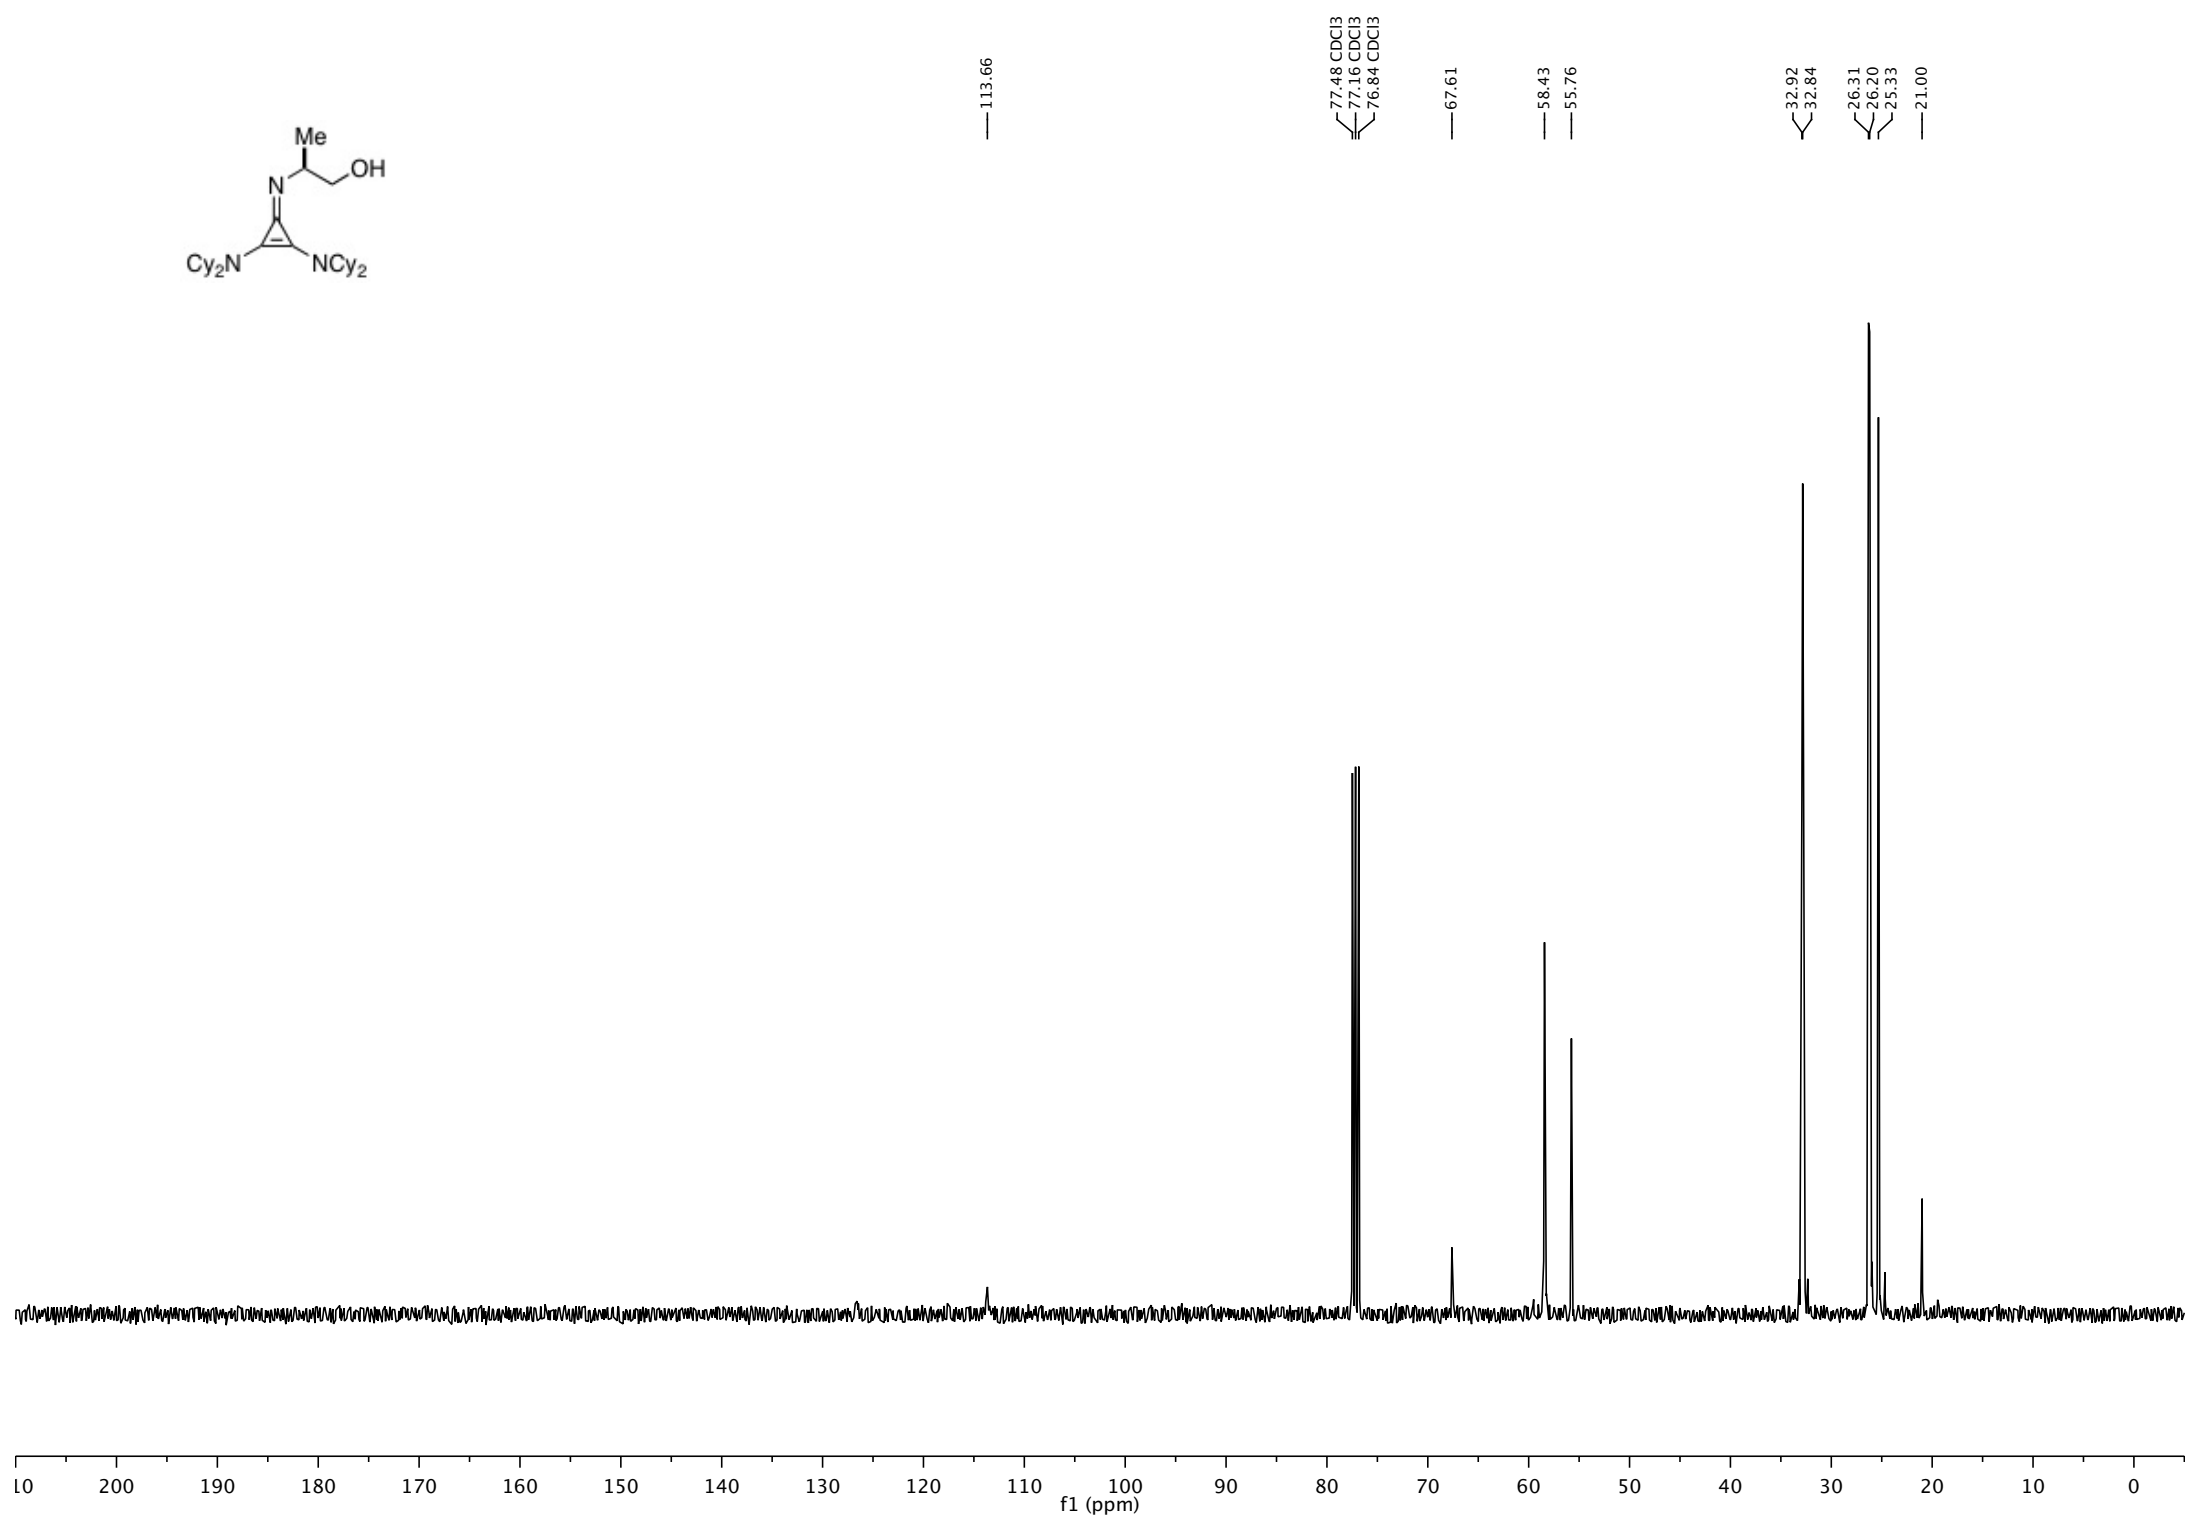



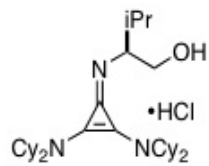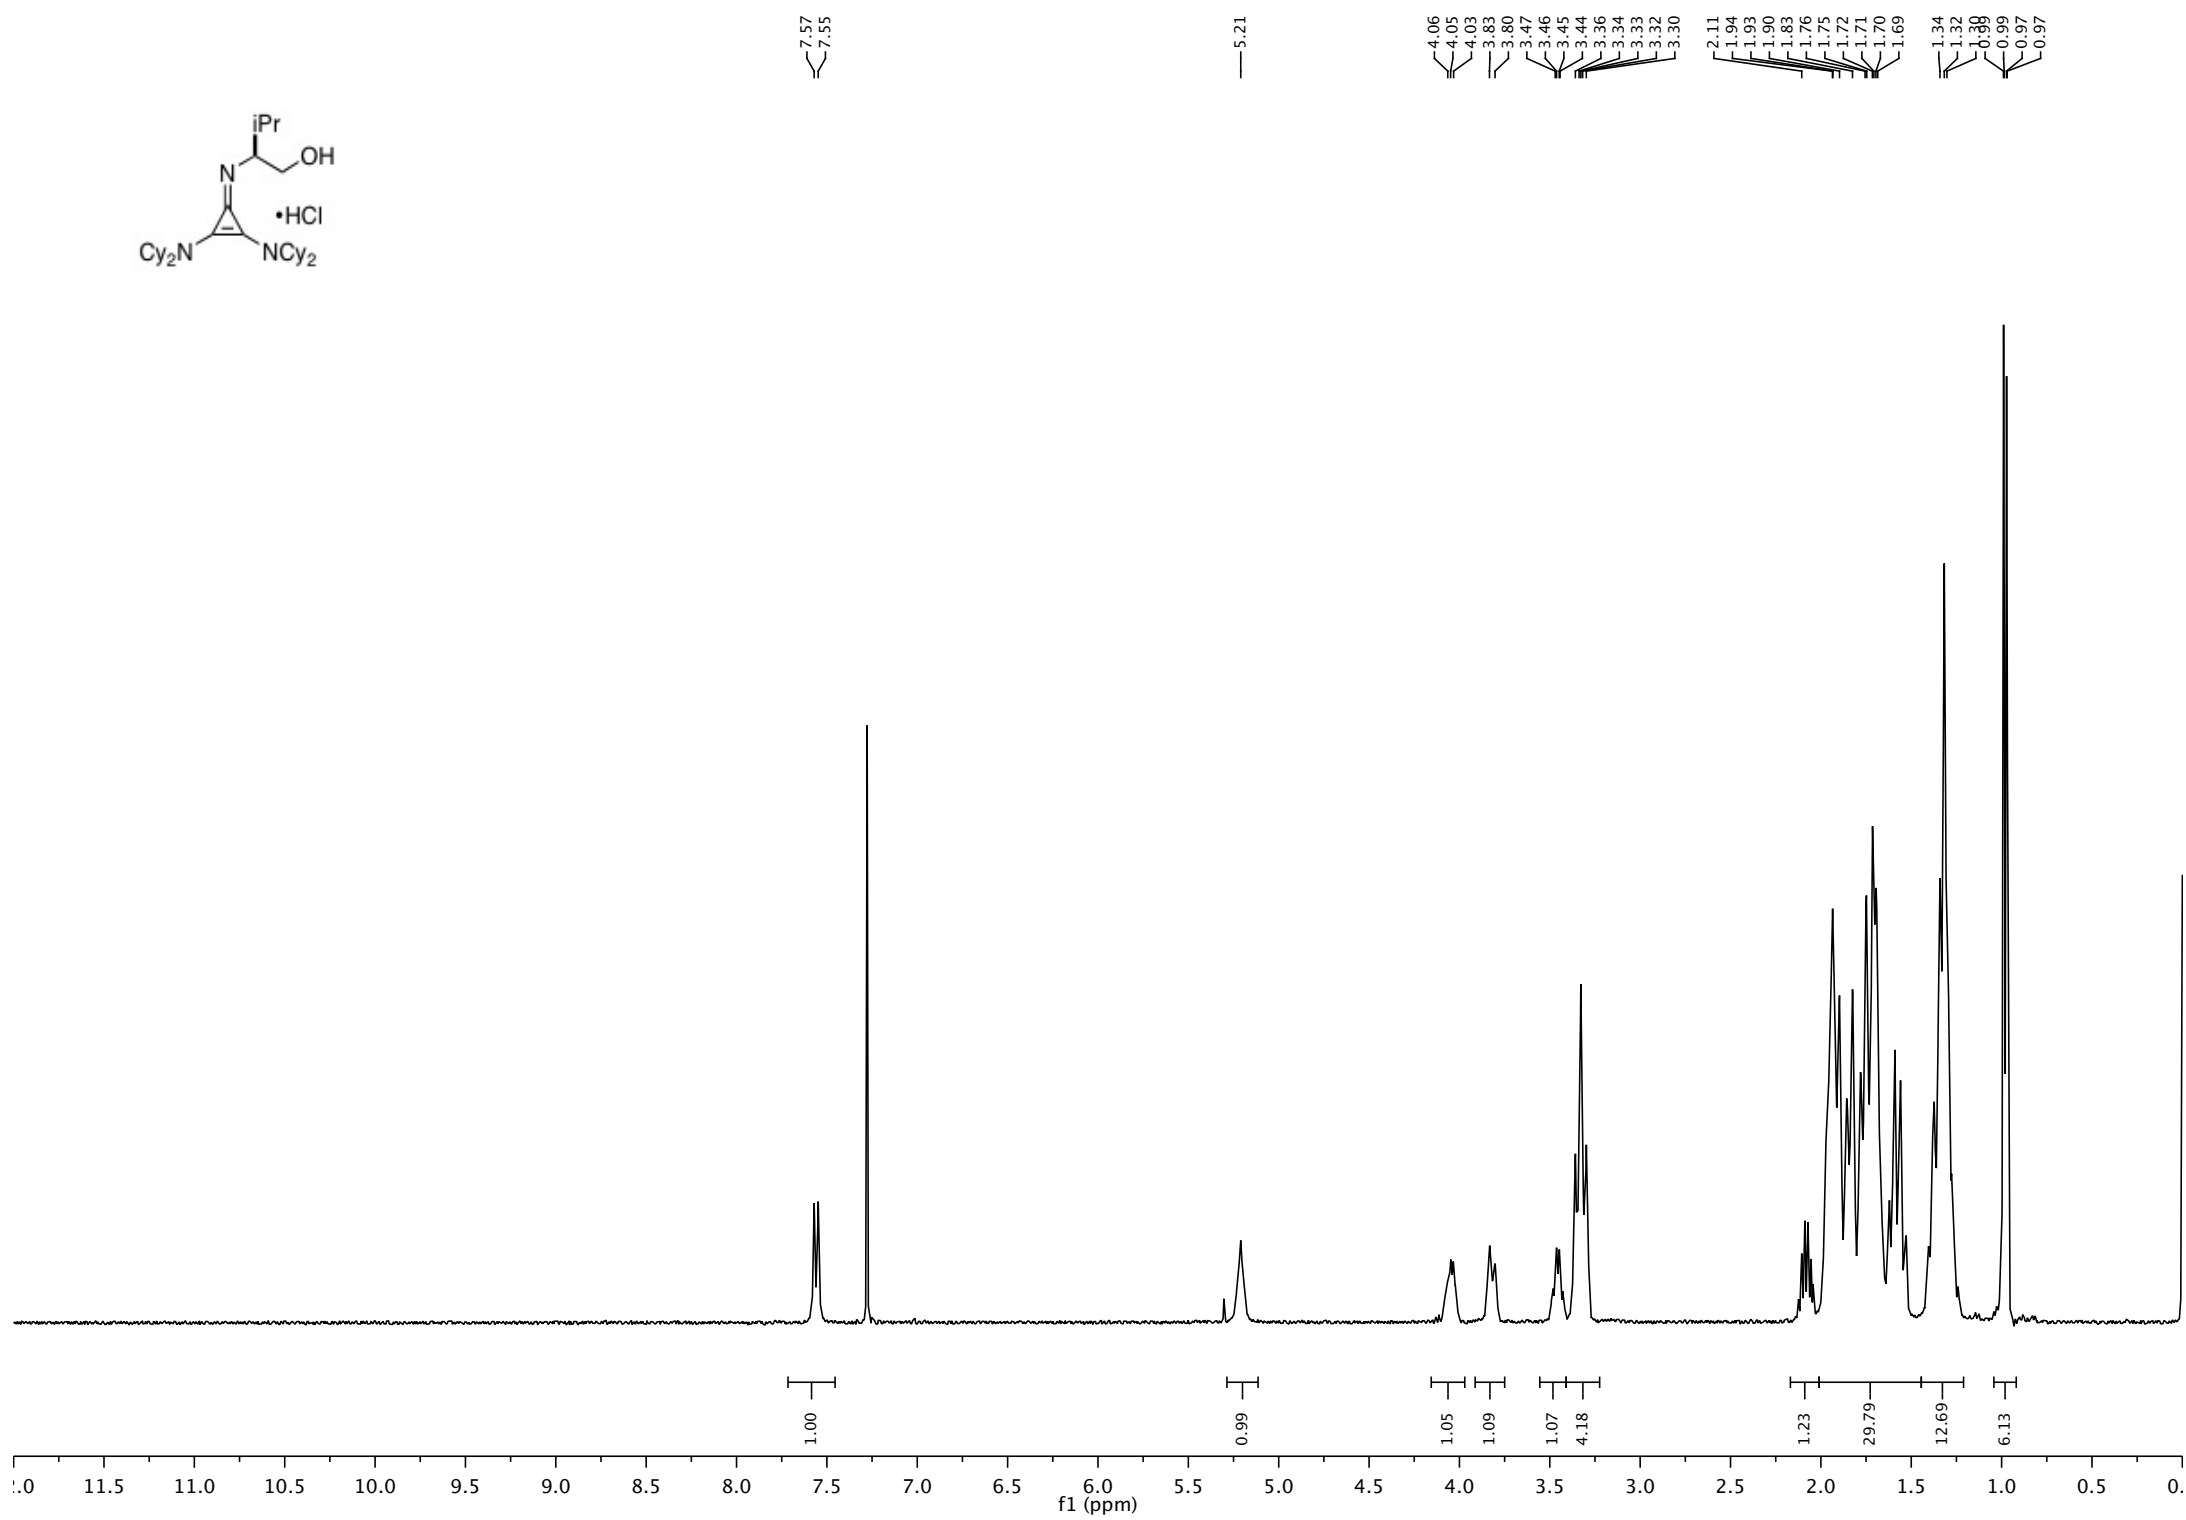

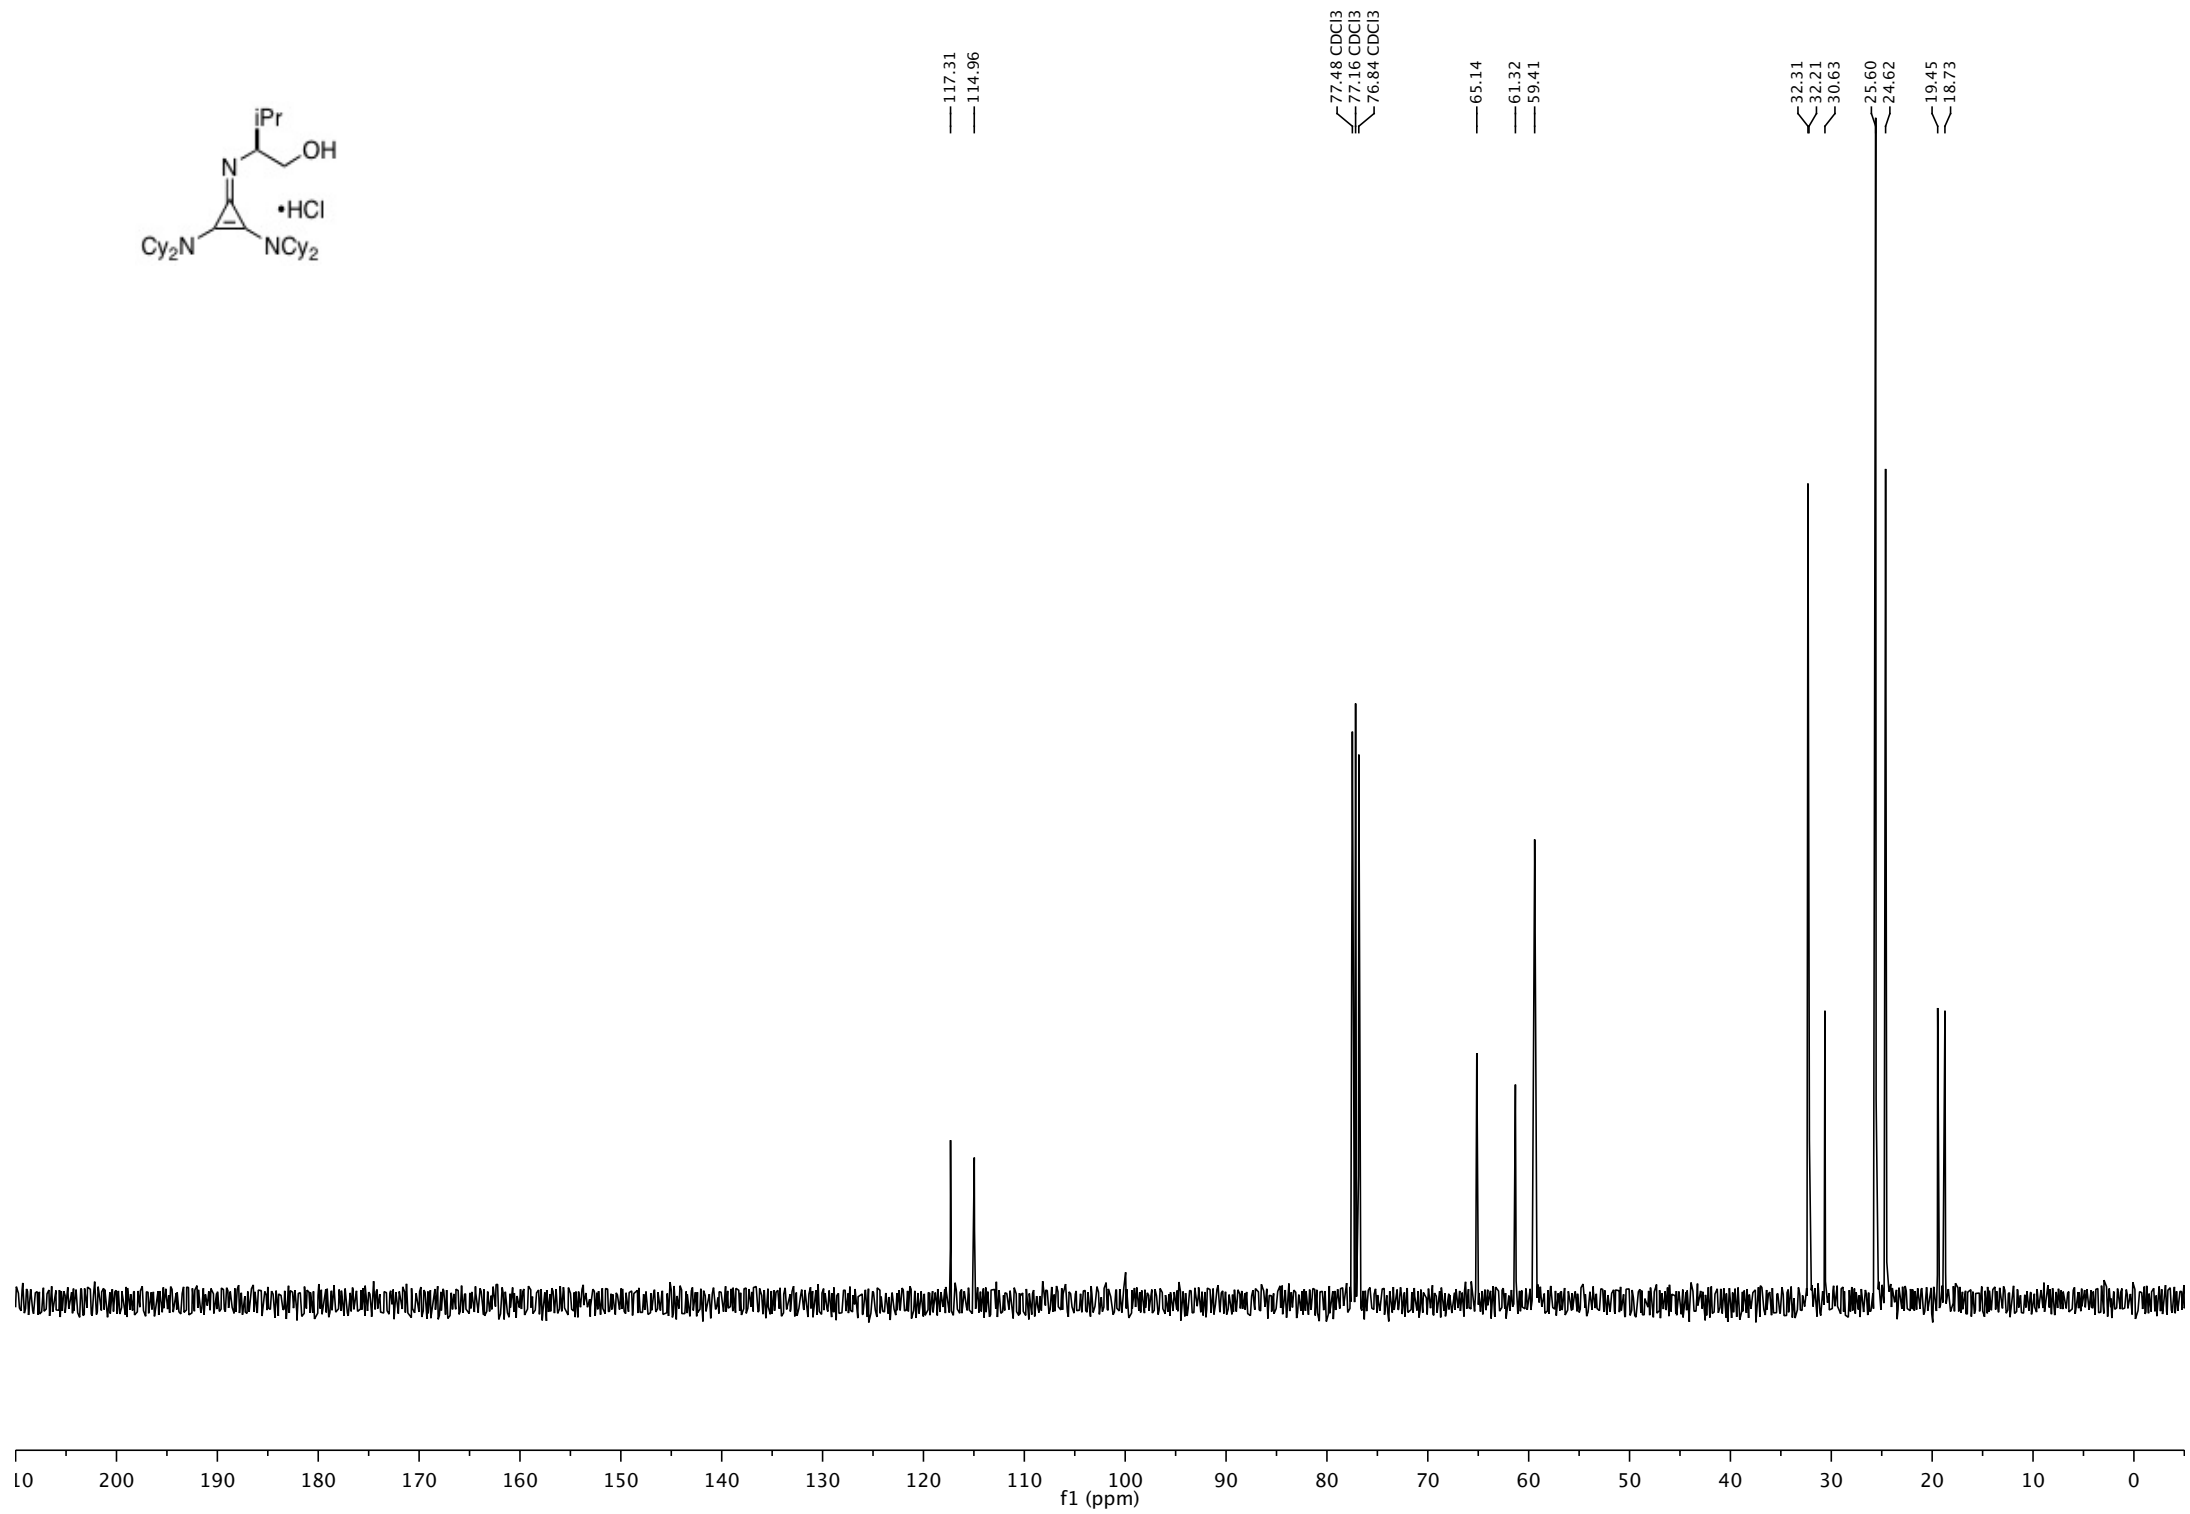

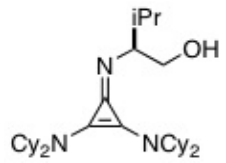

3.55  
3.54  
3.53  
3.51  
3.32  
3.30  
3.18  
3.16  
3.14  
3.12  
3.10  
1.85  
1.84  
1.83  
1.82  
1.75  
1.72  
1.70  
1.69  
1.65  
1.62  
1.27  
1.26  
0.93  
0.92  
0.90

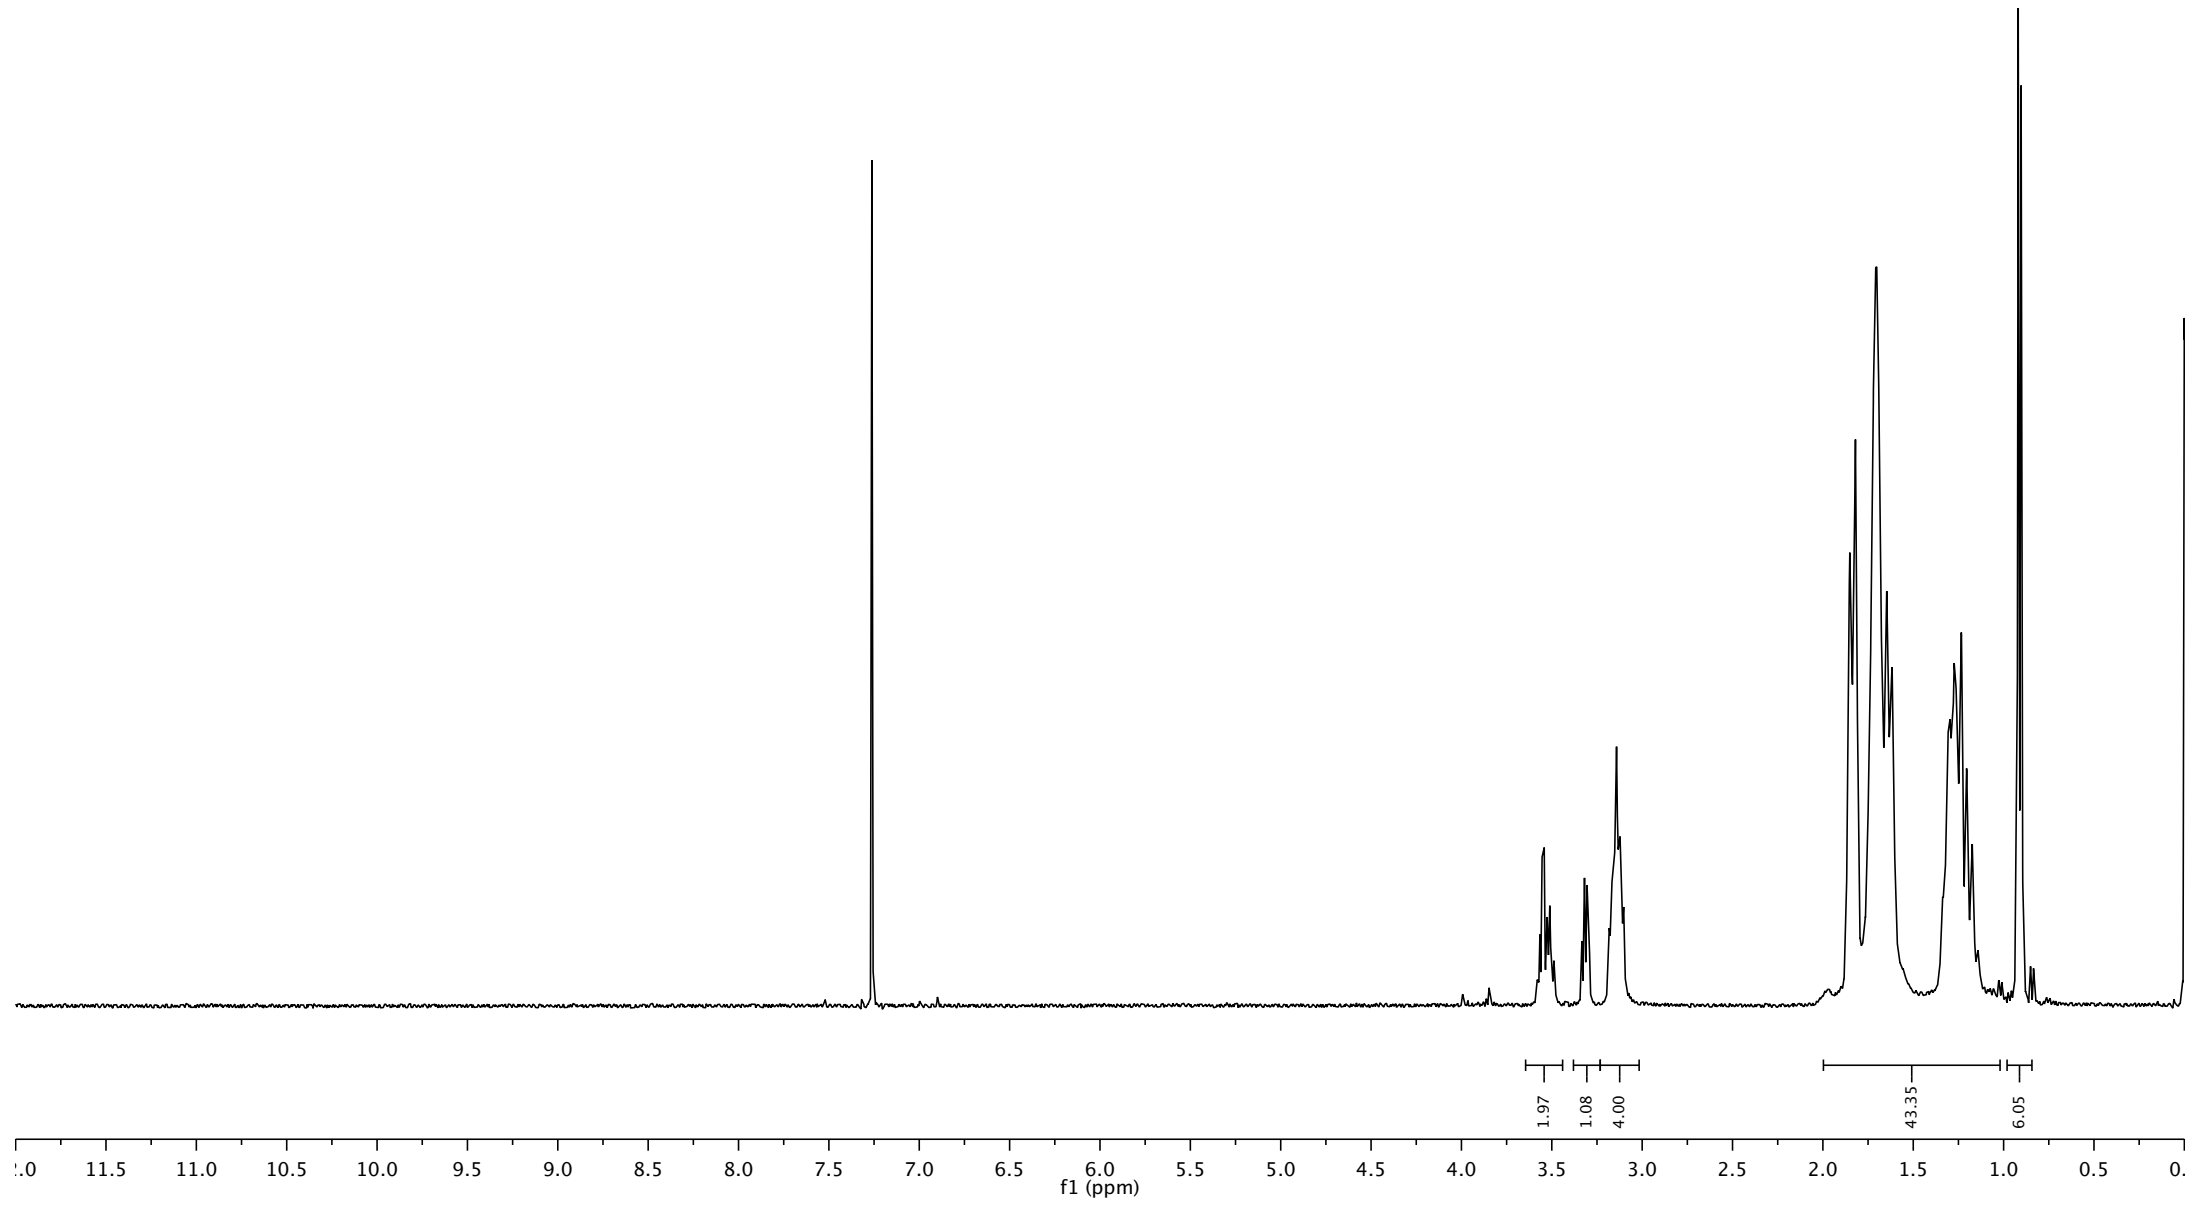

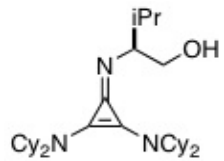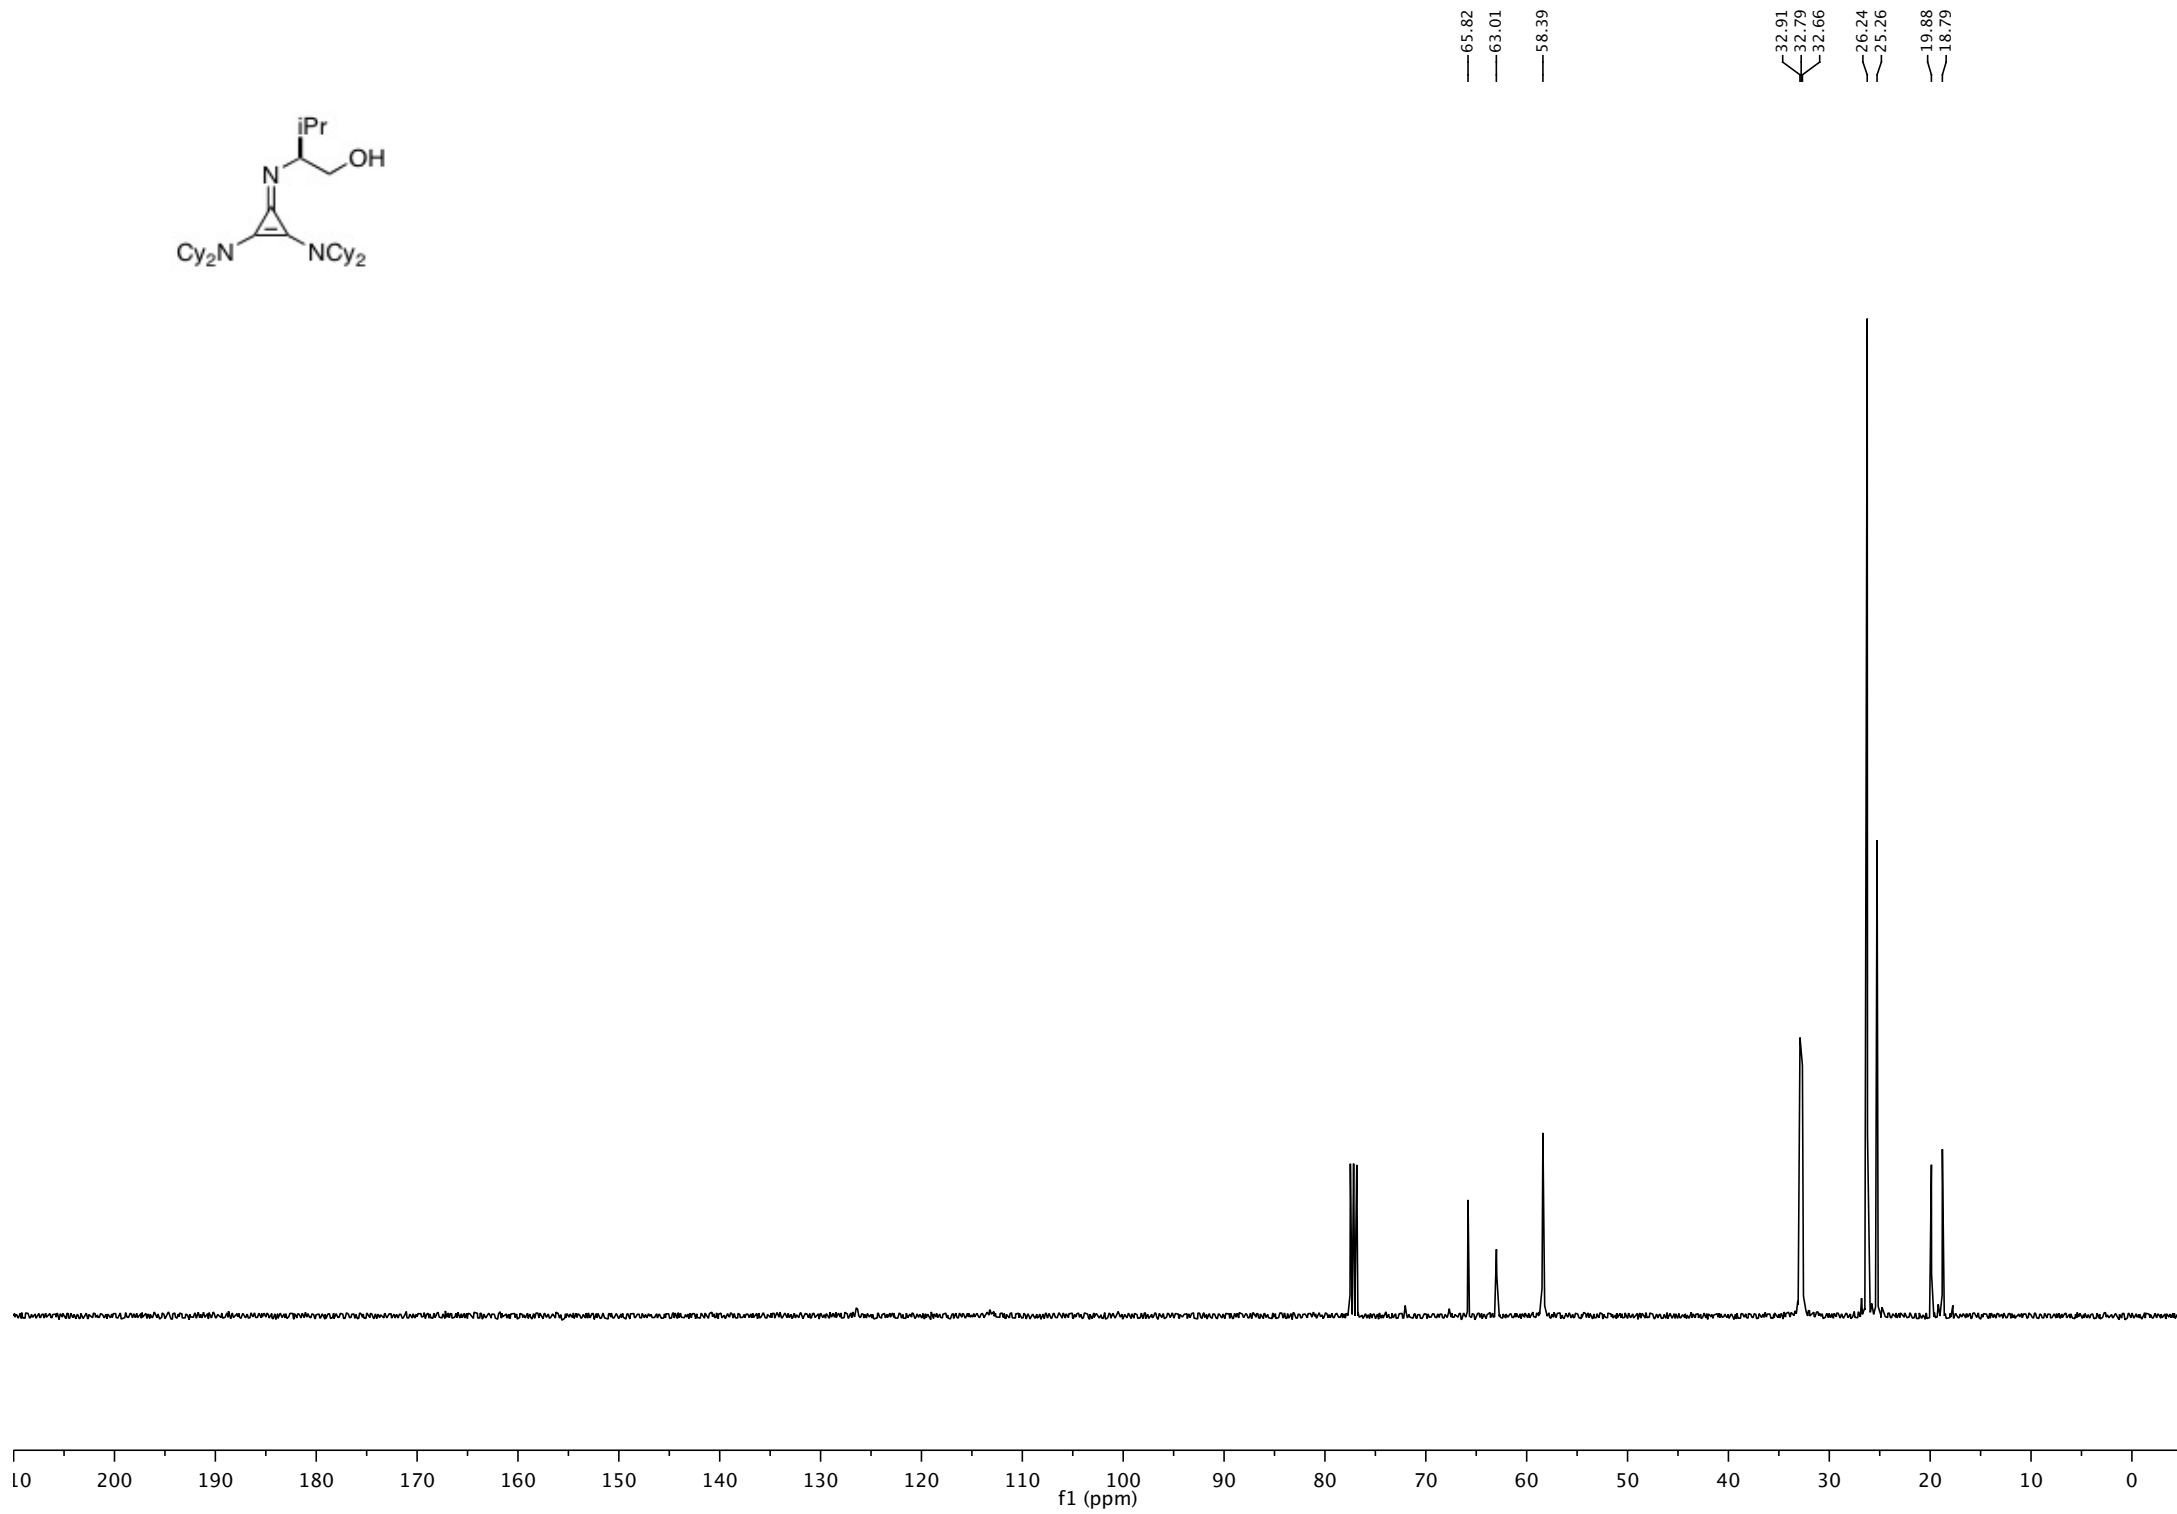

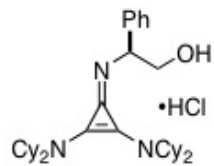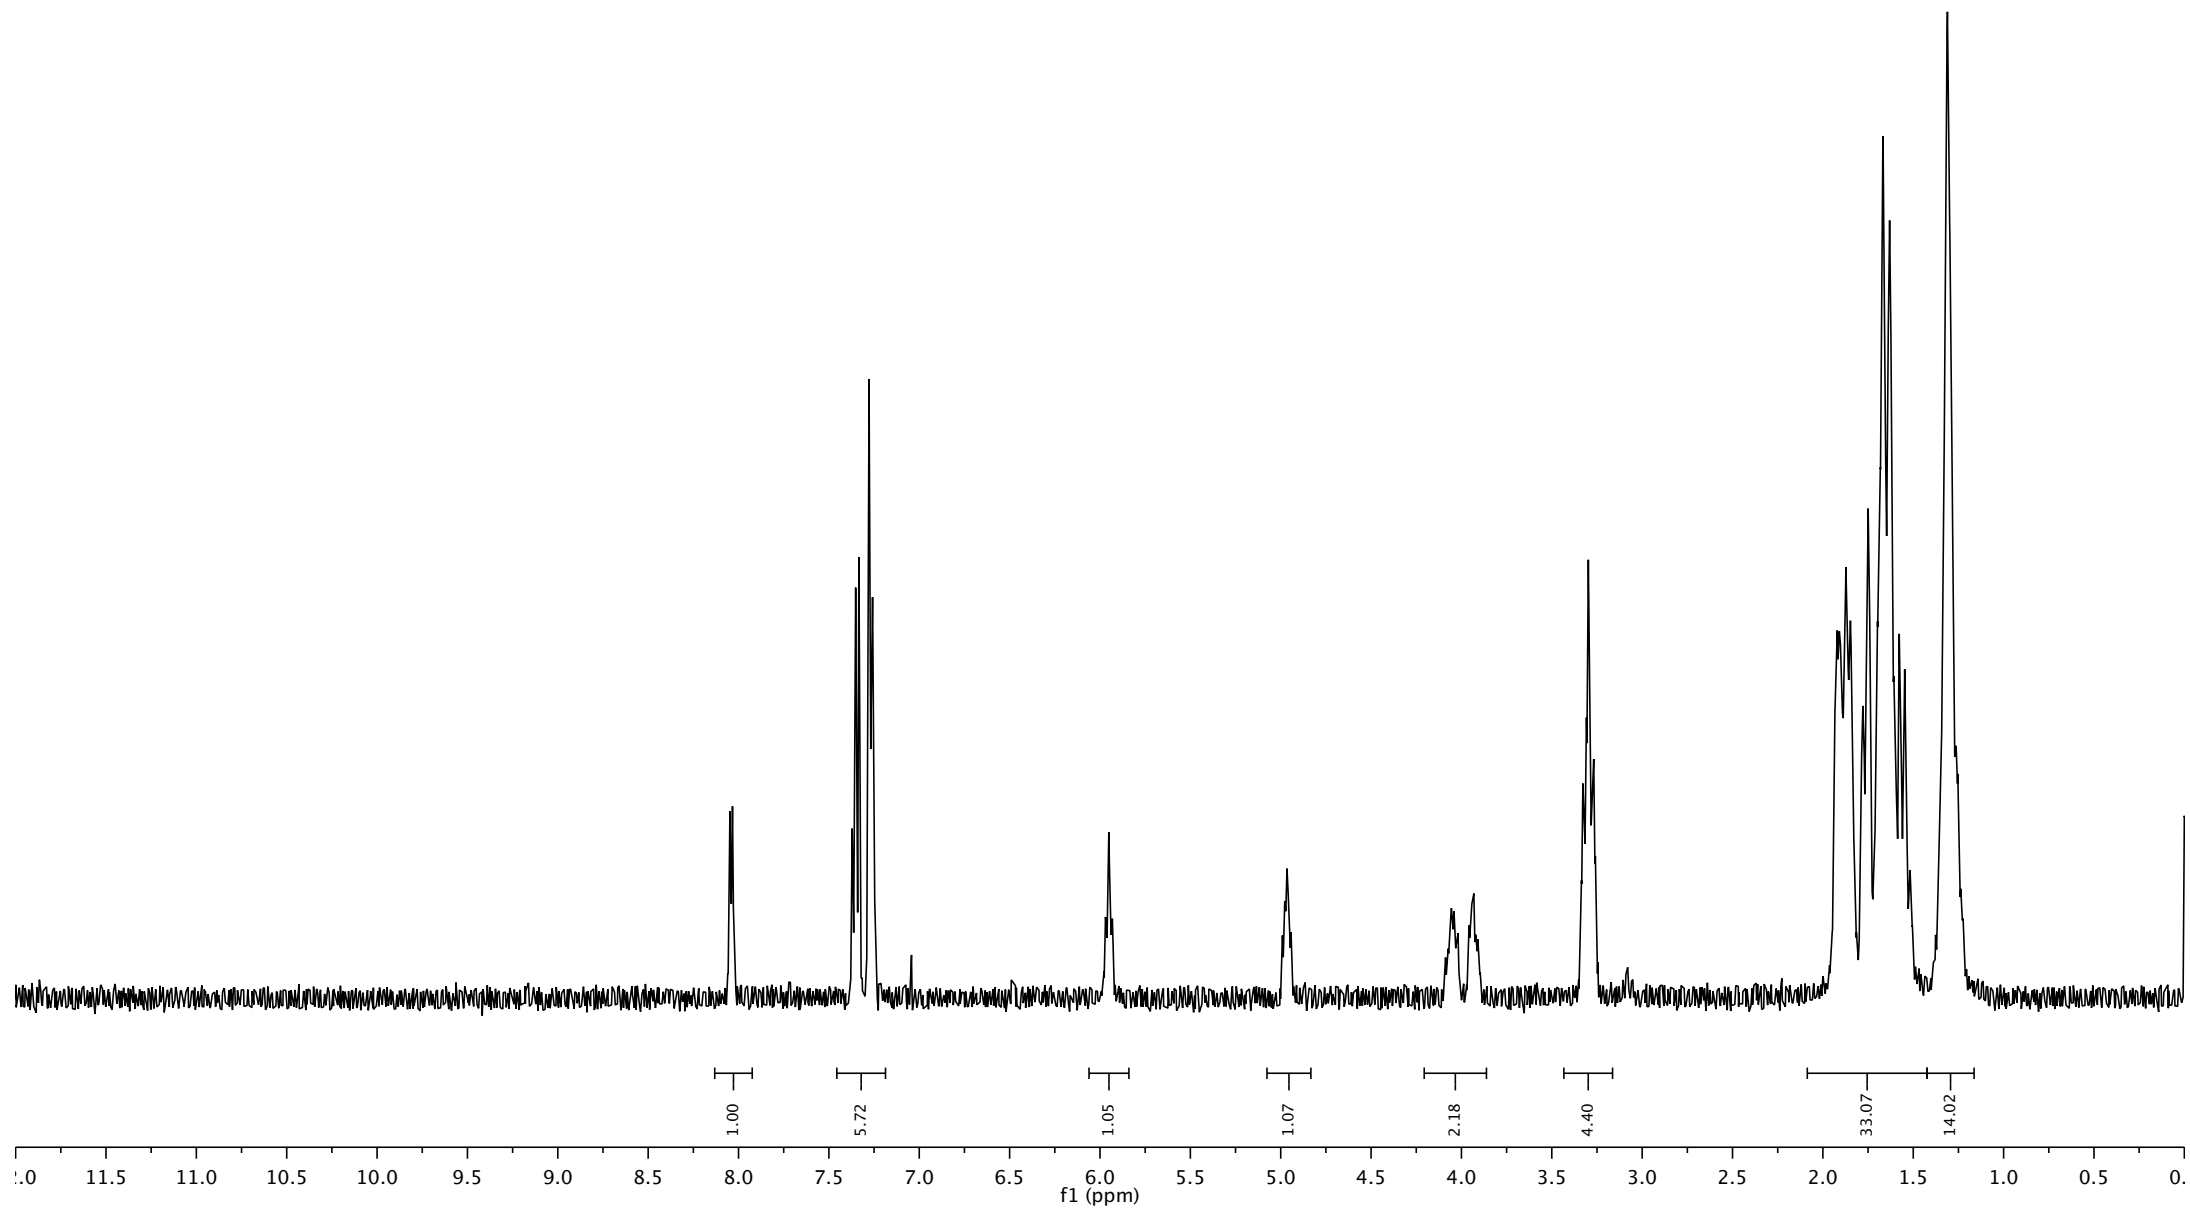

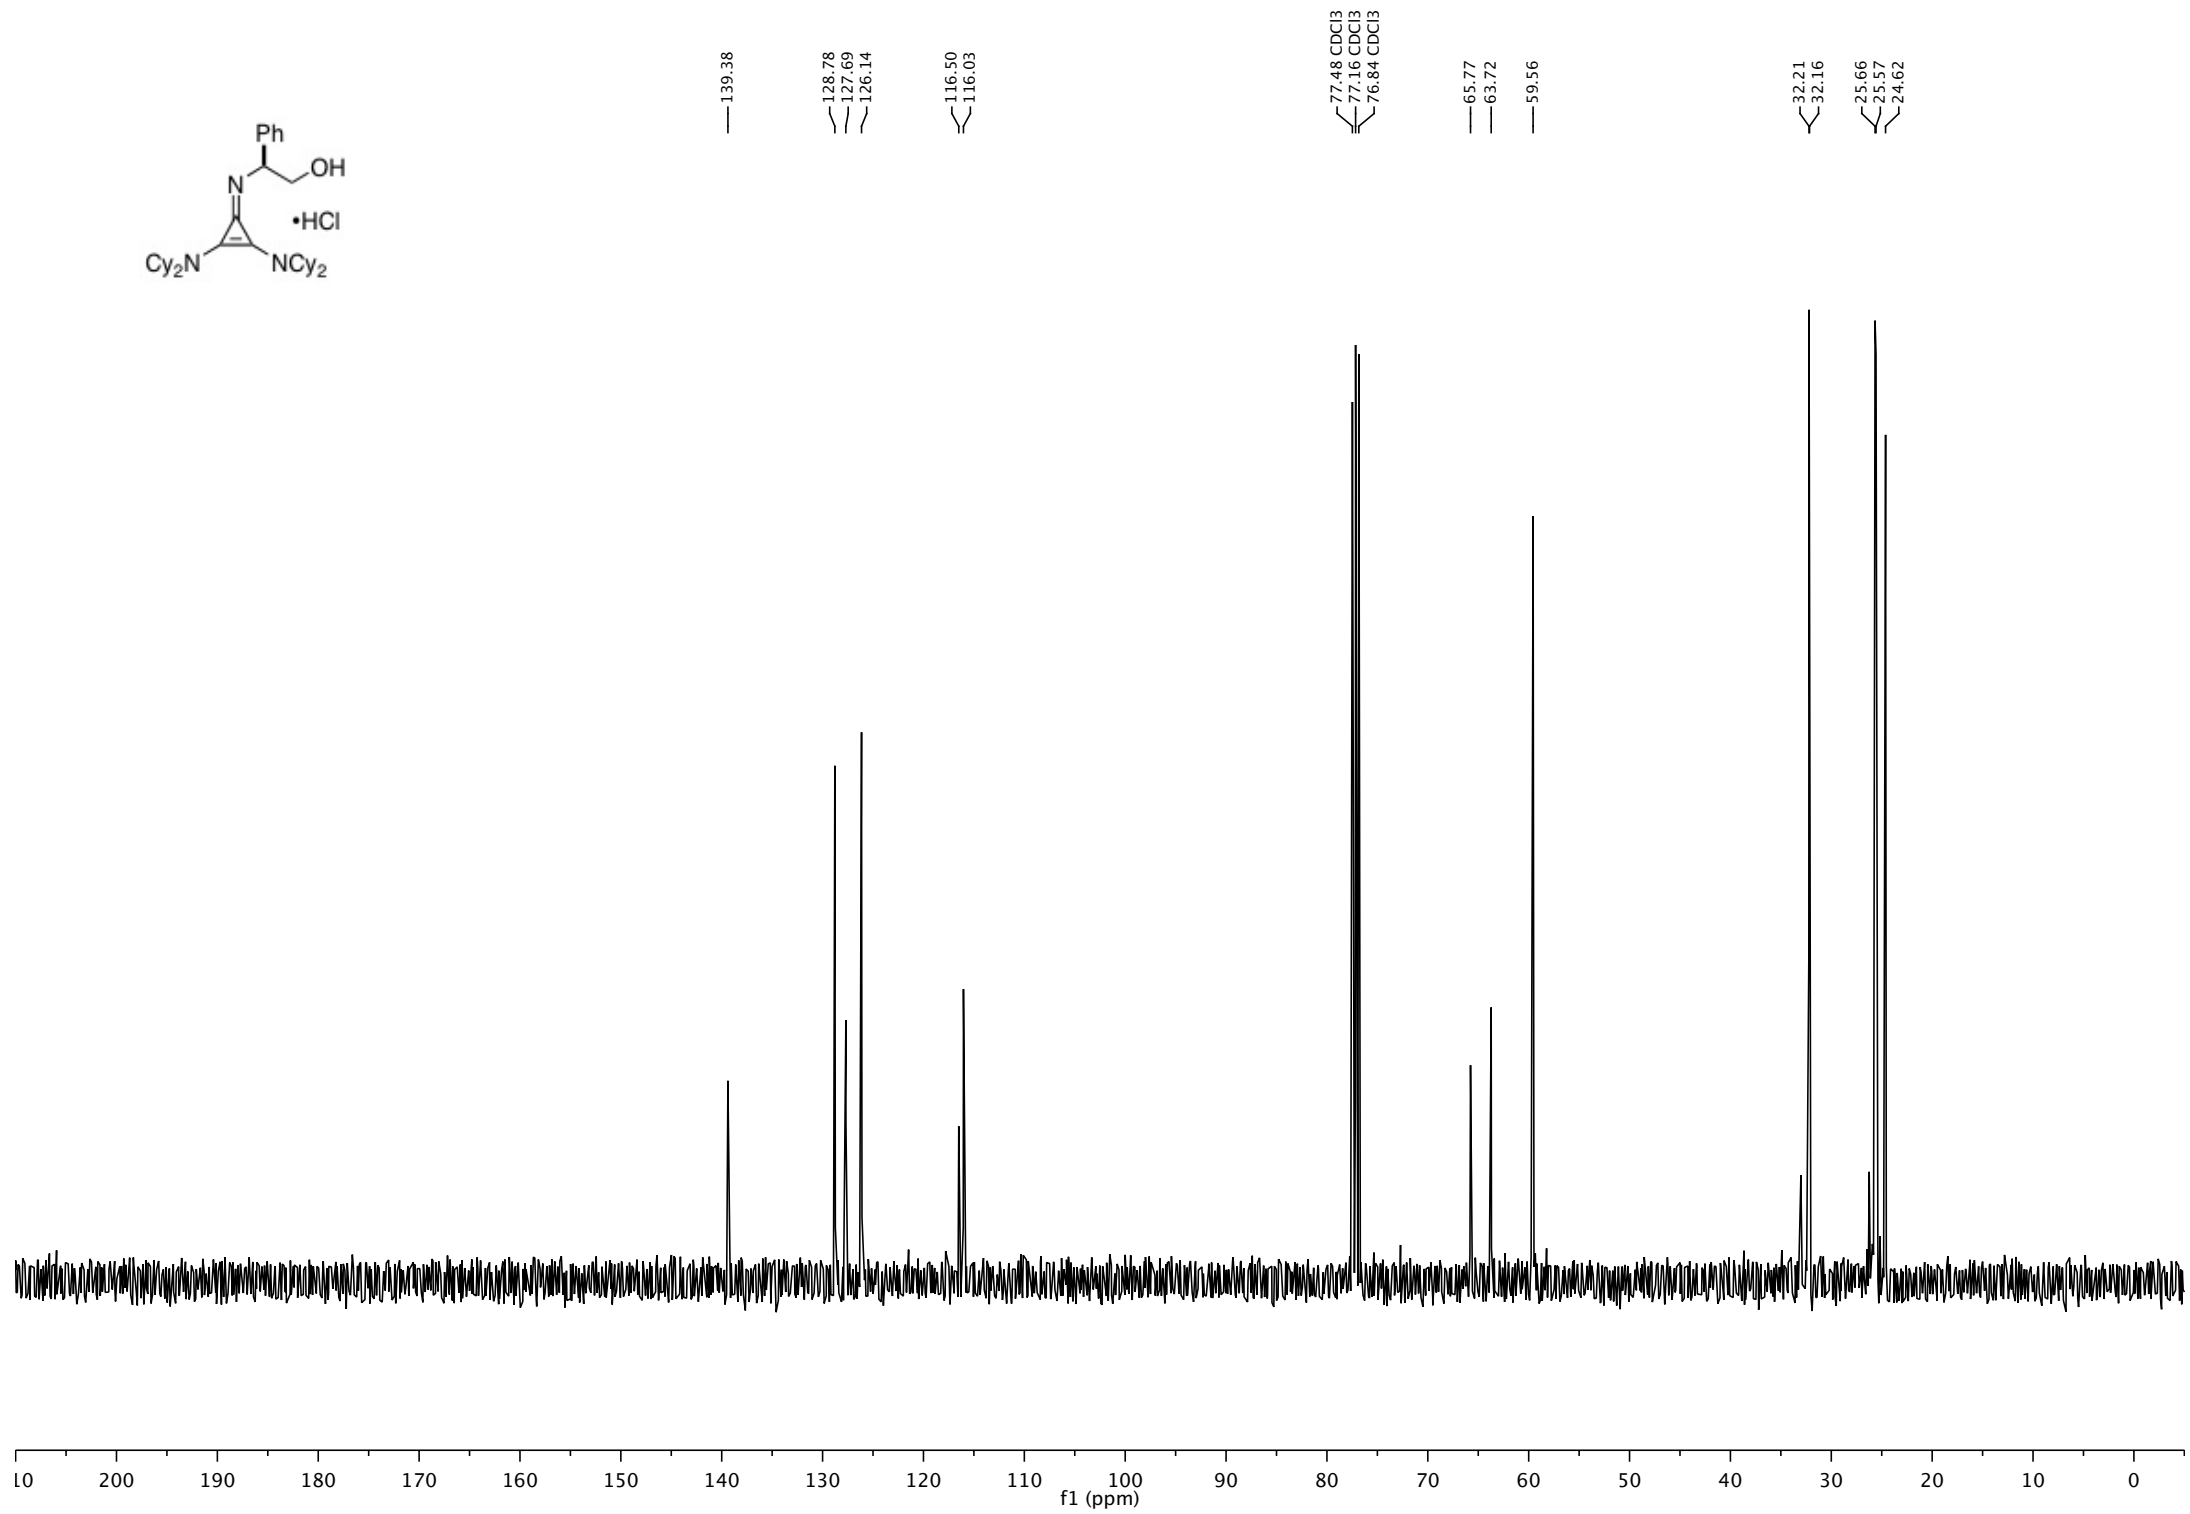

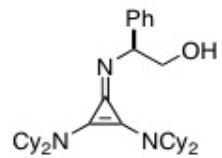

7.36  
7.35  
7.28  
7.27  
7.26  
7.25  
7.16  
7.14

4.70  
4.69  
4.69  
4.67

3.82  
3.81  
3.80  
3.79  
3.40  
3.38  
3.36  
3.10  
3.09  
3.08  
3.07  
3.06

1.82  
1.80  
1.78  
1.78  
1.74  
1.72  
1.71  
1.68  
1.66  
1.62  
1.61  
1.28  
1.25  
1.24  
1.22  
1.21  
1.18  
1.17

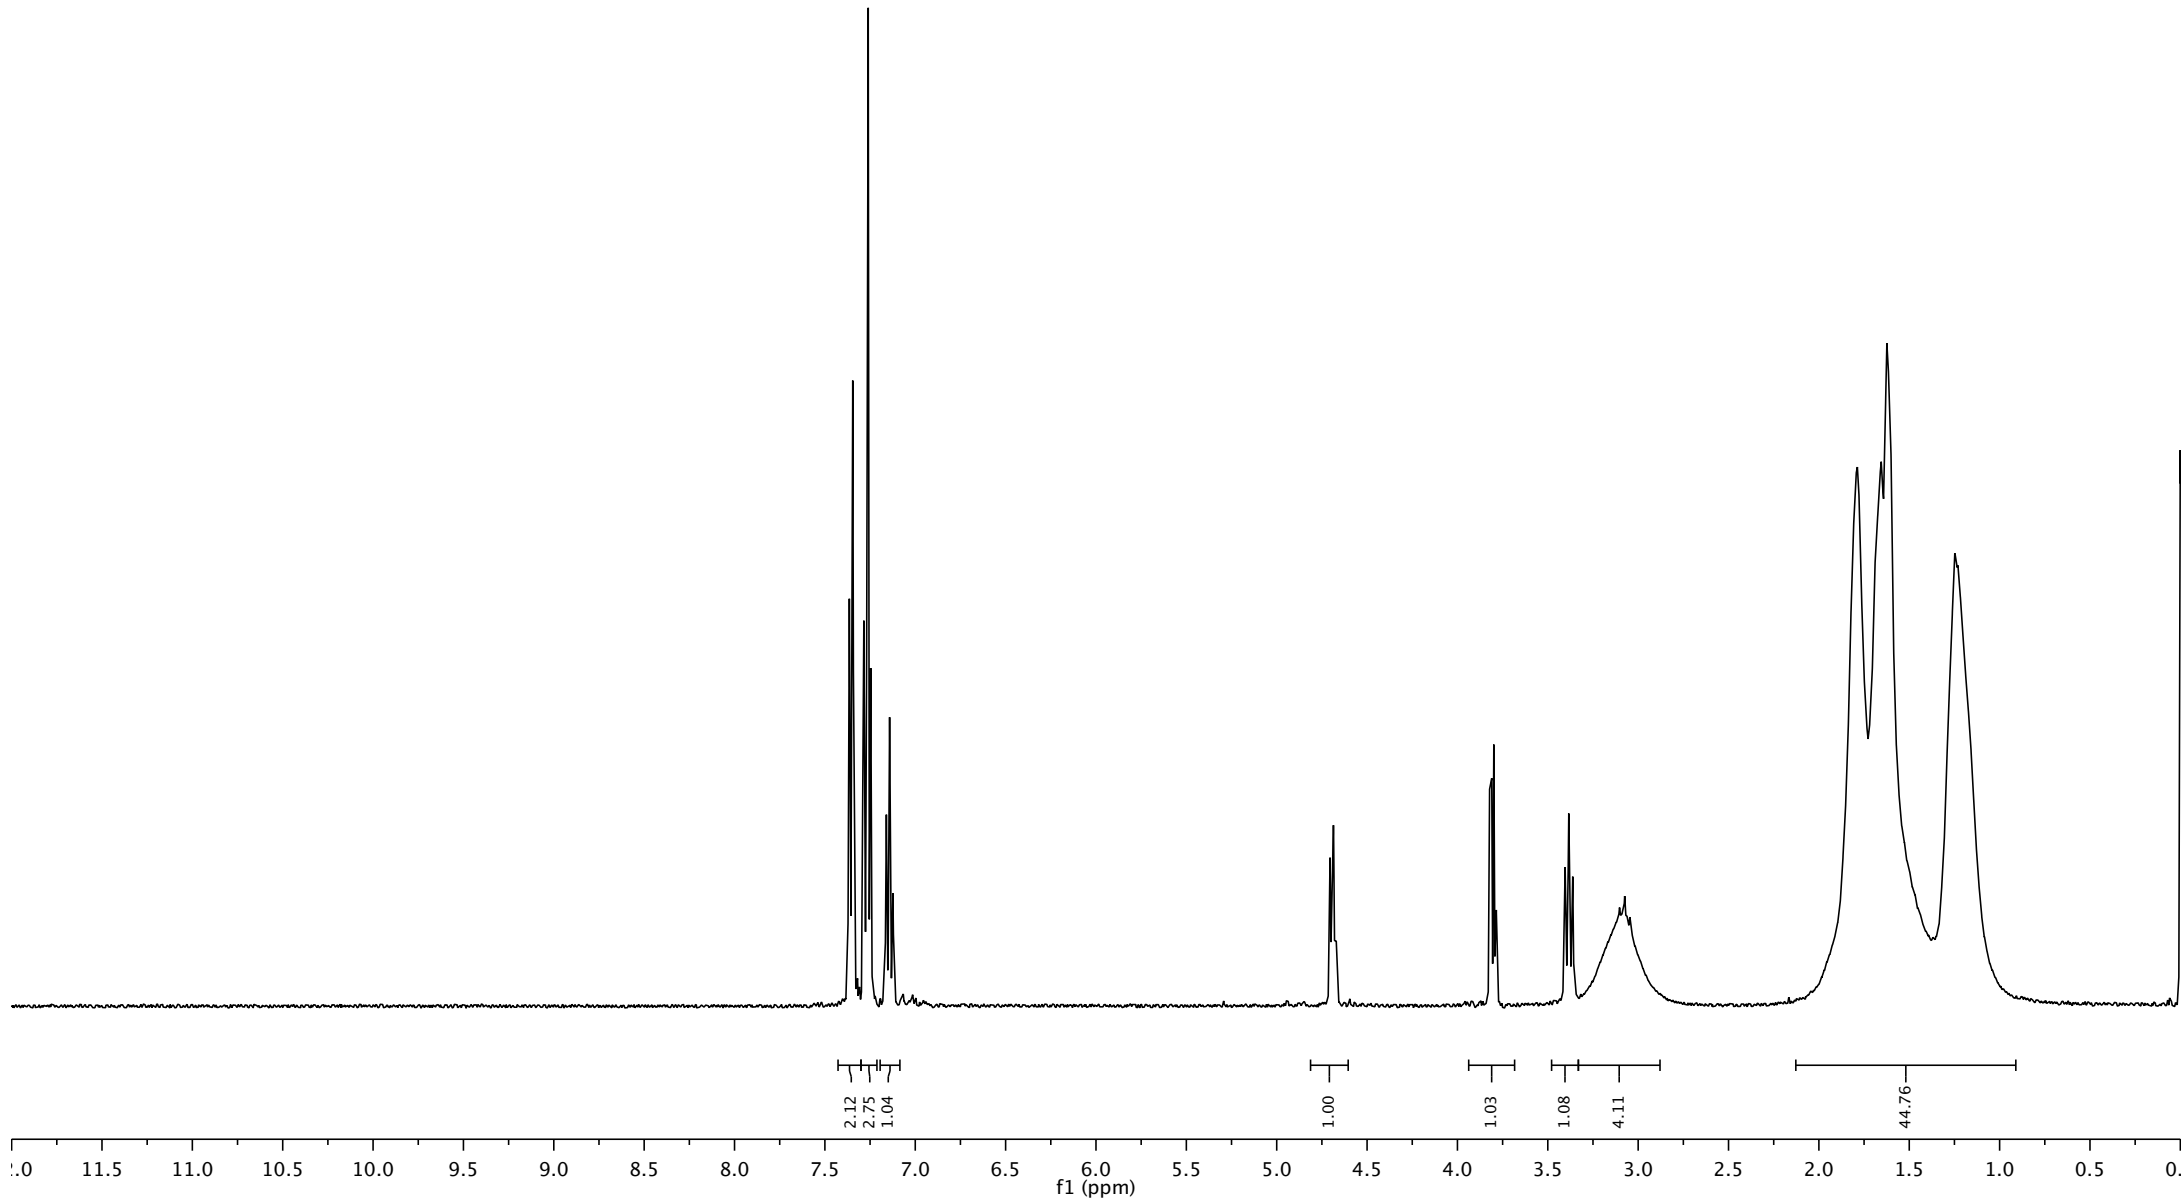

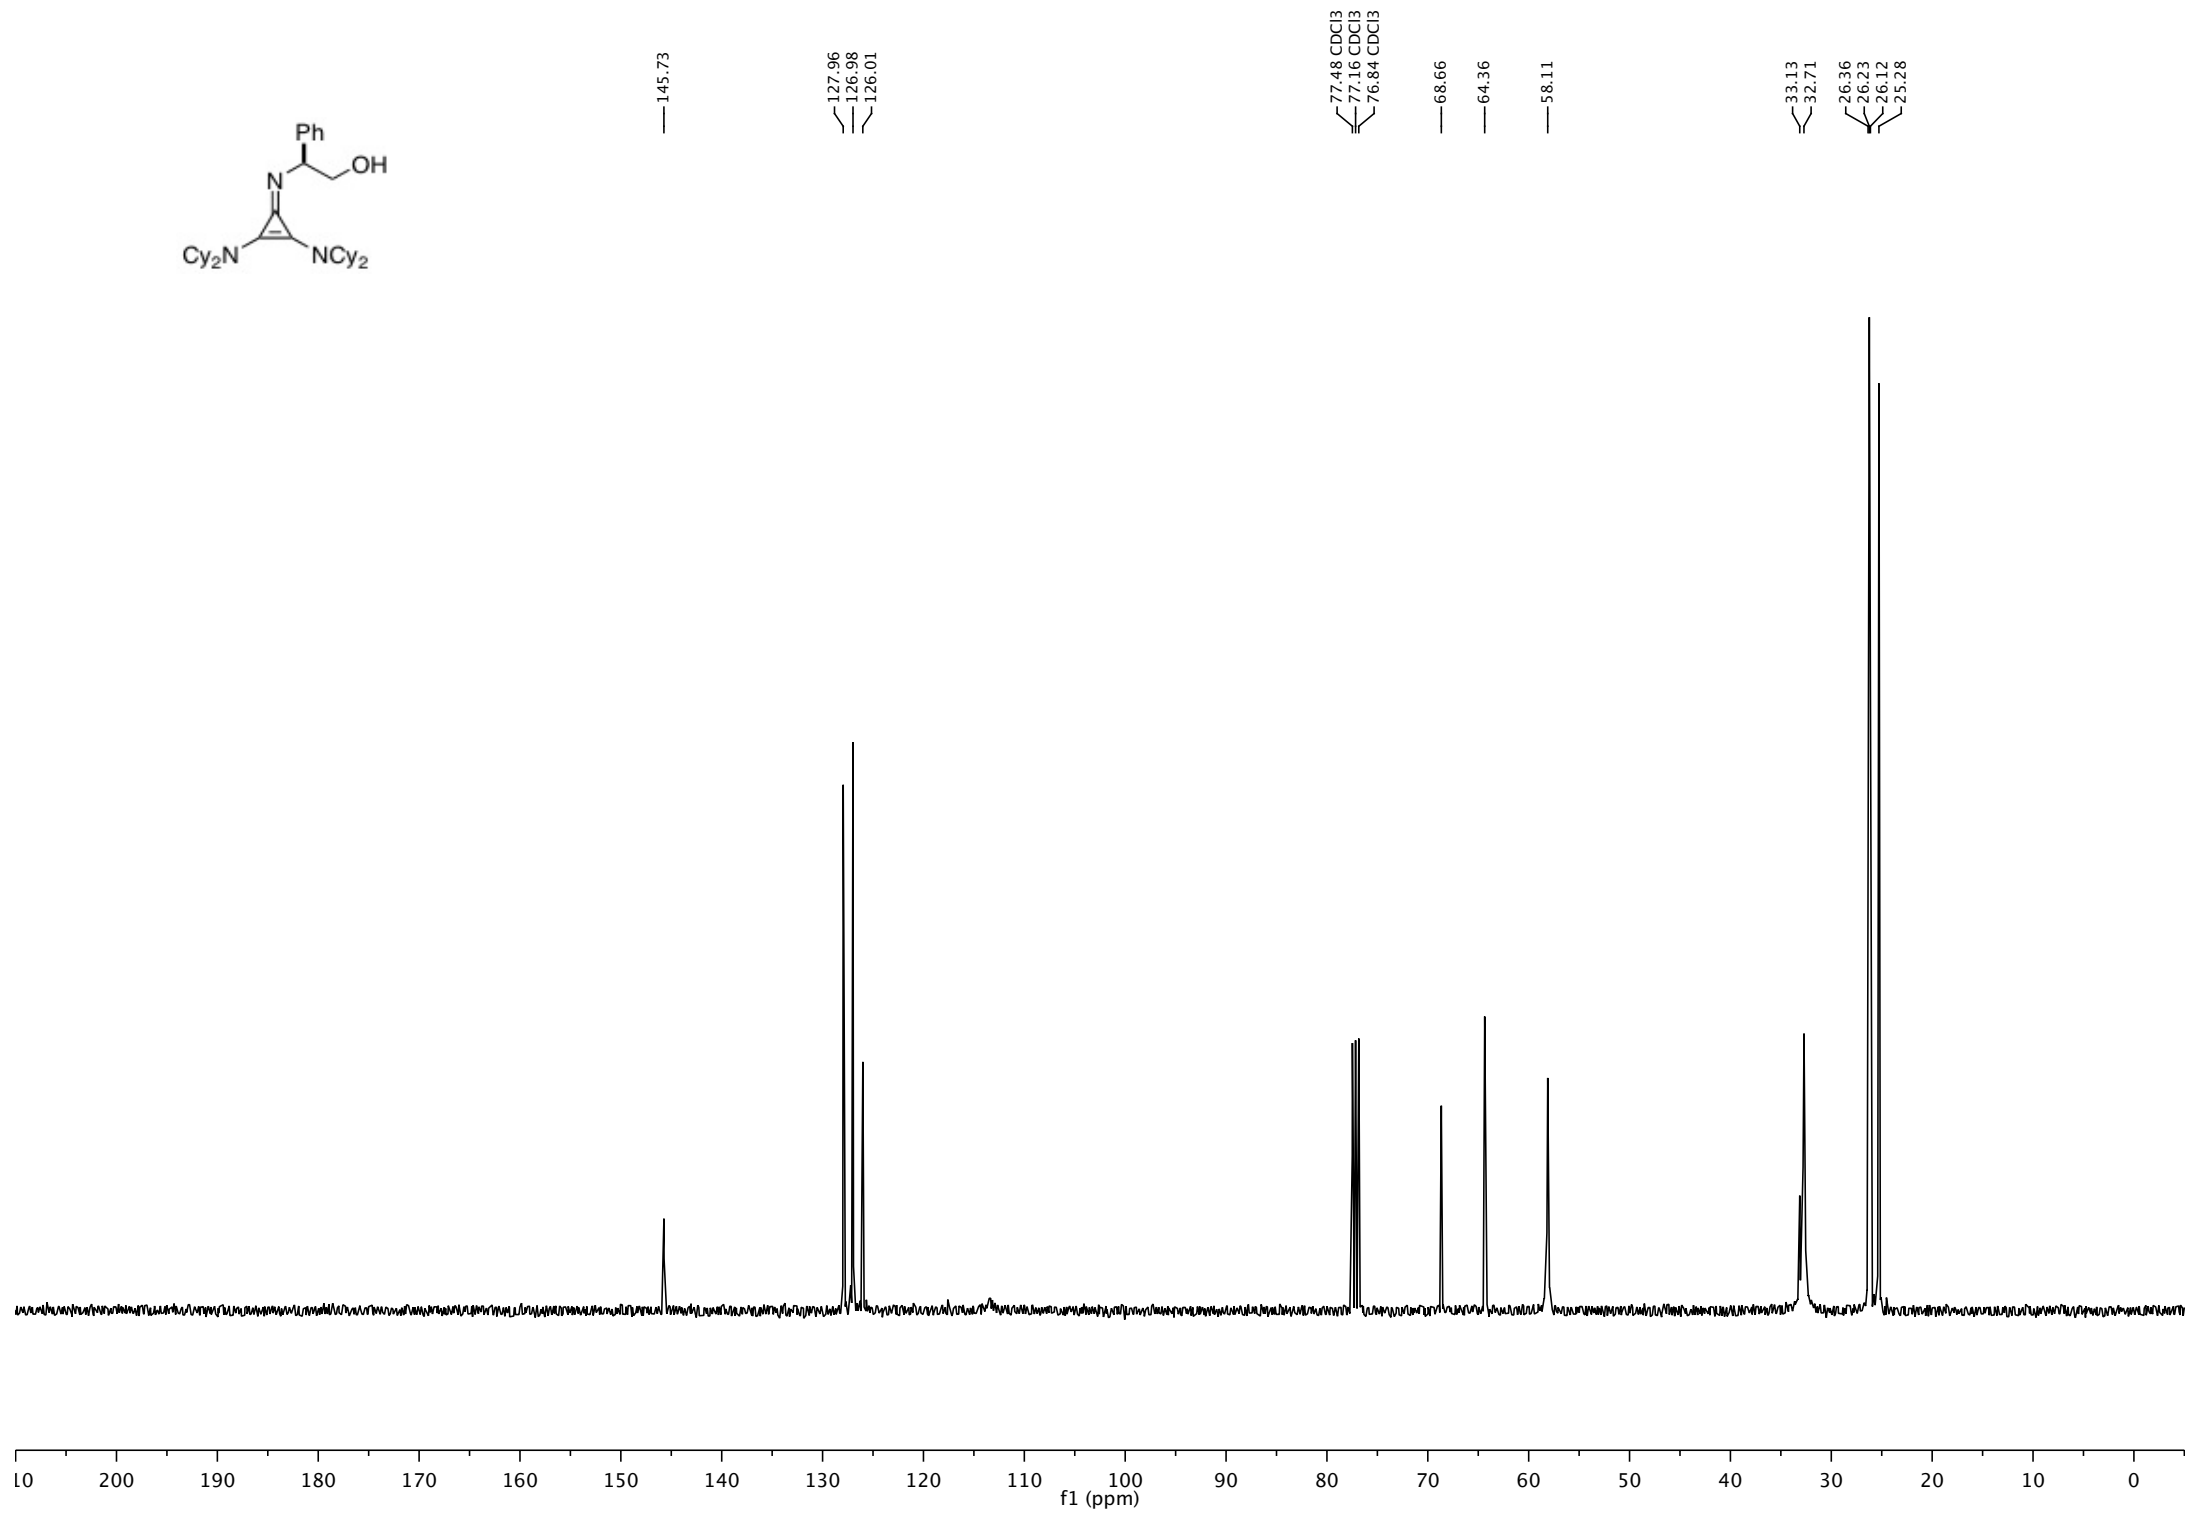



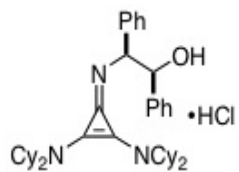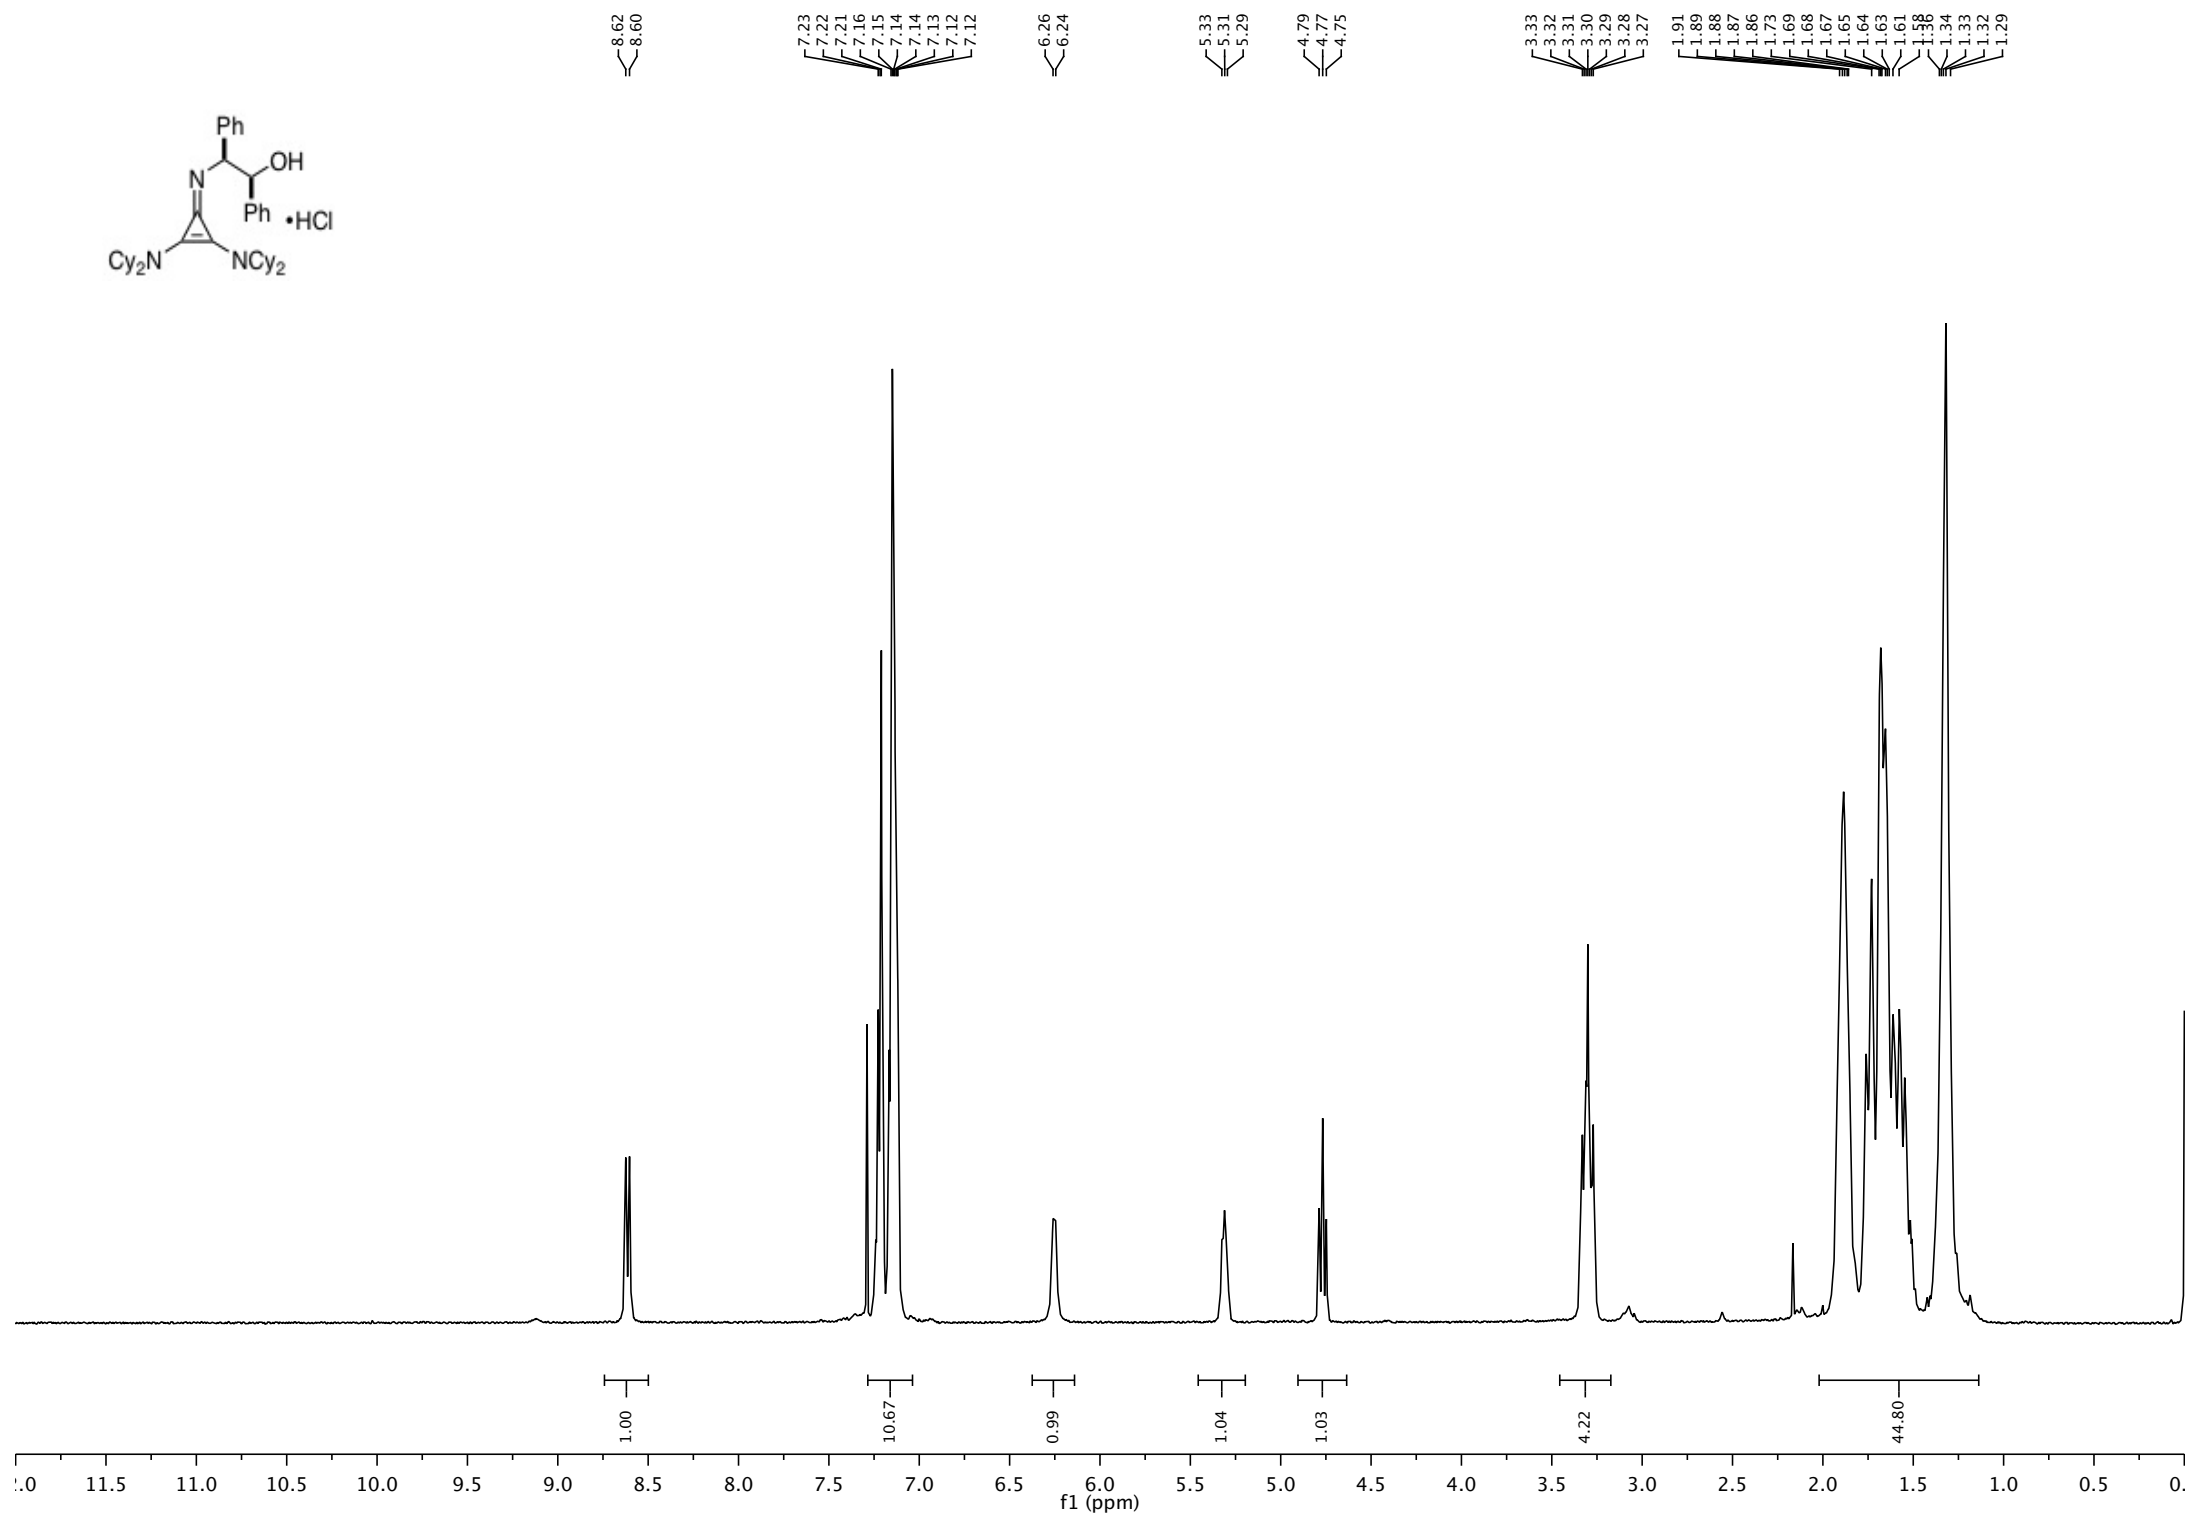

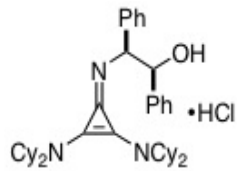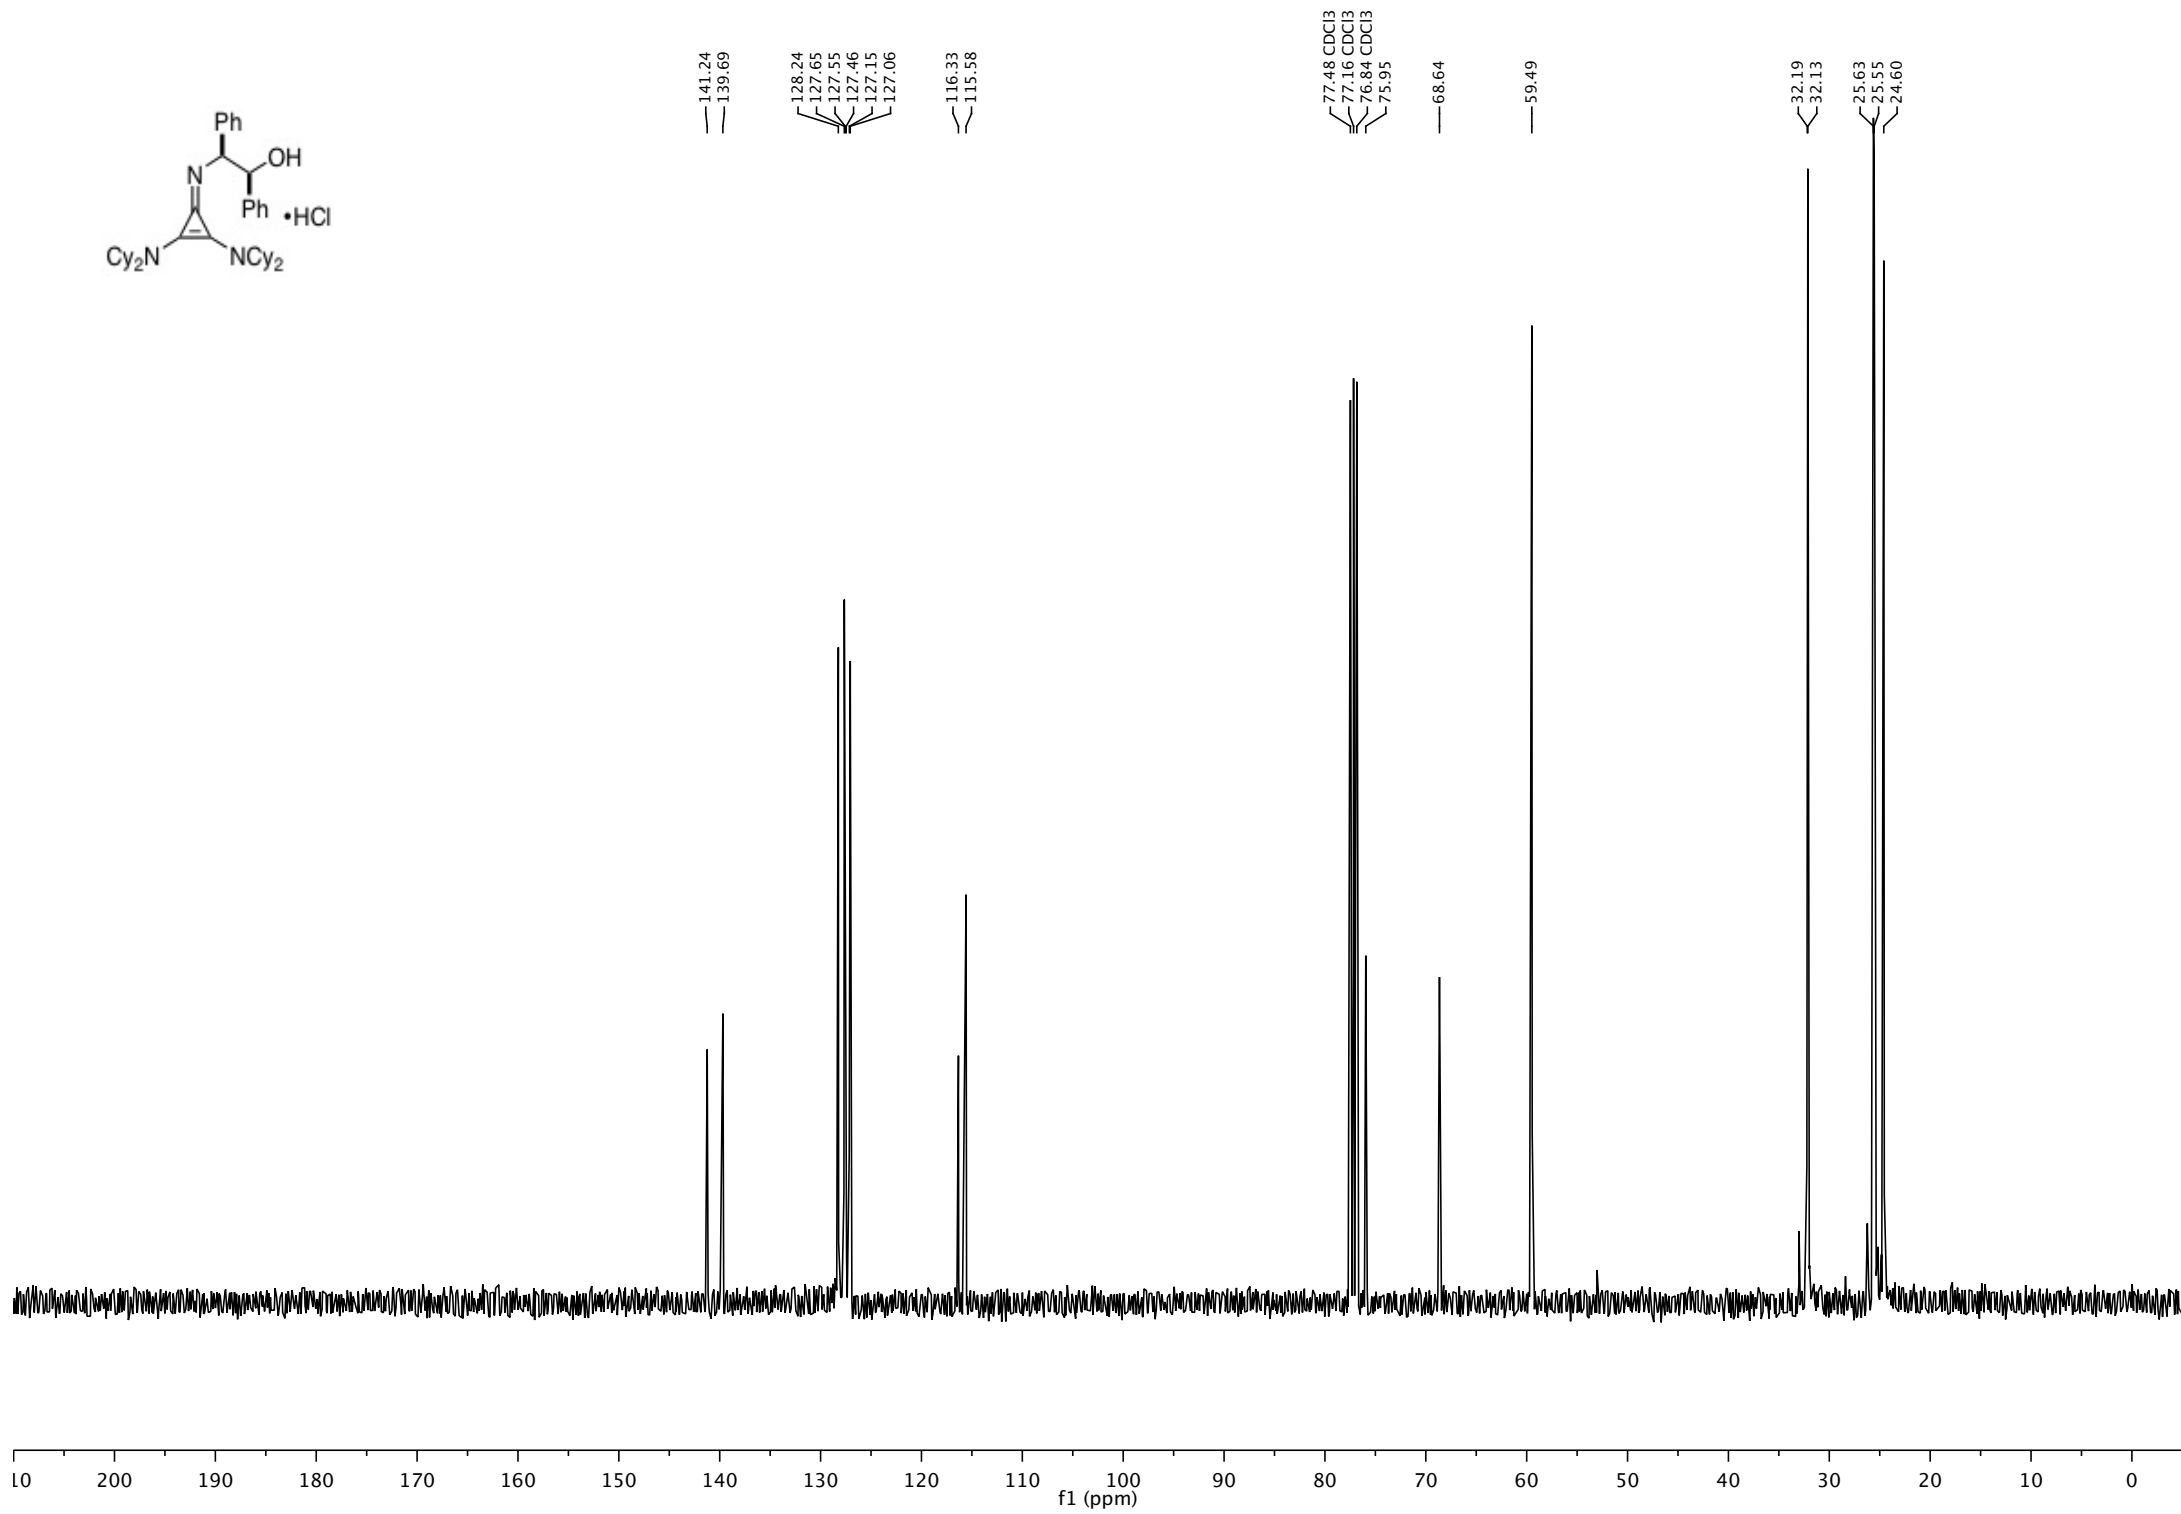

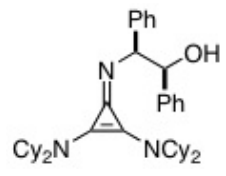

7.26  
7.25  
7.24  
7.23  
7.23  
7.21  
7.19

4.60  
4.59  
4.51  
4.50

3.07  
3.06  
3.06  
3.04  
3.04

1.79  
1.63  
1.62  
1.61  
1.27  
1.25  
1.23  
1.20  
1.18

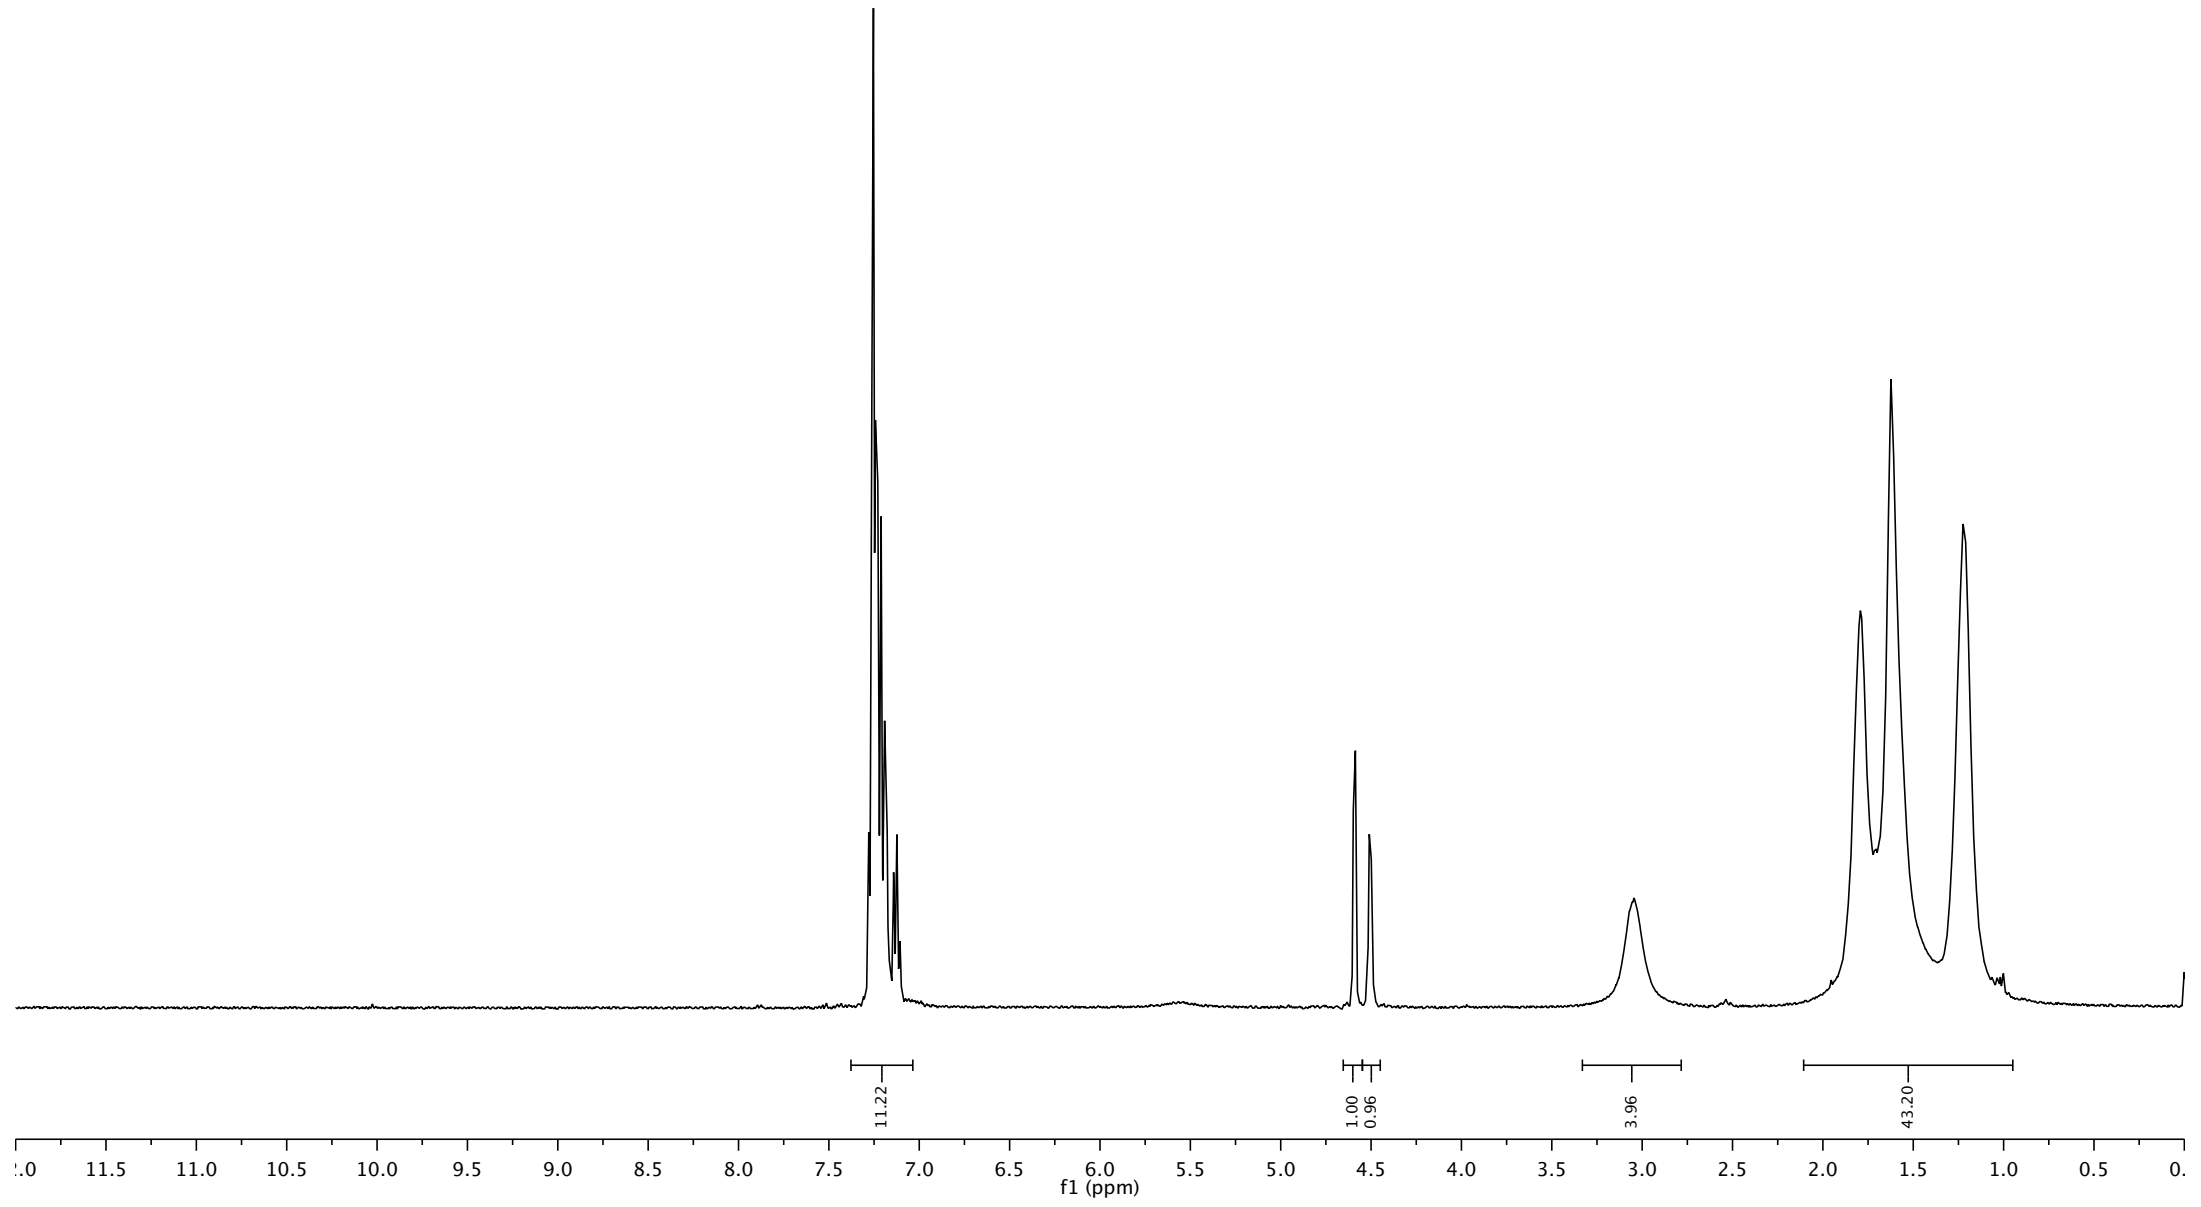

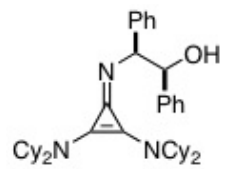

146.23  
144.81

127.67  
127.59  
127.54  
126.85  
126.55  
126.20  
125.94

79.15

70.38

58.09

32.62

26.20  
26.14  
25.25

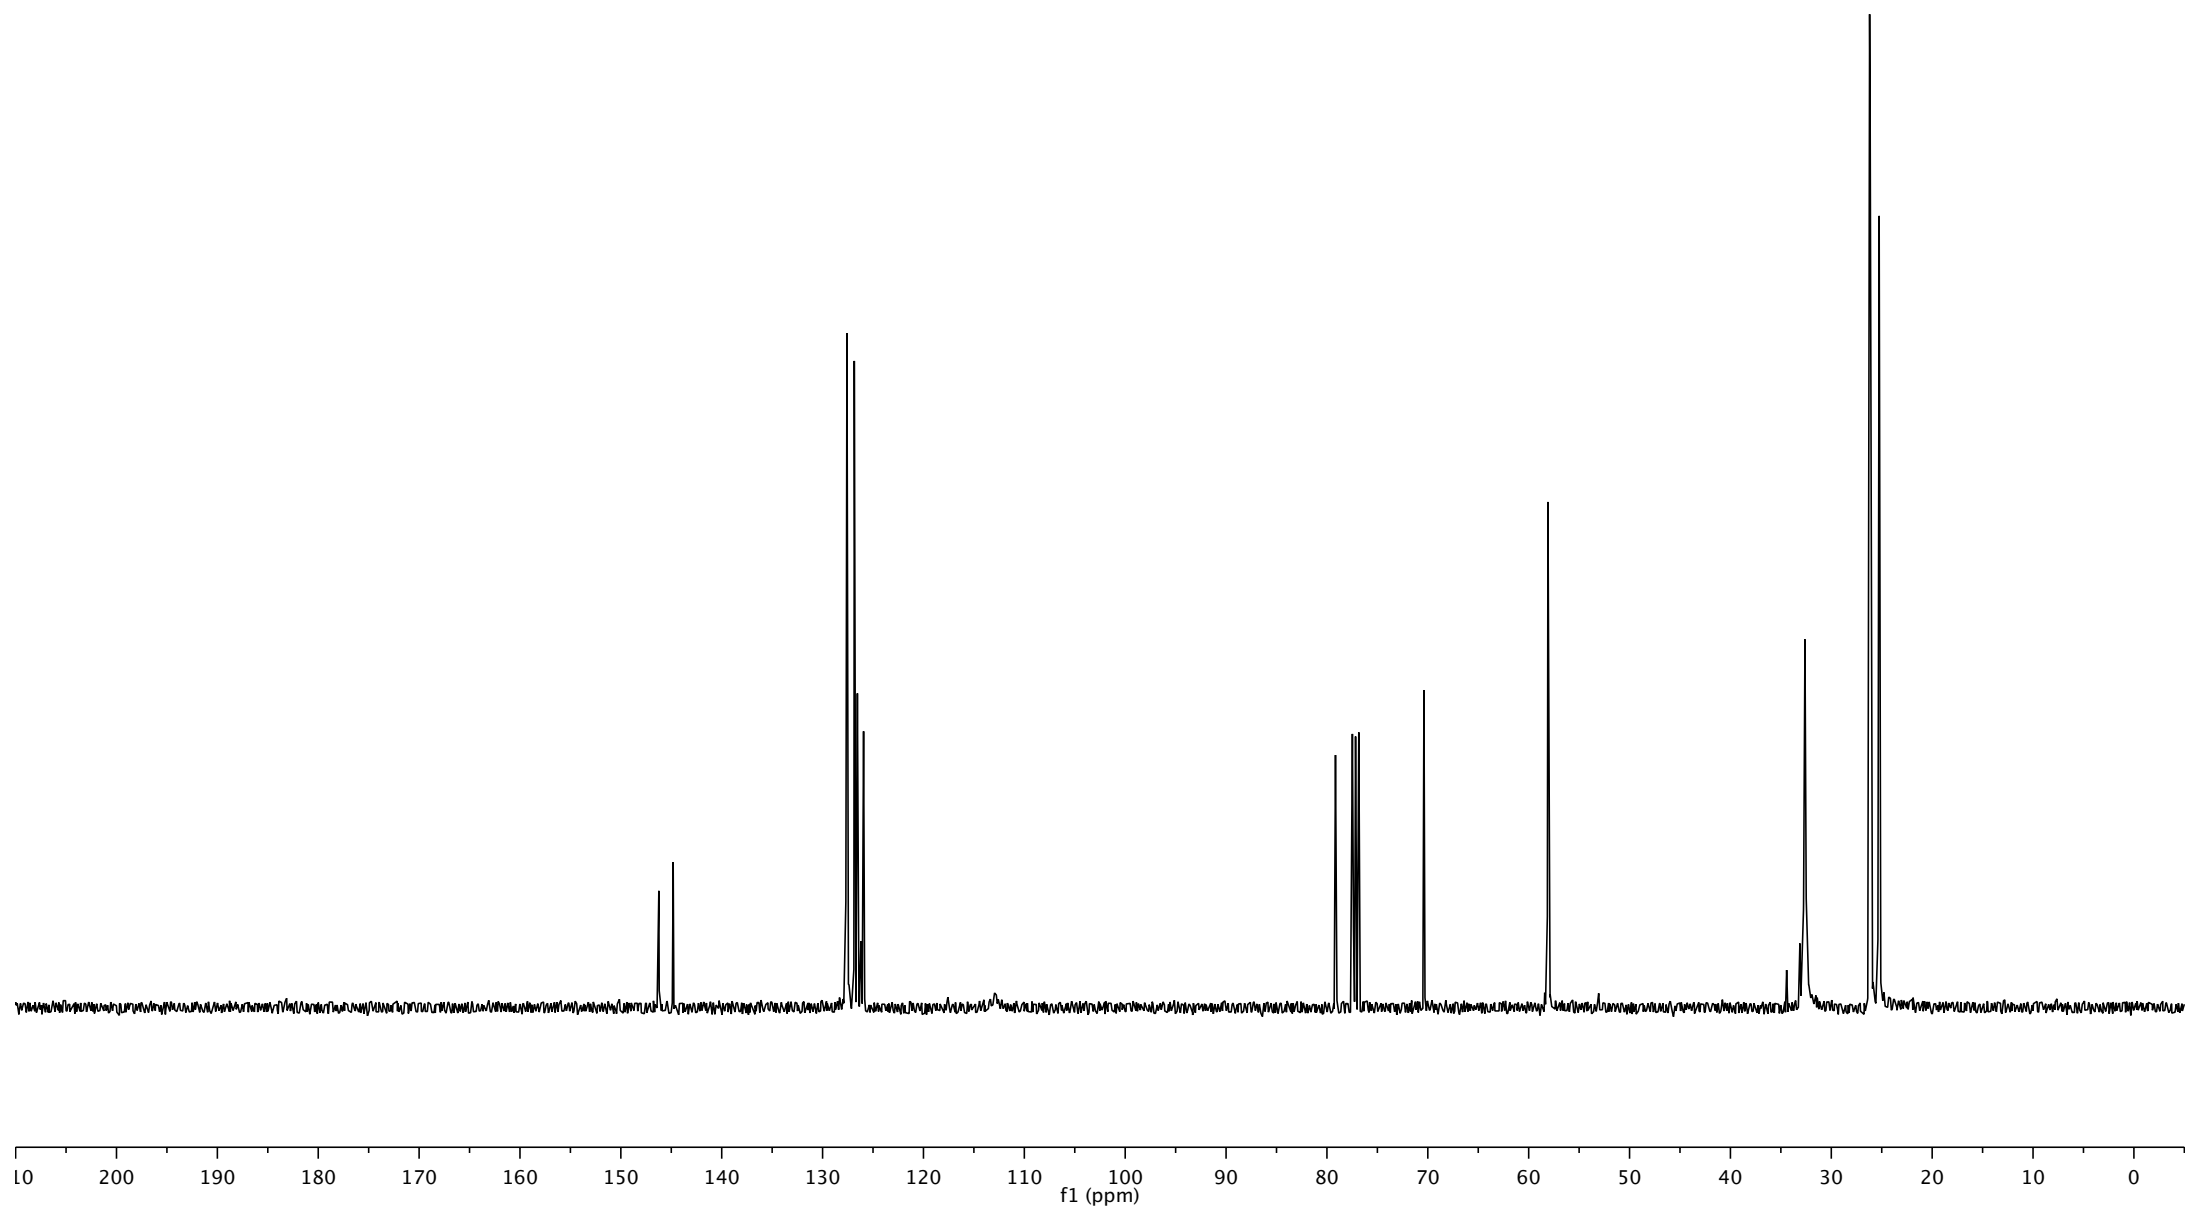

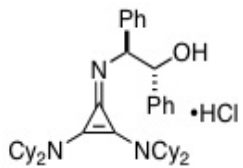

7.33  
7.31  
7.28  
7.22  
7.21  
7.20  
7.16  
7.16  
7.15  
7.14  
7.14  
7.13  
7.02  
7.01  
7.00  
6.99  
6.70  
6.68

5.69  
5.27  
5.26  
5.25  
5.24

3.33  
3.31  
3.30  
3.29  
3.27

1.82  
1.79  
1.69  
1.66  
1.62  
1.29  
1.27  
1.26  
1.24  
1.24

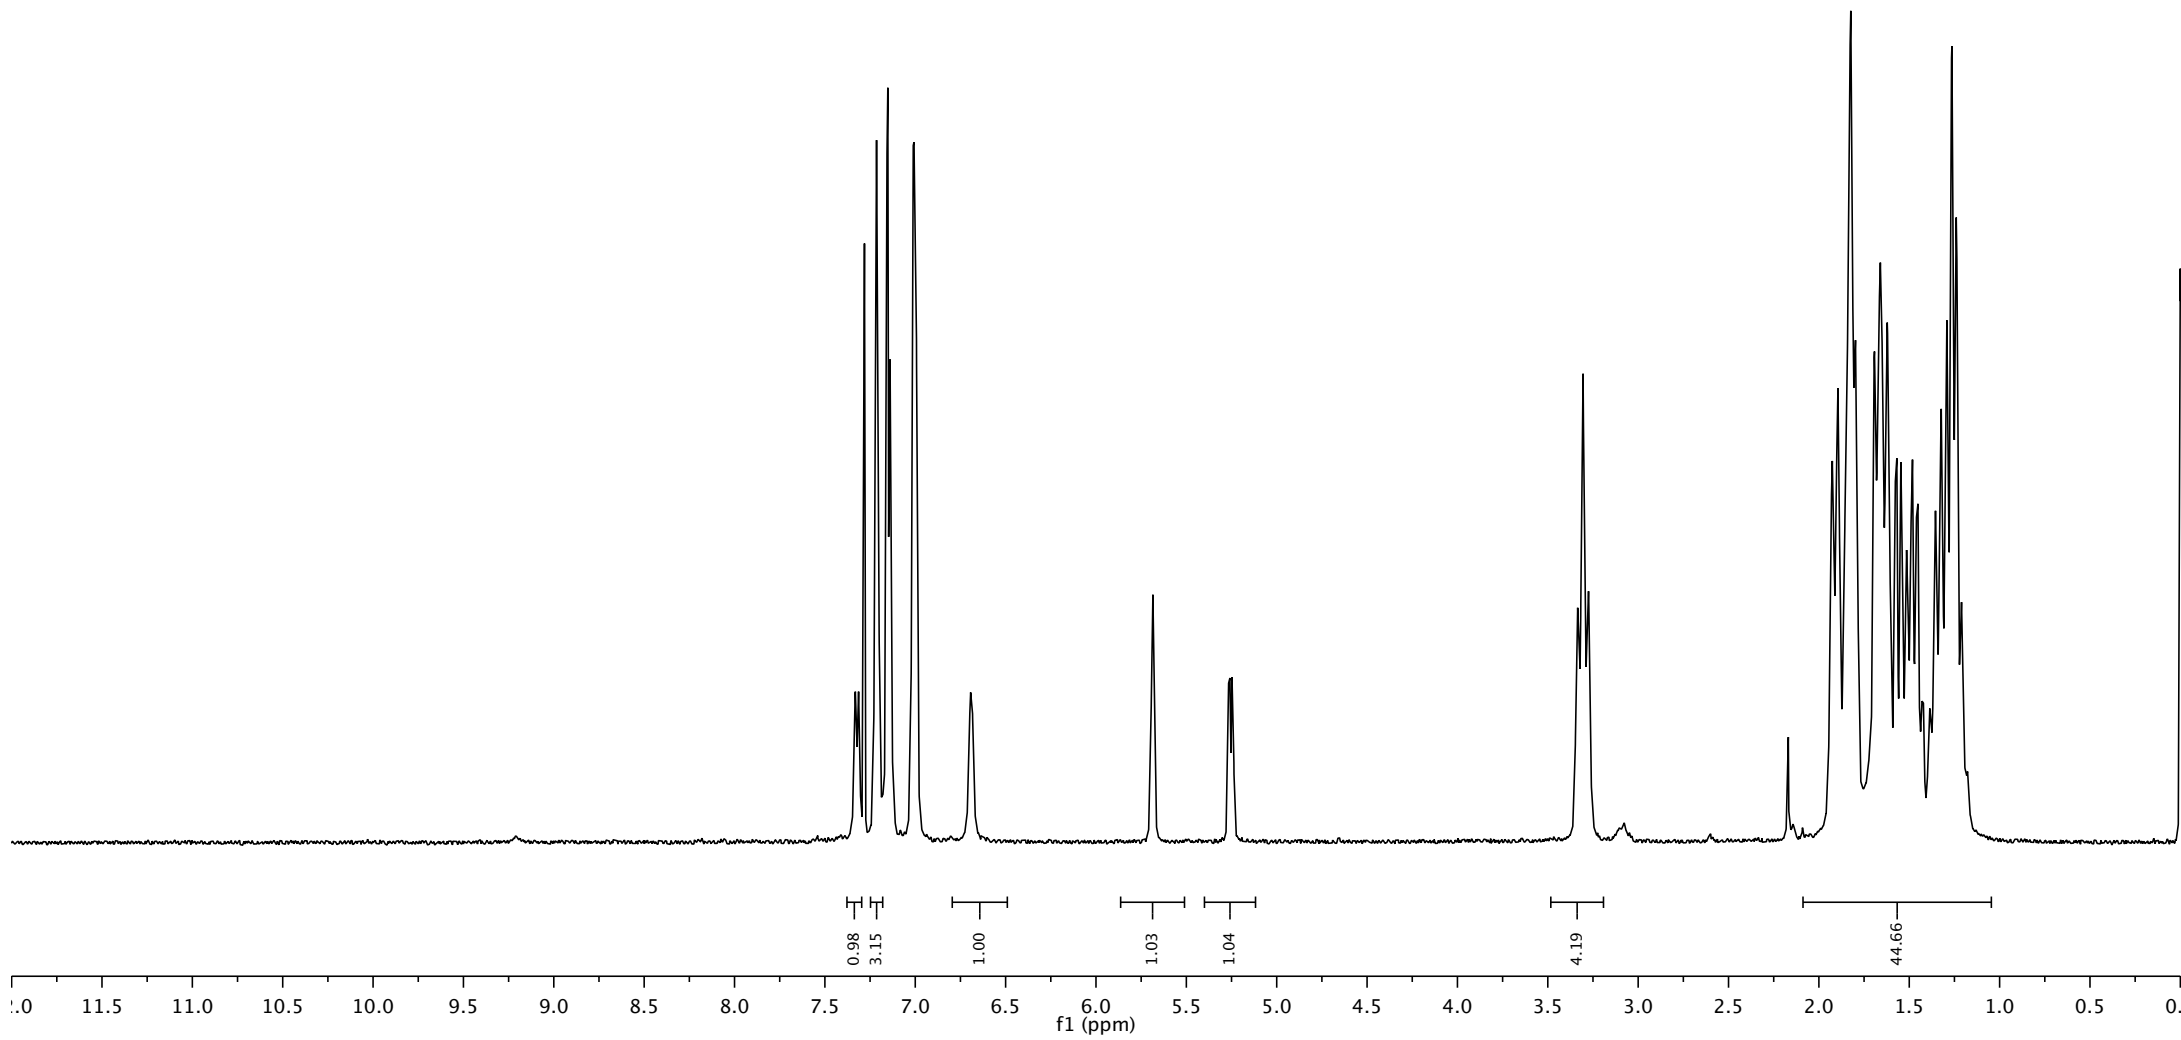

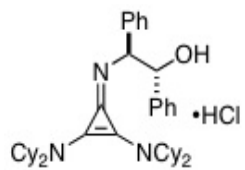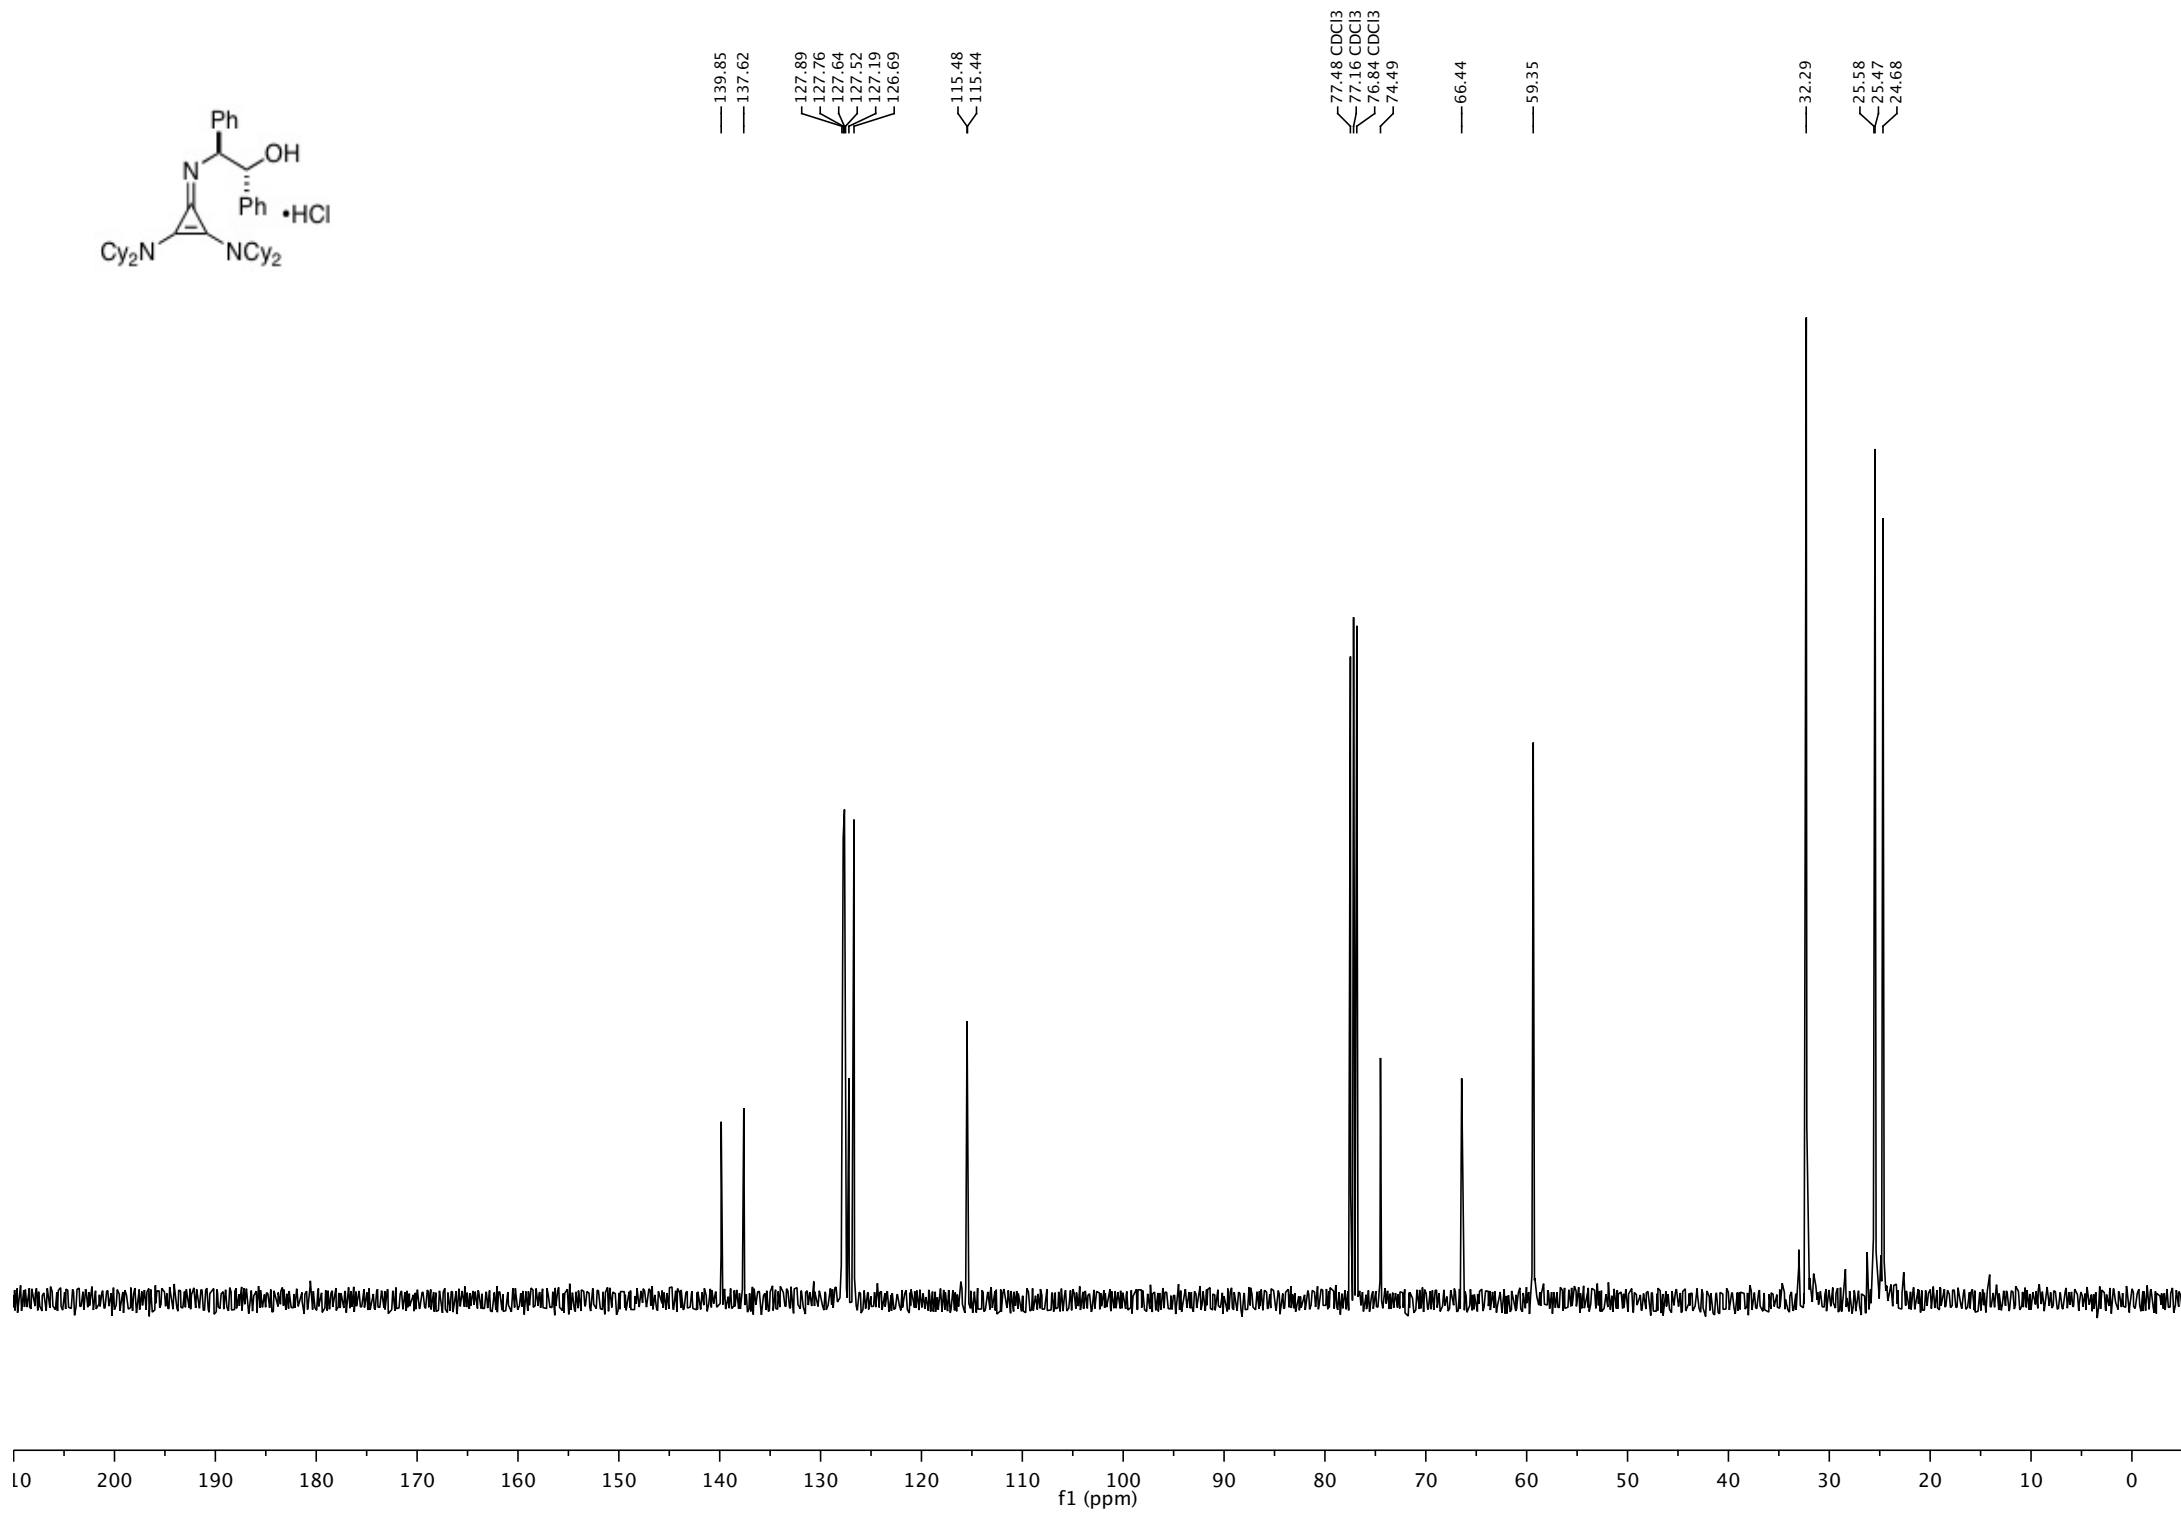

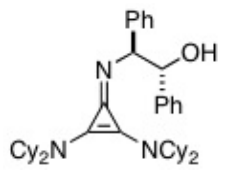

7.08  
7.07  
7.07  
7.03  
7.02  
7.02  
7.00  
7.00  
6.95  
6.95  
6.94

4.95  
4.94

3.22  
3.19  
3.00

1.90  
1.88  
1.77  
1.70  
1.66  
1.31  
1.29  
1.25  
1.24

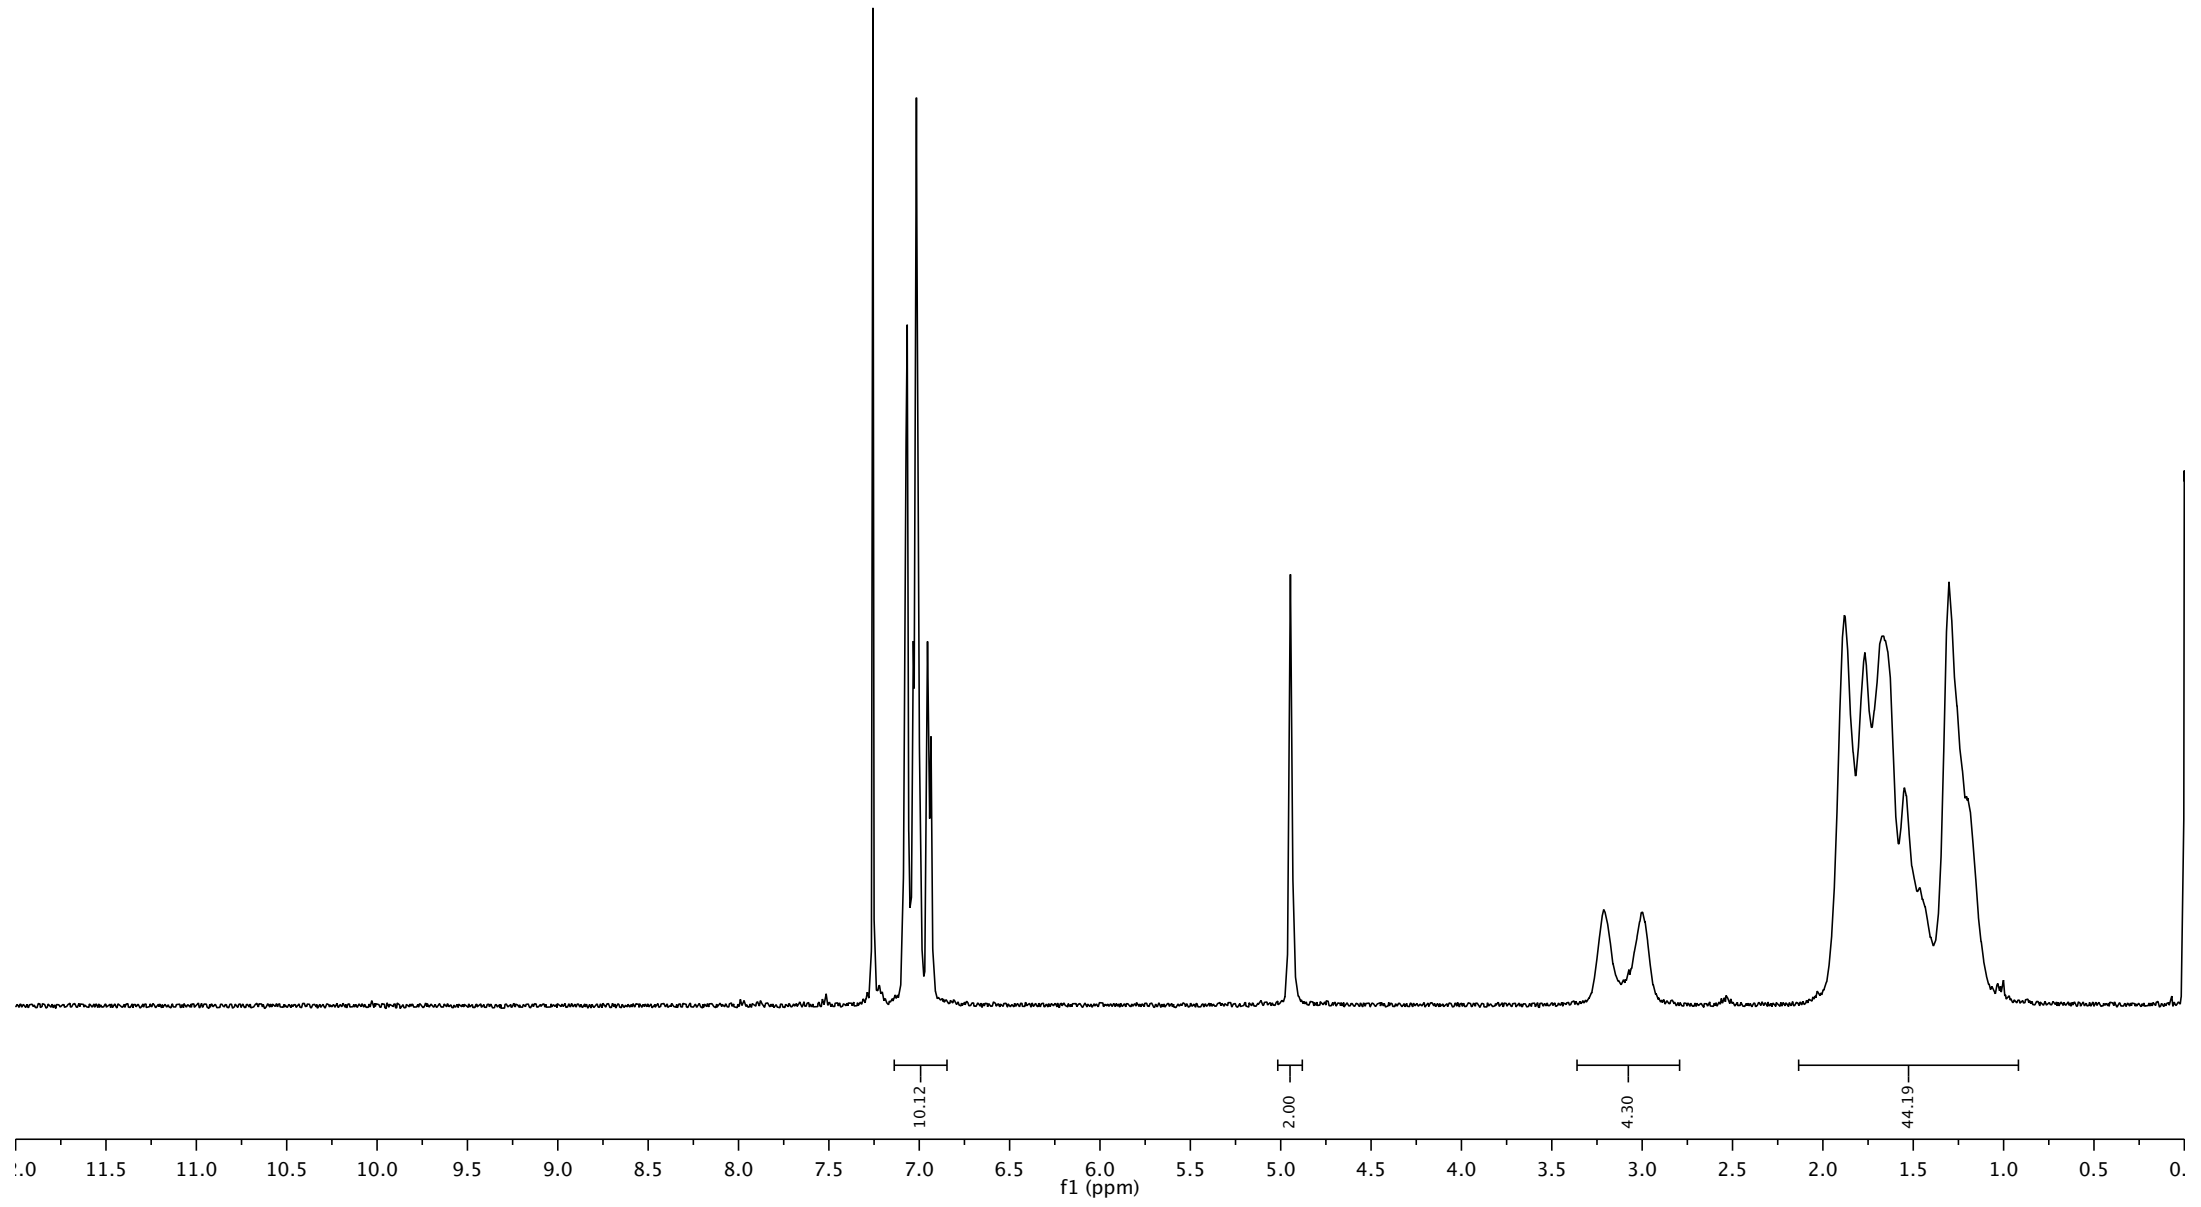

1.0 11.5 11.0 10.5 10.0 9.5 9.0 8.5 8.0 7.5 7.0 6.5 6.0 5.5 5.0 4.5 4.0 3.5 3.0 2.5 2.0 1.5 1.0 0.5 0.0

f1 (ppm)

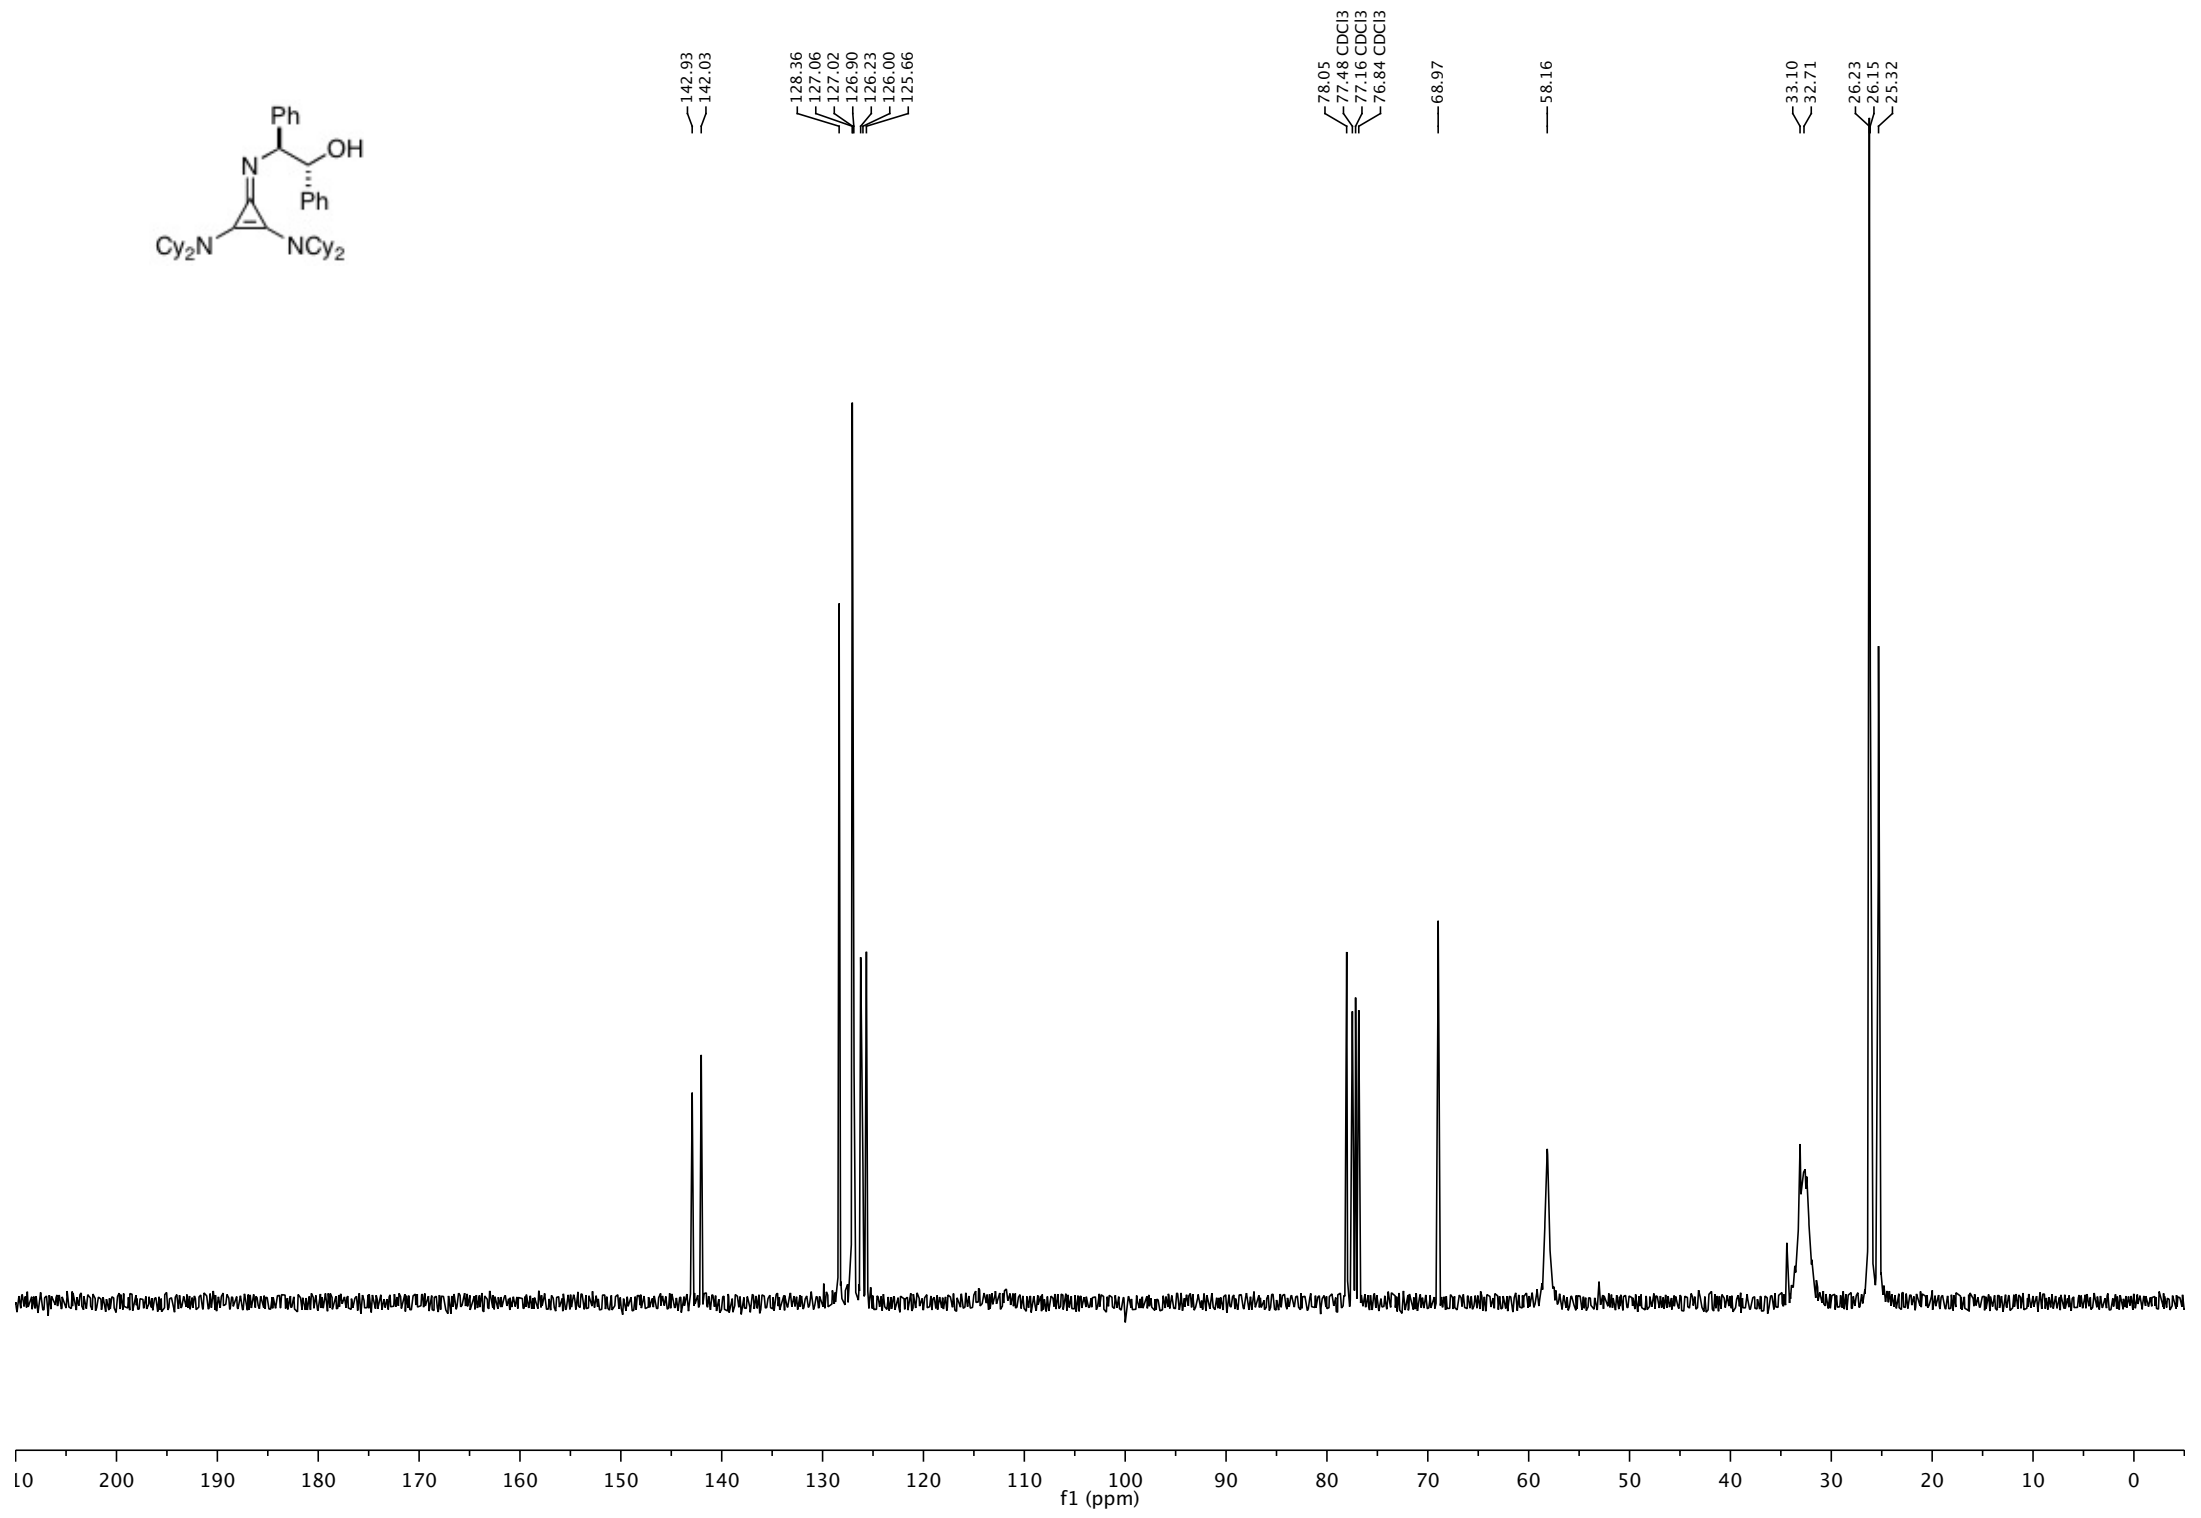



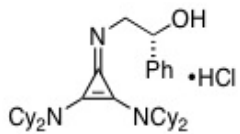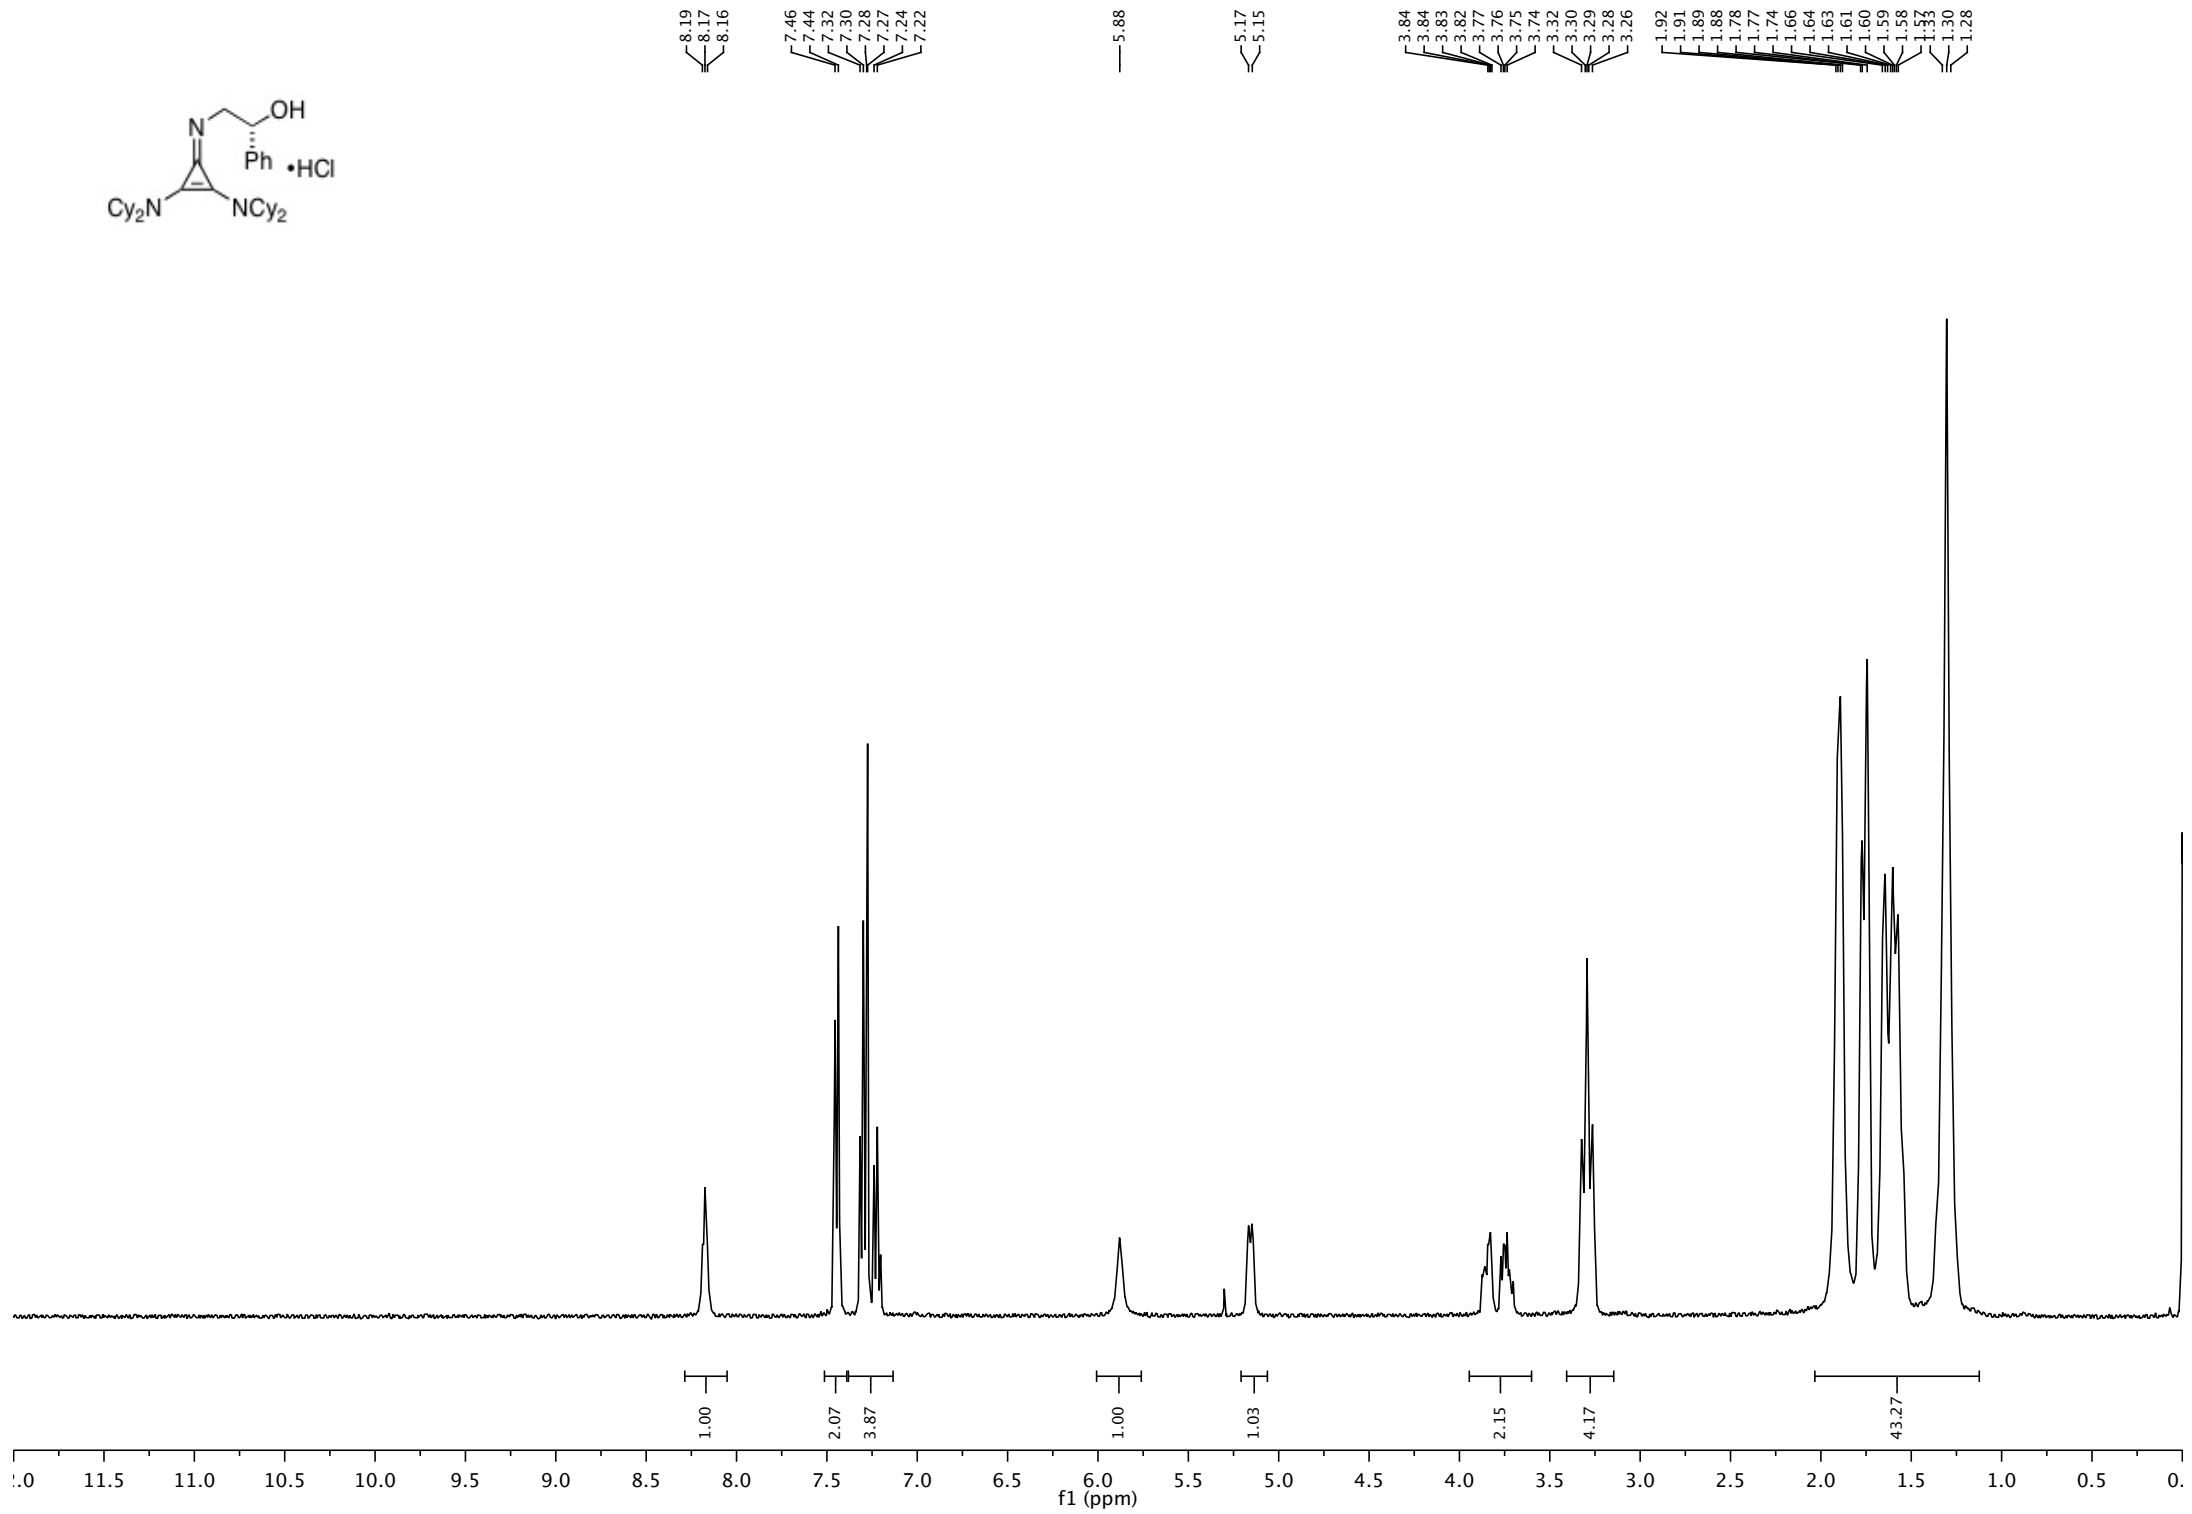

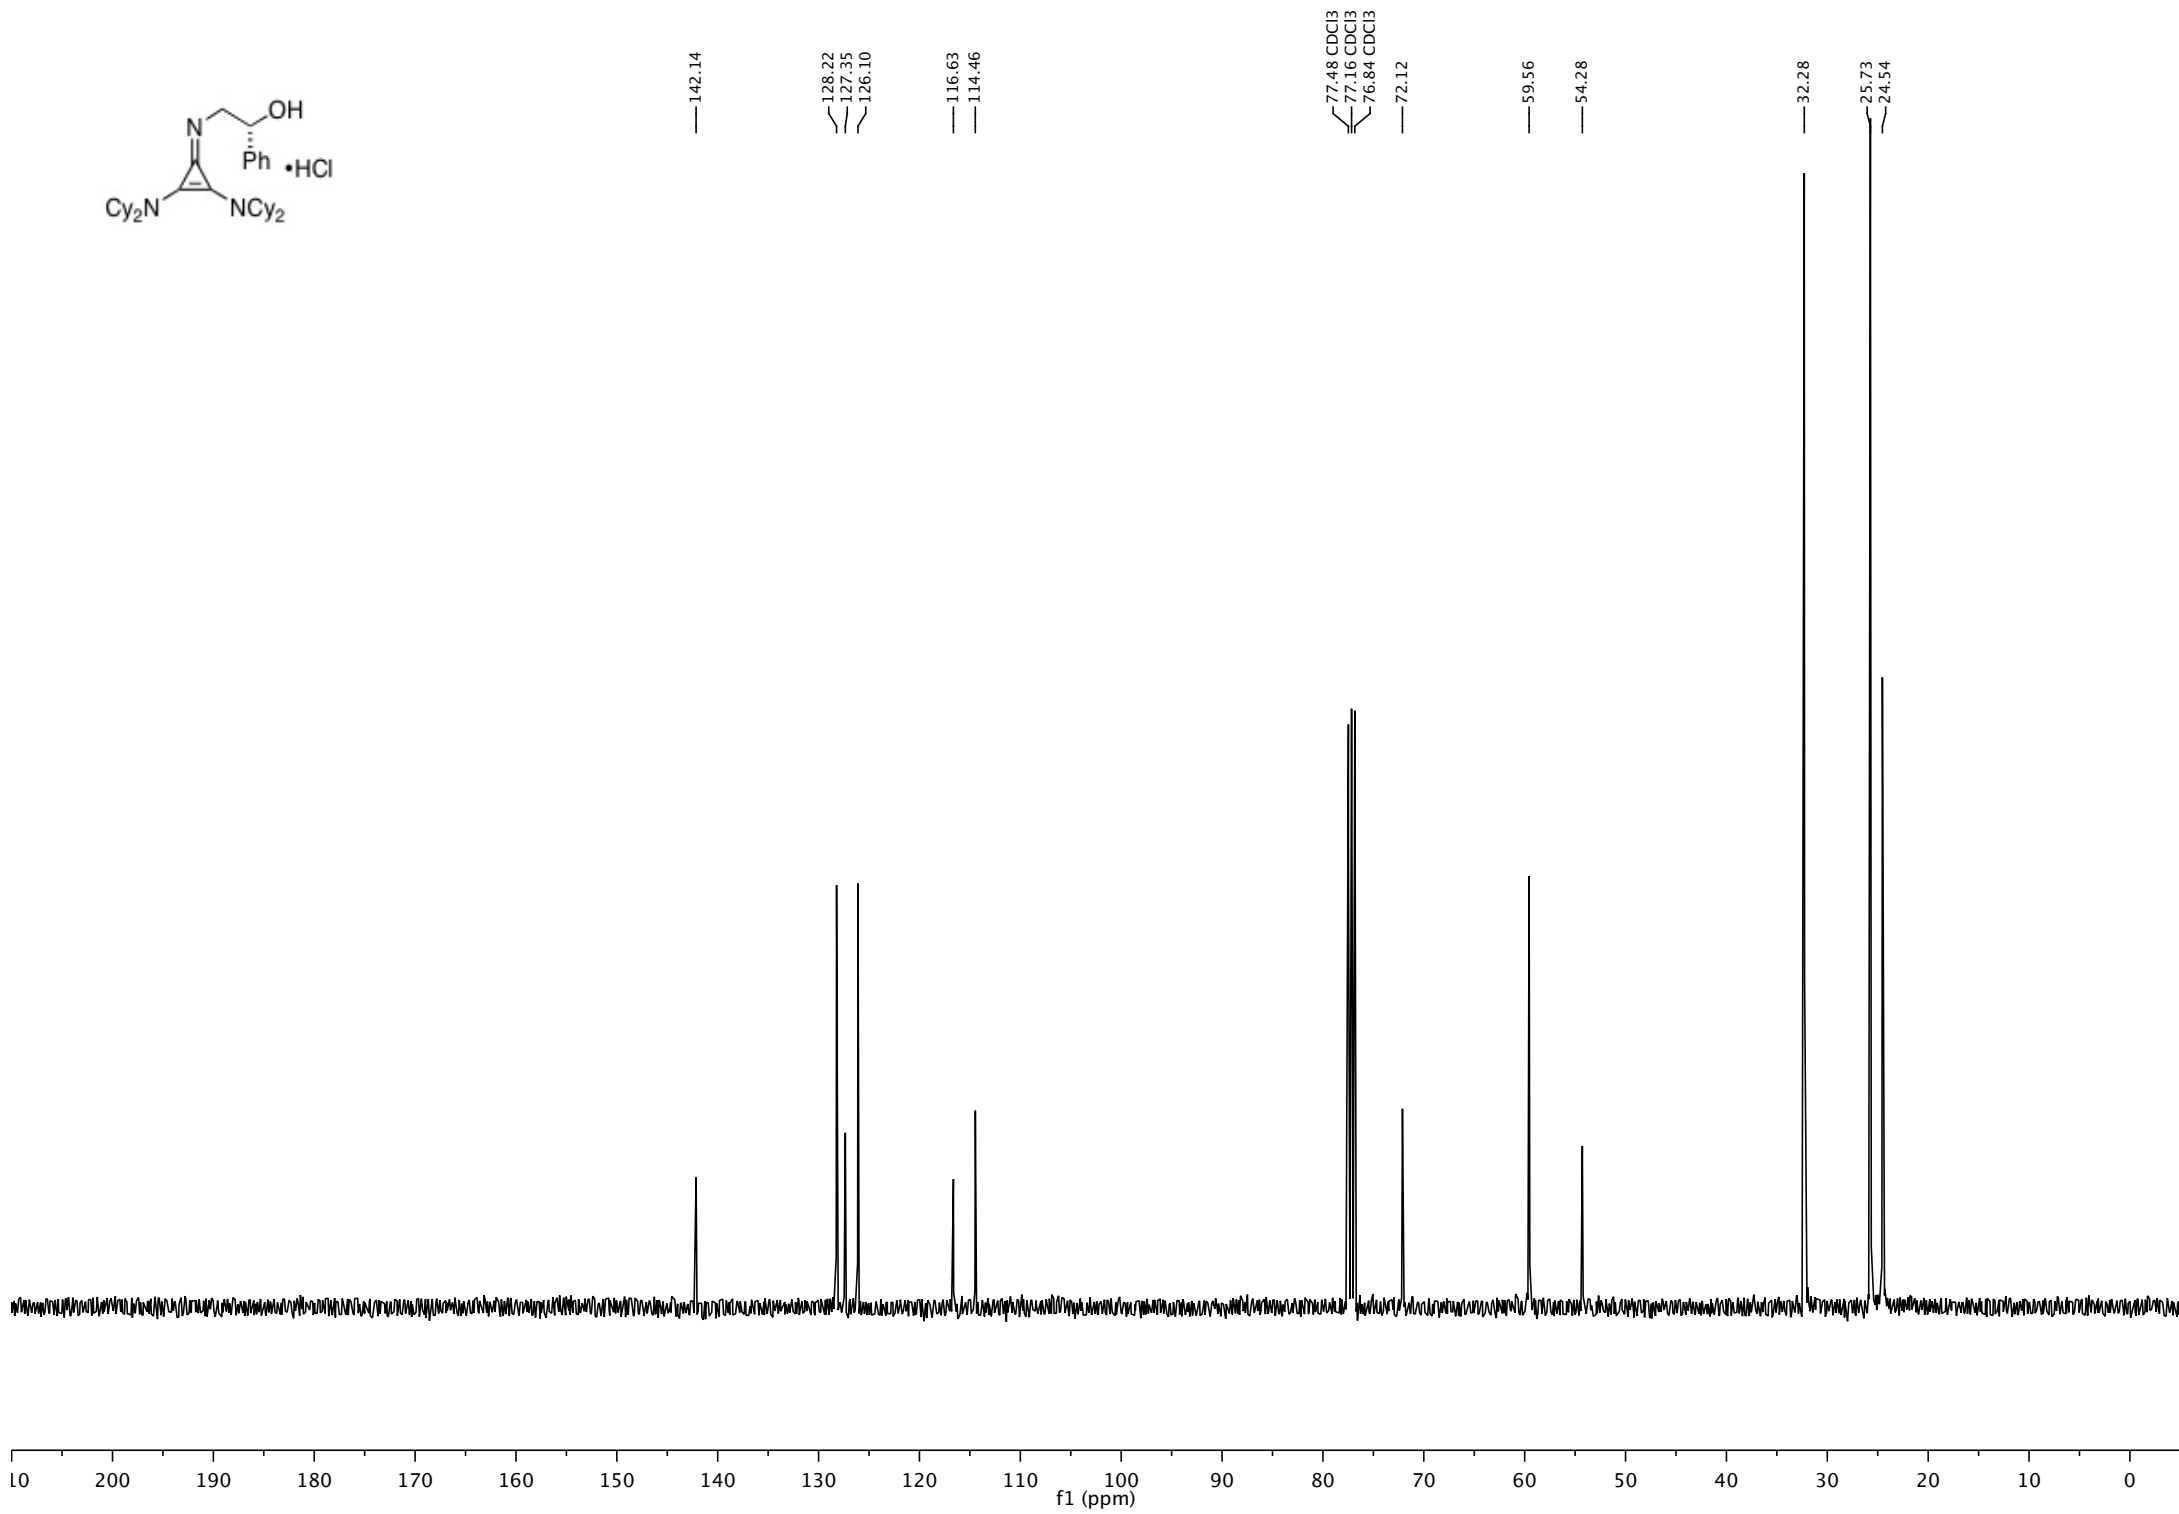

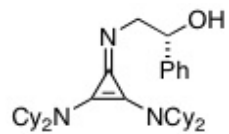

7.43  
7.43  
7.41  
7.32  
7.30  
7.28  
7.26  
7.23  
7.21

4.73  
4.72  
4.70  
4.69

3.86  
3.85  
3.83  
3.82

3.37  
3.35  
3.34  
3.32  
3.13  
3.11

1.84  
1.81  
1.71  
1.70  
1.69  
1.63  
1.28  
1.27  
1.24

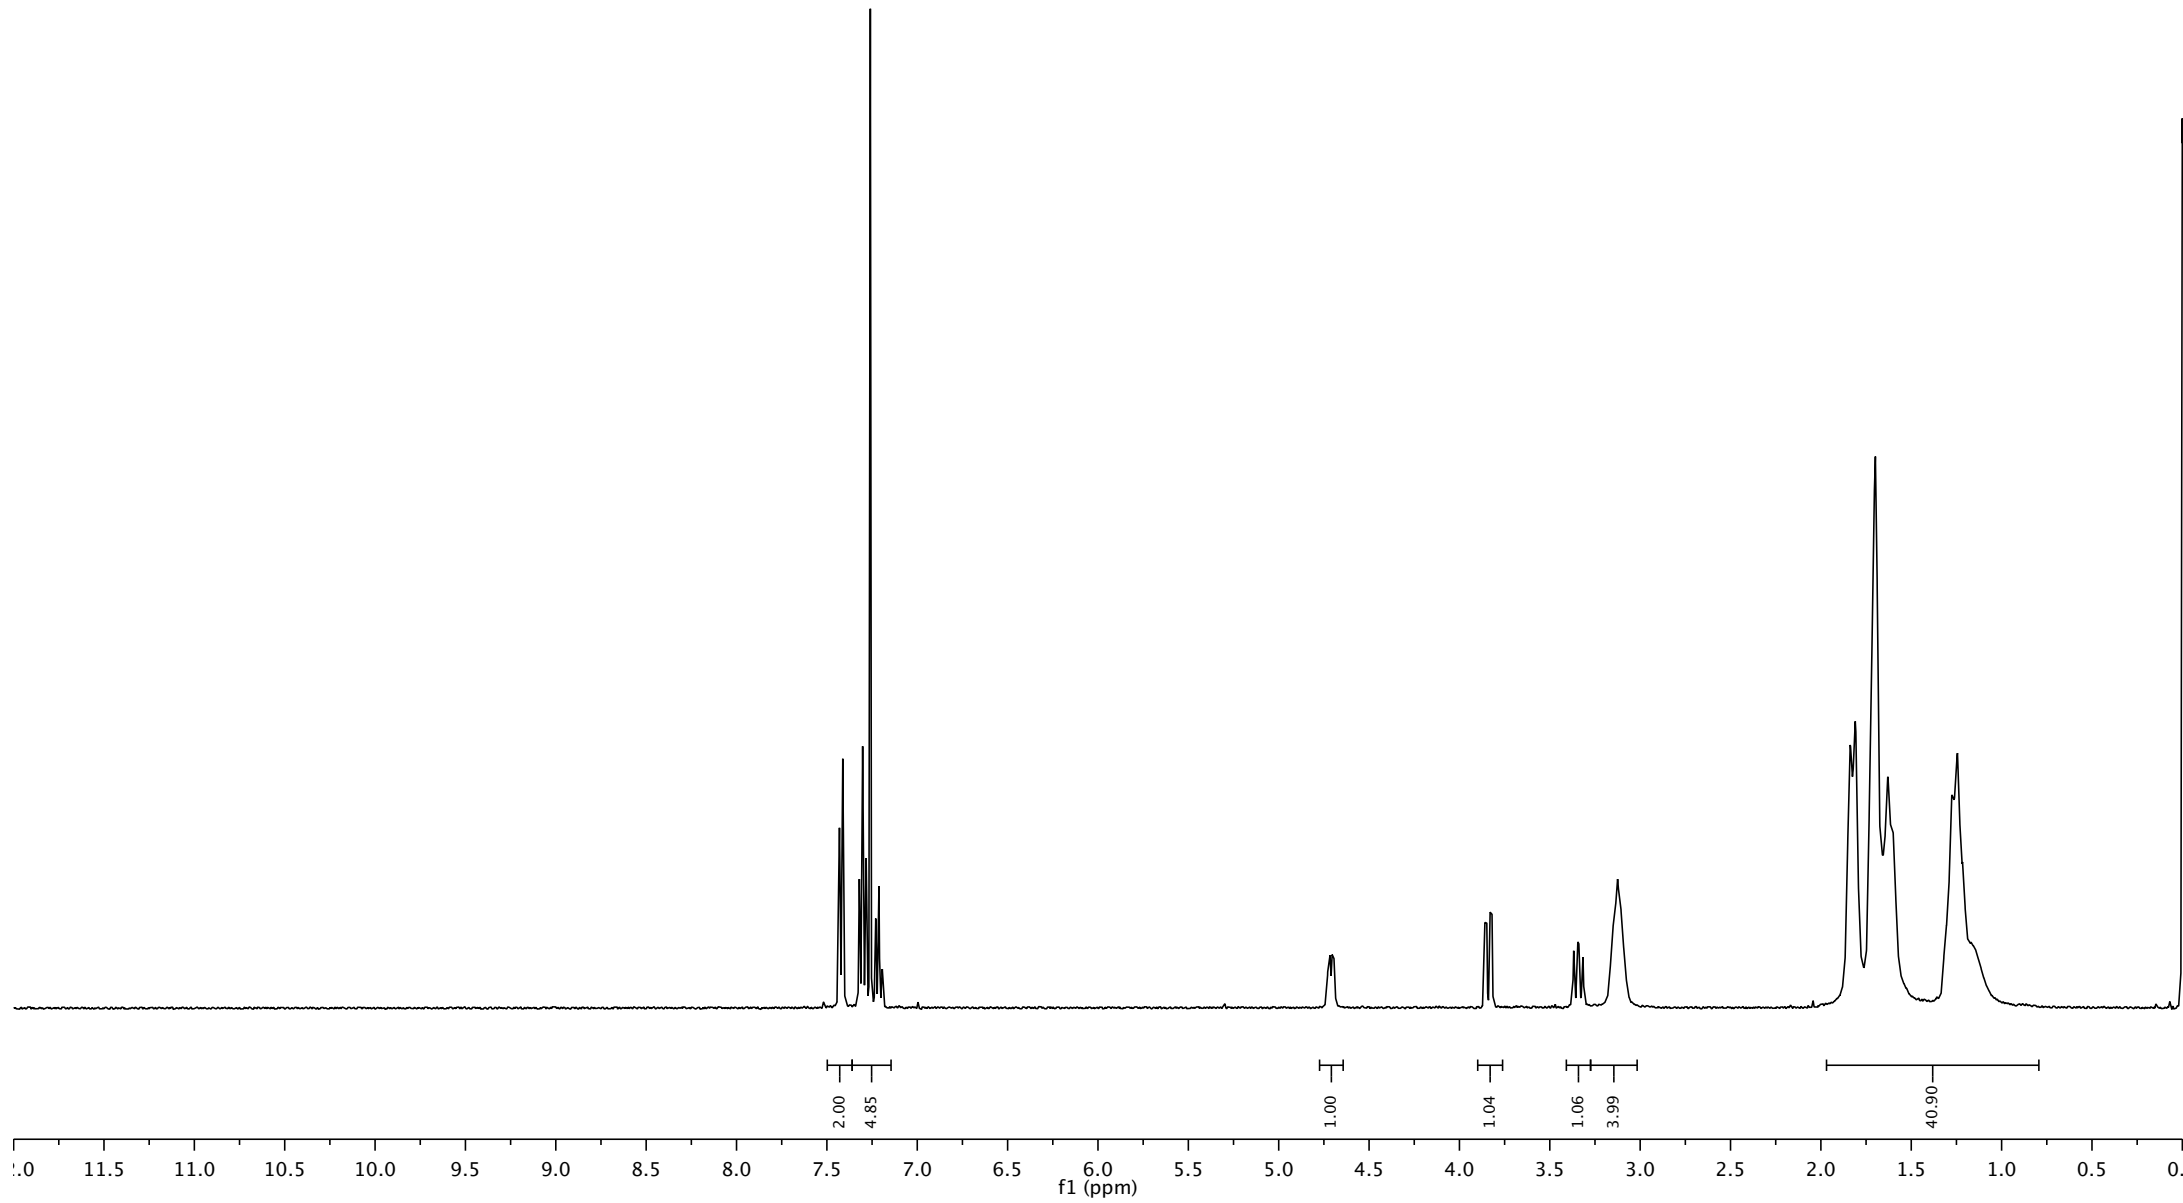

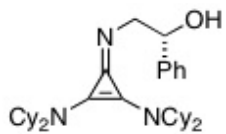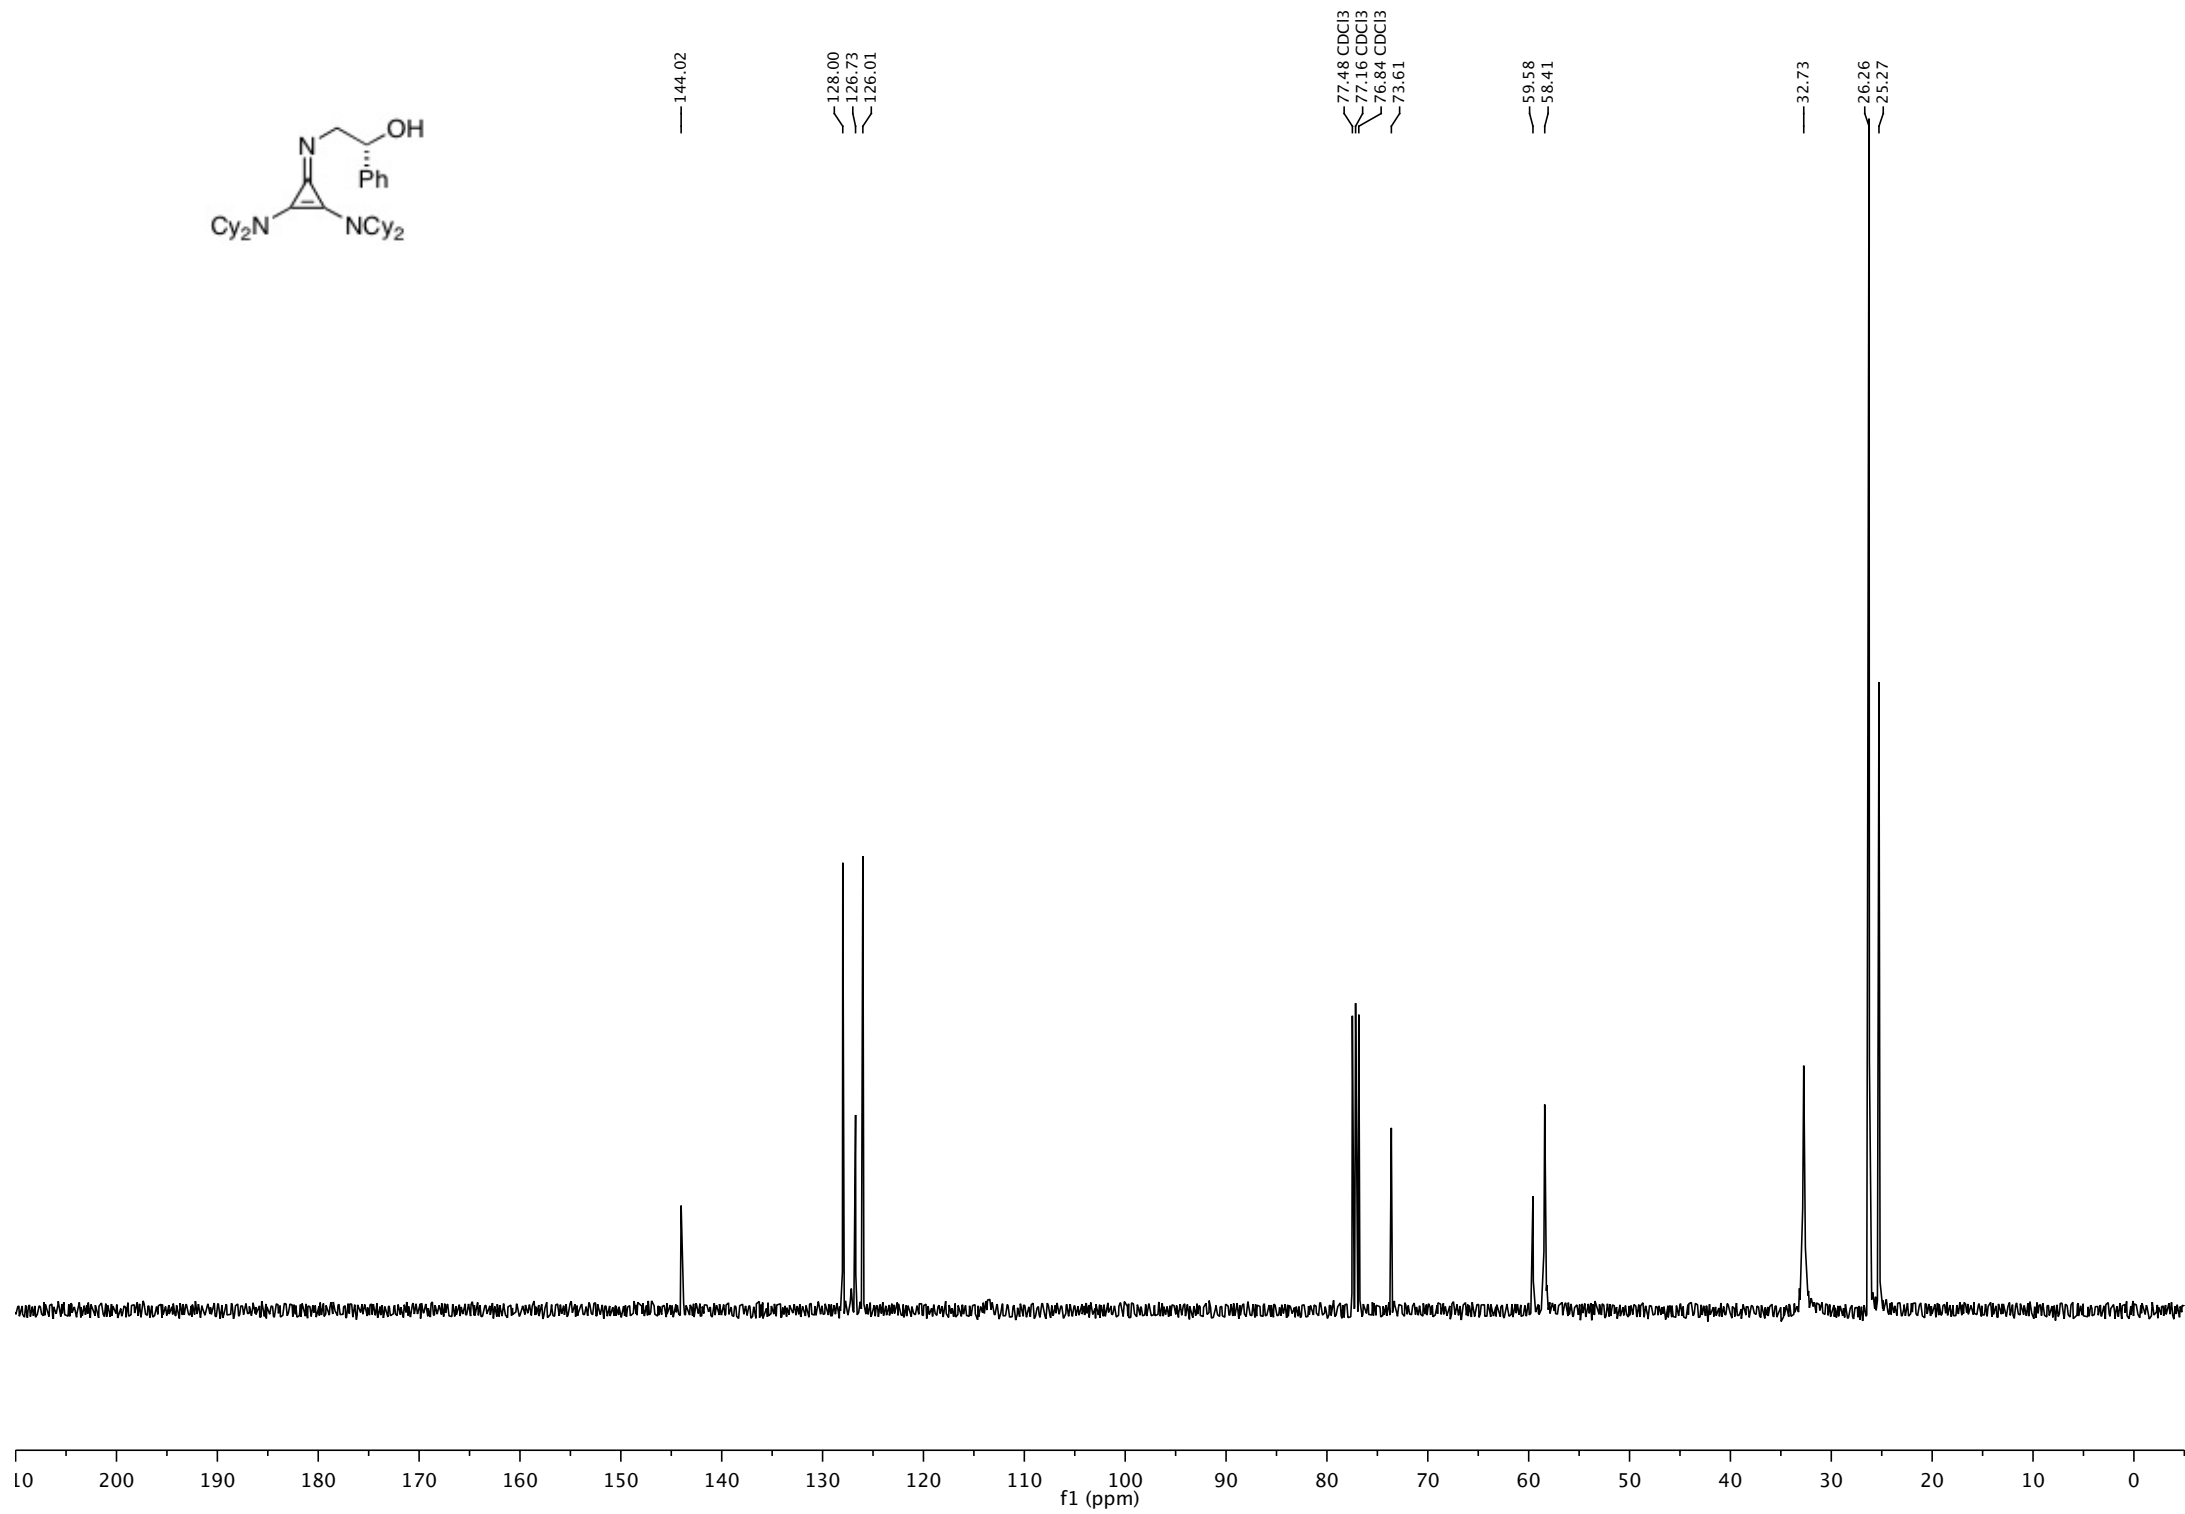

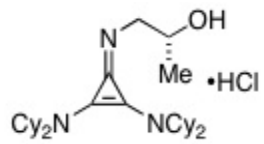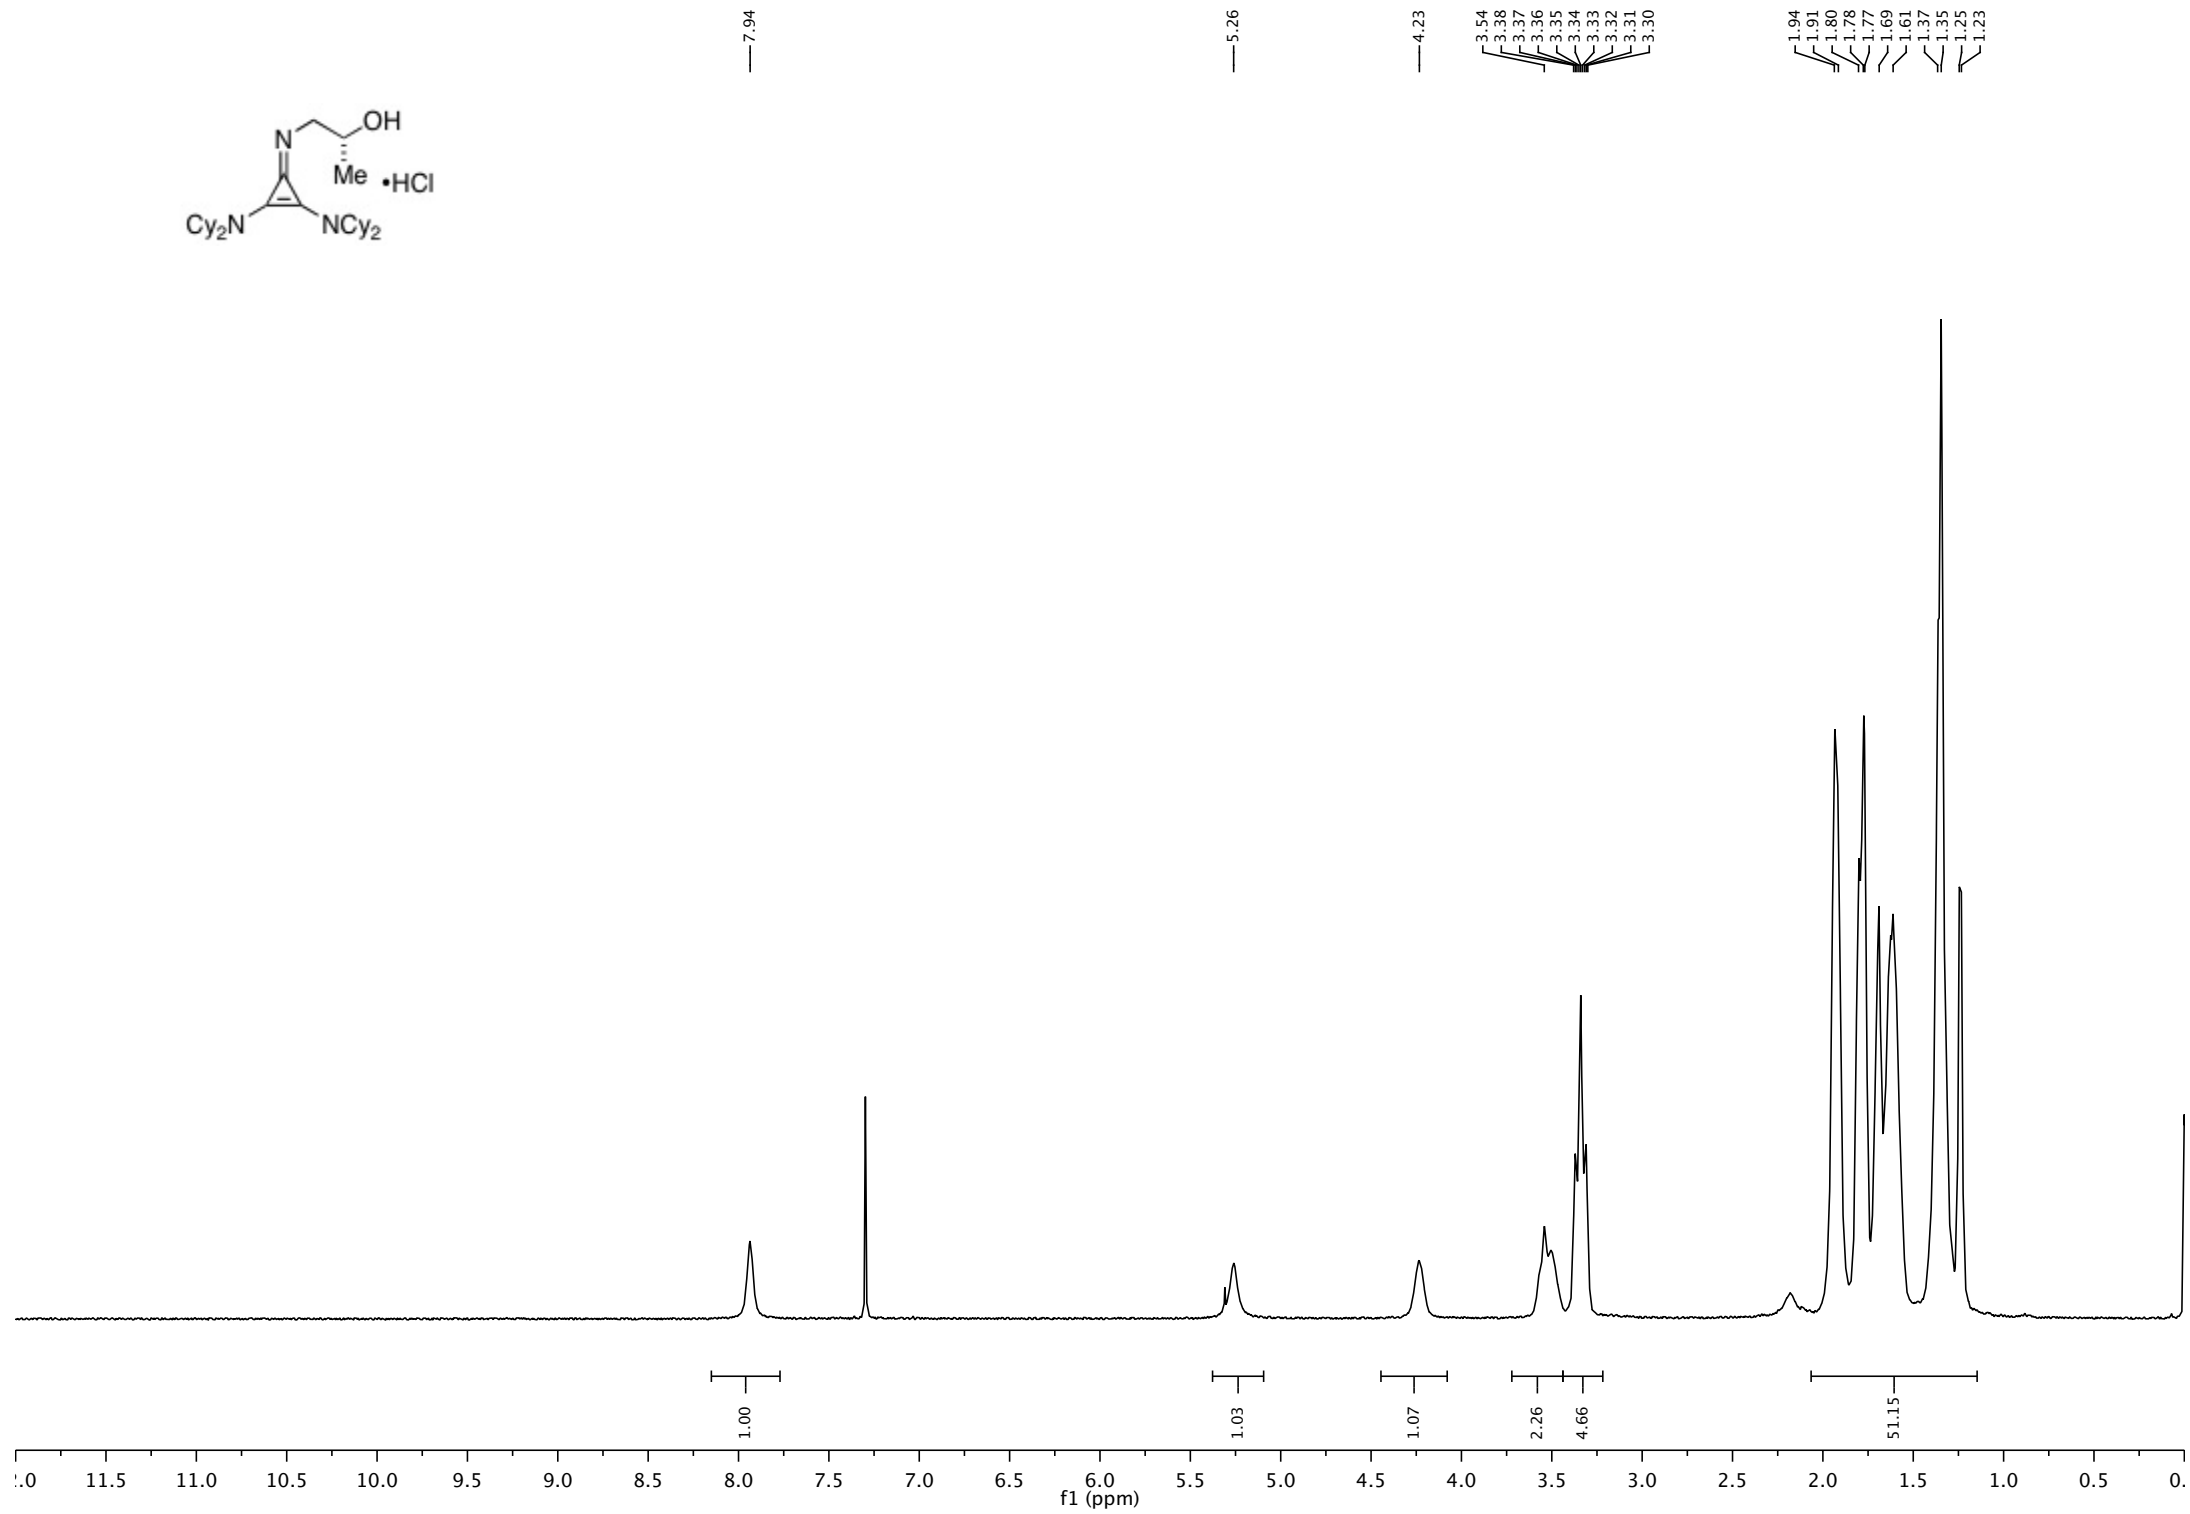

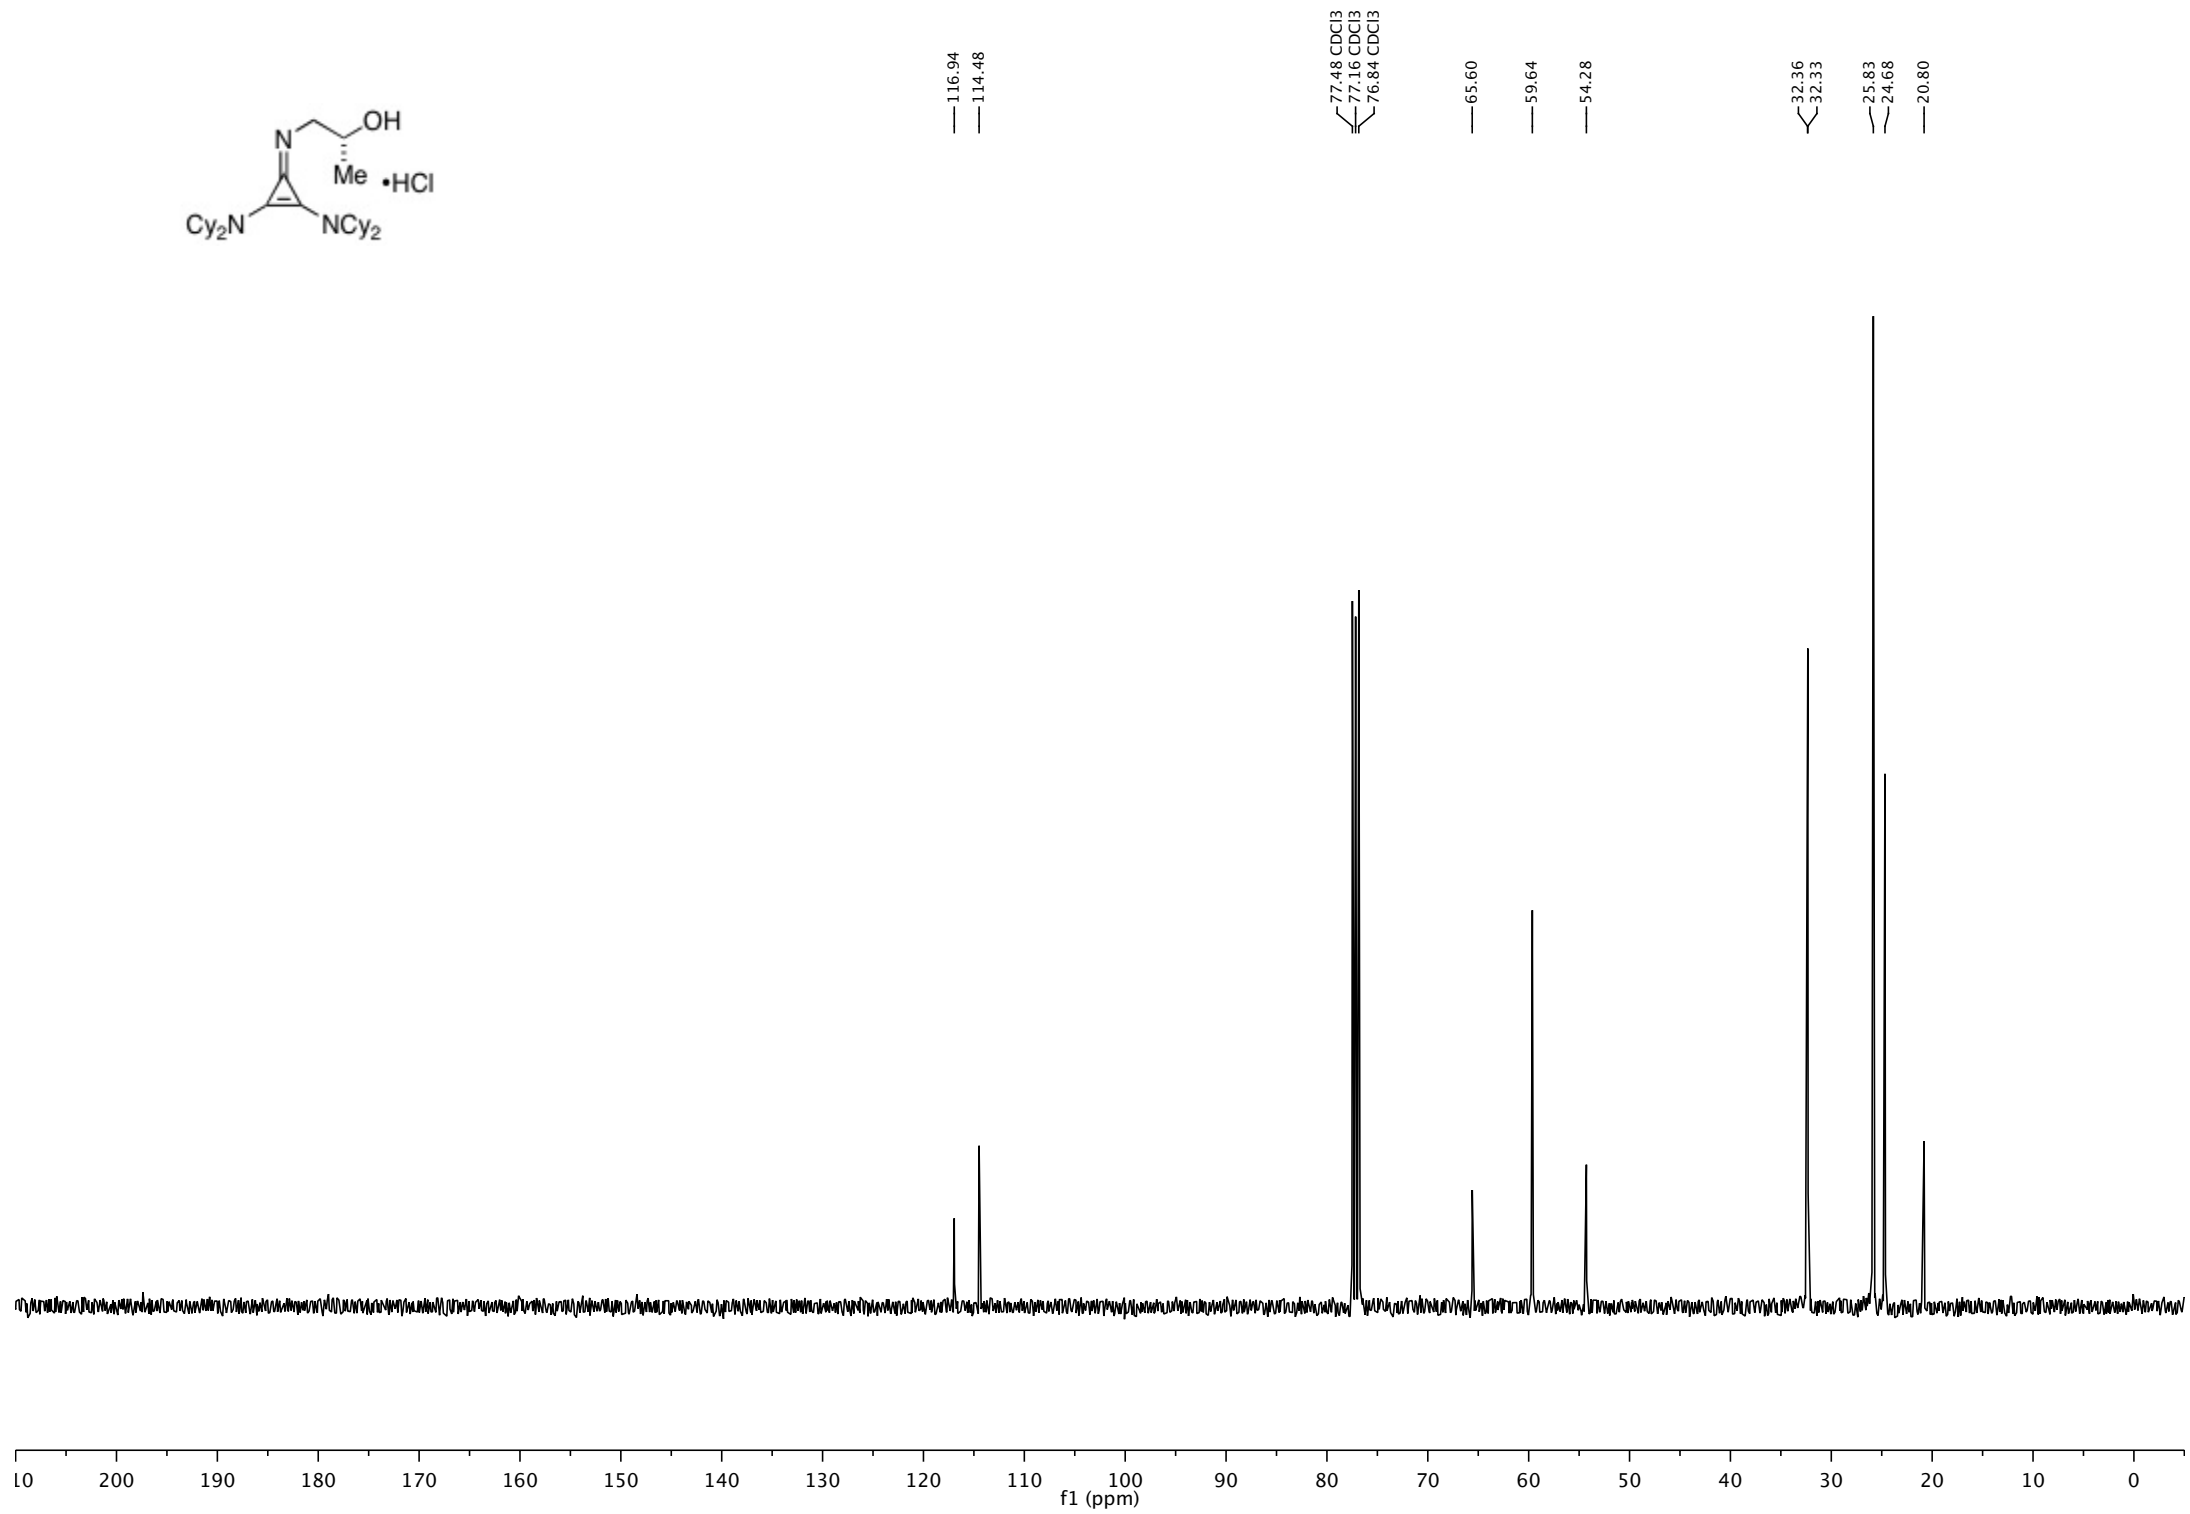

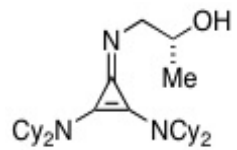

3.80  
3.80  
3.79  
3.78  
3.78  
3.61  
3.60  
3.58  
3.57  
3.14  
3.13

1.86  
1.82  
1.72  
1.71  
1.70  
1.69  
1.66  
1.66  
1.18  
1.17

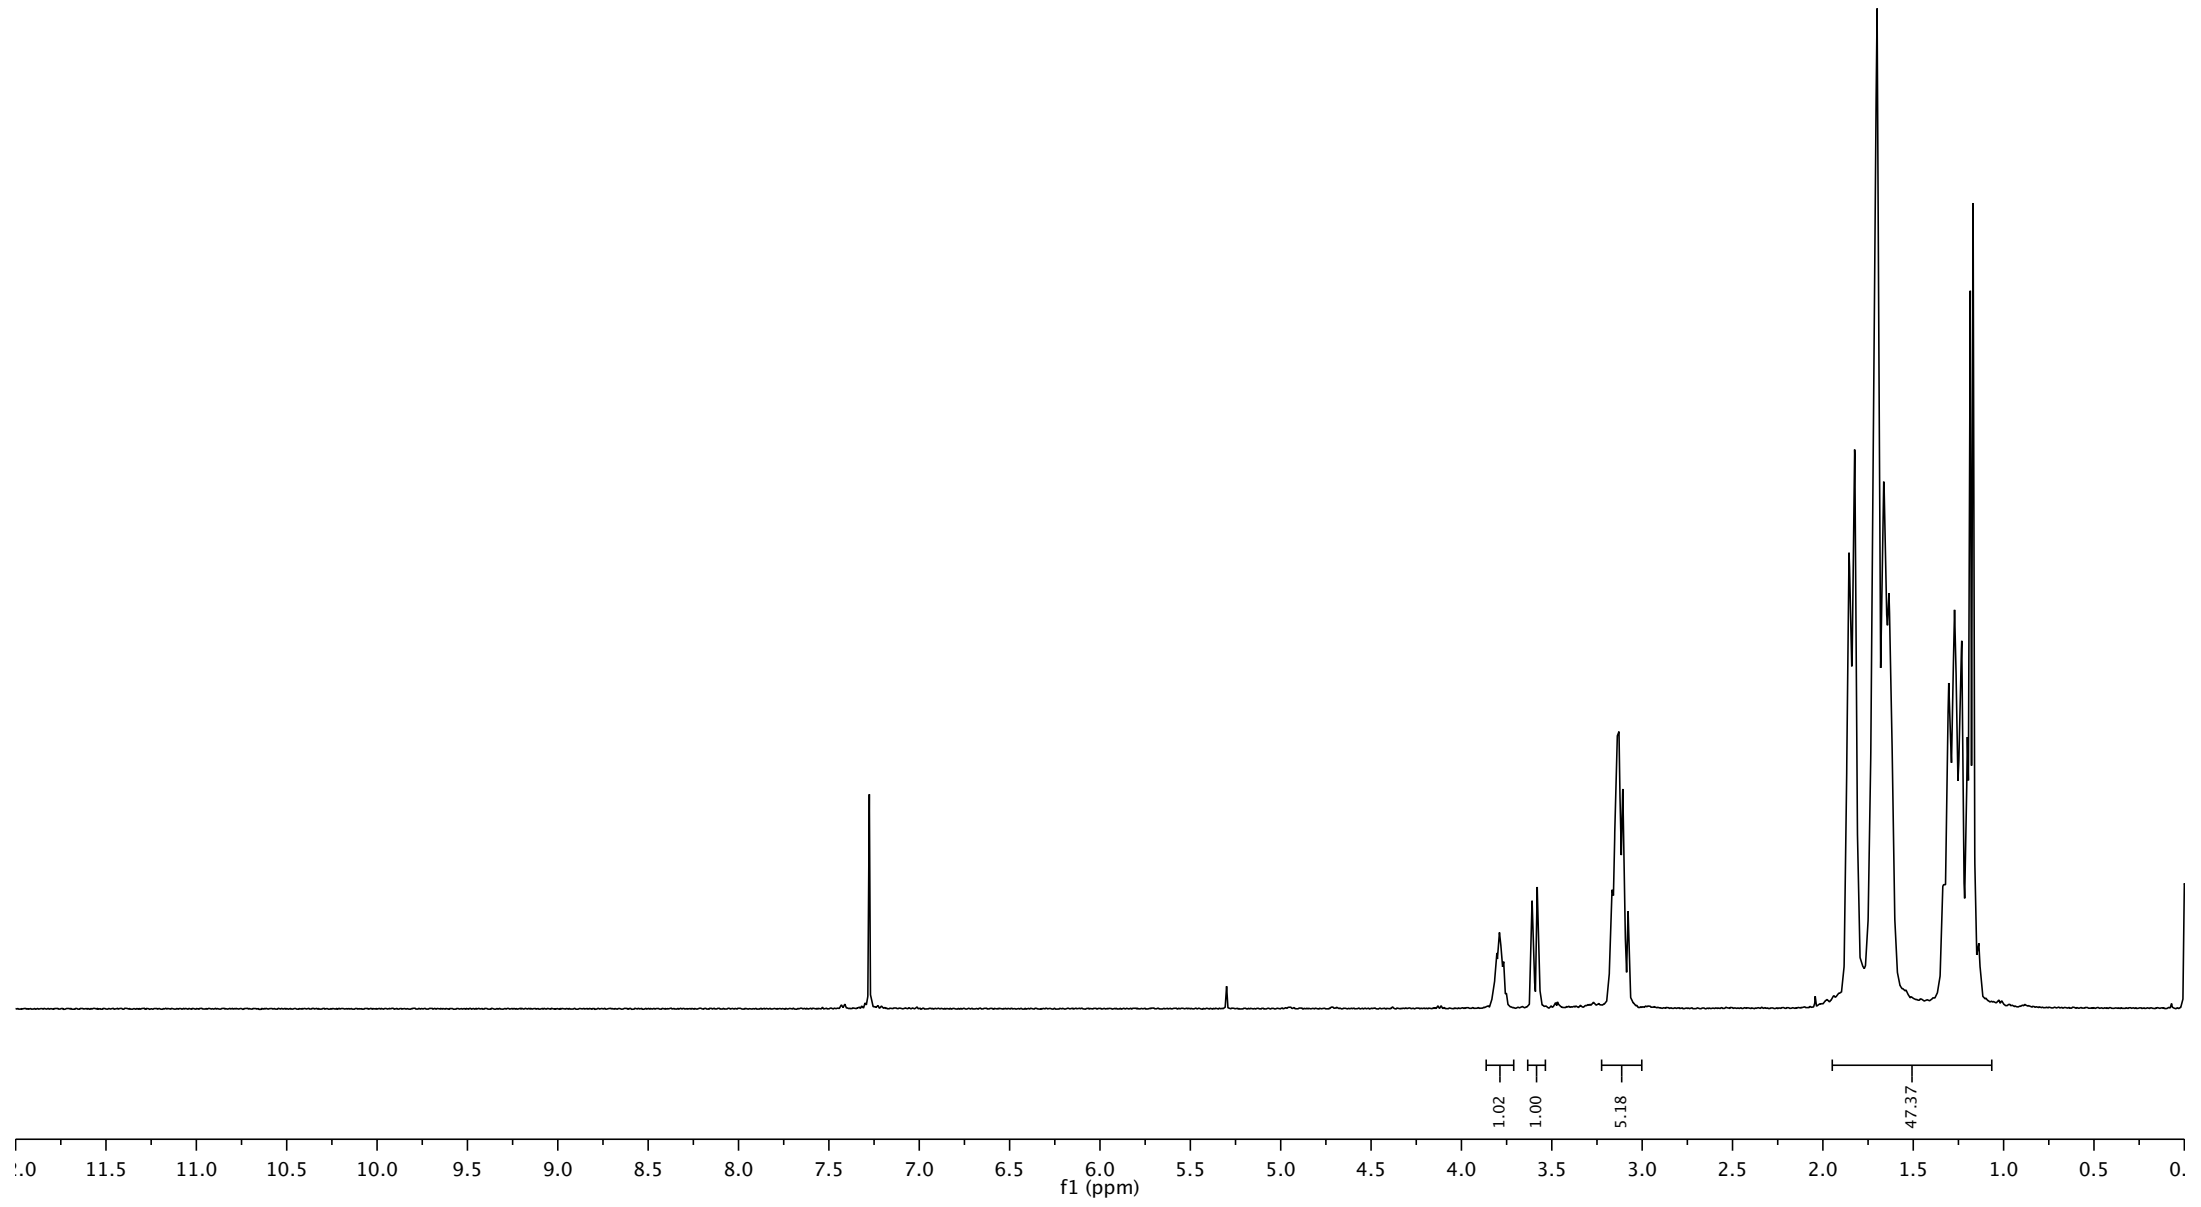

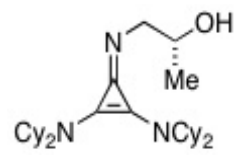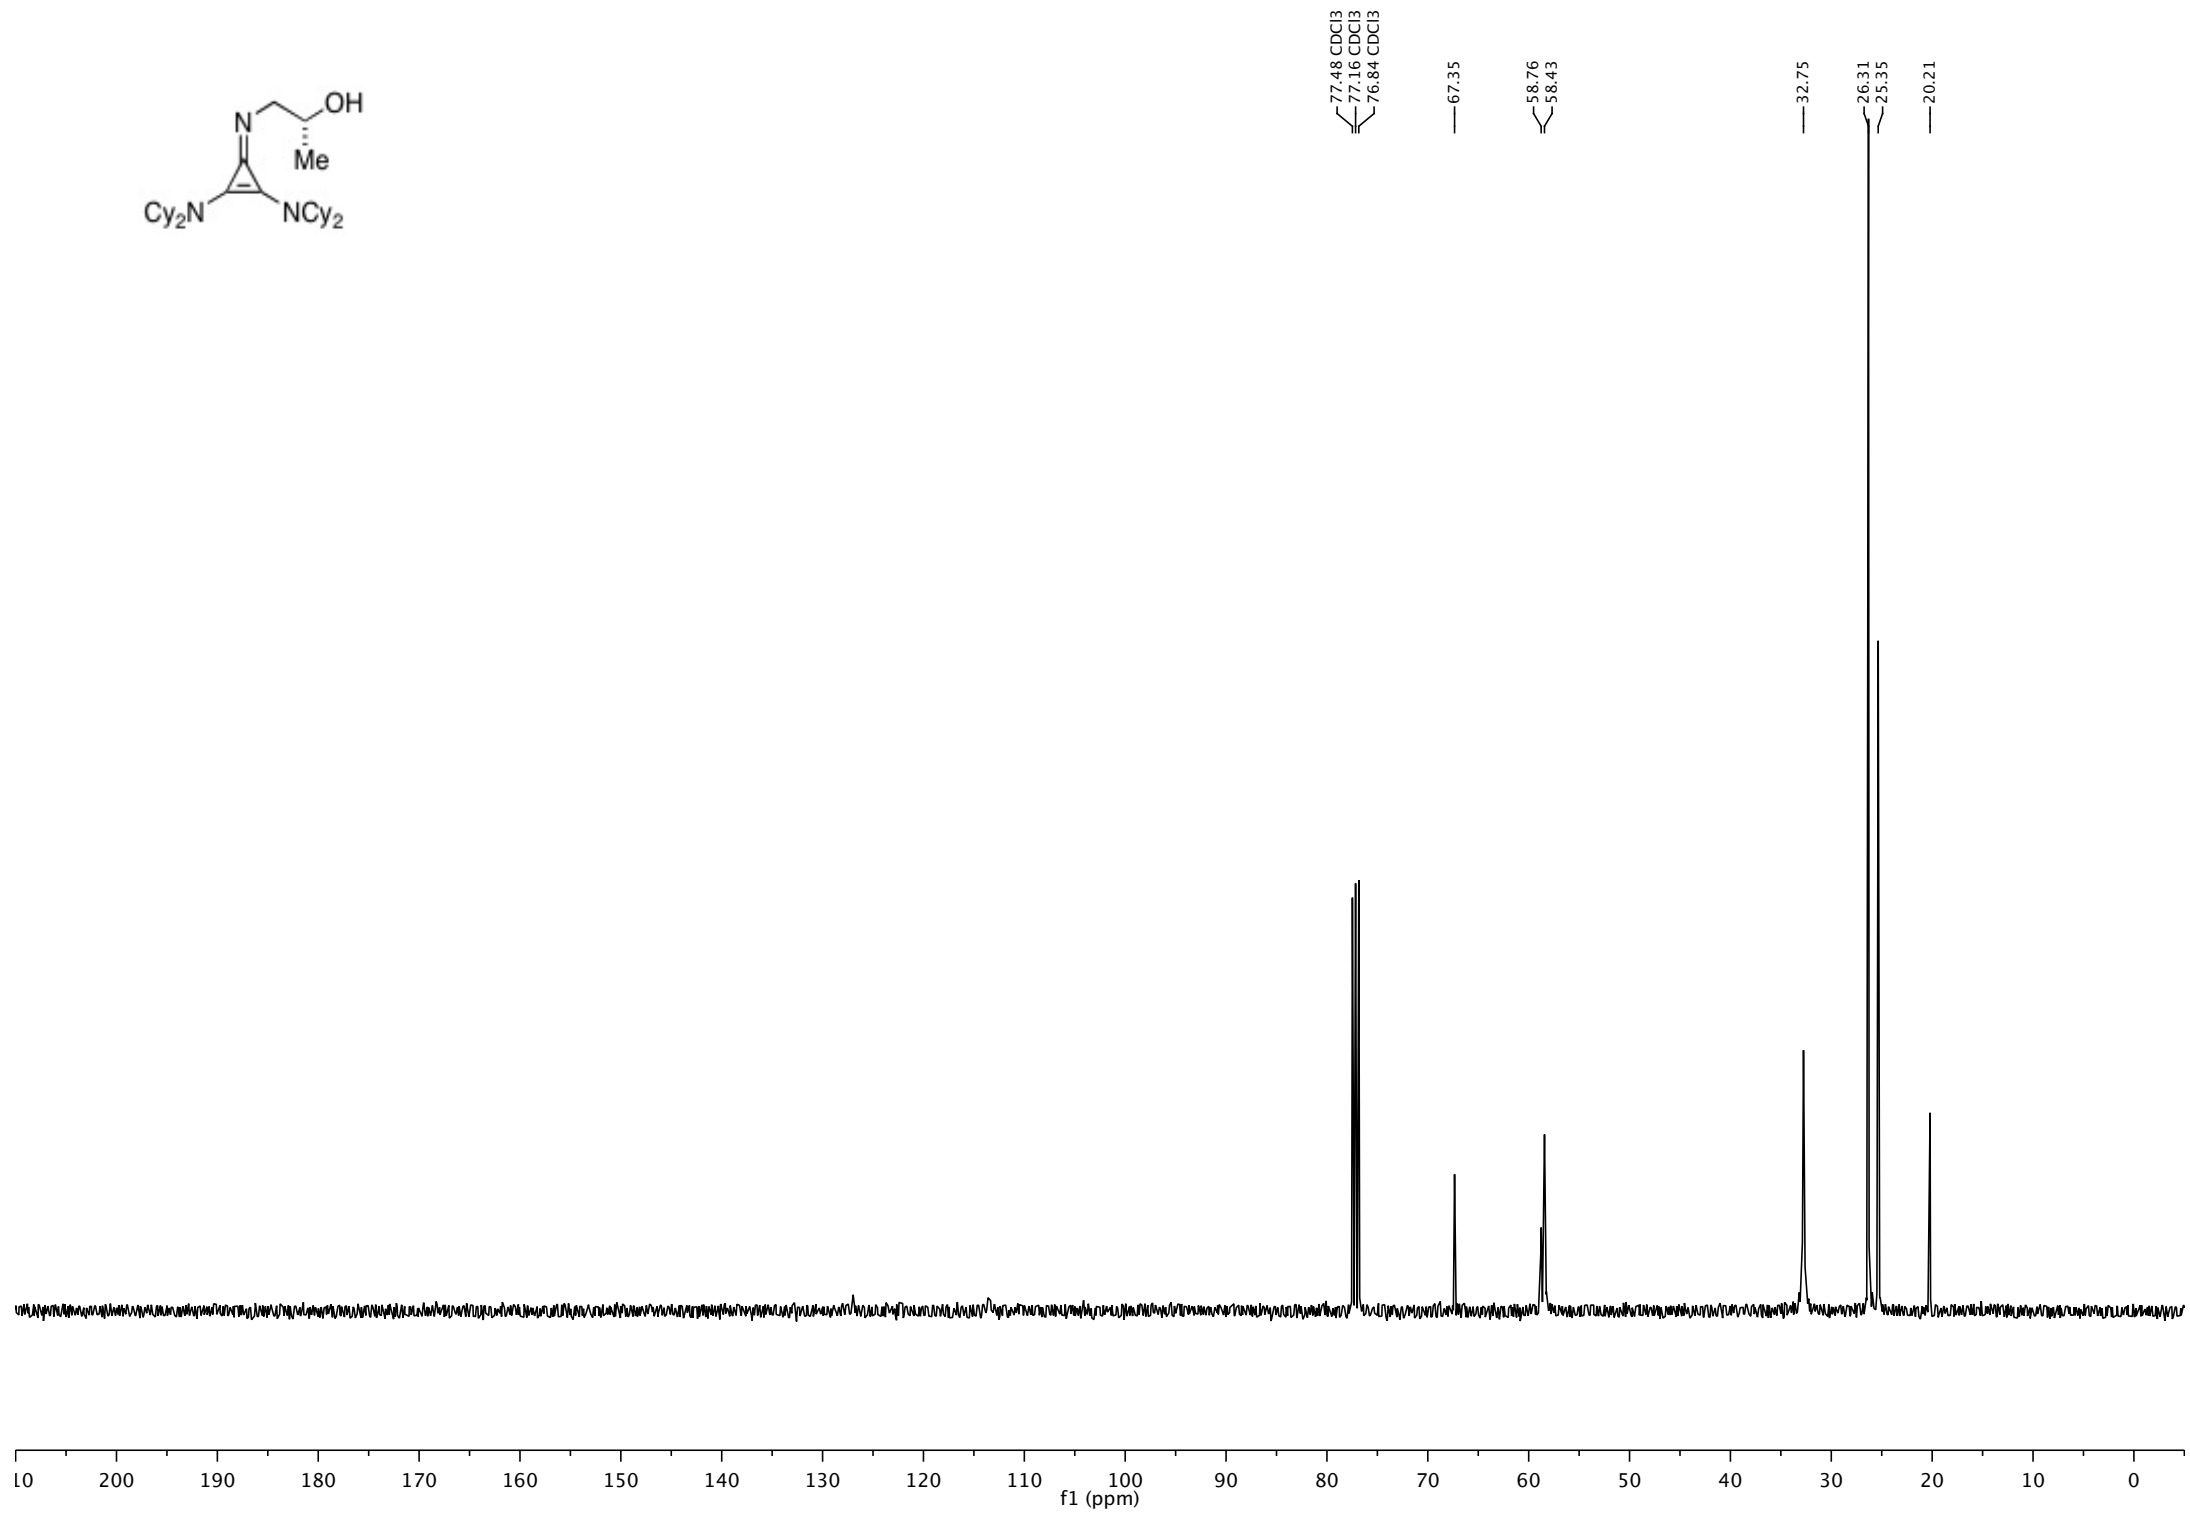



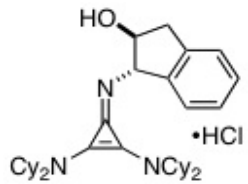

7.74  
7.72  
7.27  
7.22  
7.18  
6.99  
6.97

6.10

5.02  
5.00  
4.99  
4.92  
4.91

3.42  
3.40  
3.39  
3.38  
3.36  
3.22  
3.21  
3.19  
3.17  
3.00  
2.98  
2.96  
2.94

1.85  
1.84  
1.81  
1.65  
1.64  
1.62  
1.27  
1.26  
1.24

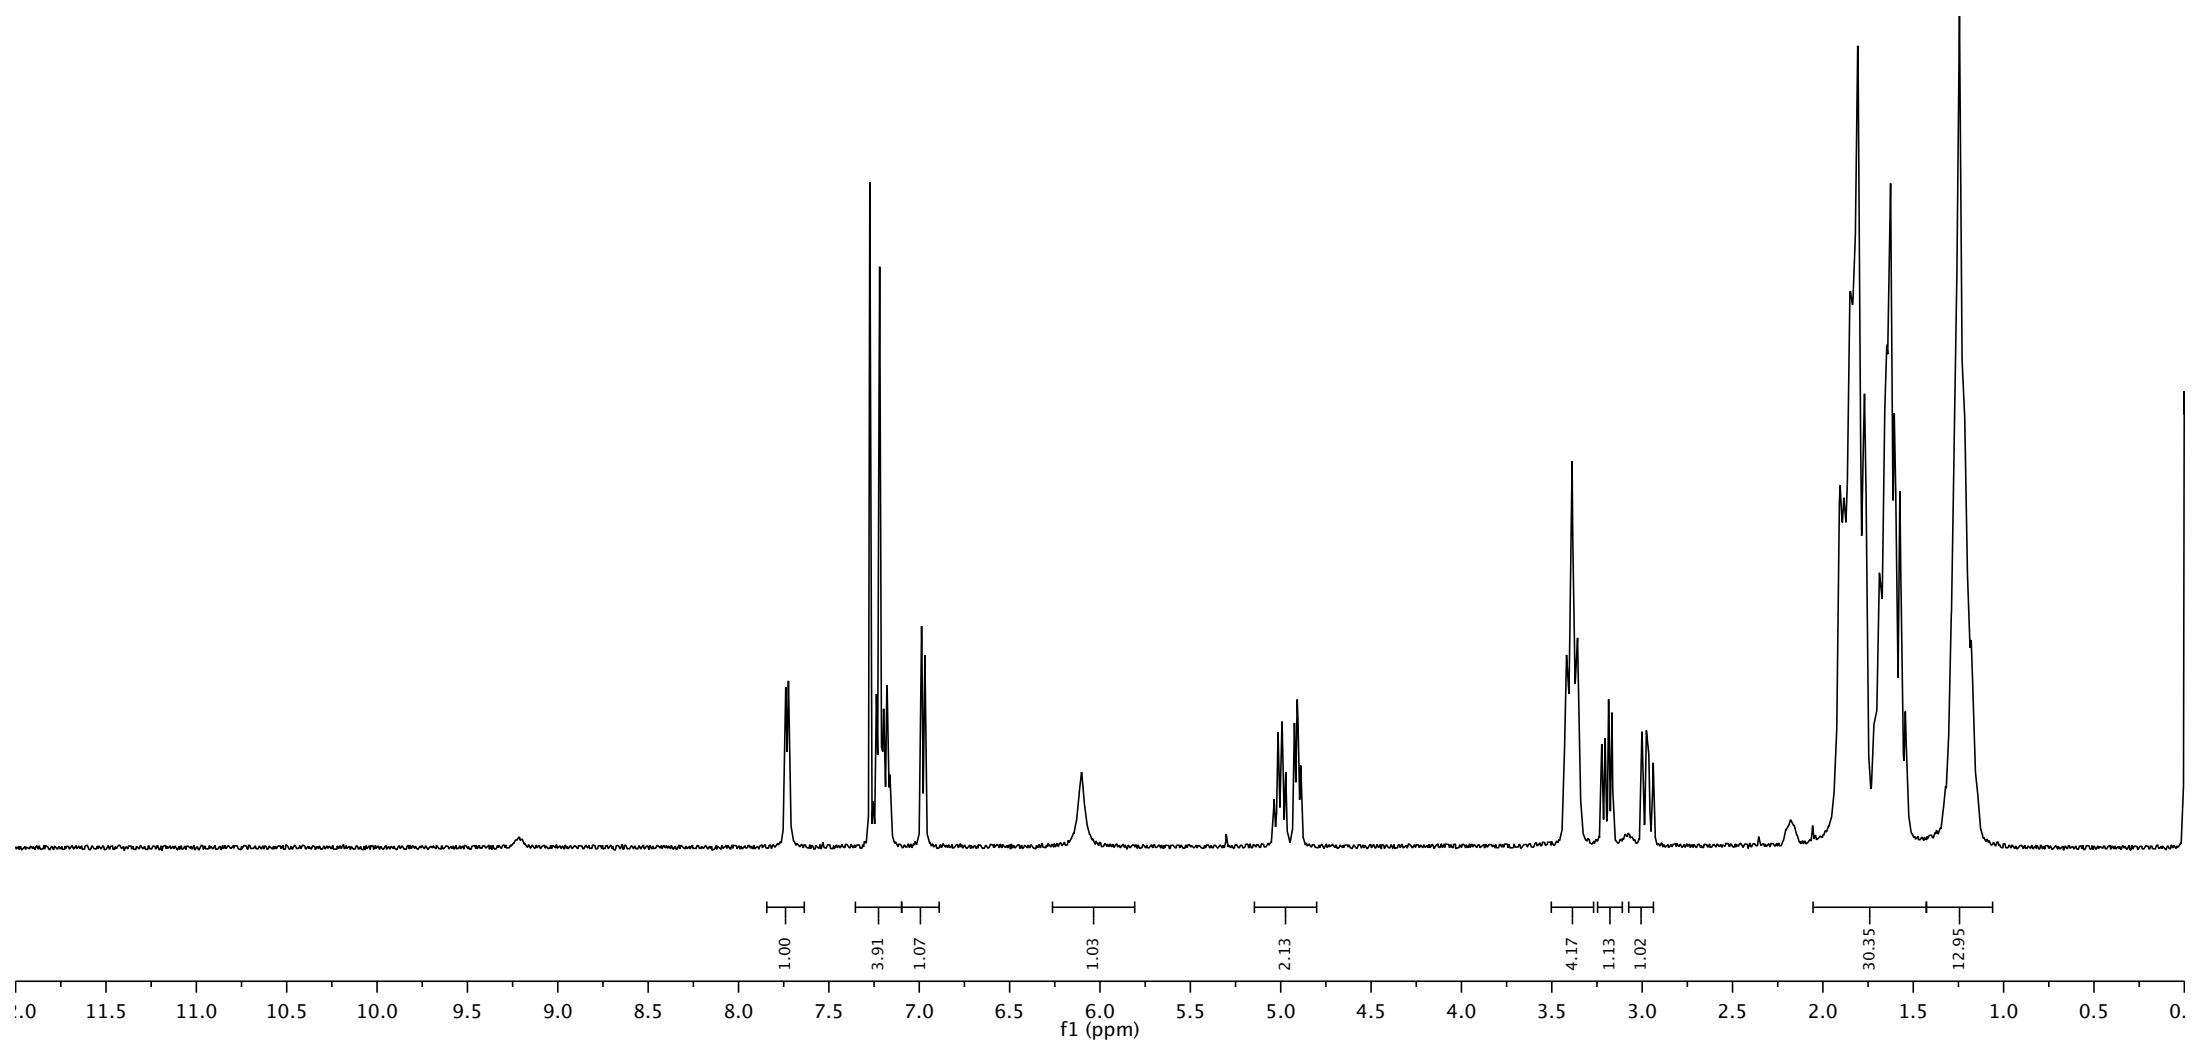



140.57  
139.20

128.34  
126.79  
125.30  
122.39

116.56  
115.10

77.92  
77.42 CDCl<sub>3</sub>  
77.16 CDCl<sub>3</sub>  
76.91 CDCl<sub>3</sub>

68.50

59.45

37.09

32.39  
32.23

25.64  
25.48  
24.58

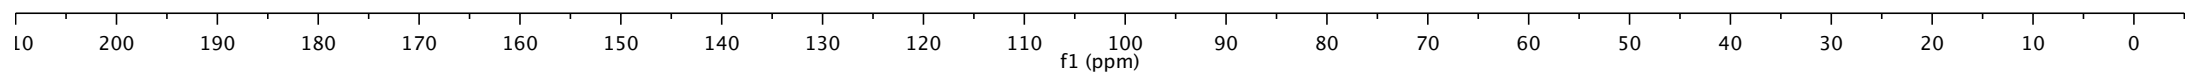

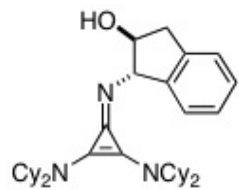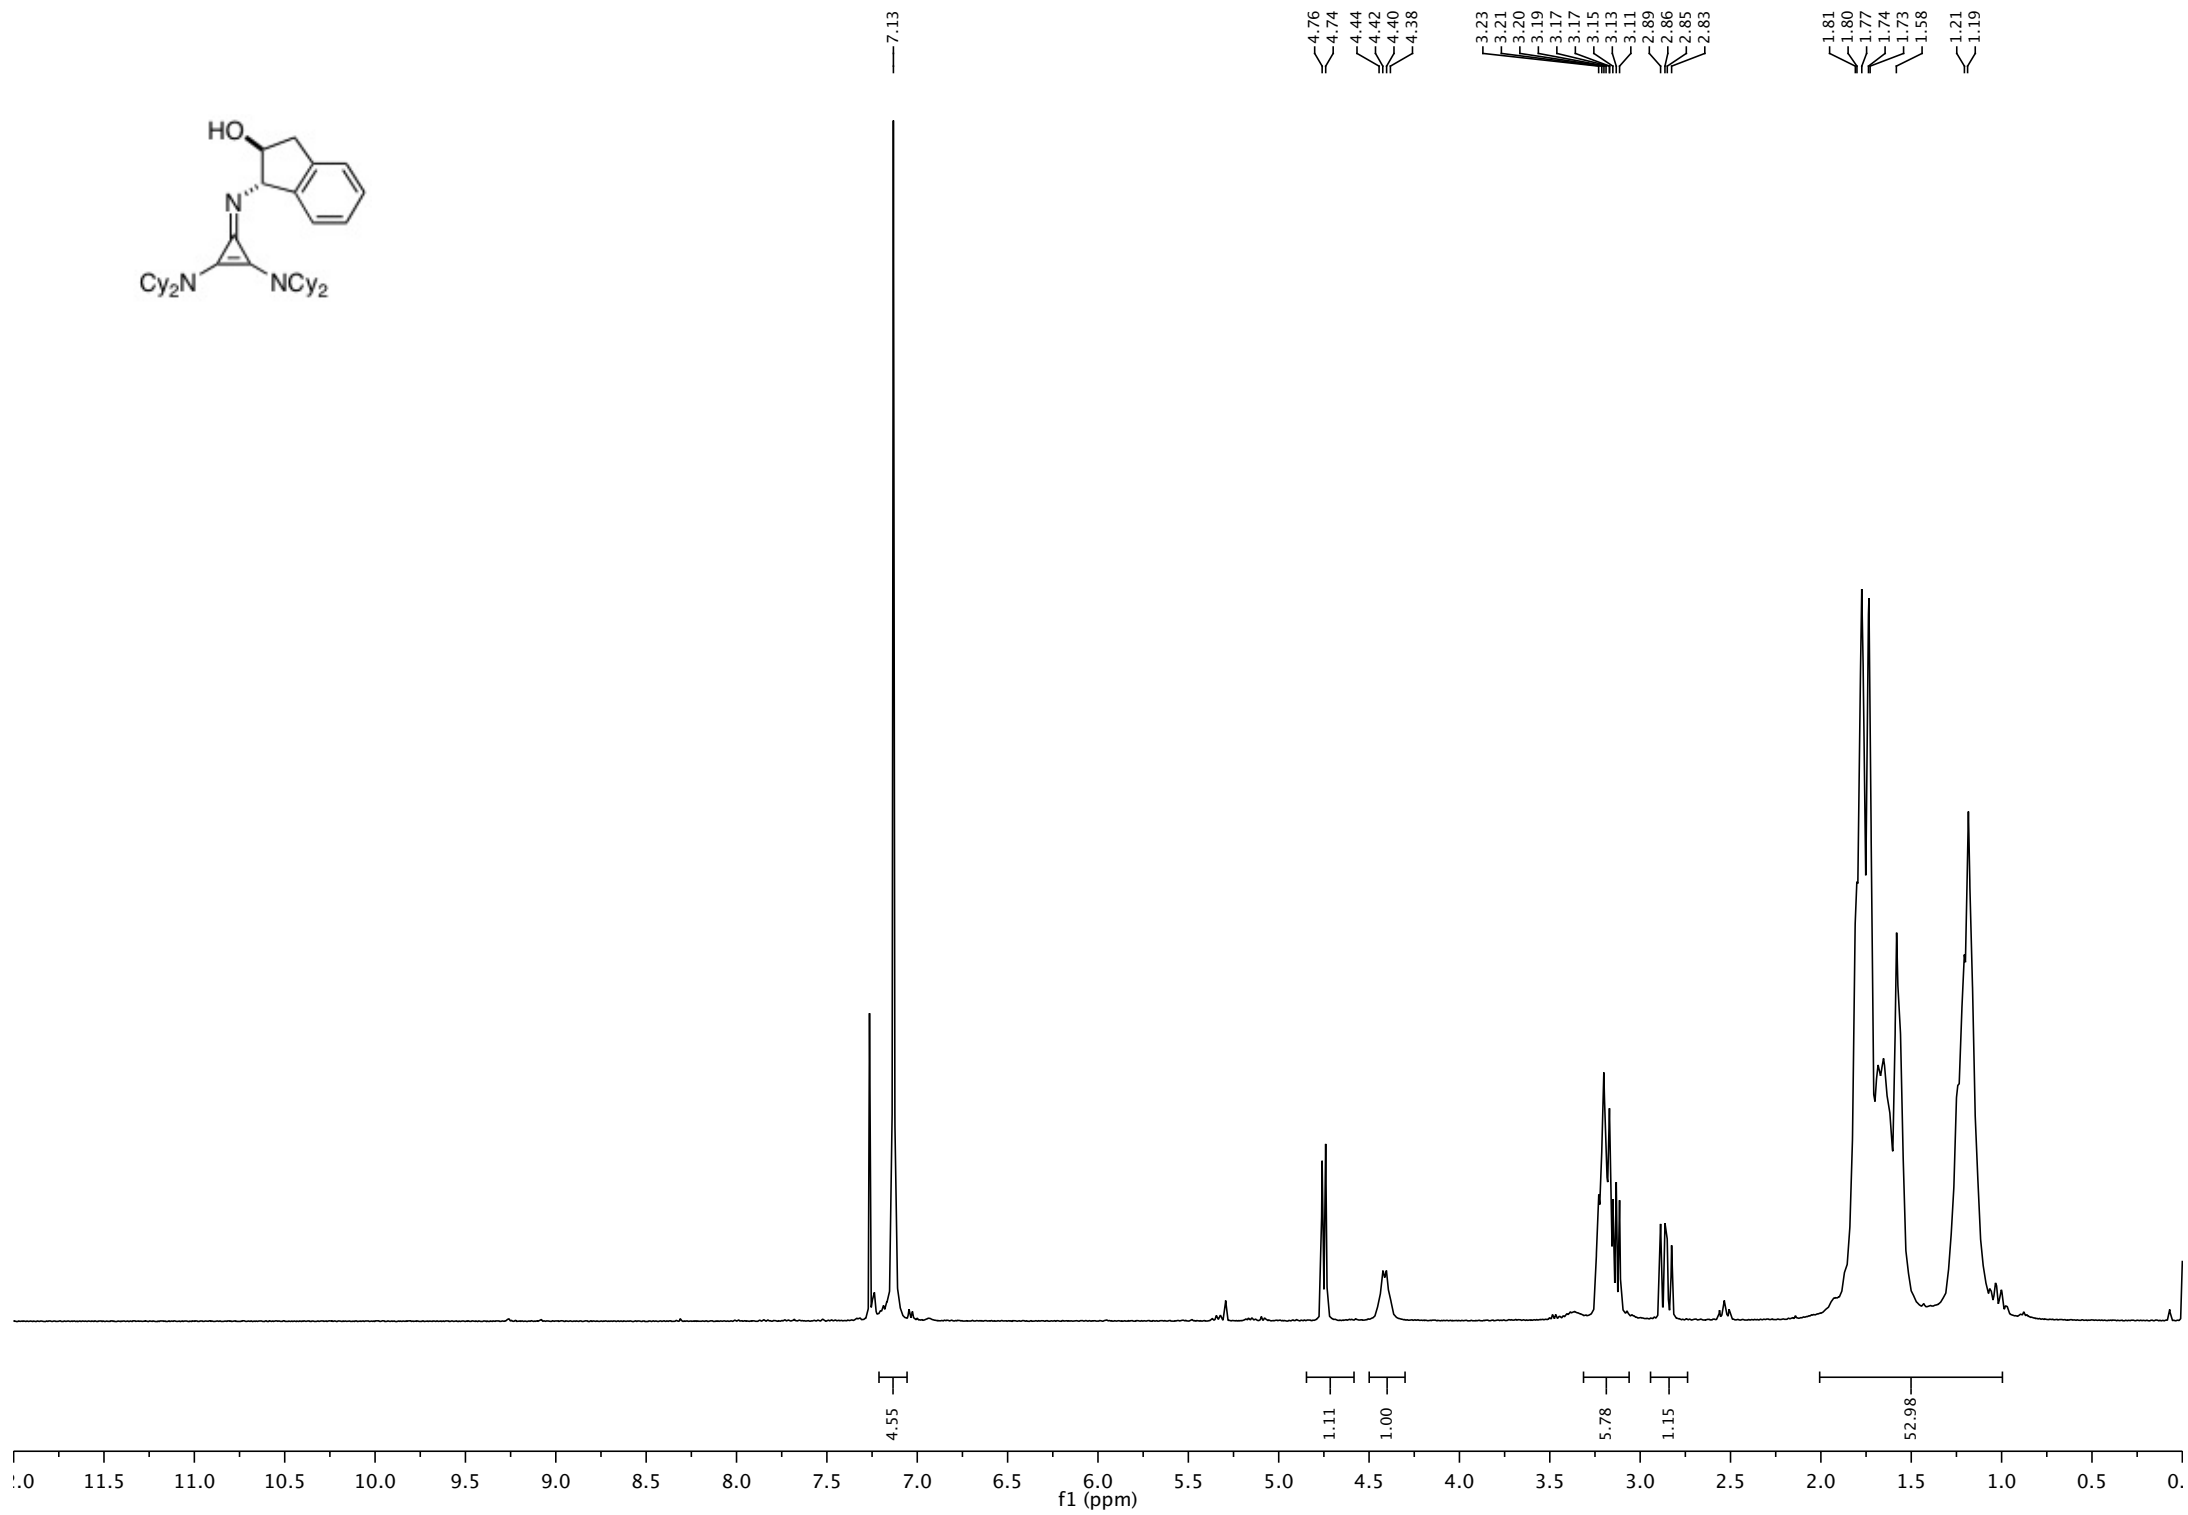

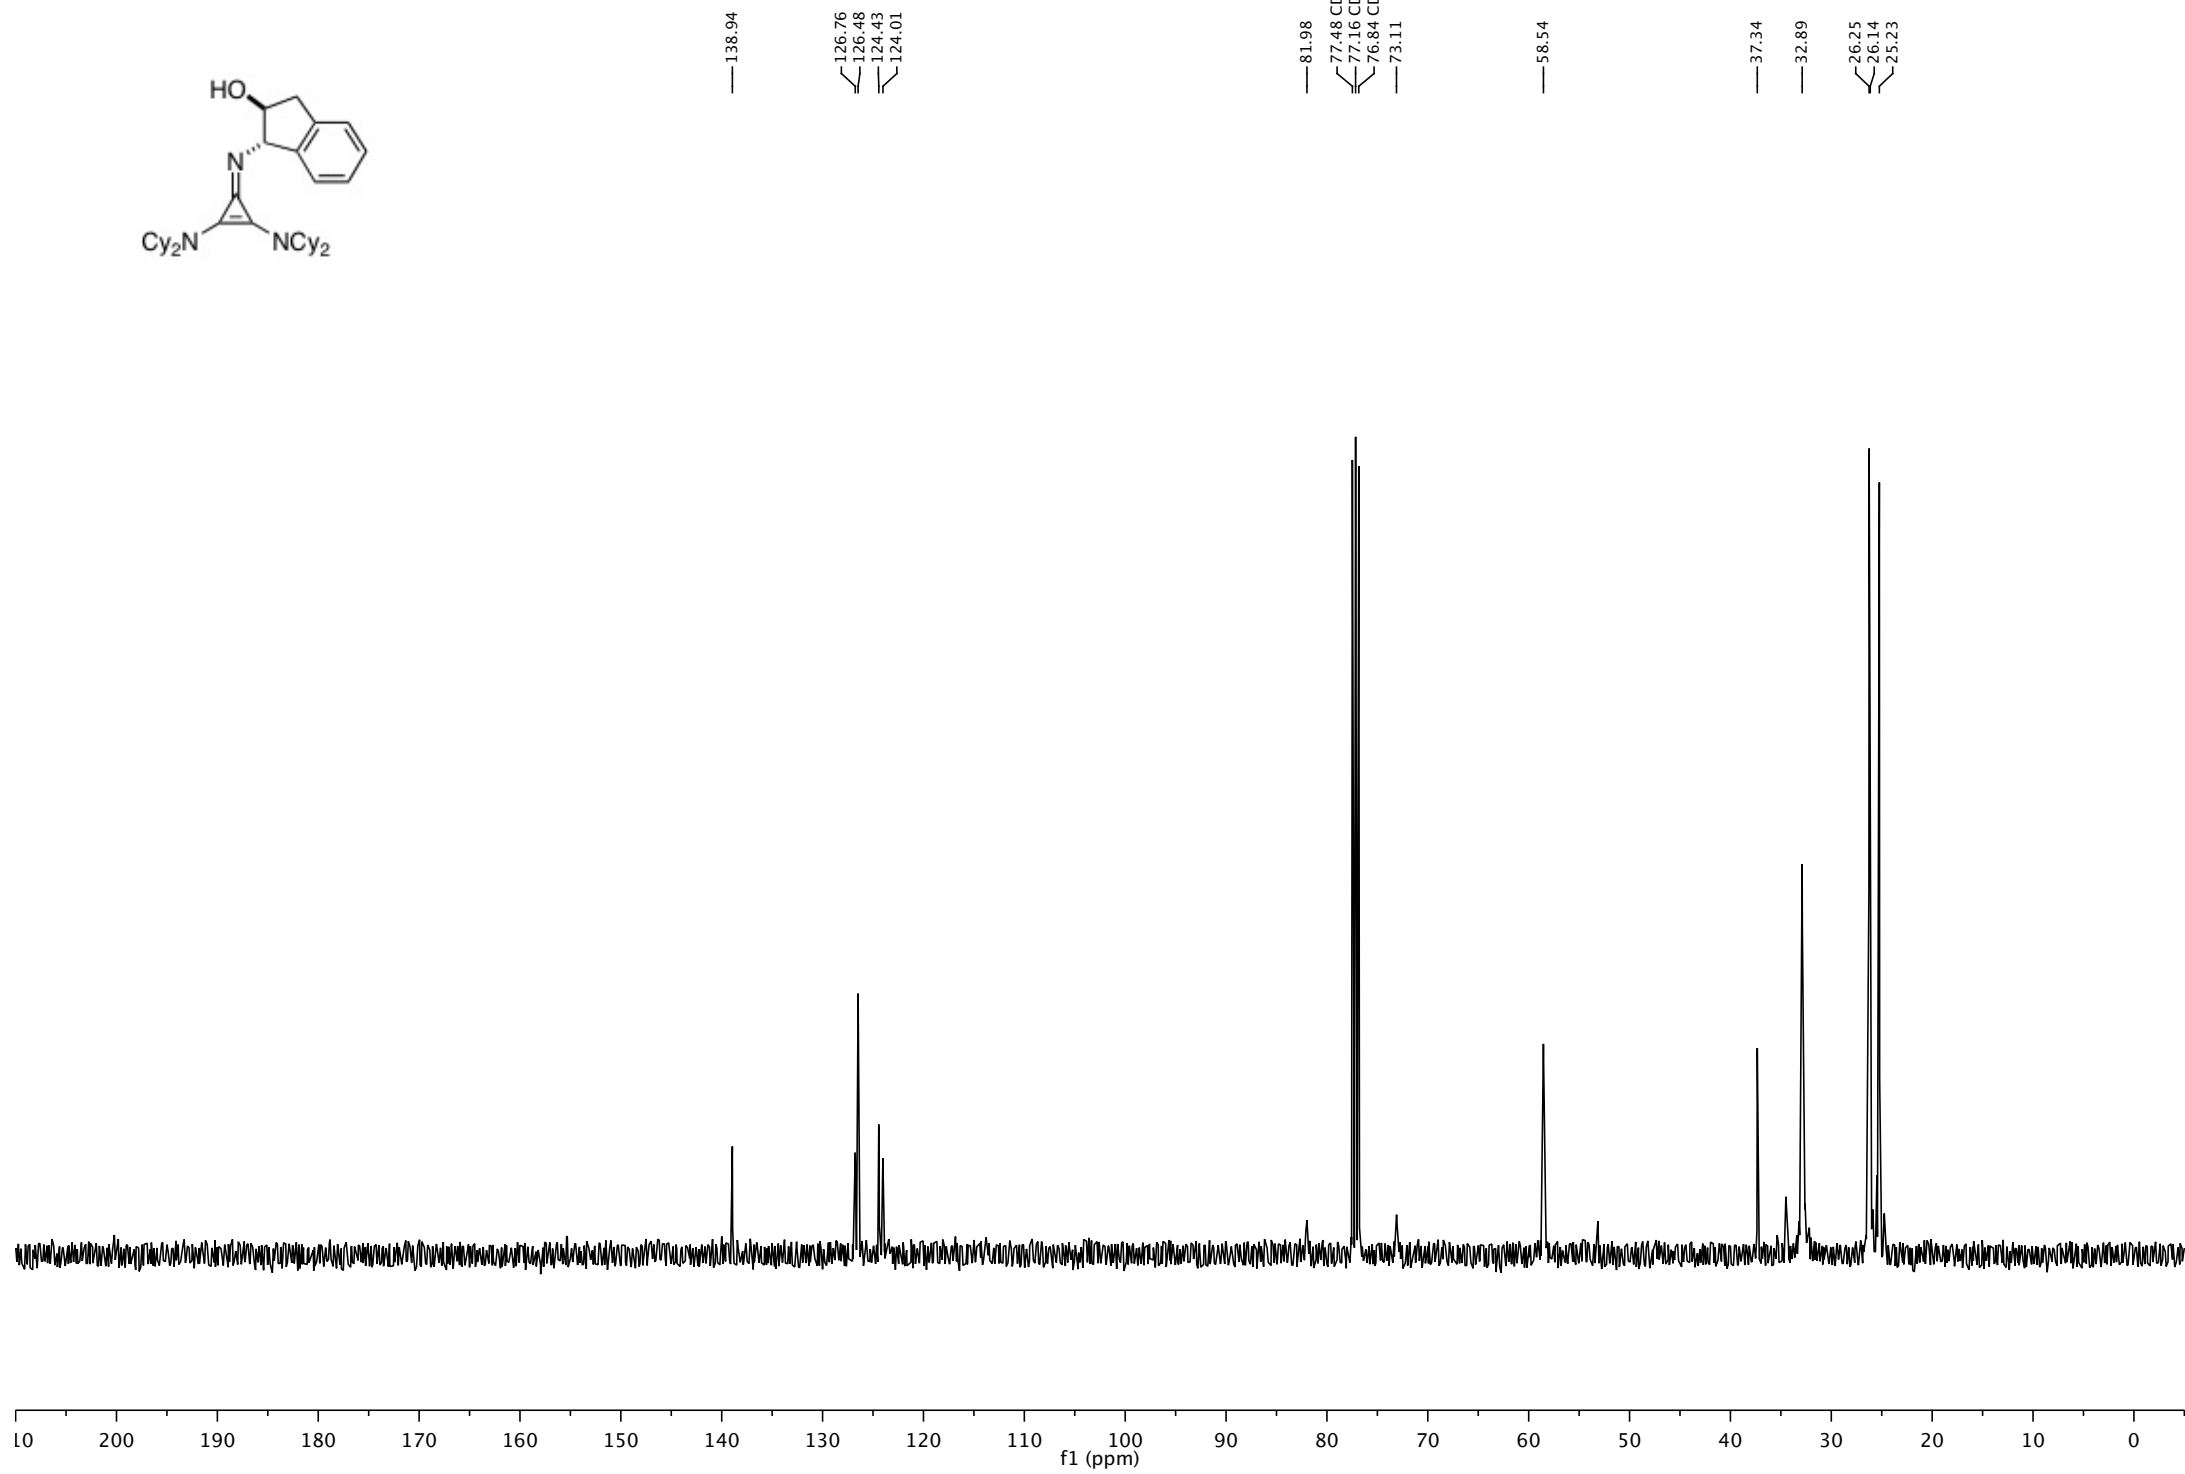

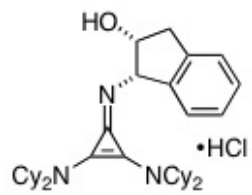

7.28  
7.27  
7.25  
7.20  
7.18  
6.78  
6.59  
6.57

5.05  
5.04  
5.03  
5.01

3.42  
3.41  
3.40  
3.39  
3.38  
3.36  
3.35  
3.30  
3.26  
3.20  
3.19

1.93  
1.88  
1.87  
1.85  
1.84  
1.66  
1.64  
1.63  
1.62  
1.25

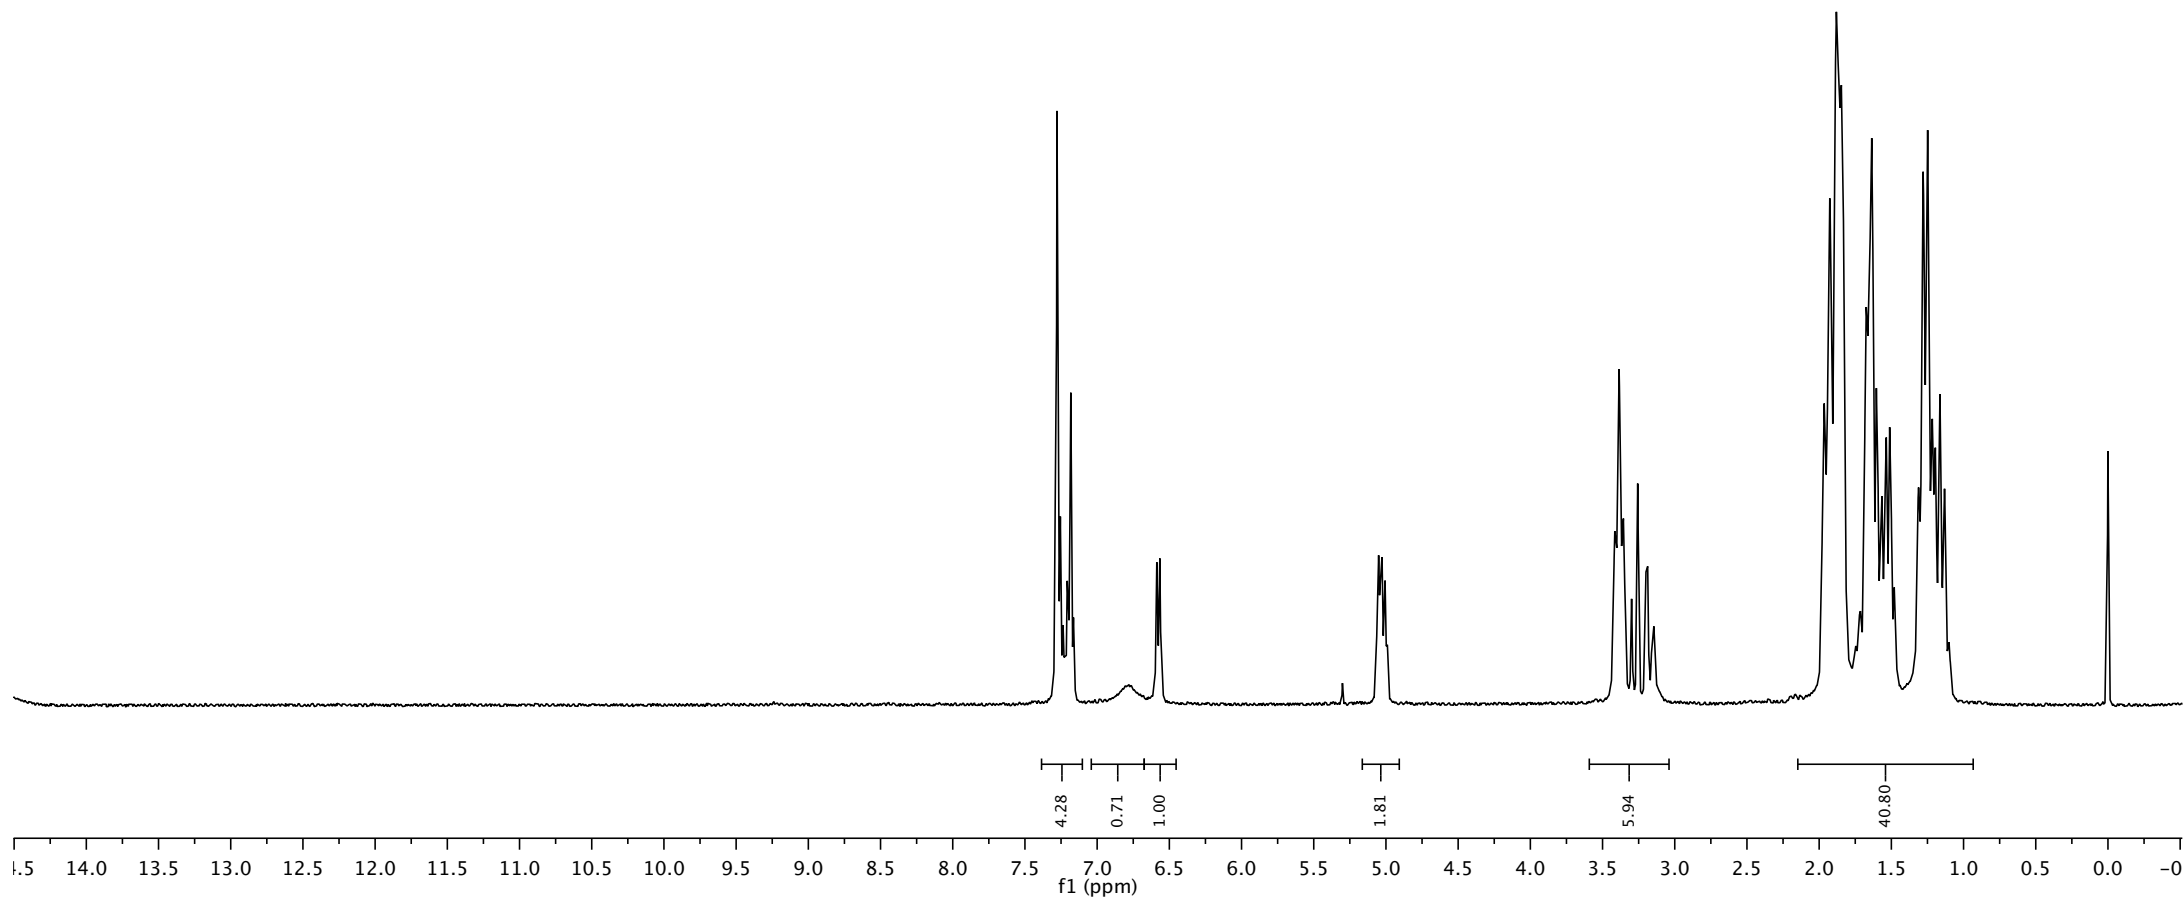

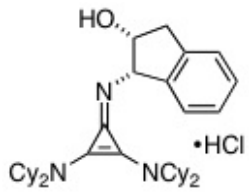

141.38  
140.38

128.55  
126.73  
125.86  
123.55

115.77  
114.56

77.48 CDCl<sub>3</sub>  
77.16 CDCl<sub>3</sub>  
76.84 CDCl<sub>3</sub>

63.63  
59.43

39.98

32.56  
32.48

26.13  
25.66  
25.58  
24.78

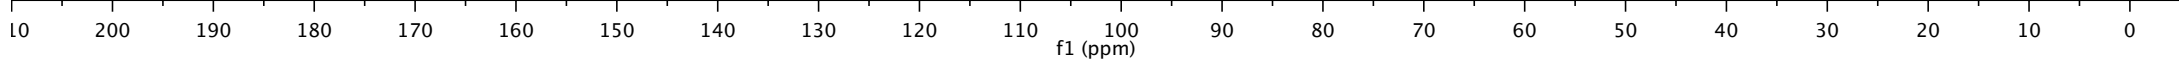

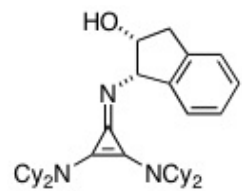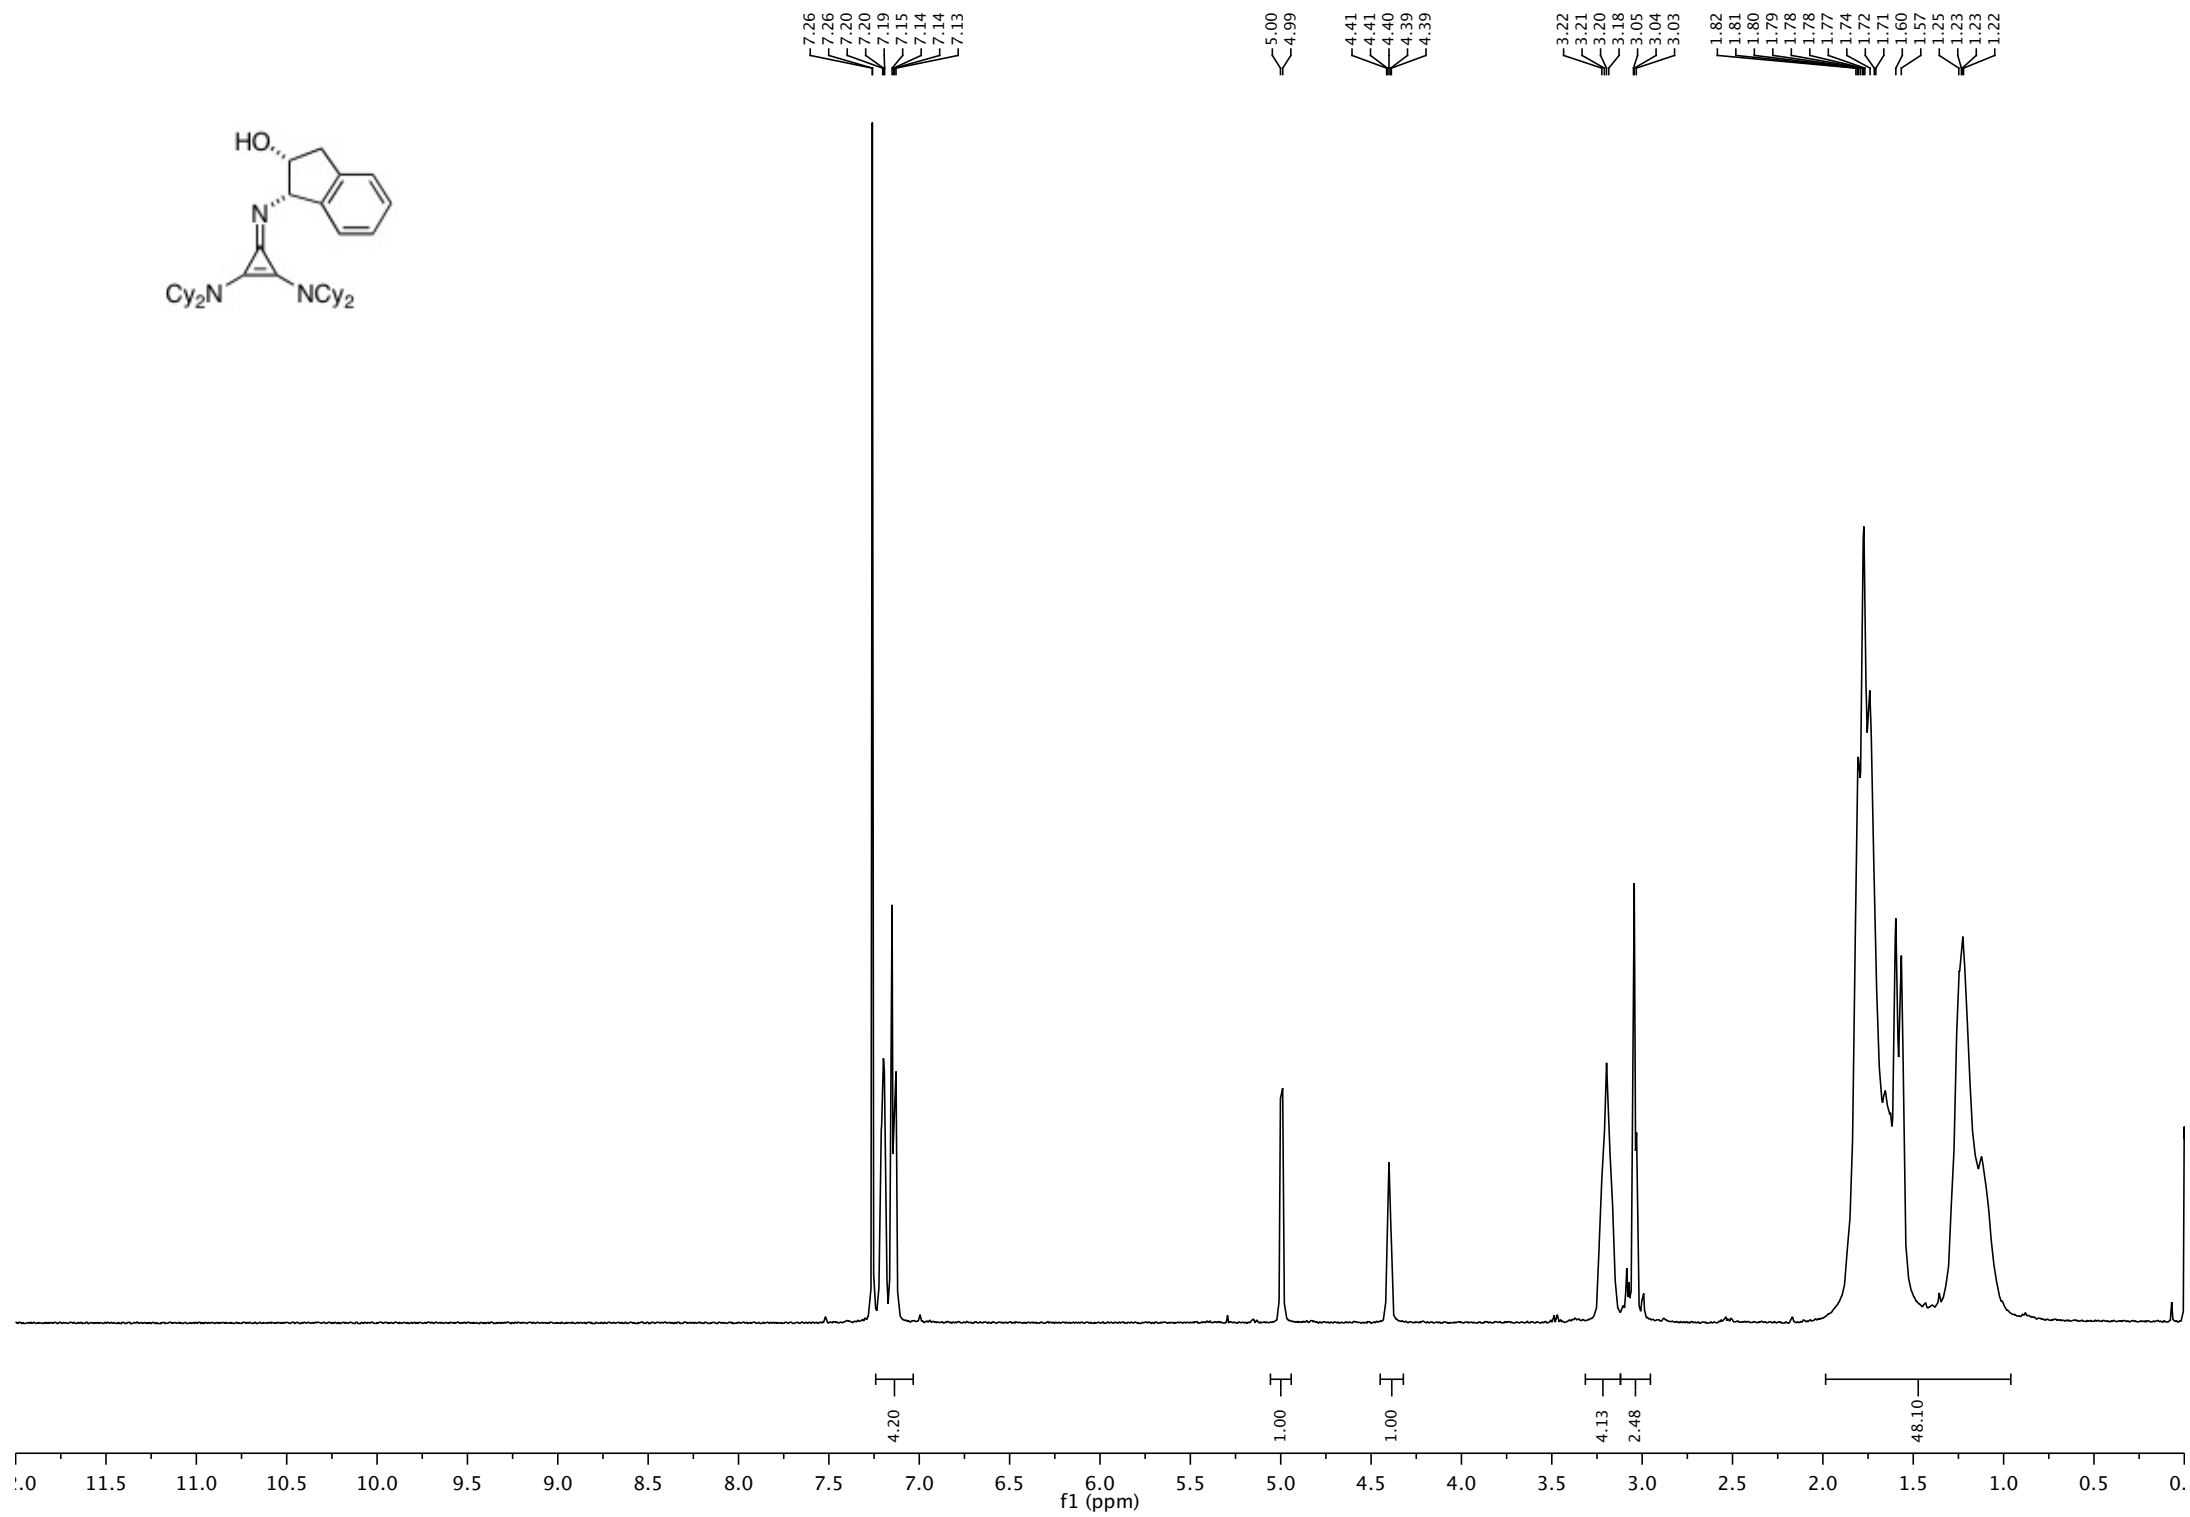

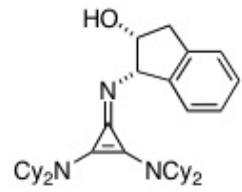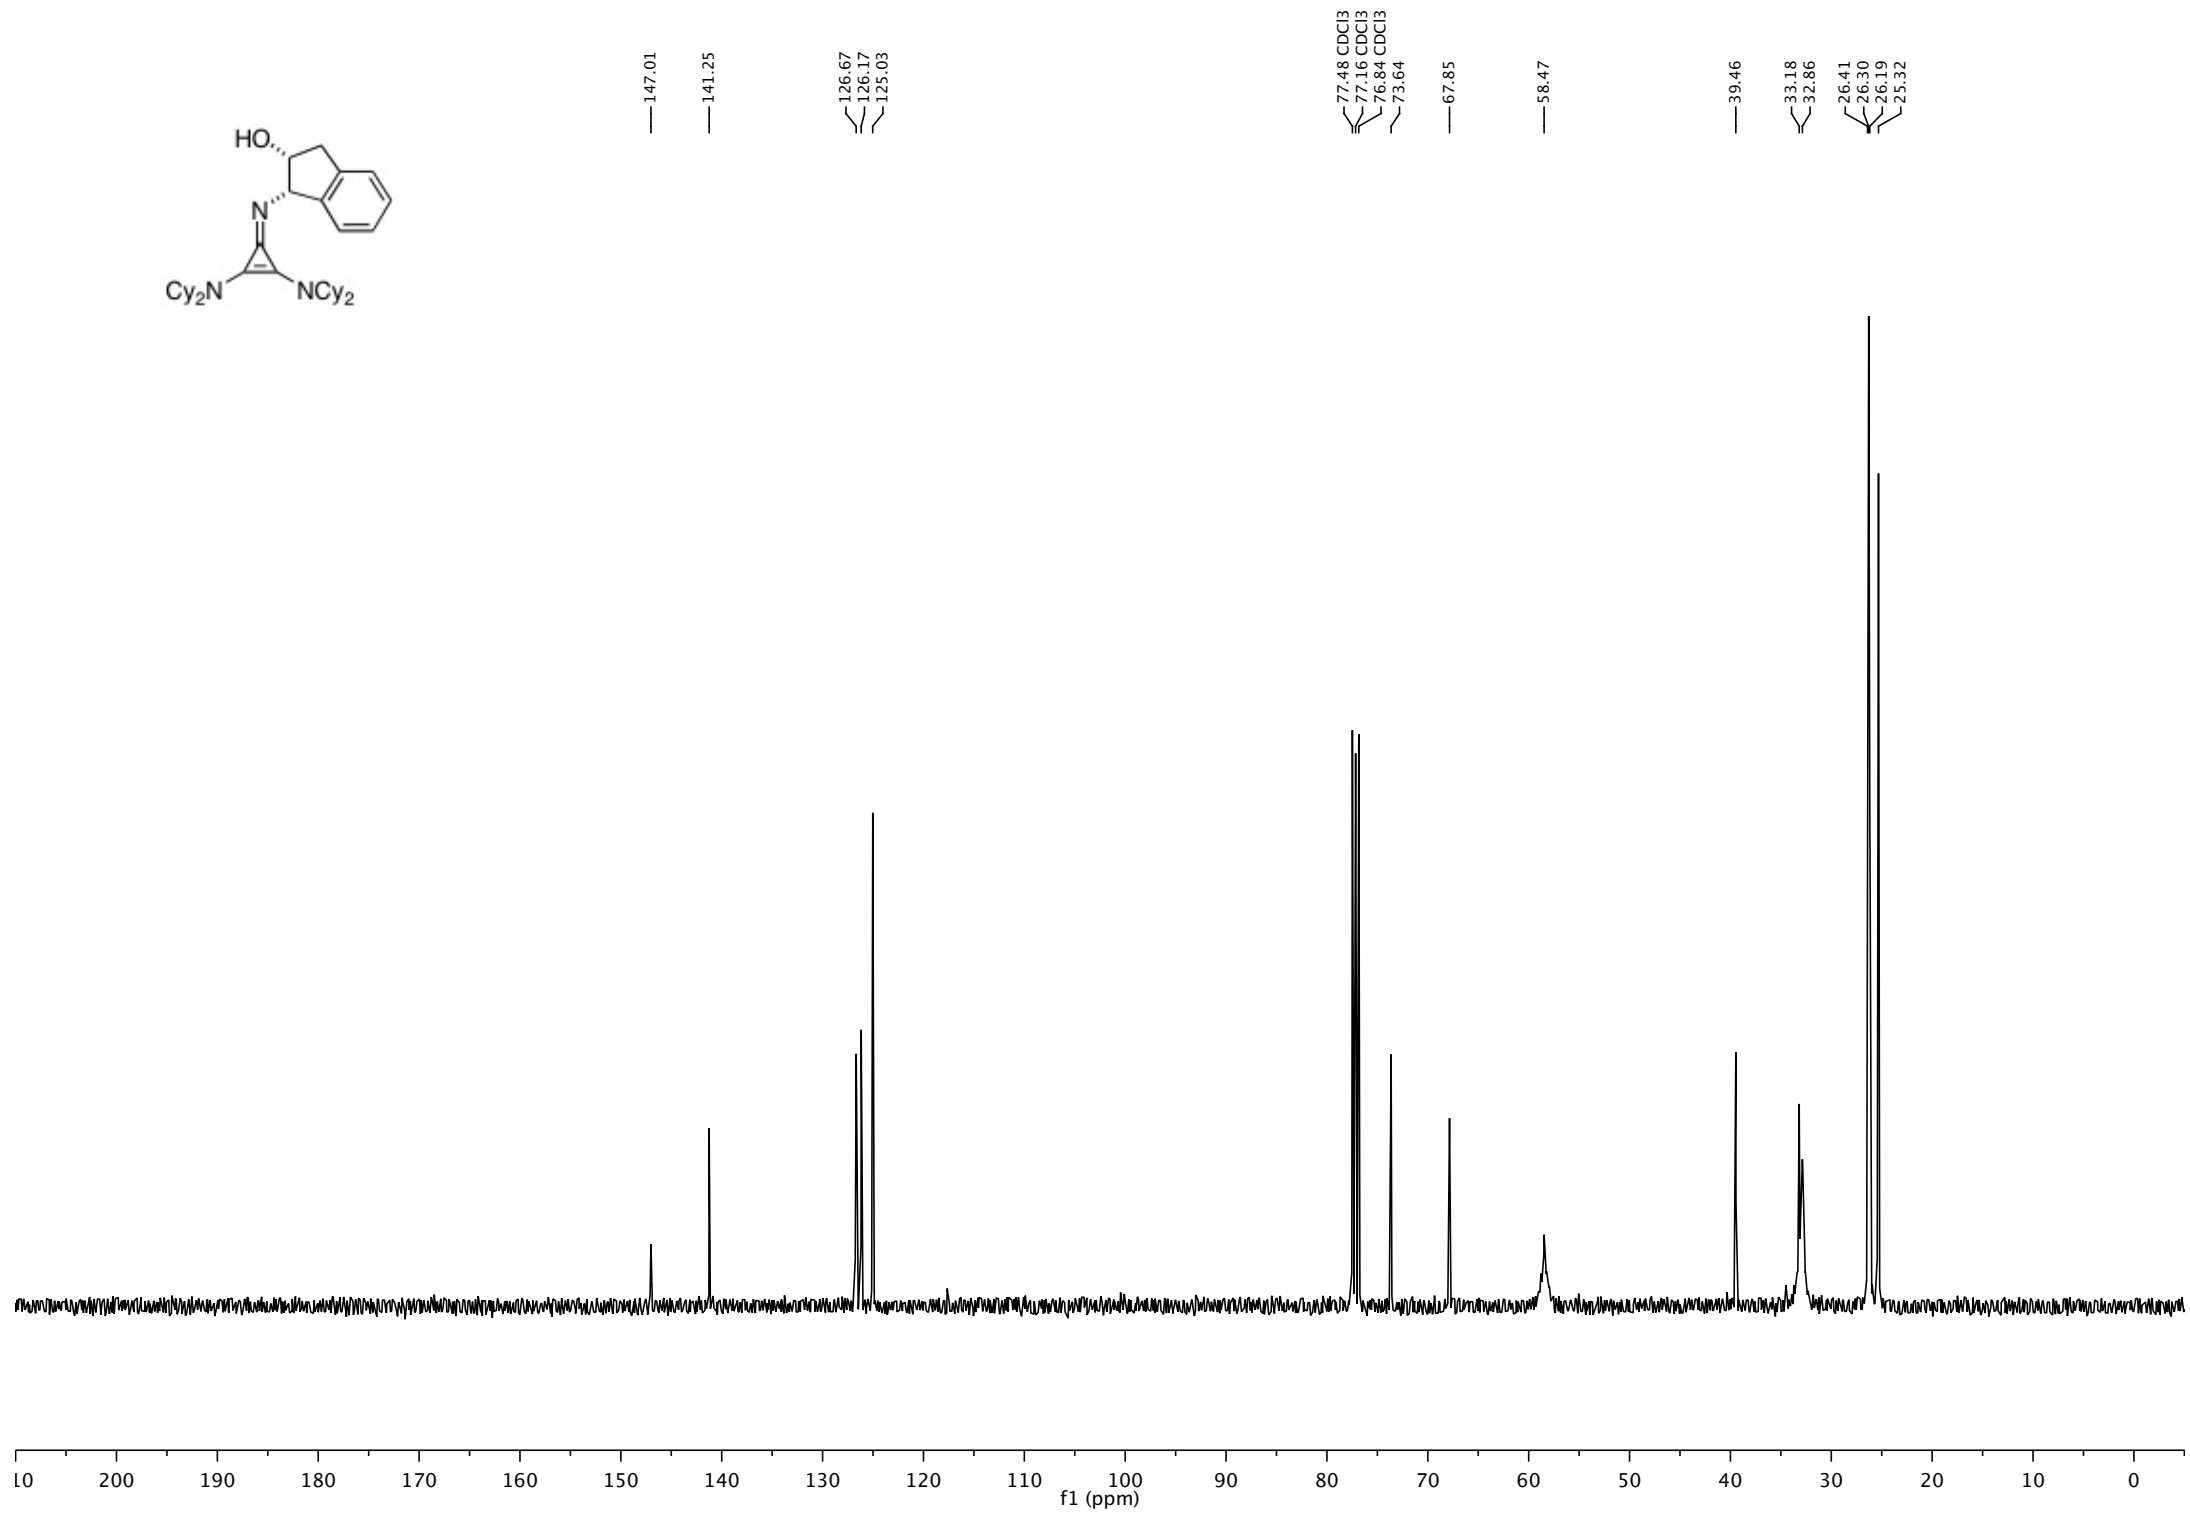



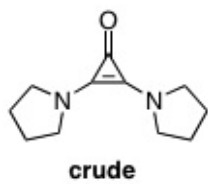

3.39  
3.38  
3.37  
3.36  
3.35  
3.34

1.89  
1.88  
1.87  
1.85

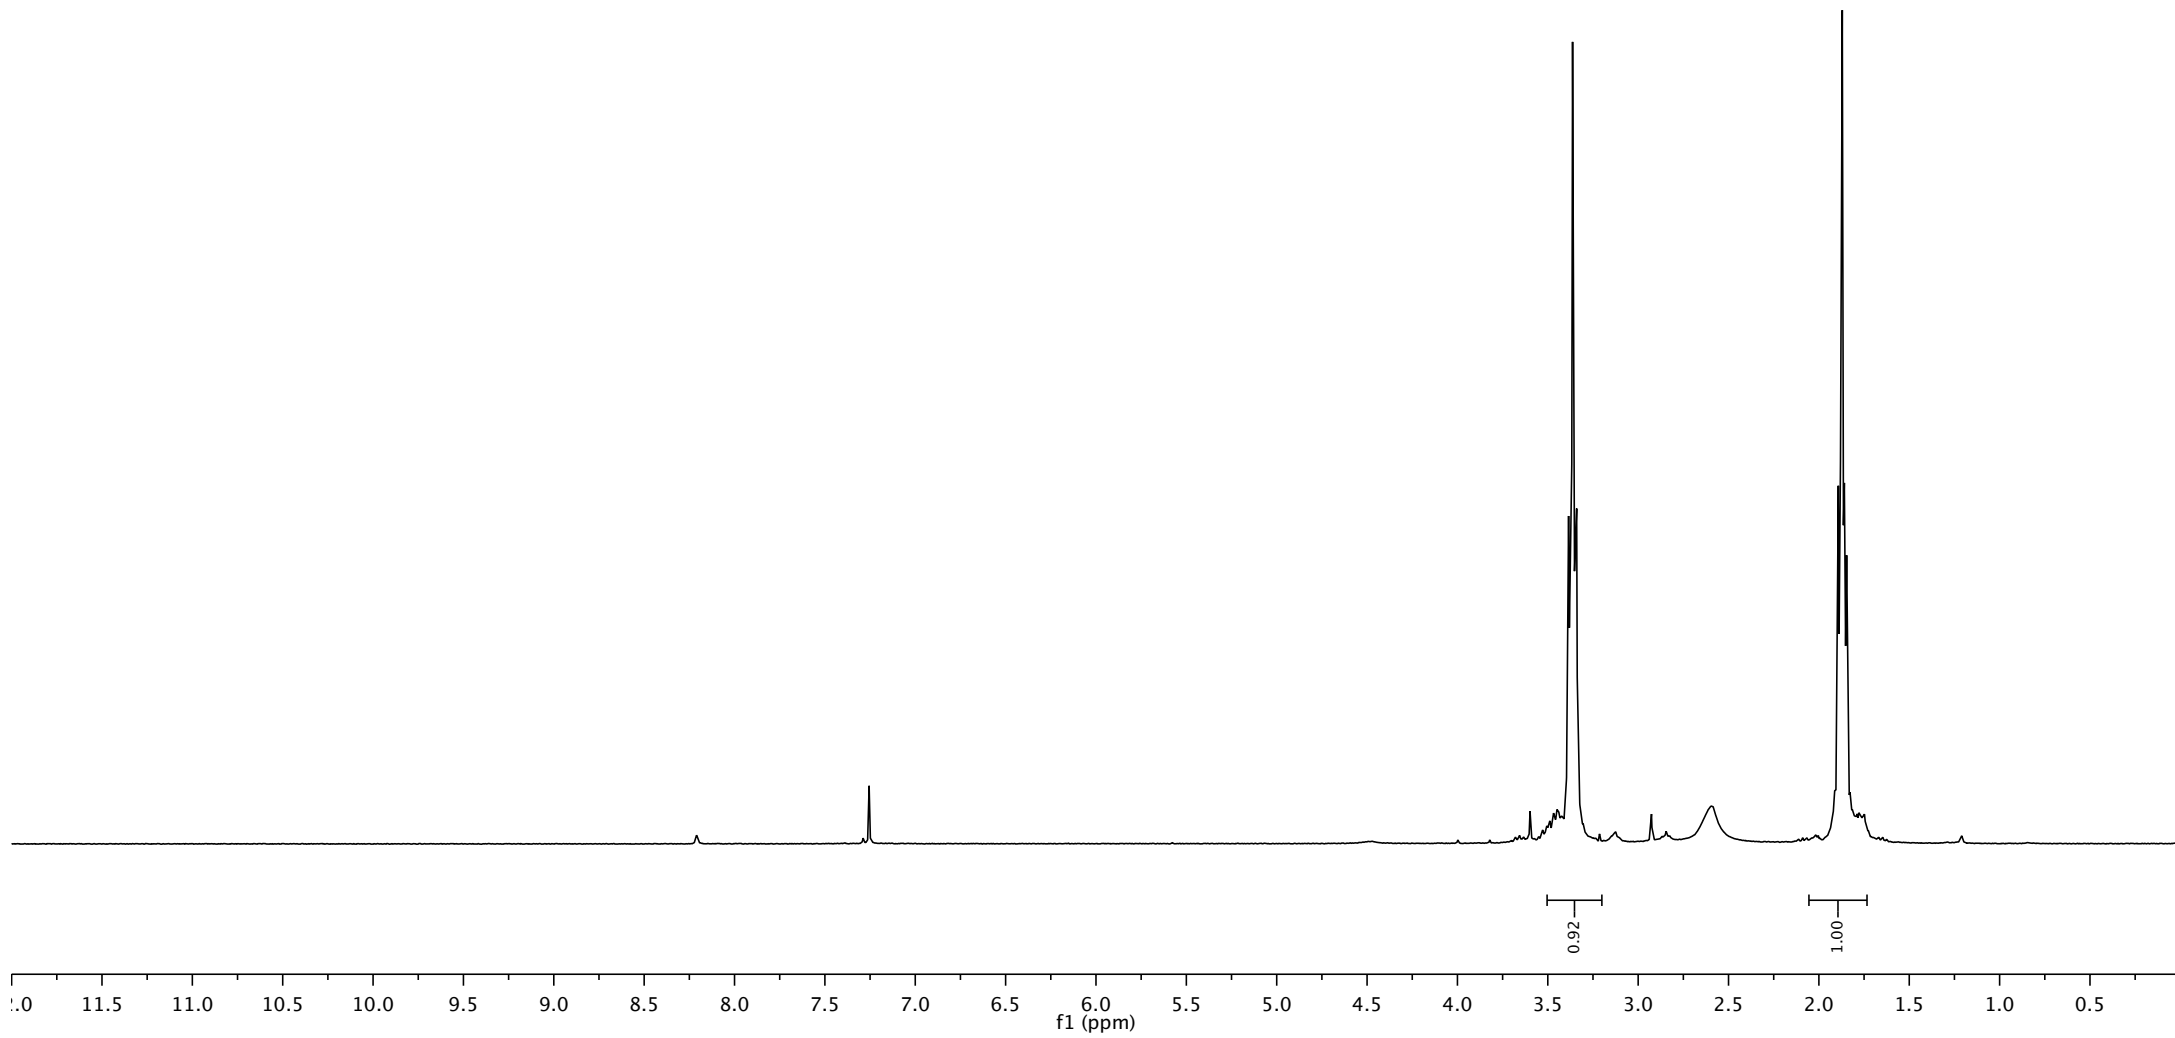

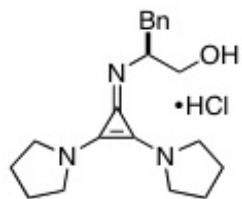

8.91  
8.89

7.32  
7.30  
7.30  
7.29  
7.27  
7.27  
7.26  
7.21

4.87

3.71  
3.71  
3.69  
3.68

3.42  
3.42  
2.95  
2.93  
2.92  
2.91  
2.89  
2.87  
2.86  
2.84

1.91  
1.91  
1.90  
1.89  
1.89

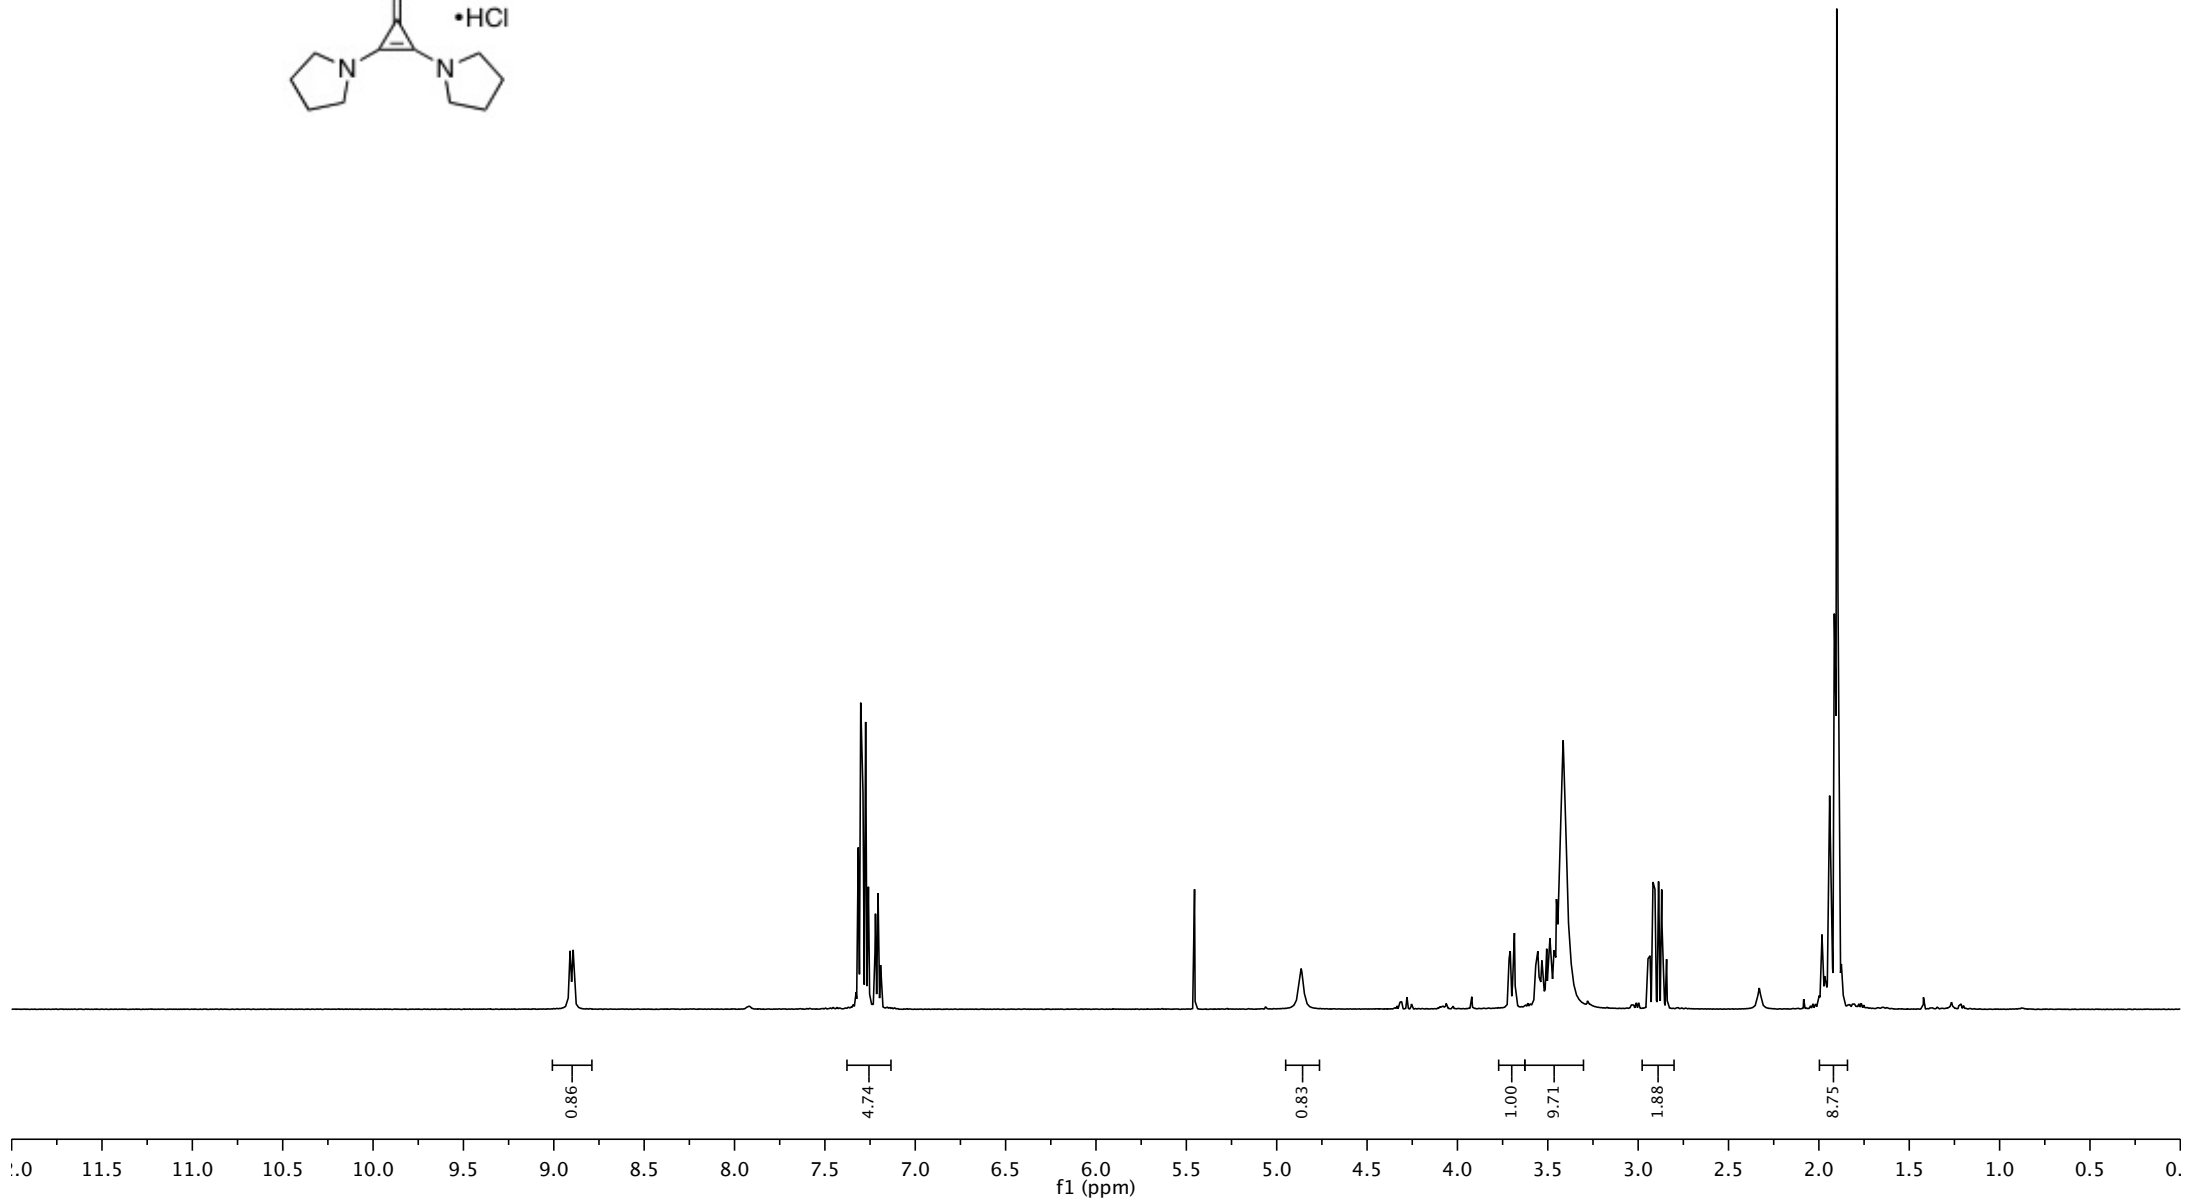

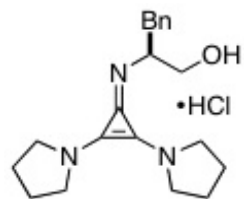

— 139.84

— 130.56

— 129.27

— 127.24

— 118.26

— 115.68

— 64.84

— 63.45

— 51.28

— 38.64

— 26.34

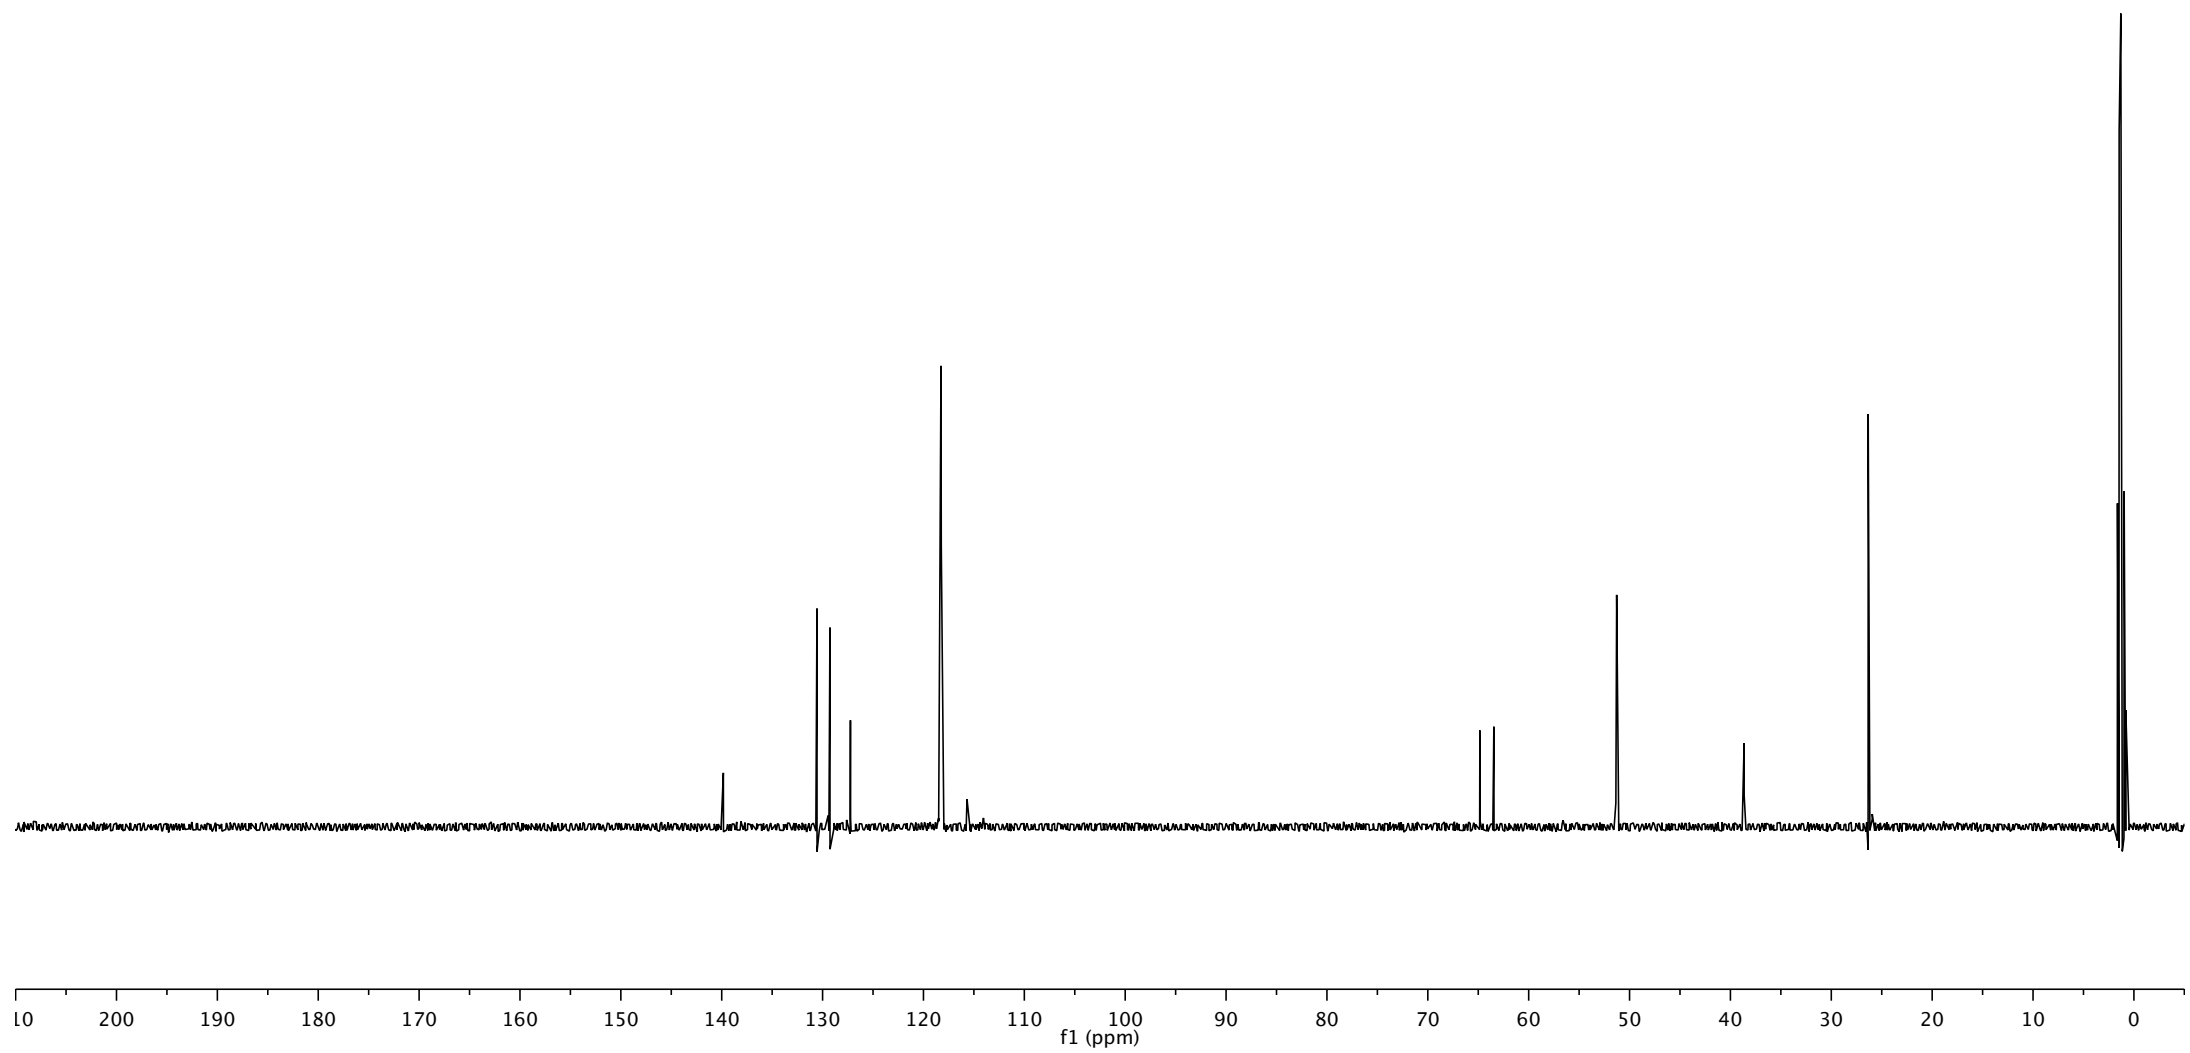

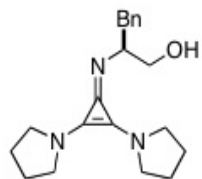

7.27  
7.25  
7.24  
7.22  
7.18  
7.17  
7.16

3.53  
3.53  
3.47  
3.44  
3.44  
3.38  
3.35  
3.33  
3.33  
3.28  
3.25  
3.25  
2.77  
2.76  
2.75

1.87  
1.86  
1.85  
1.84  
1.84

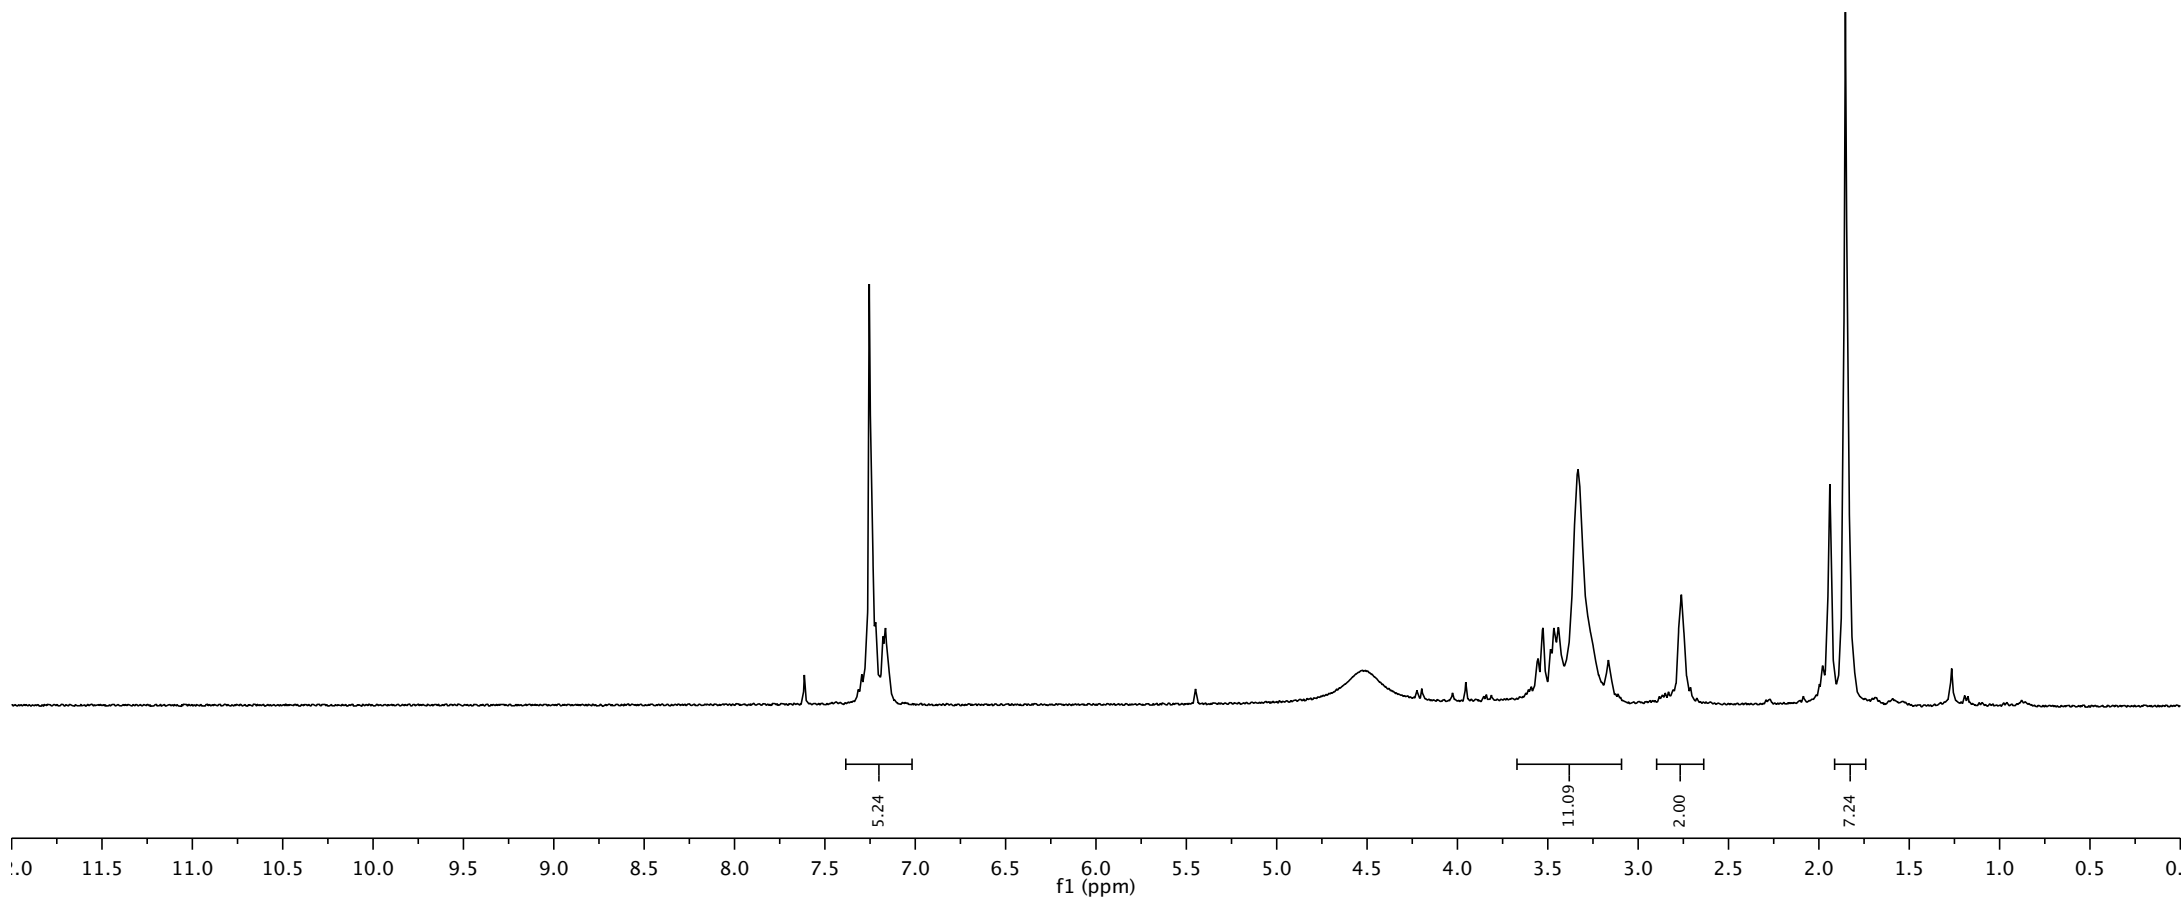

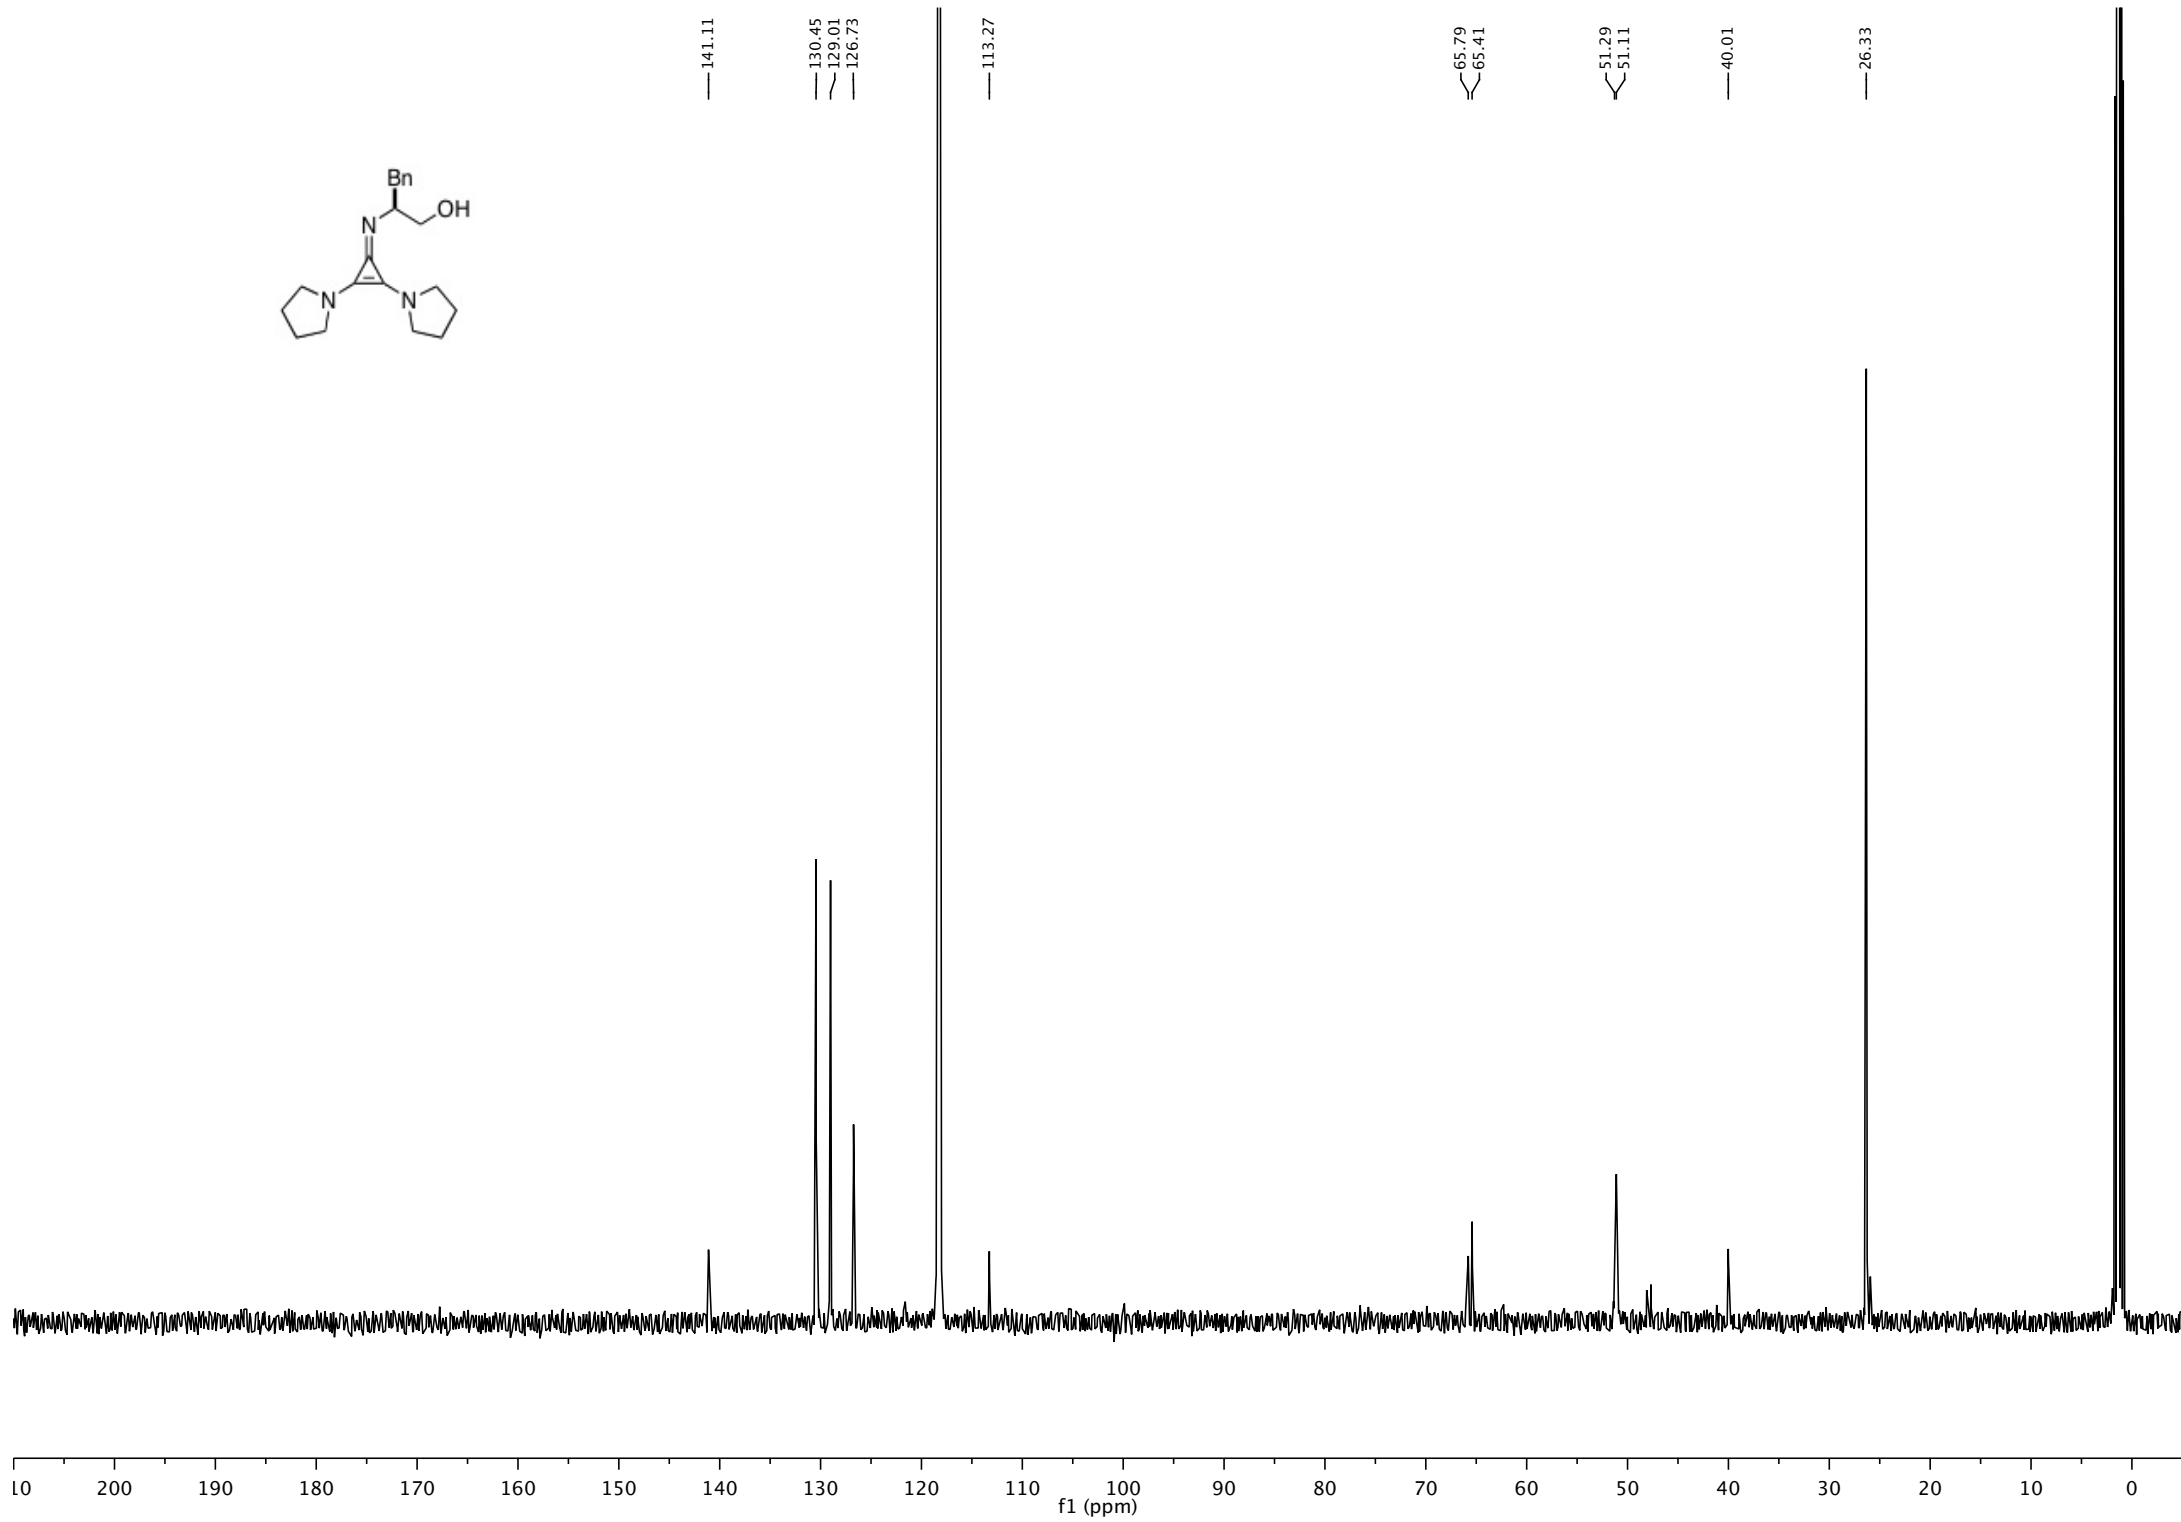

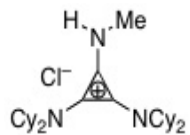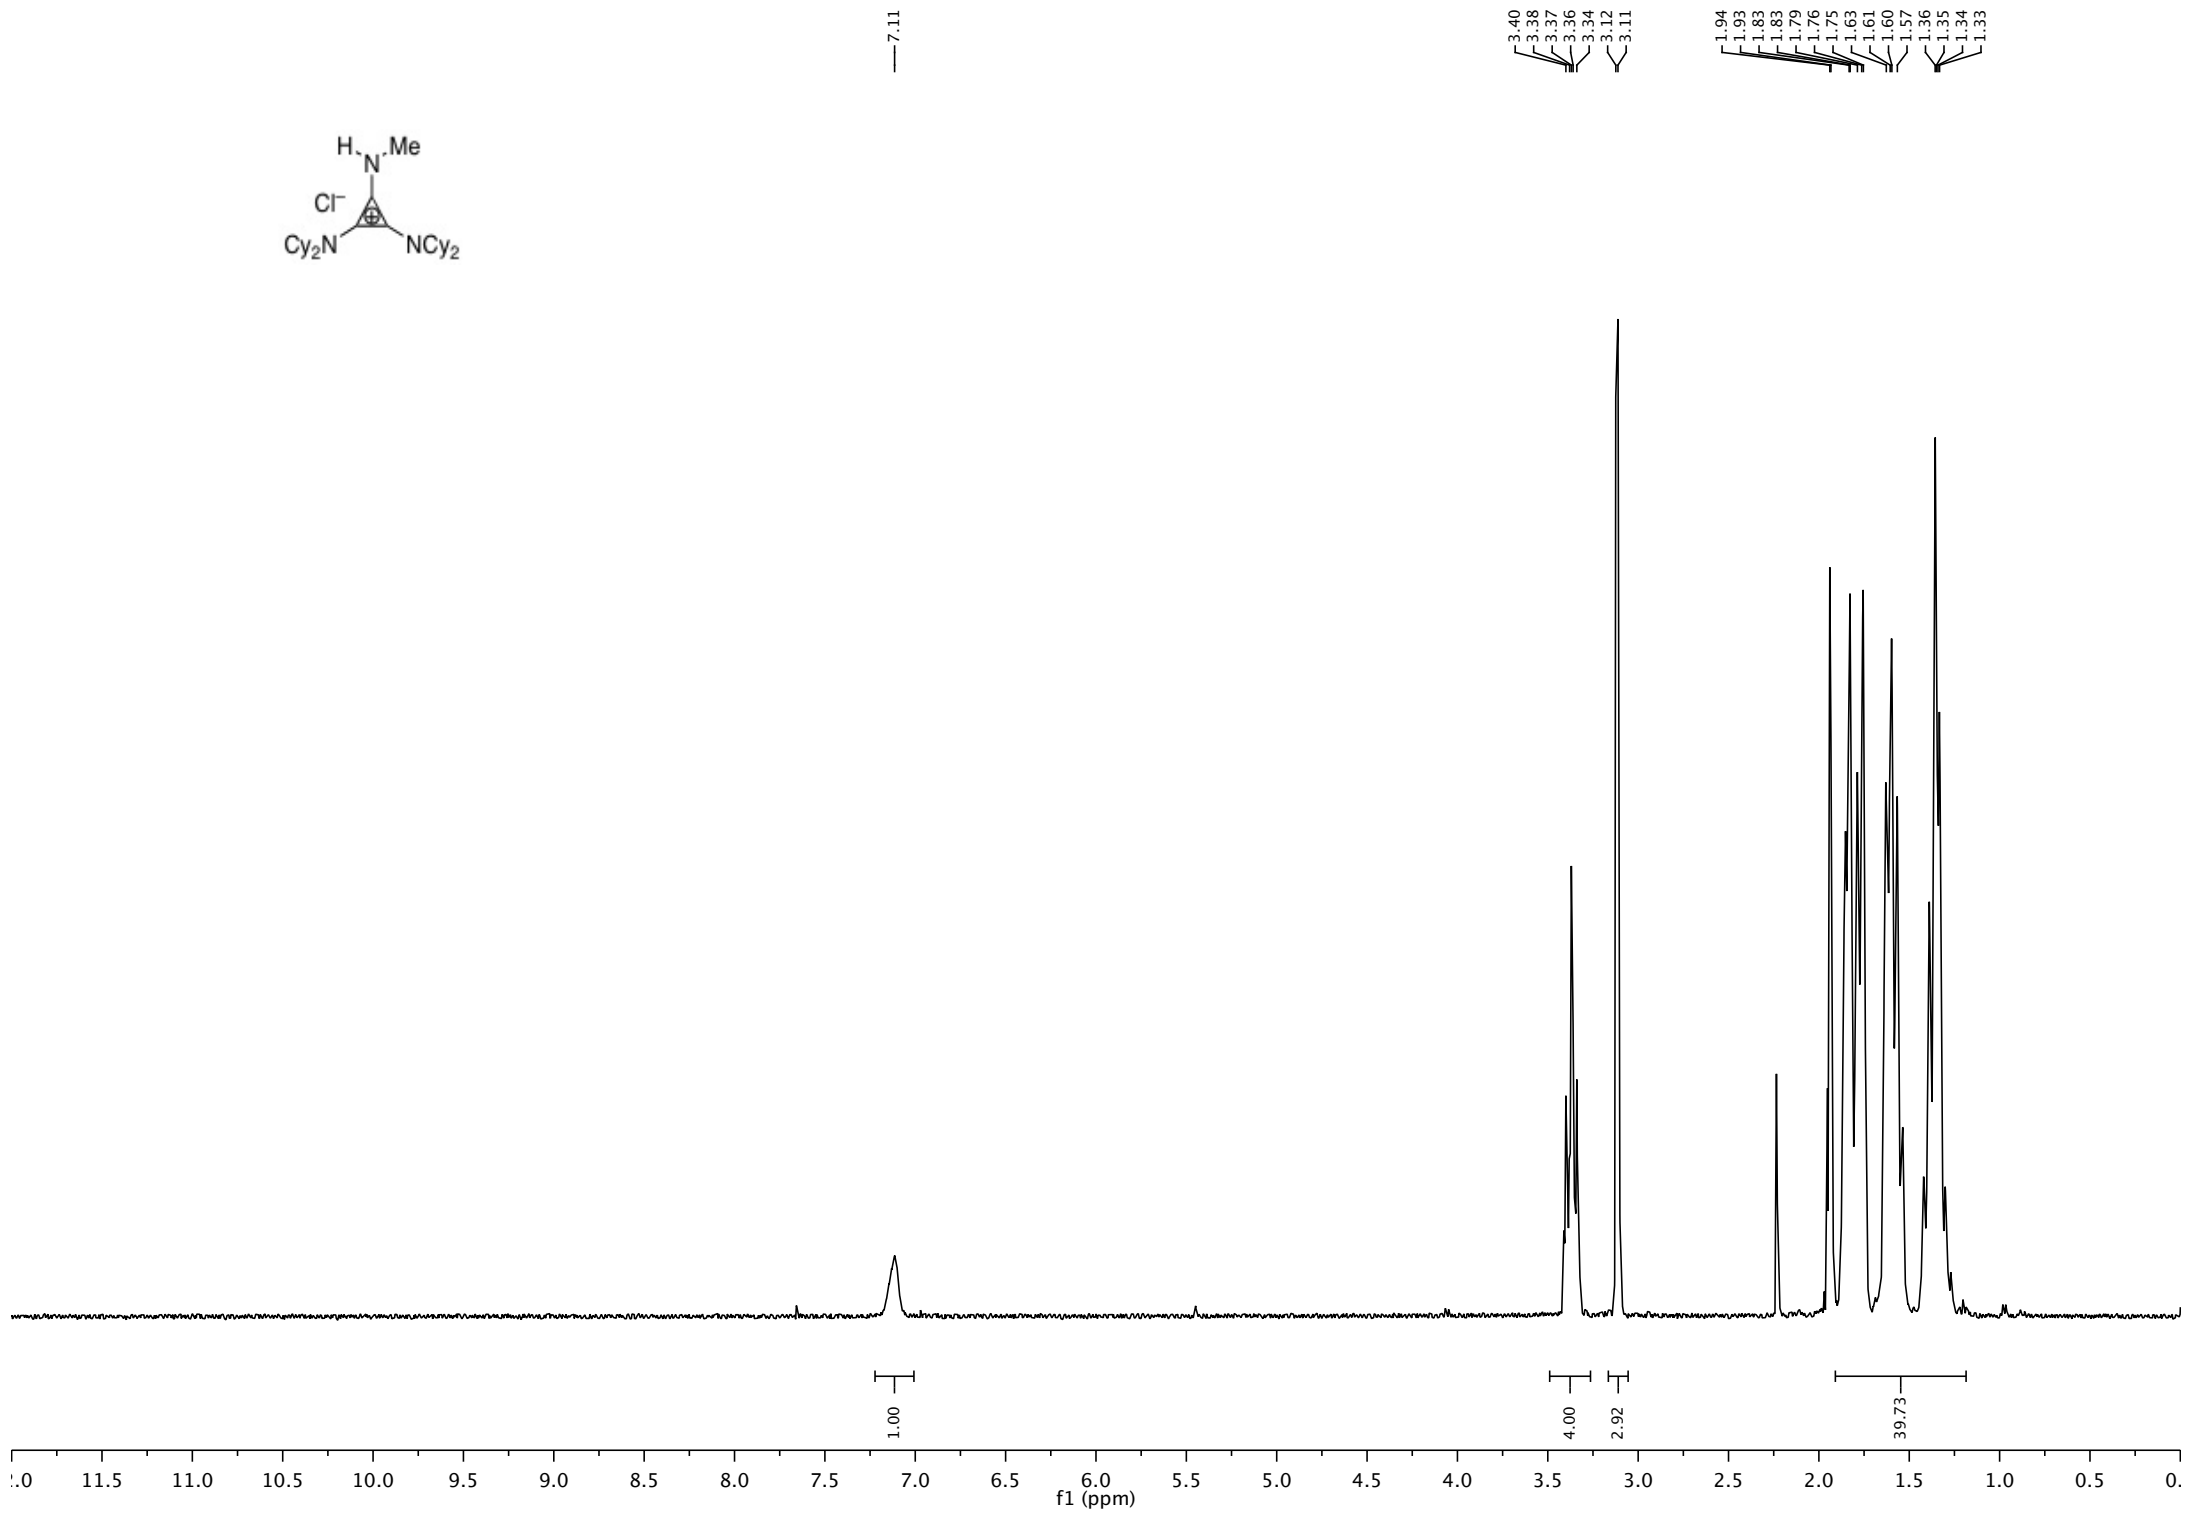

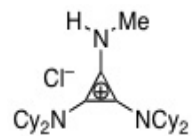

118.26  
117.69  
115.59

60.07

33.13  
32.67

26.46  
25.33

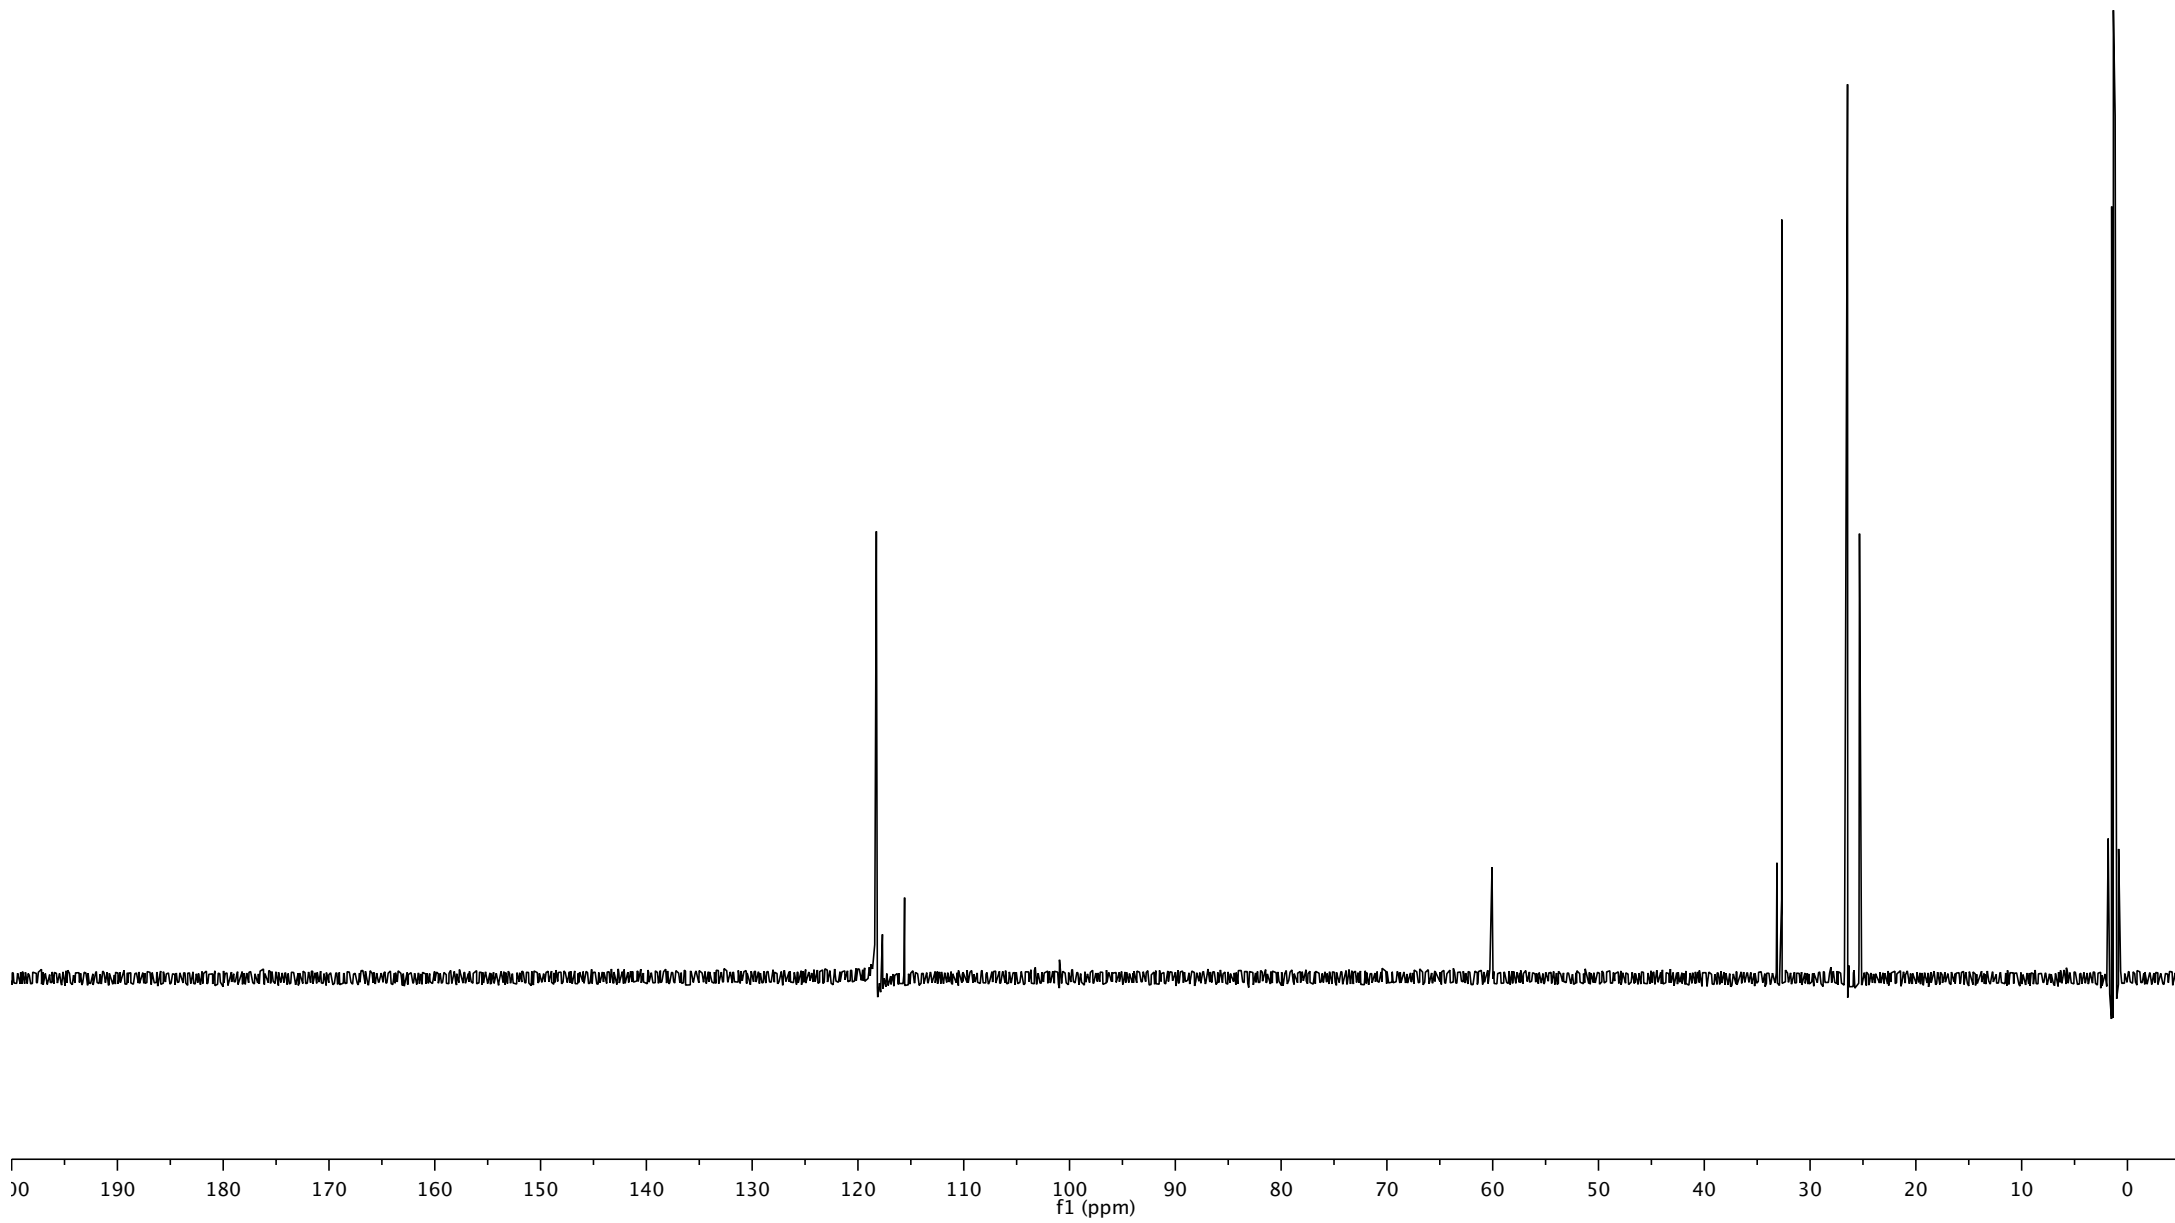

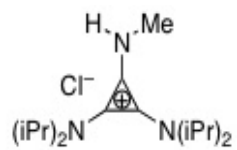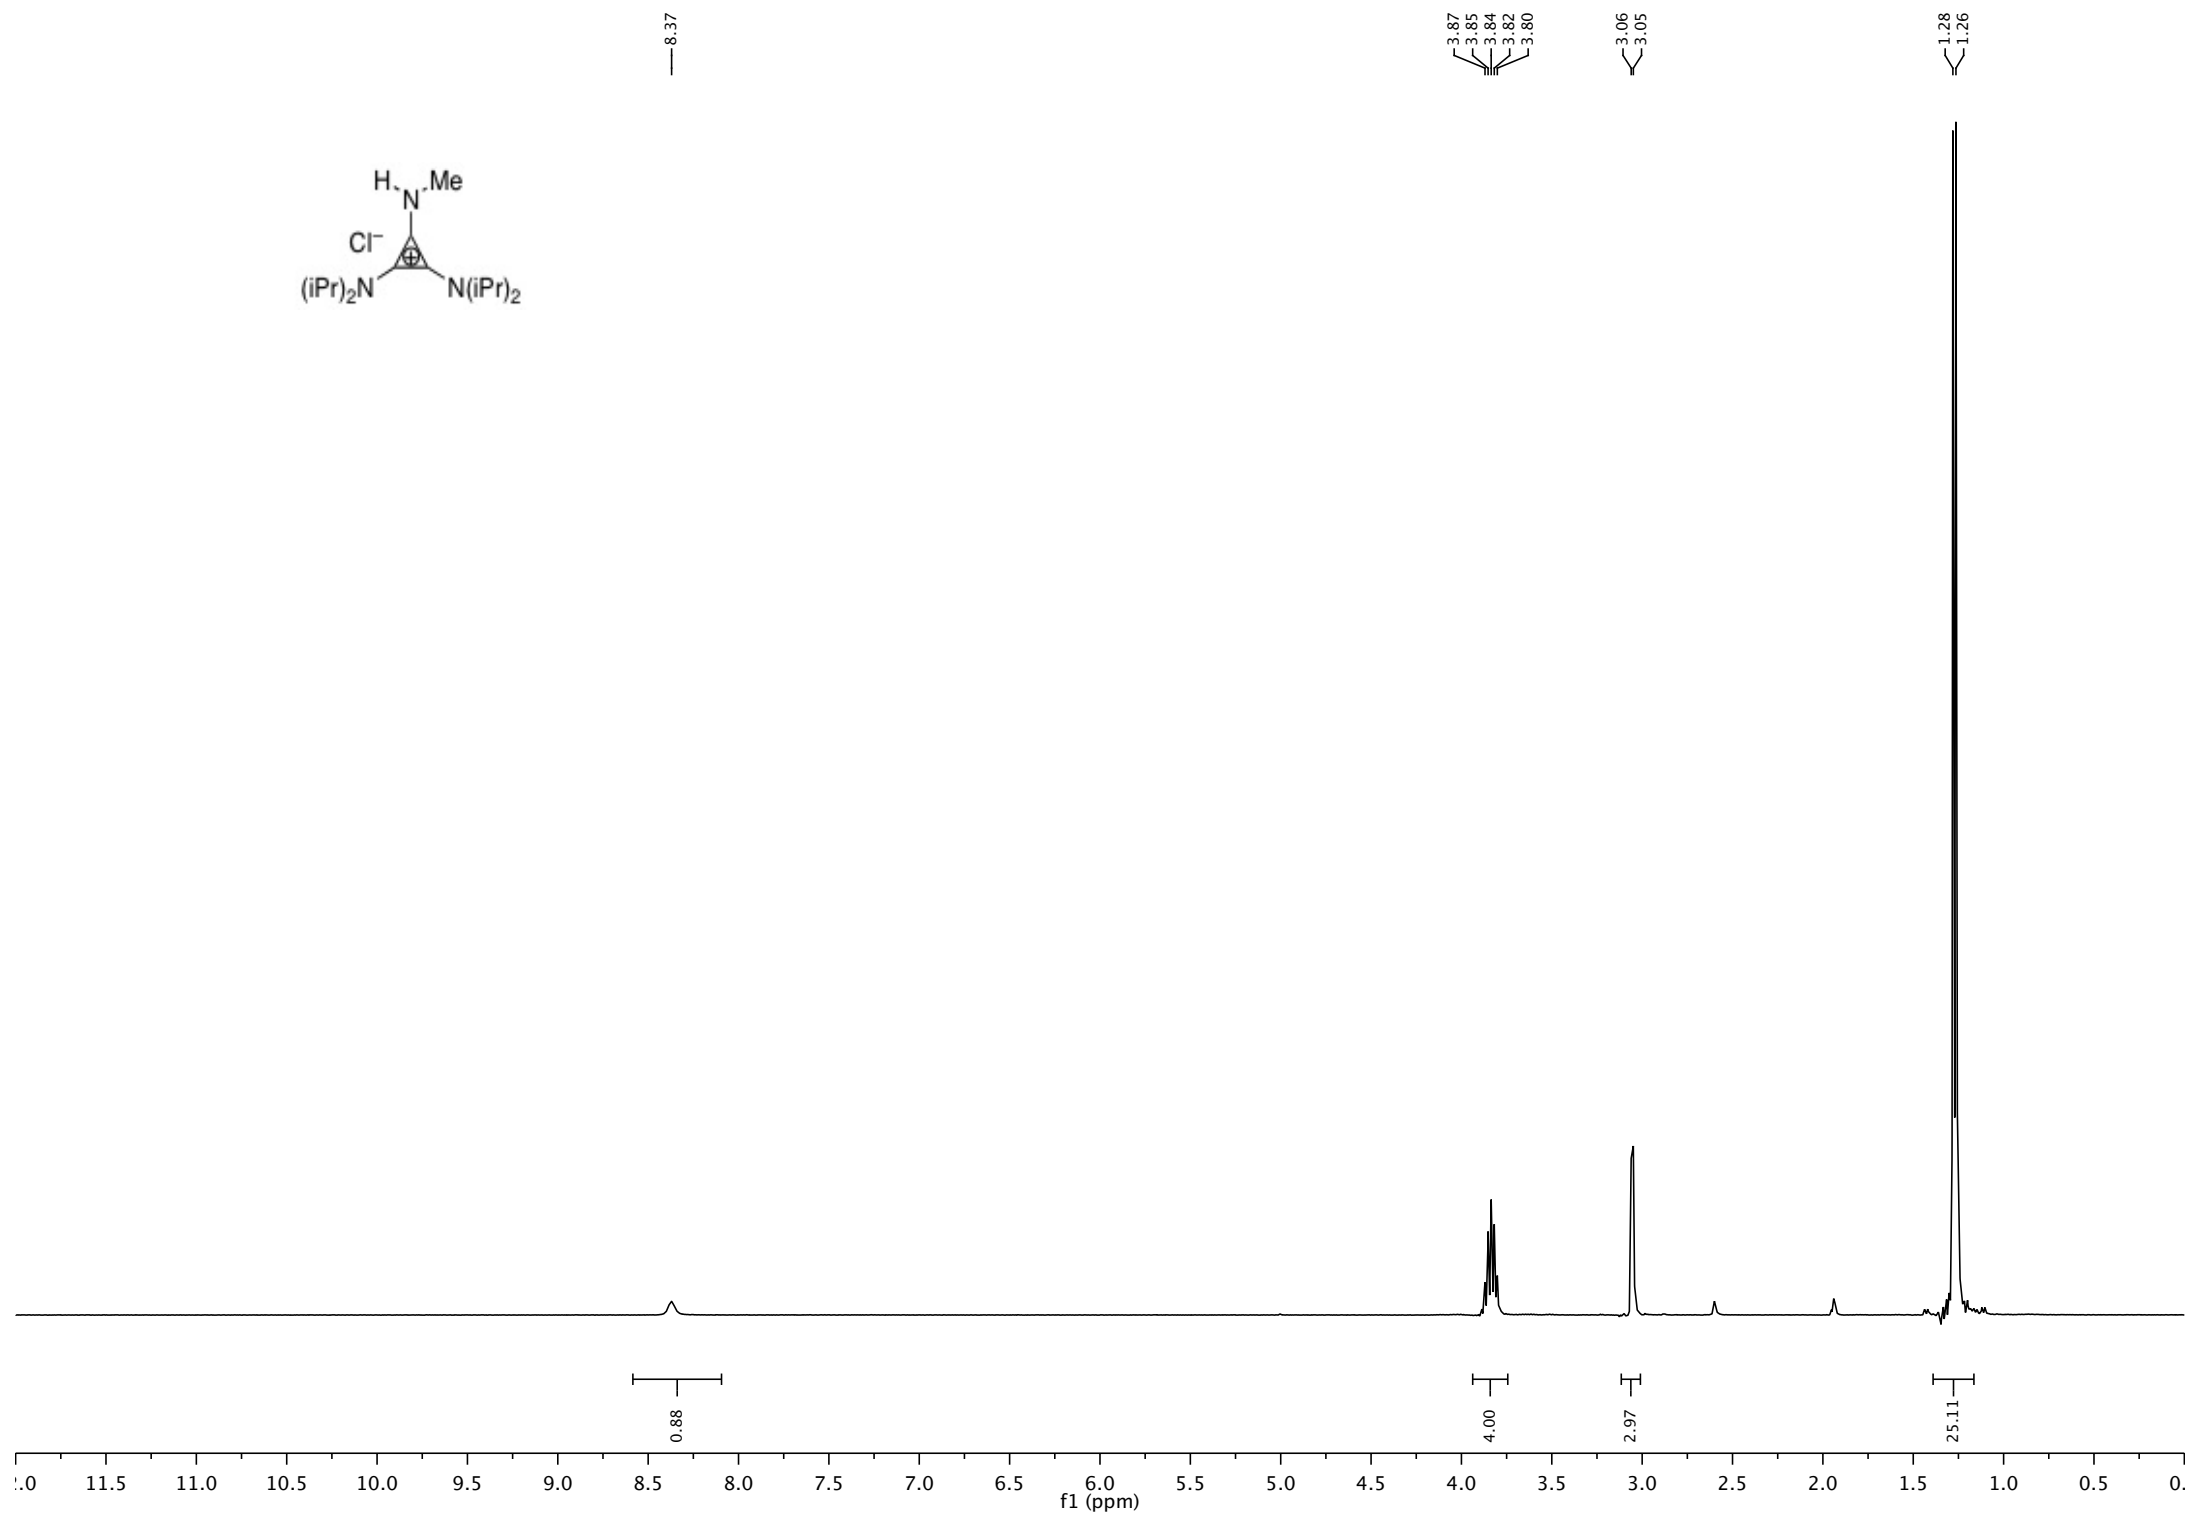



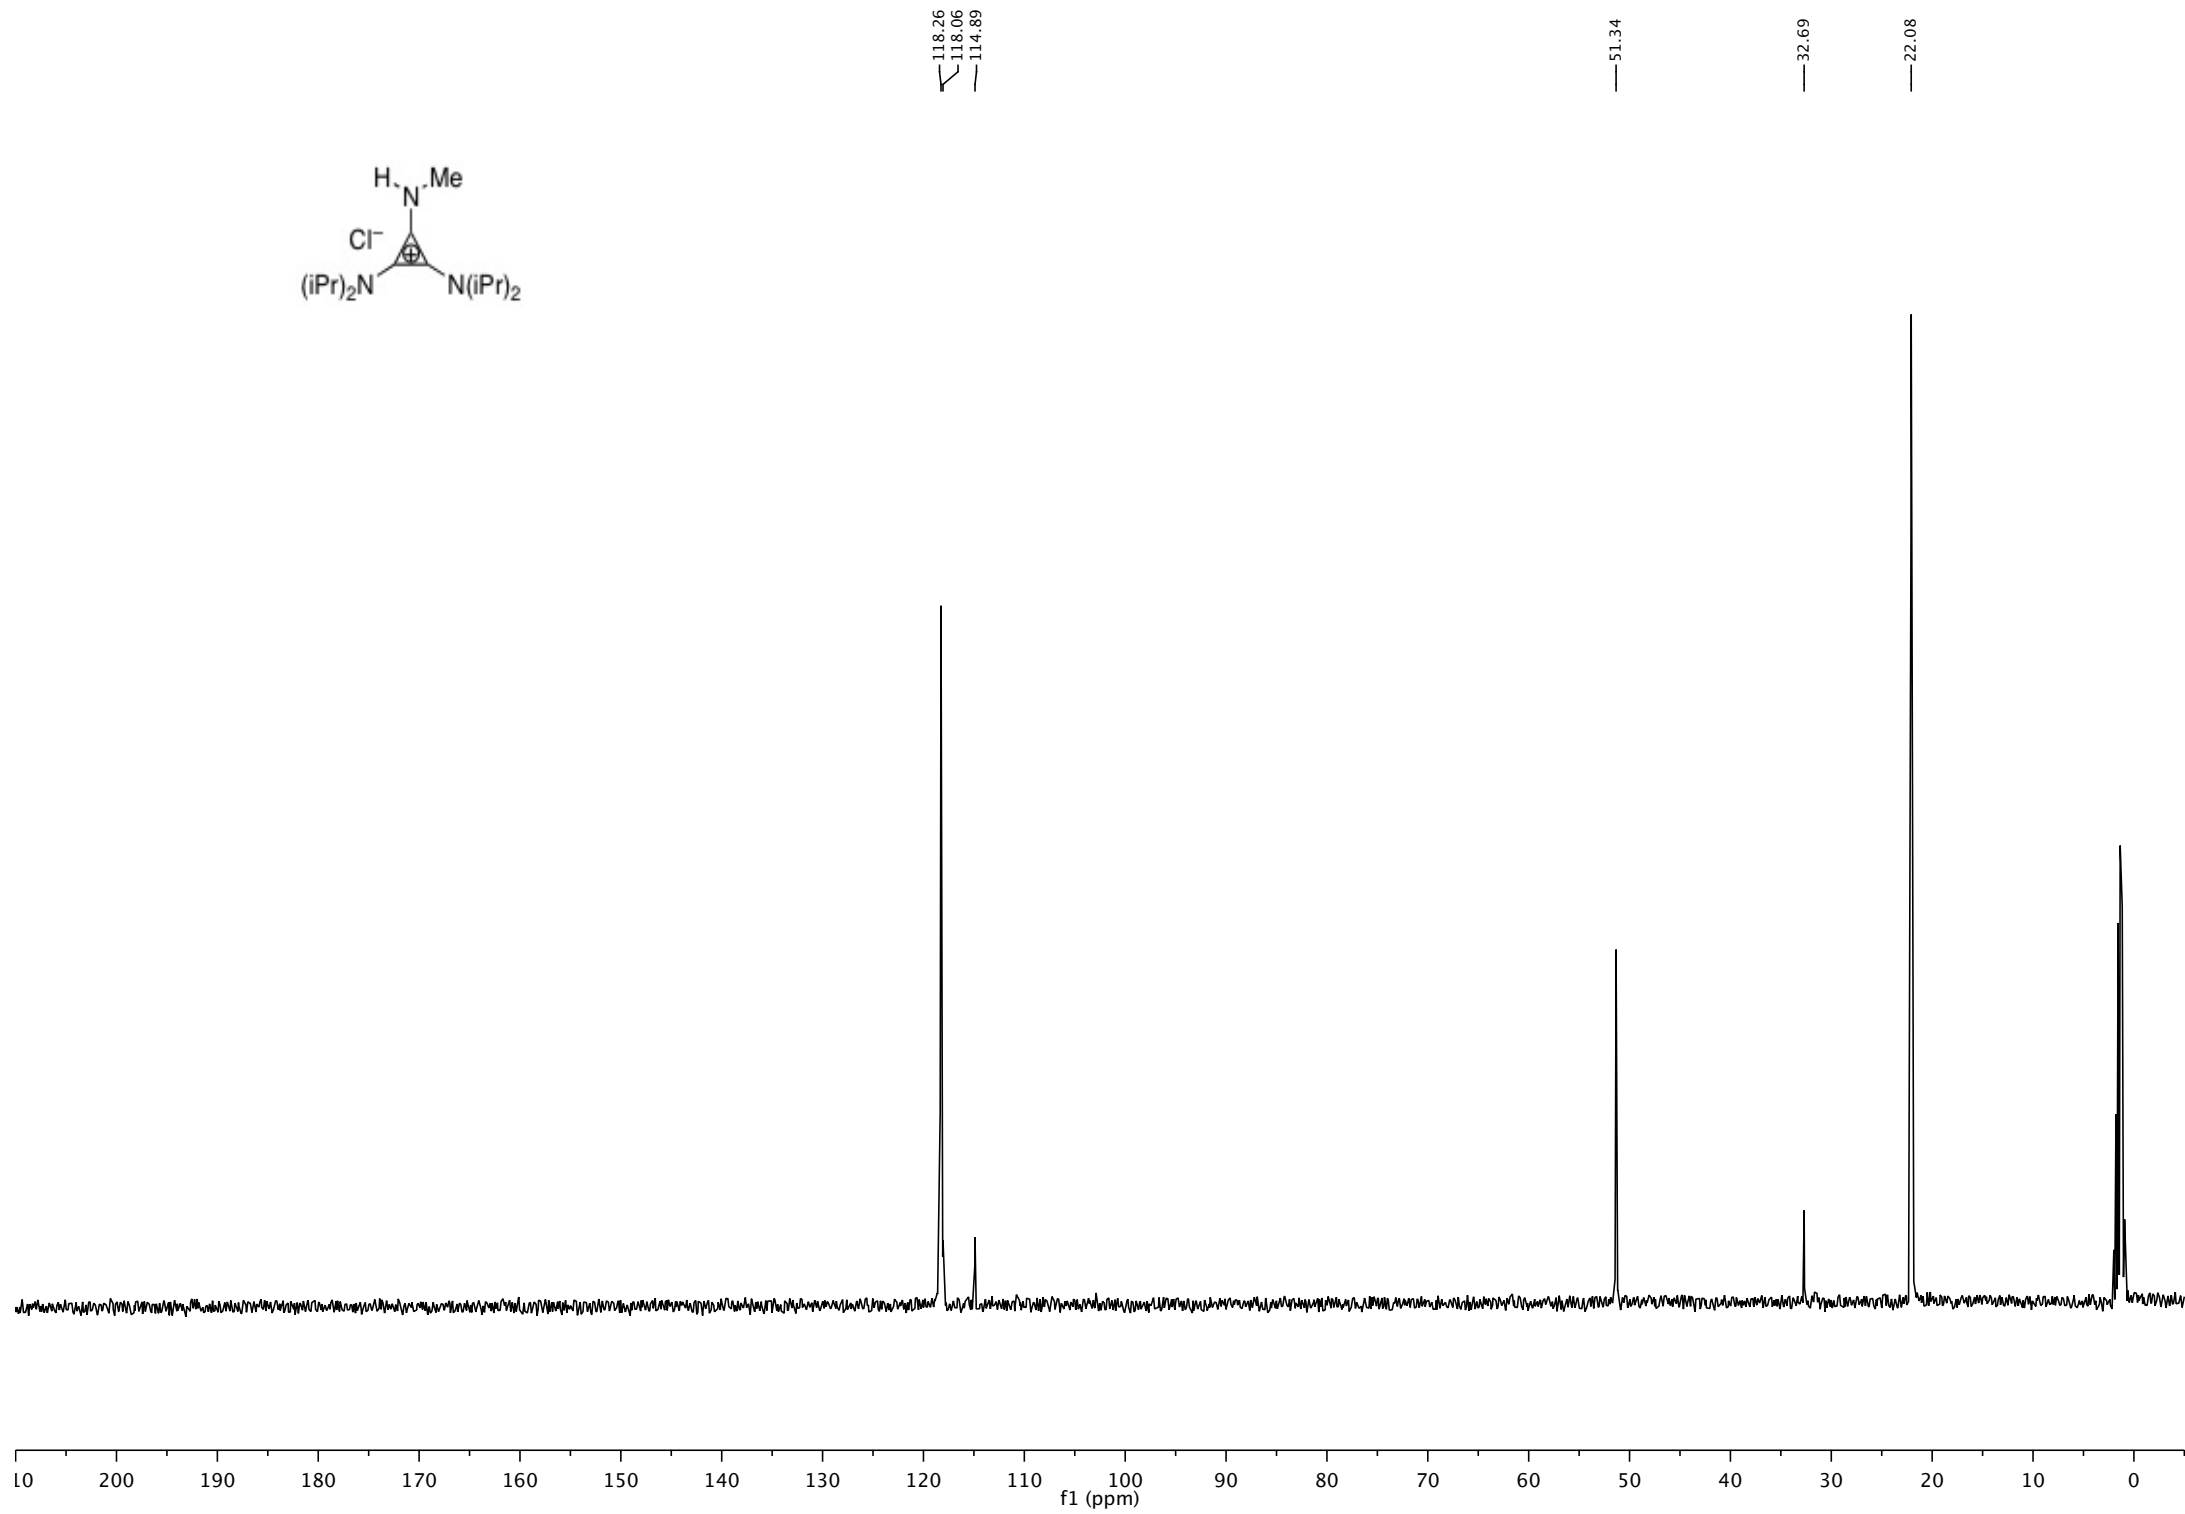

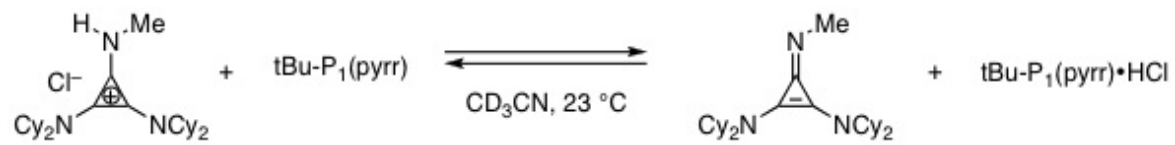

3.24  
3.20  
3.19  
3.05

1.94

1.27  
1.27

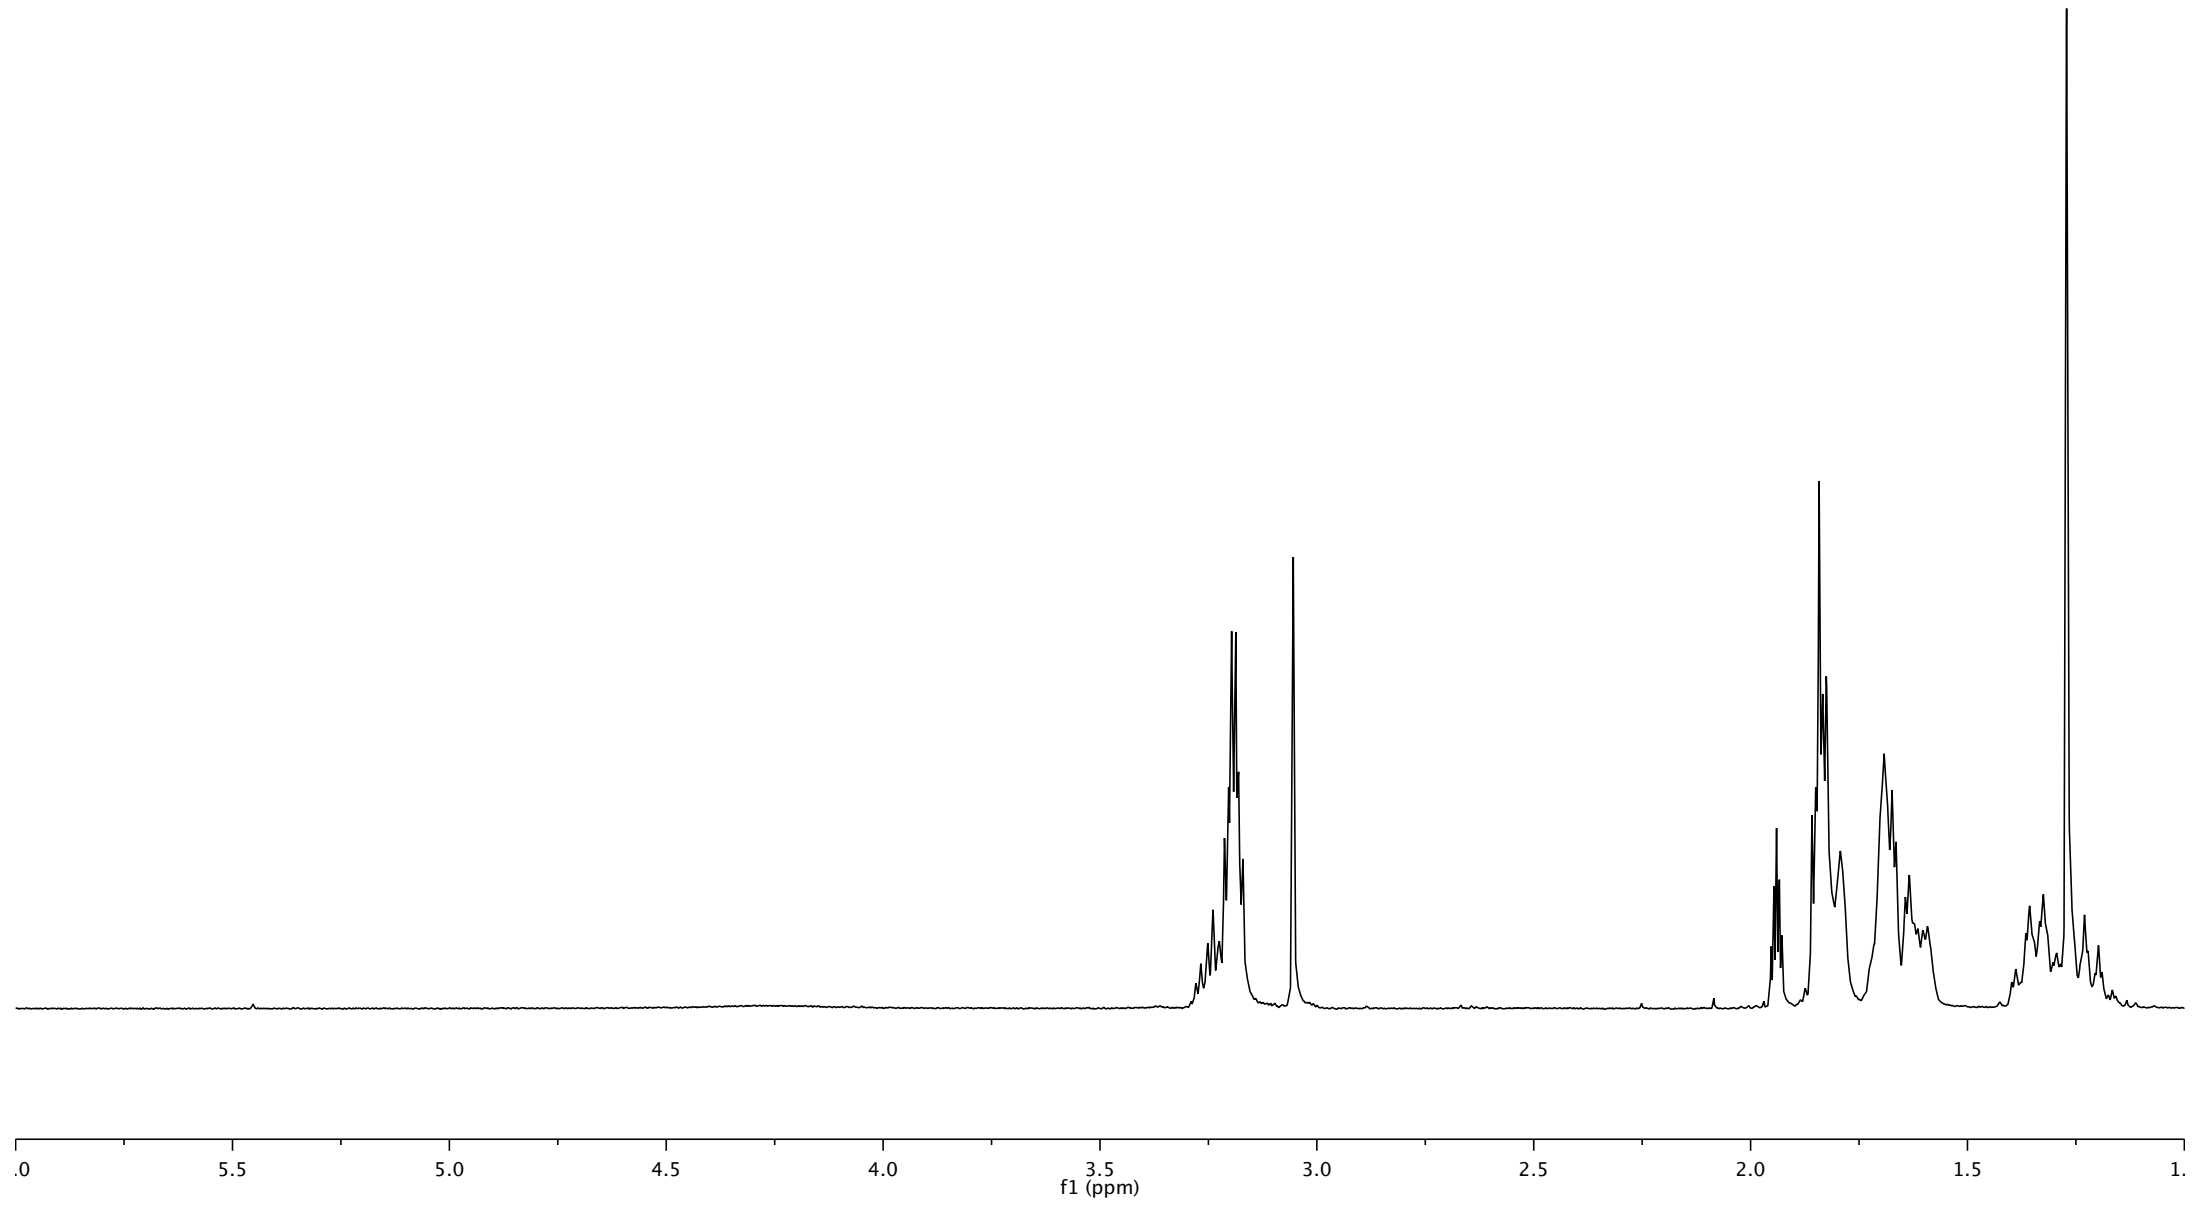

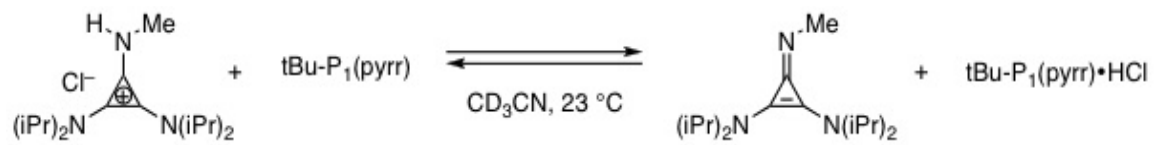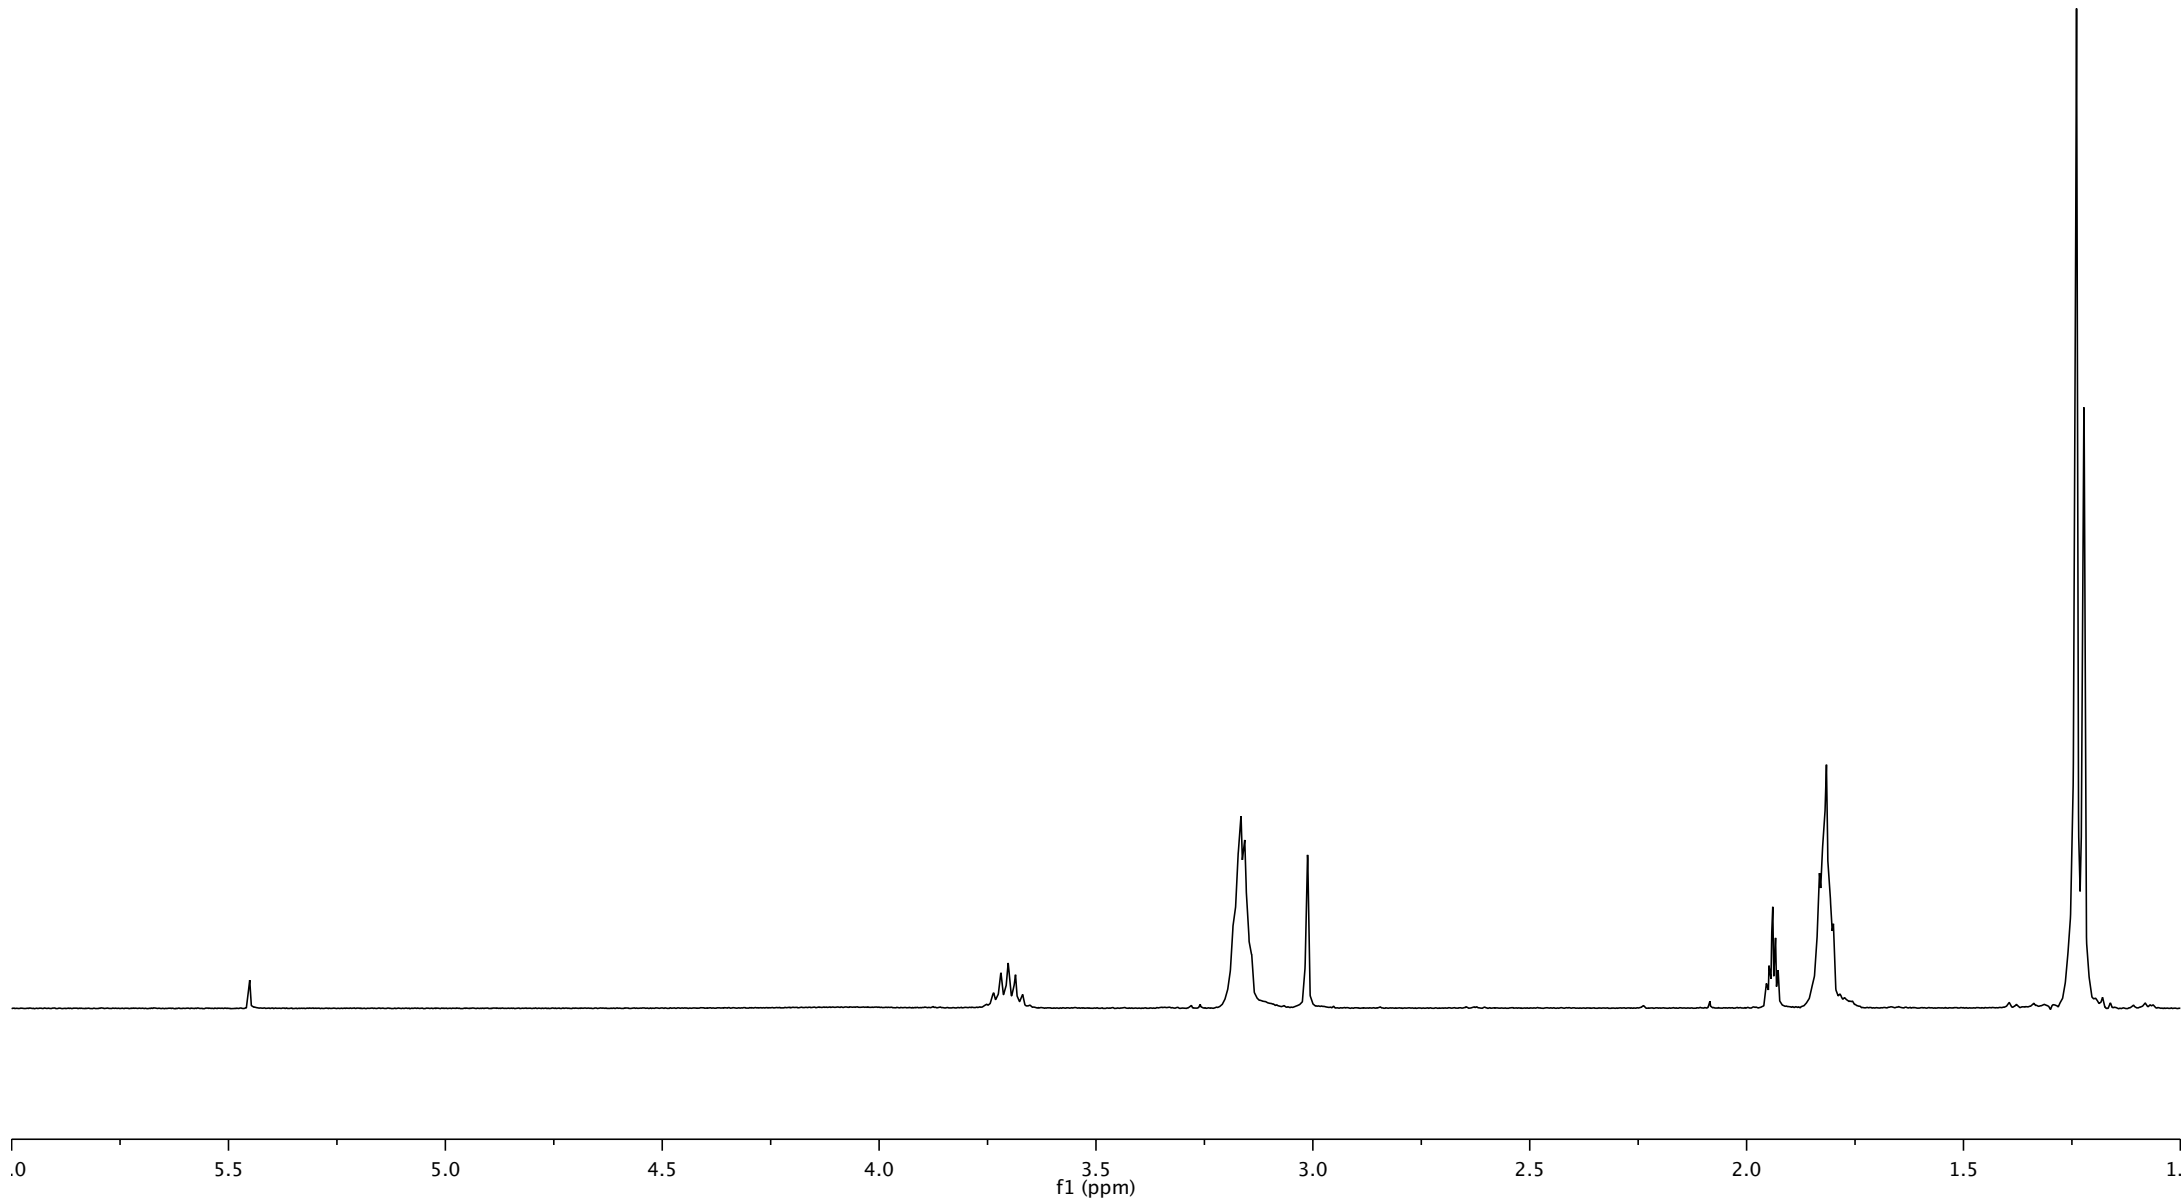

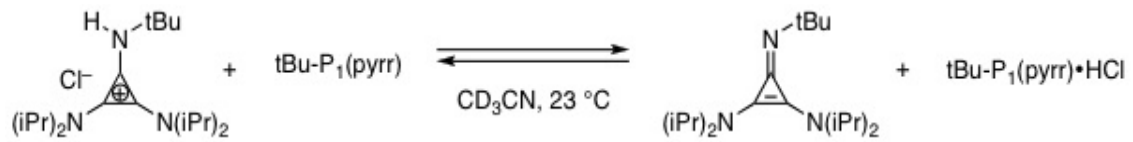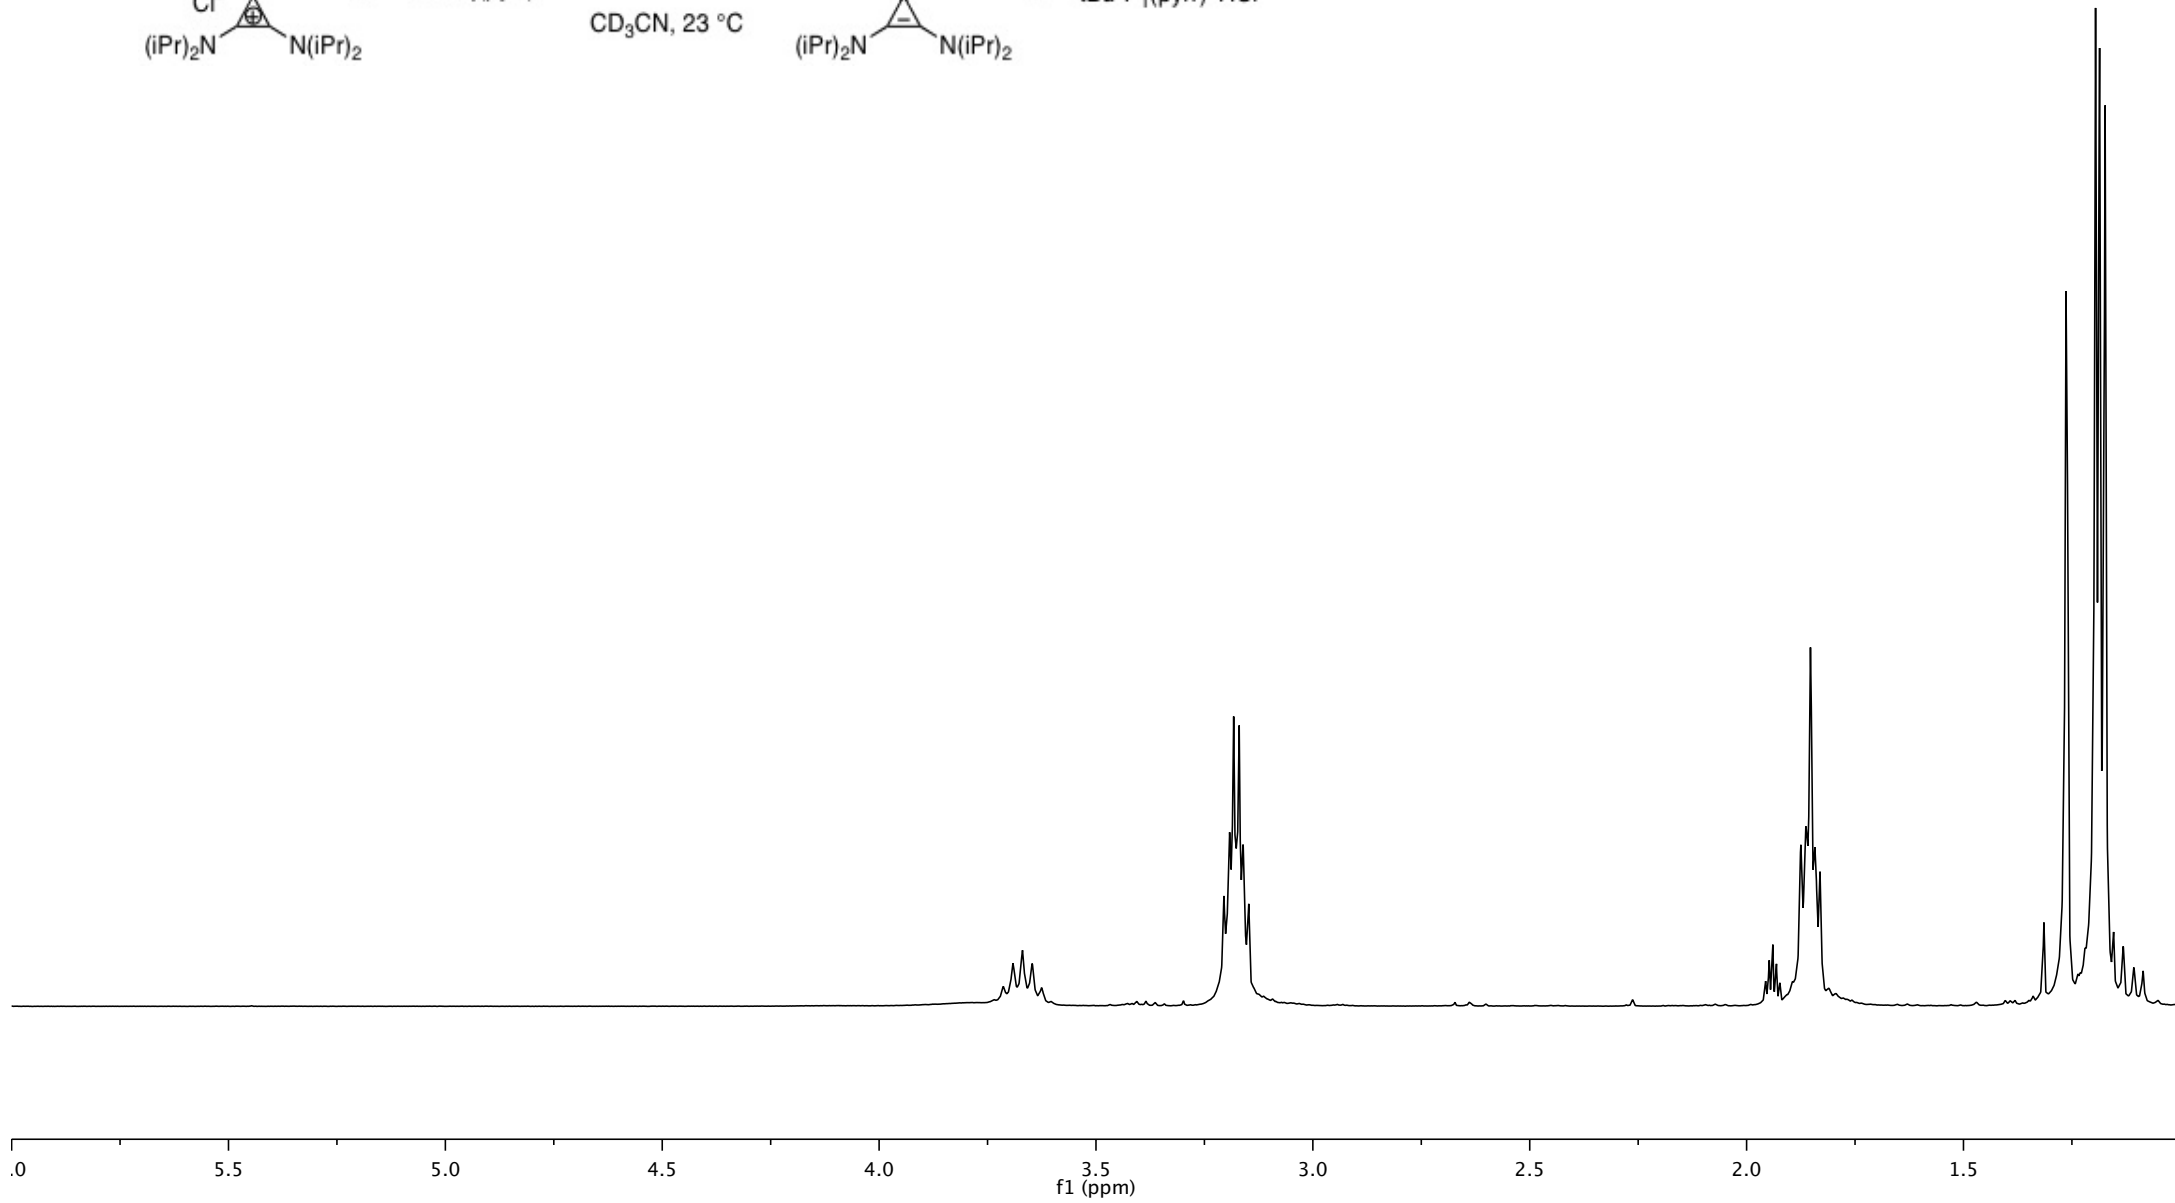

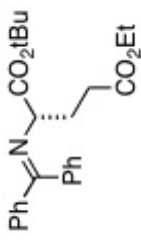

1.44  
1.21  
1.19  
1.17

2.21  
2.23  
2.33  
2.35  
2.35

3.95  
3.97  
3.97  
3.98  
4.02  
4.04  
4.06  
4.07

7.17  
7.17  
7.18  
7.18  
7.19  
7.32  
7.32  
7.33  
7.42  
7.43  
7.44  
7.44  
7.63  
7.64  
7.65  
7.65  
7.66

3.19  
9.76

2.12  
2.09

1.00  
2.05

2.12  
6.30  
2.09

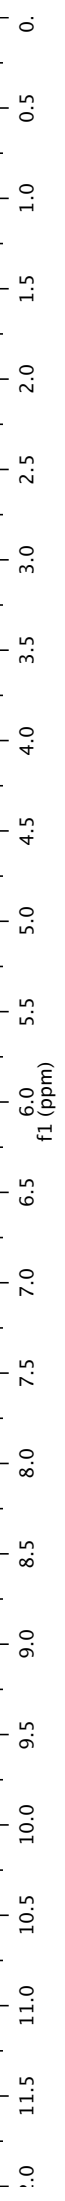

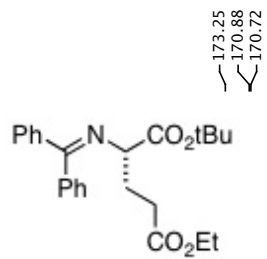

173.25  
170.88  
170.72

139.60  
136.61  
130.40  
128.91  
128.68  
128.55  
128.10  
127.91

81.25  
77.48  
77.16  
76.84

64.99  
60.40

30.90  
28.79  
28.17

14.28

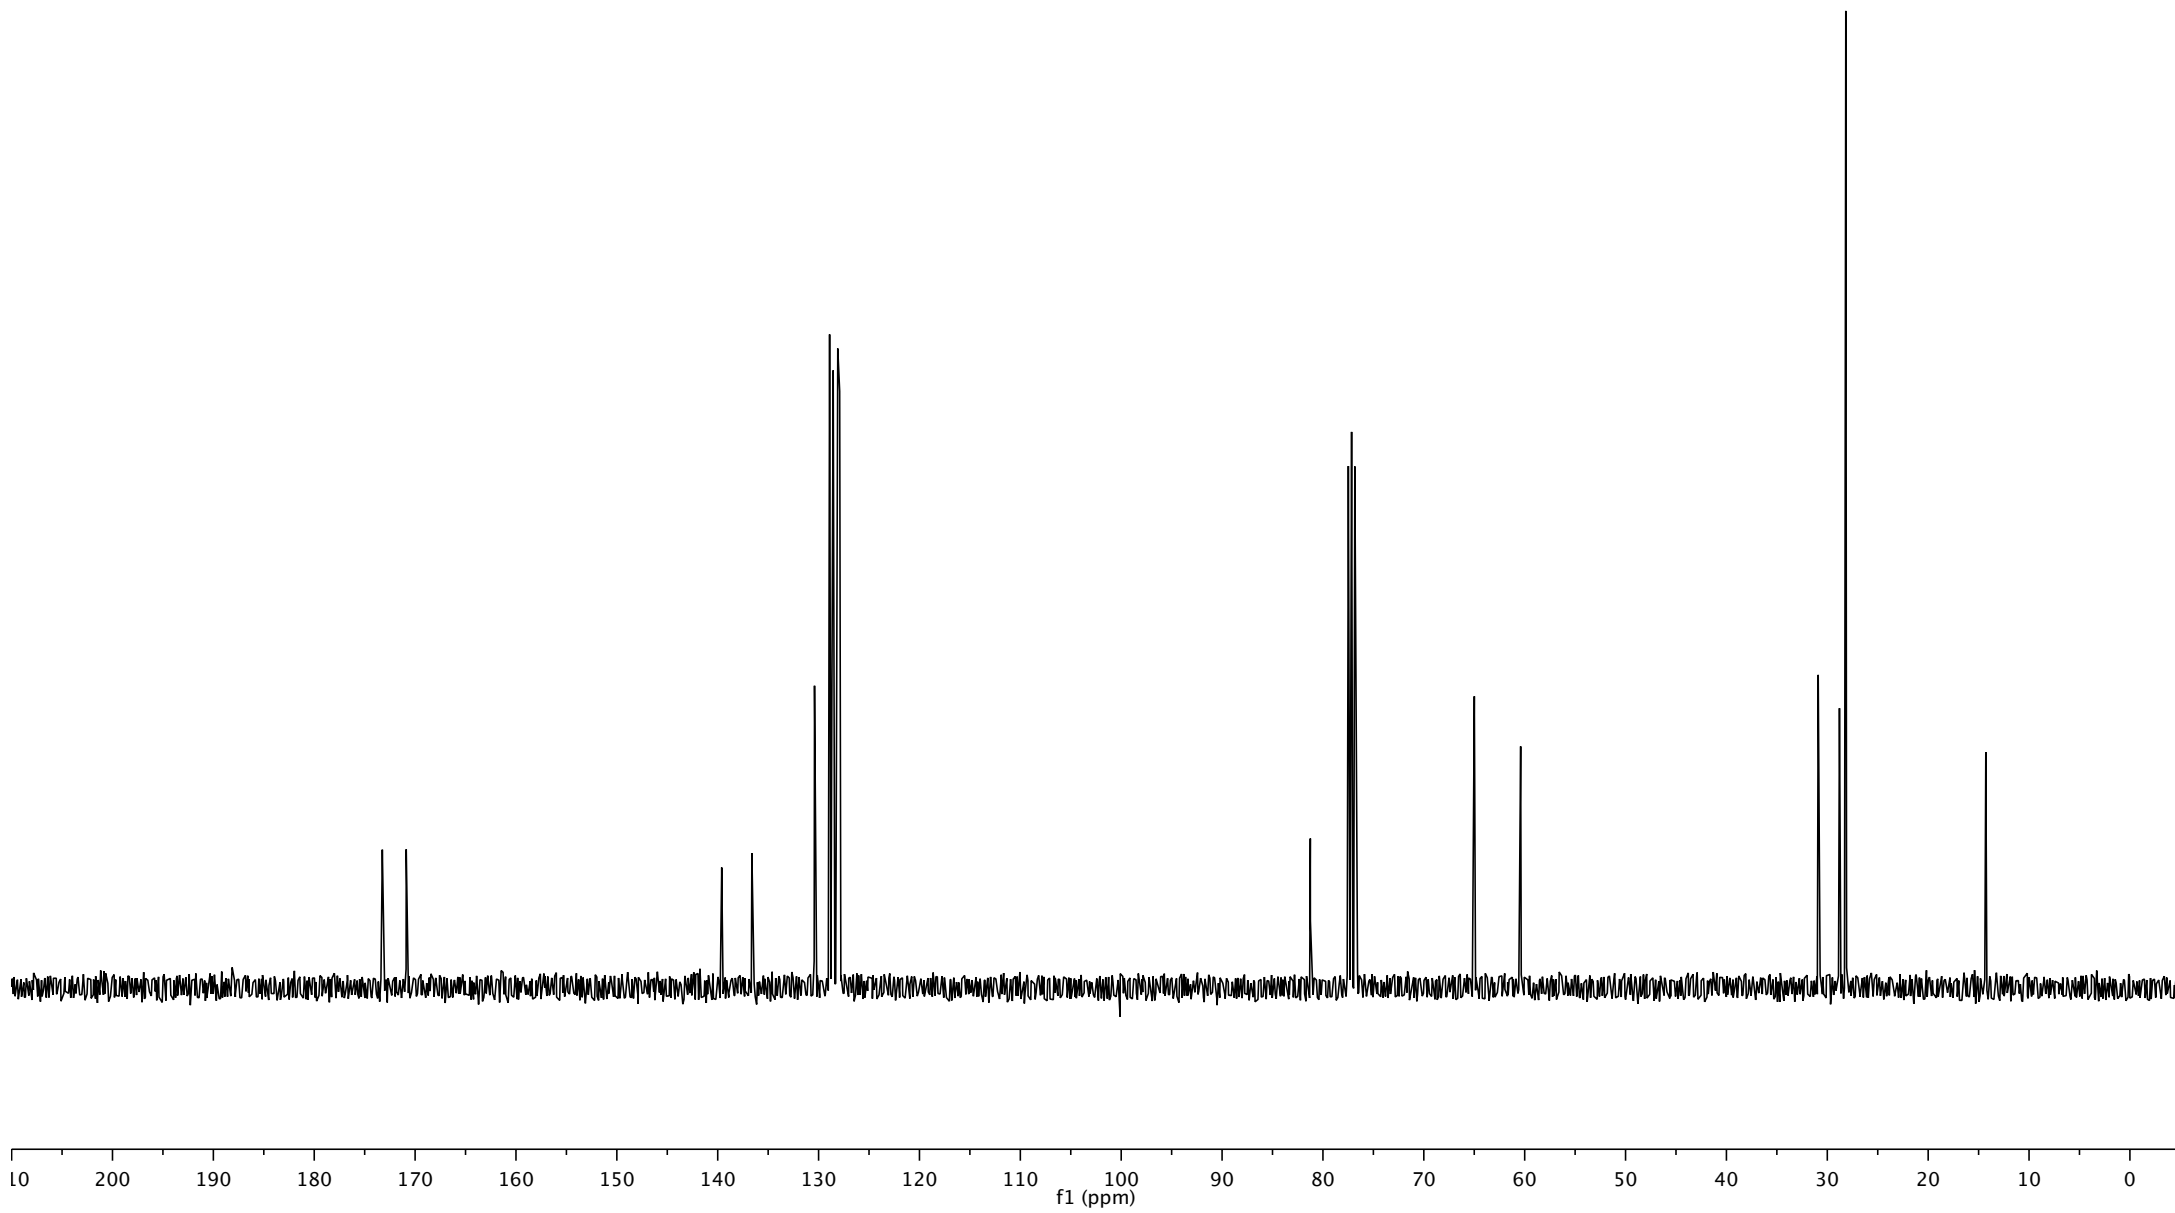

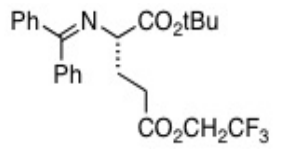

7.65  
7.65  
7.63  
7.63  
7.45  
7.44  
7.43  
7.43  
7.34  
7.33  
7.32  
7.19  
7.18  
7.18  
7.17  
7.16

4.36  
4.35  
4.34  
4.33  
4.00  
3.99  
3.98  
3.97

2.51  
2.49  
2.26  
2.25  
2.24  
2.22

1.44

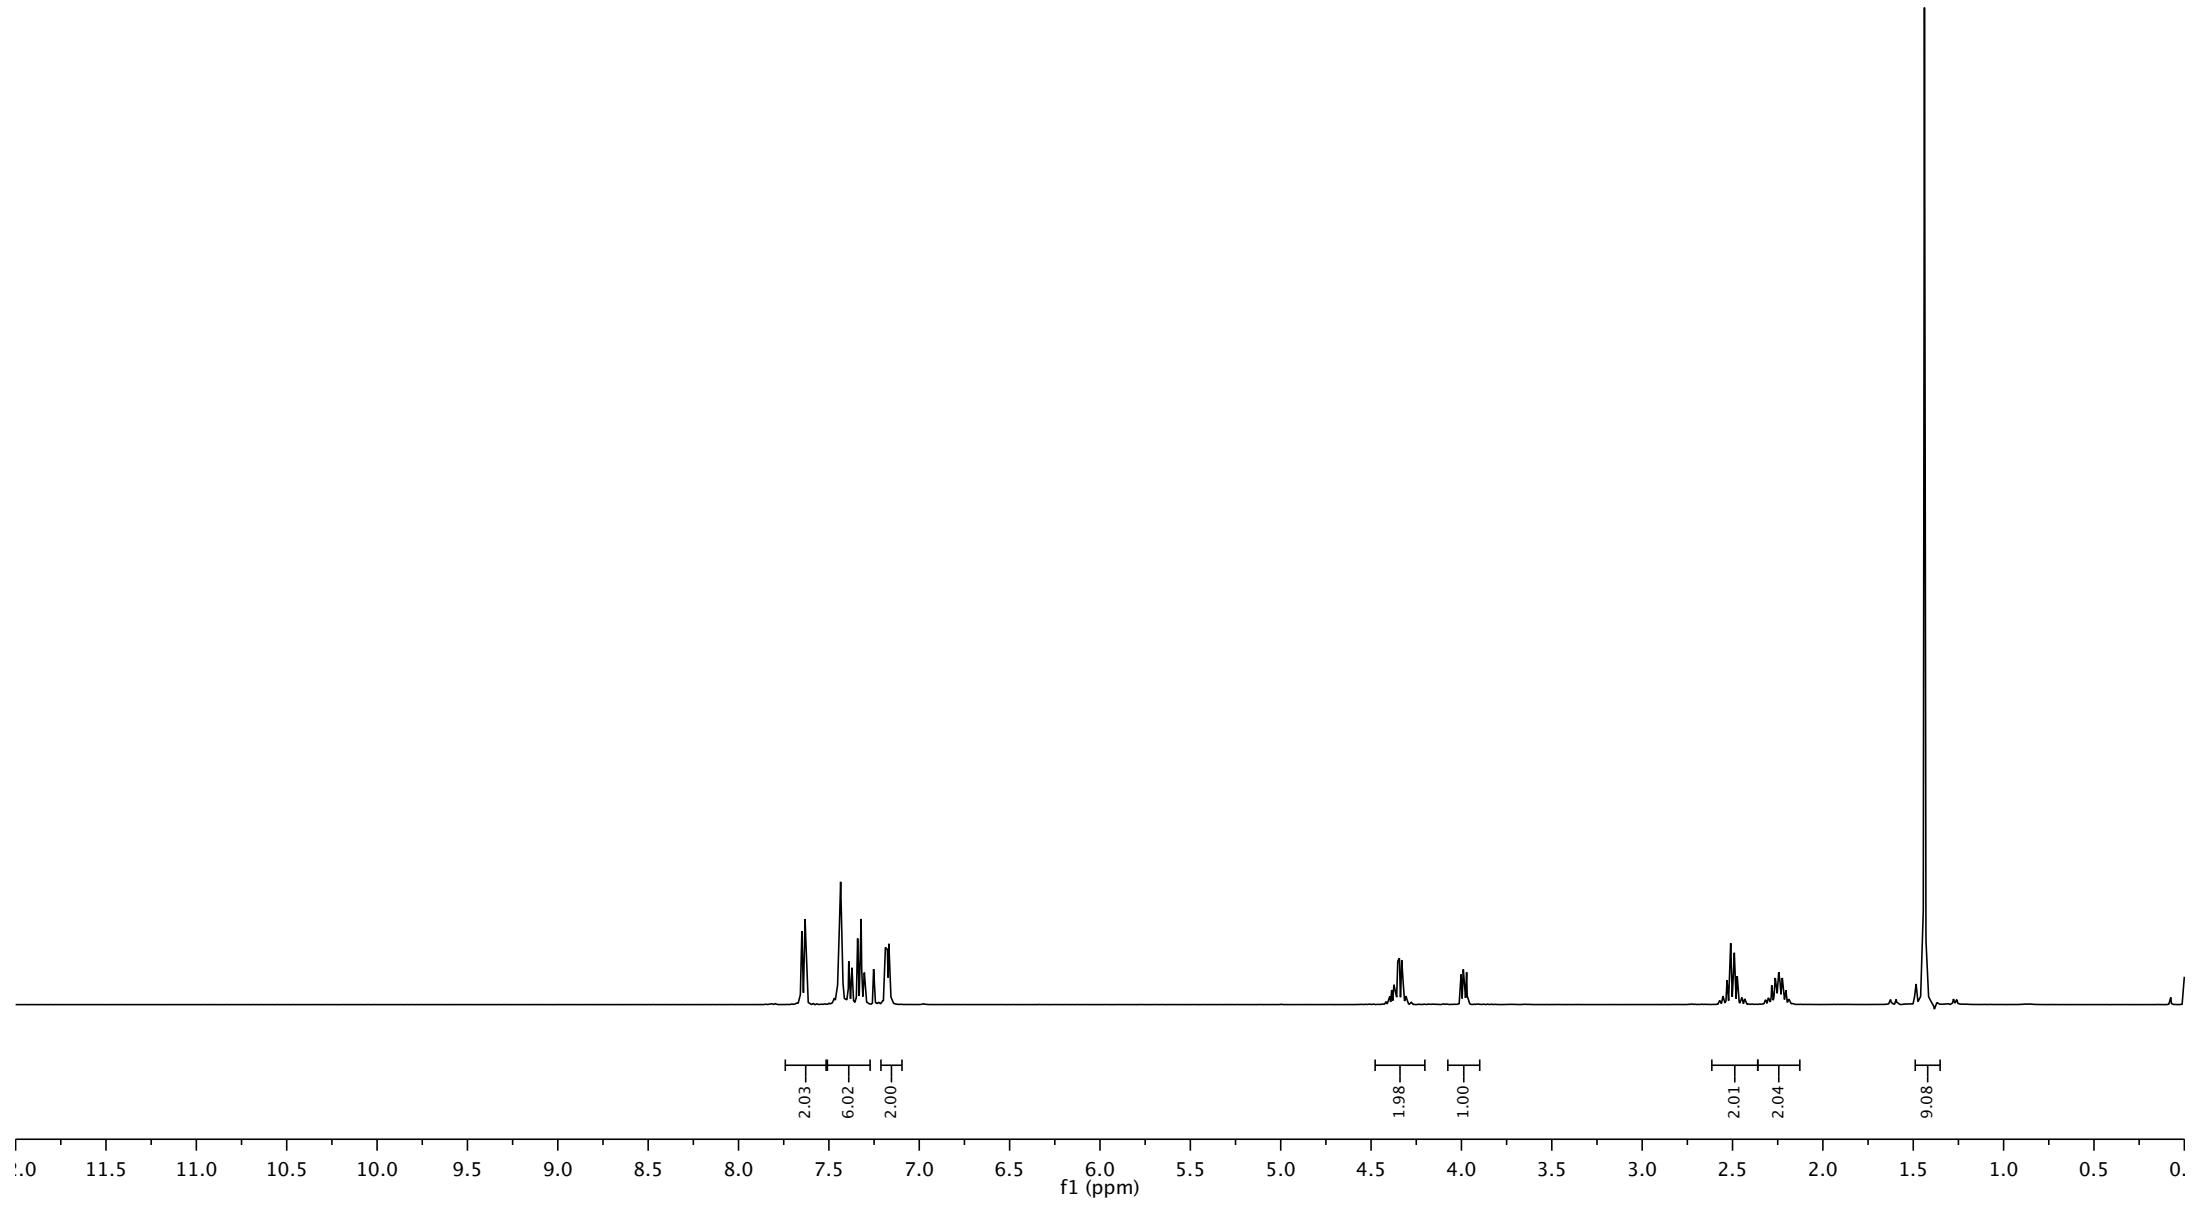

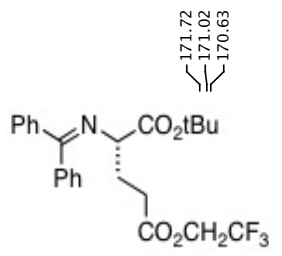

171.72  
171.02  
170.63

139.46  
136.48  
130.56  
128.91  
128.78  
128.63  
128.17  
127.85

81.48  
77.42  
77.16  
76.91

64.65  
60.54  
60.25

30.21  
28.48  
28.16

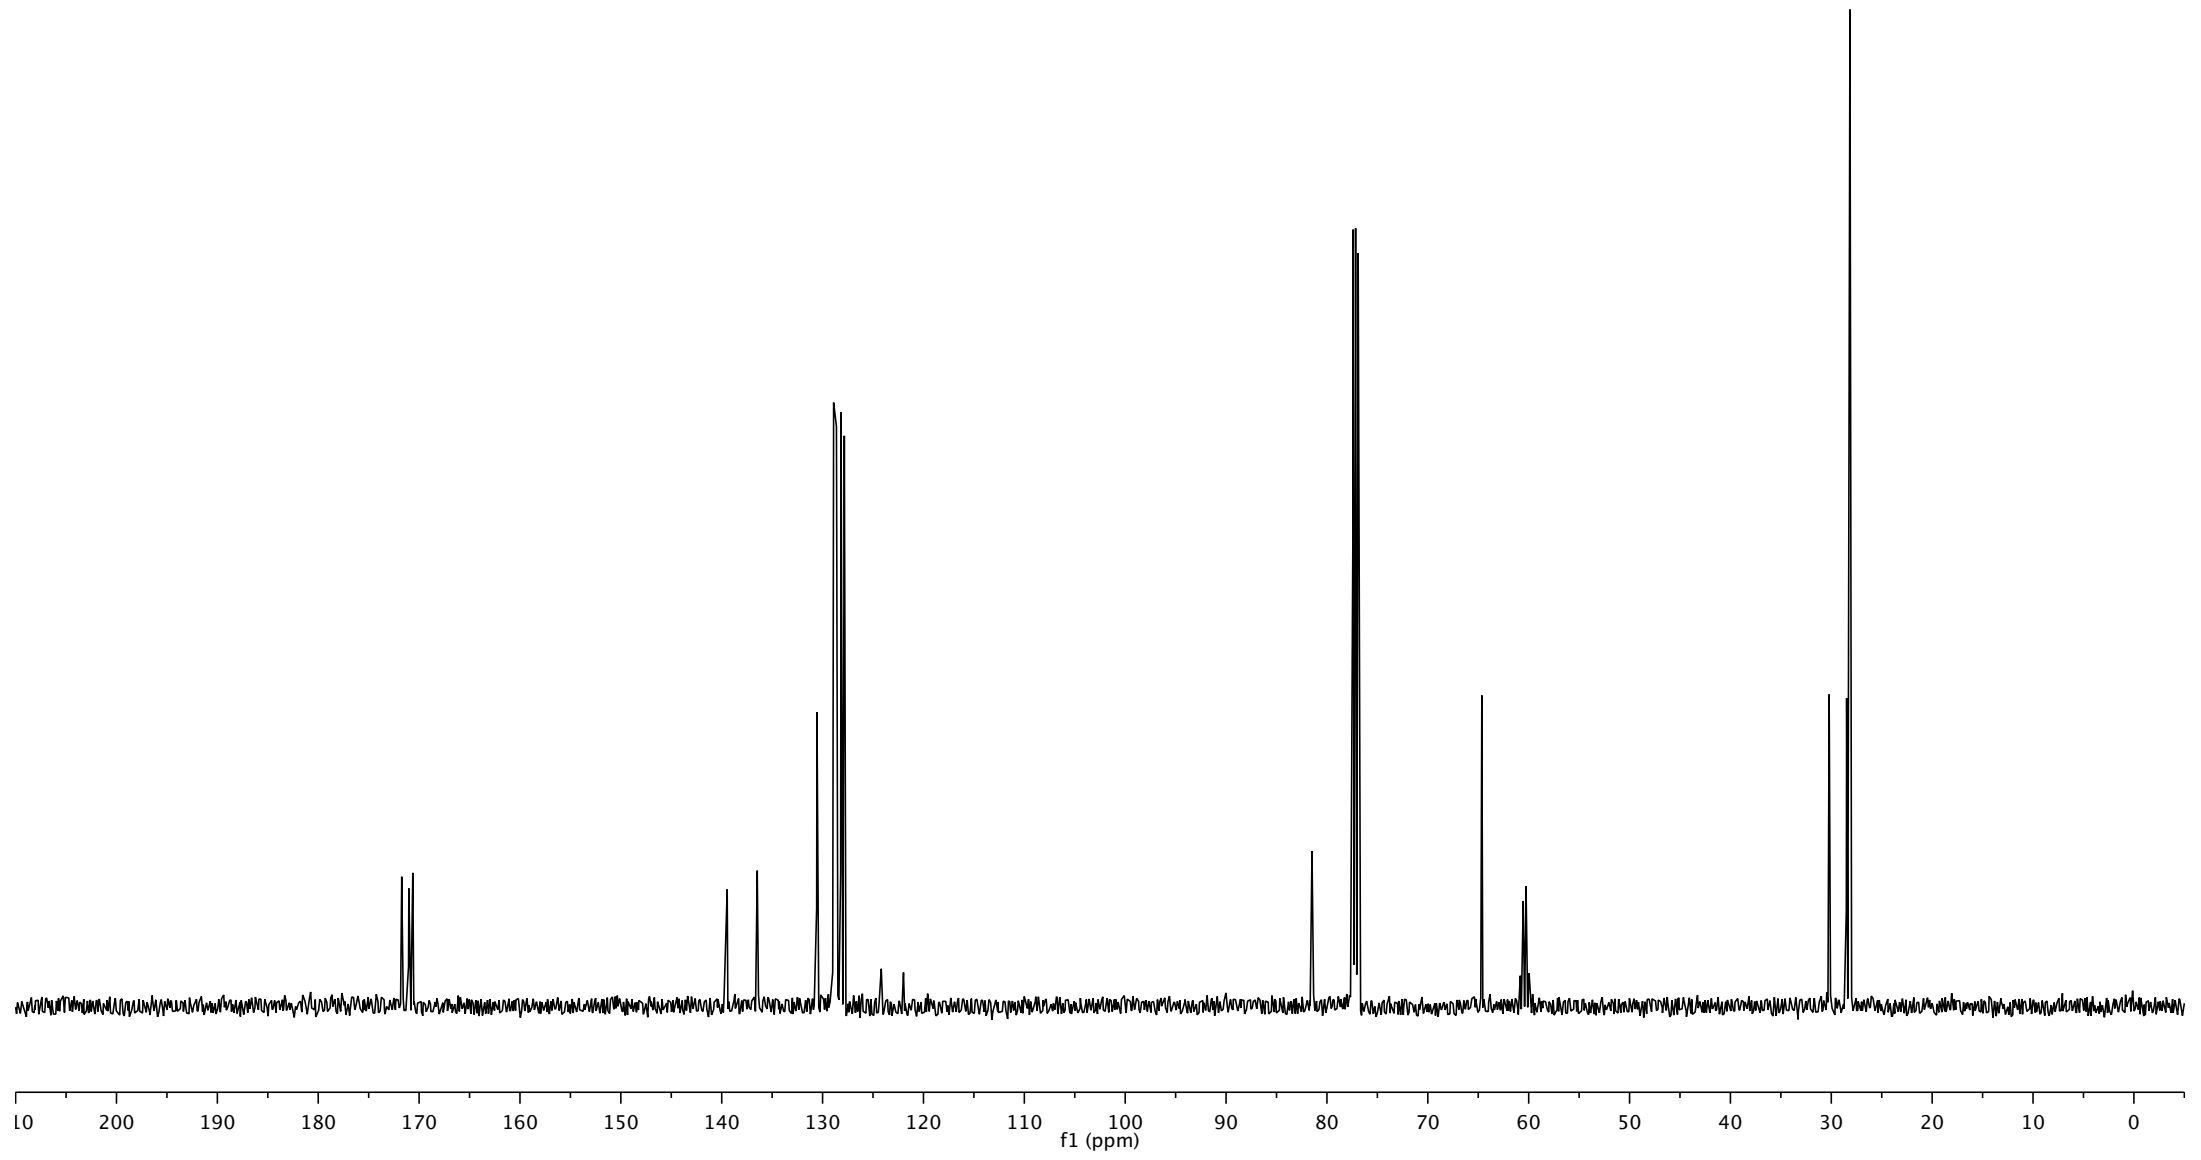



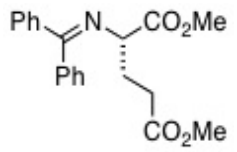

7.65  
7.65  
7.63  
7.63  
7.46  
7.45  
7.45  
7.44  
7.44  
7.34  
7.33  
7.32  
7.19  
7.19  
7.17  
7.17

4.15  
4.13  
4.11

3.71  
3.58

2.37  
2.35  
2.26  
2.24

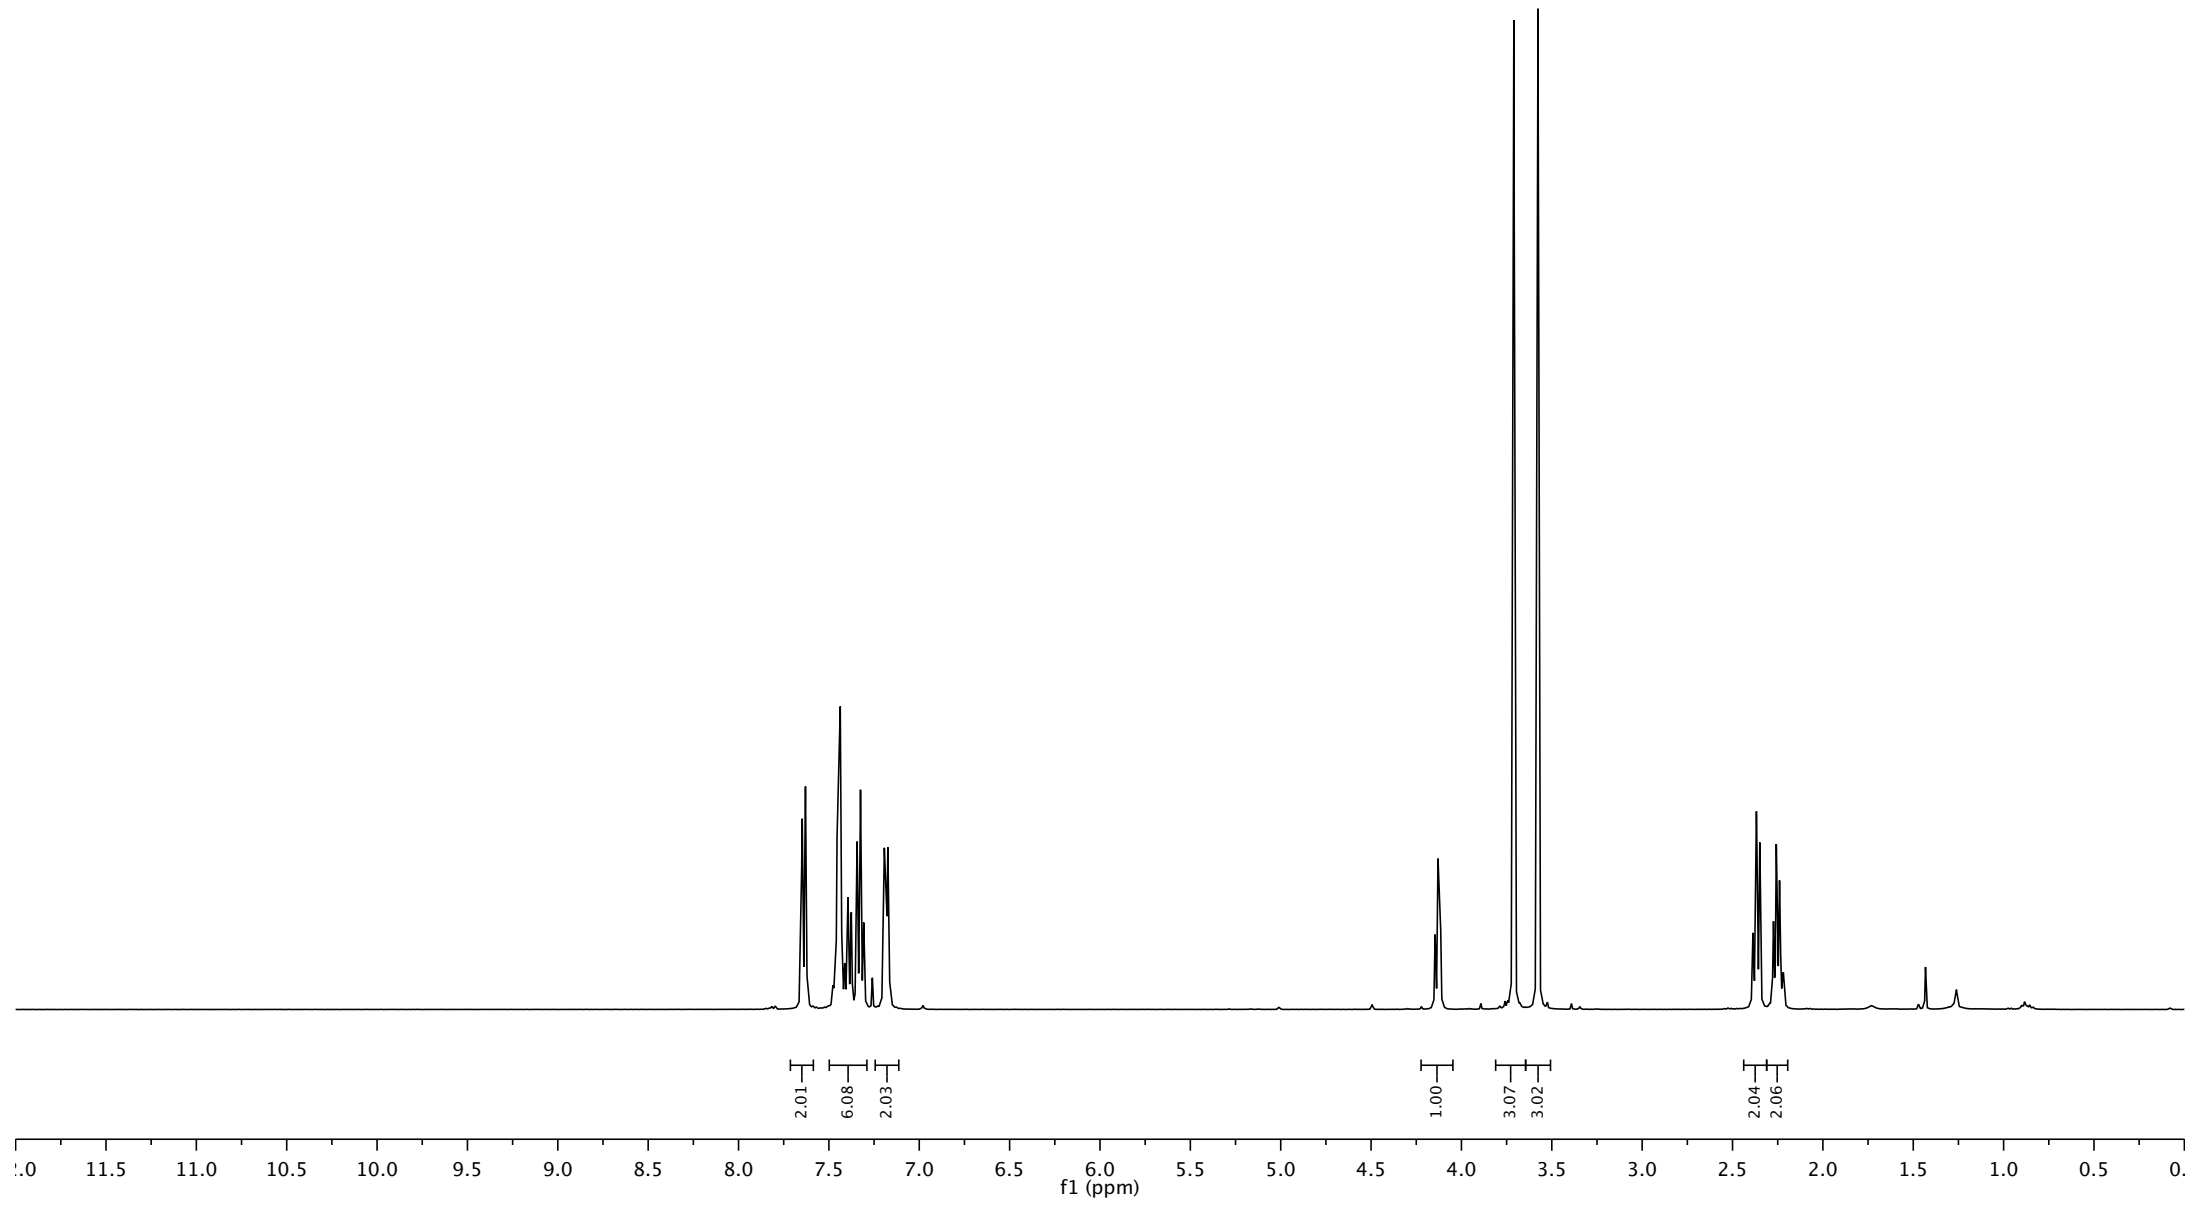

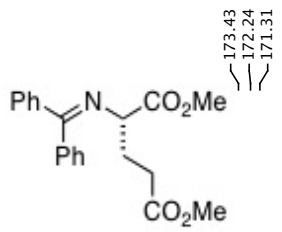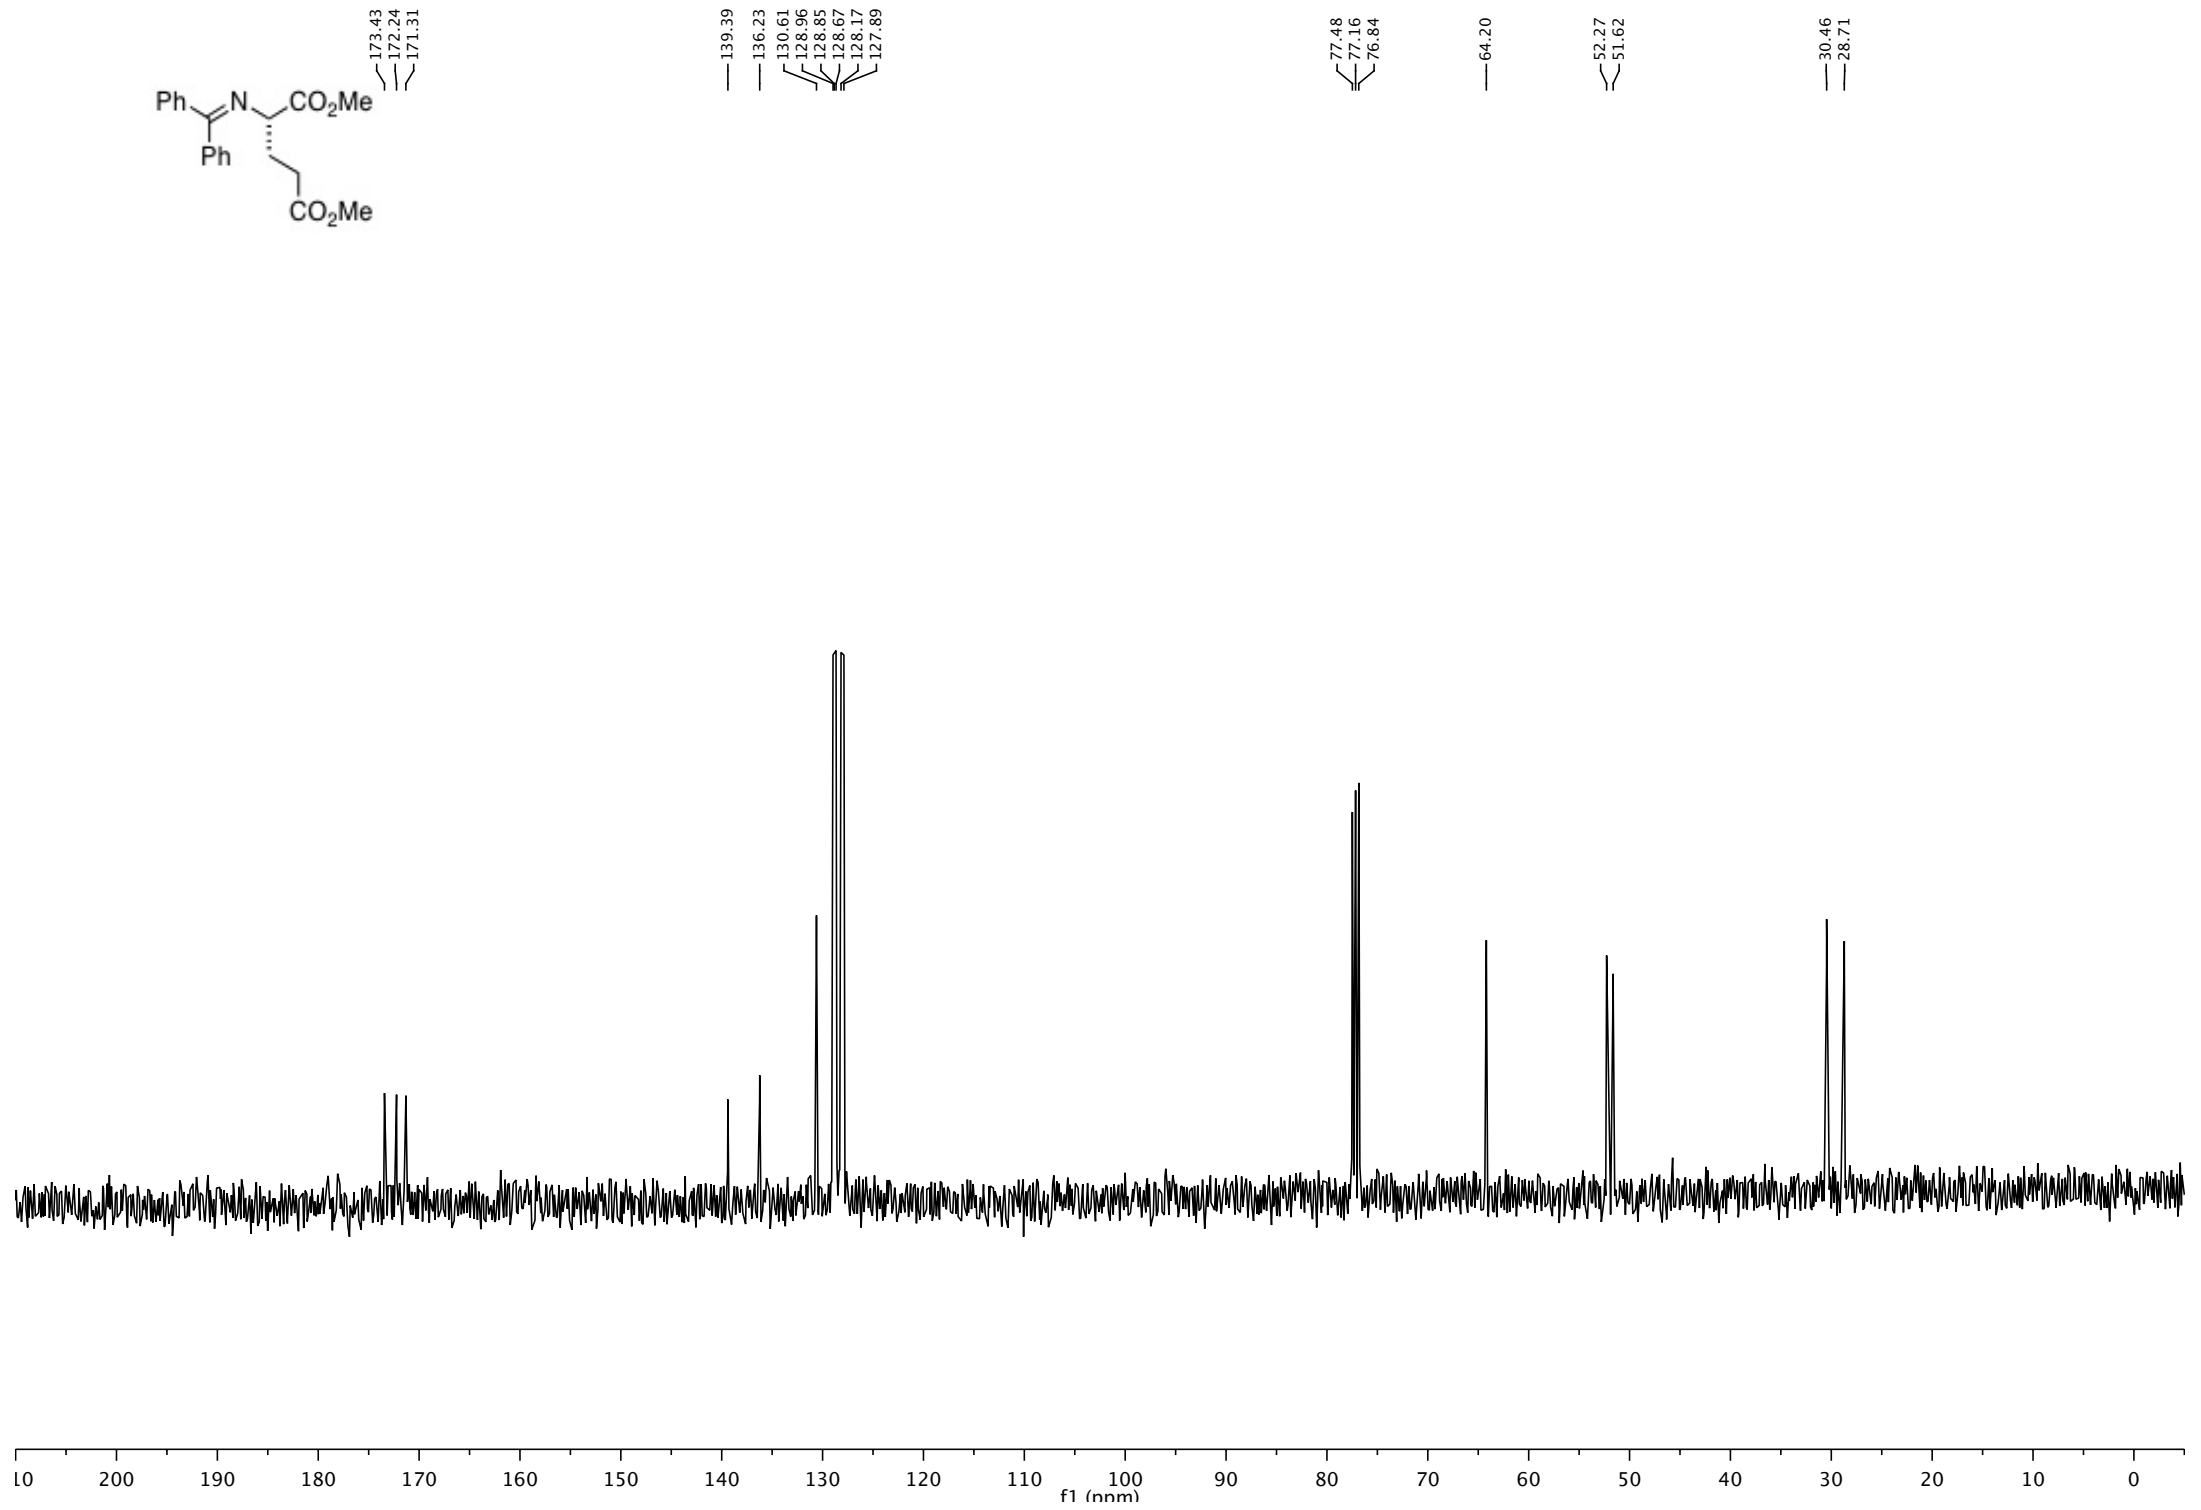

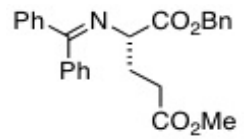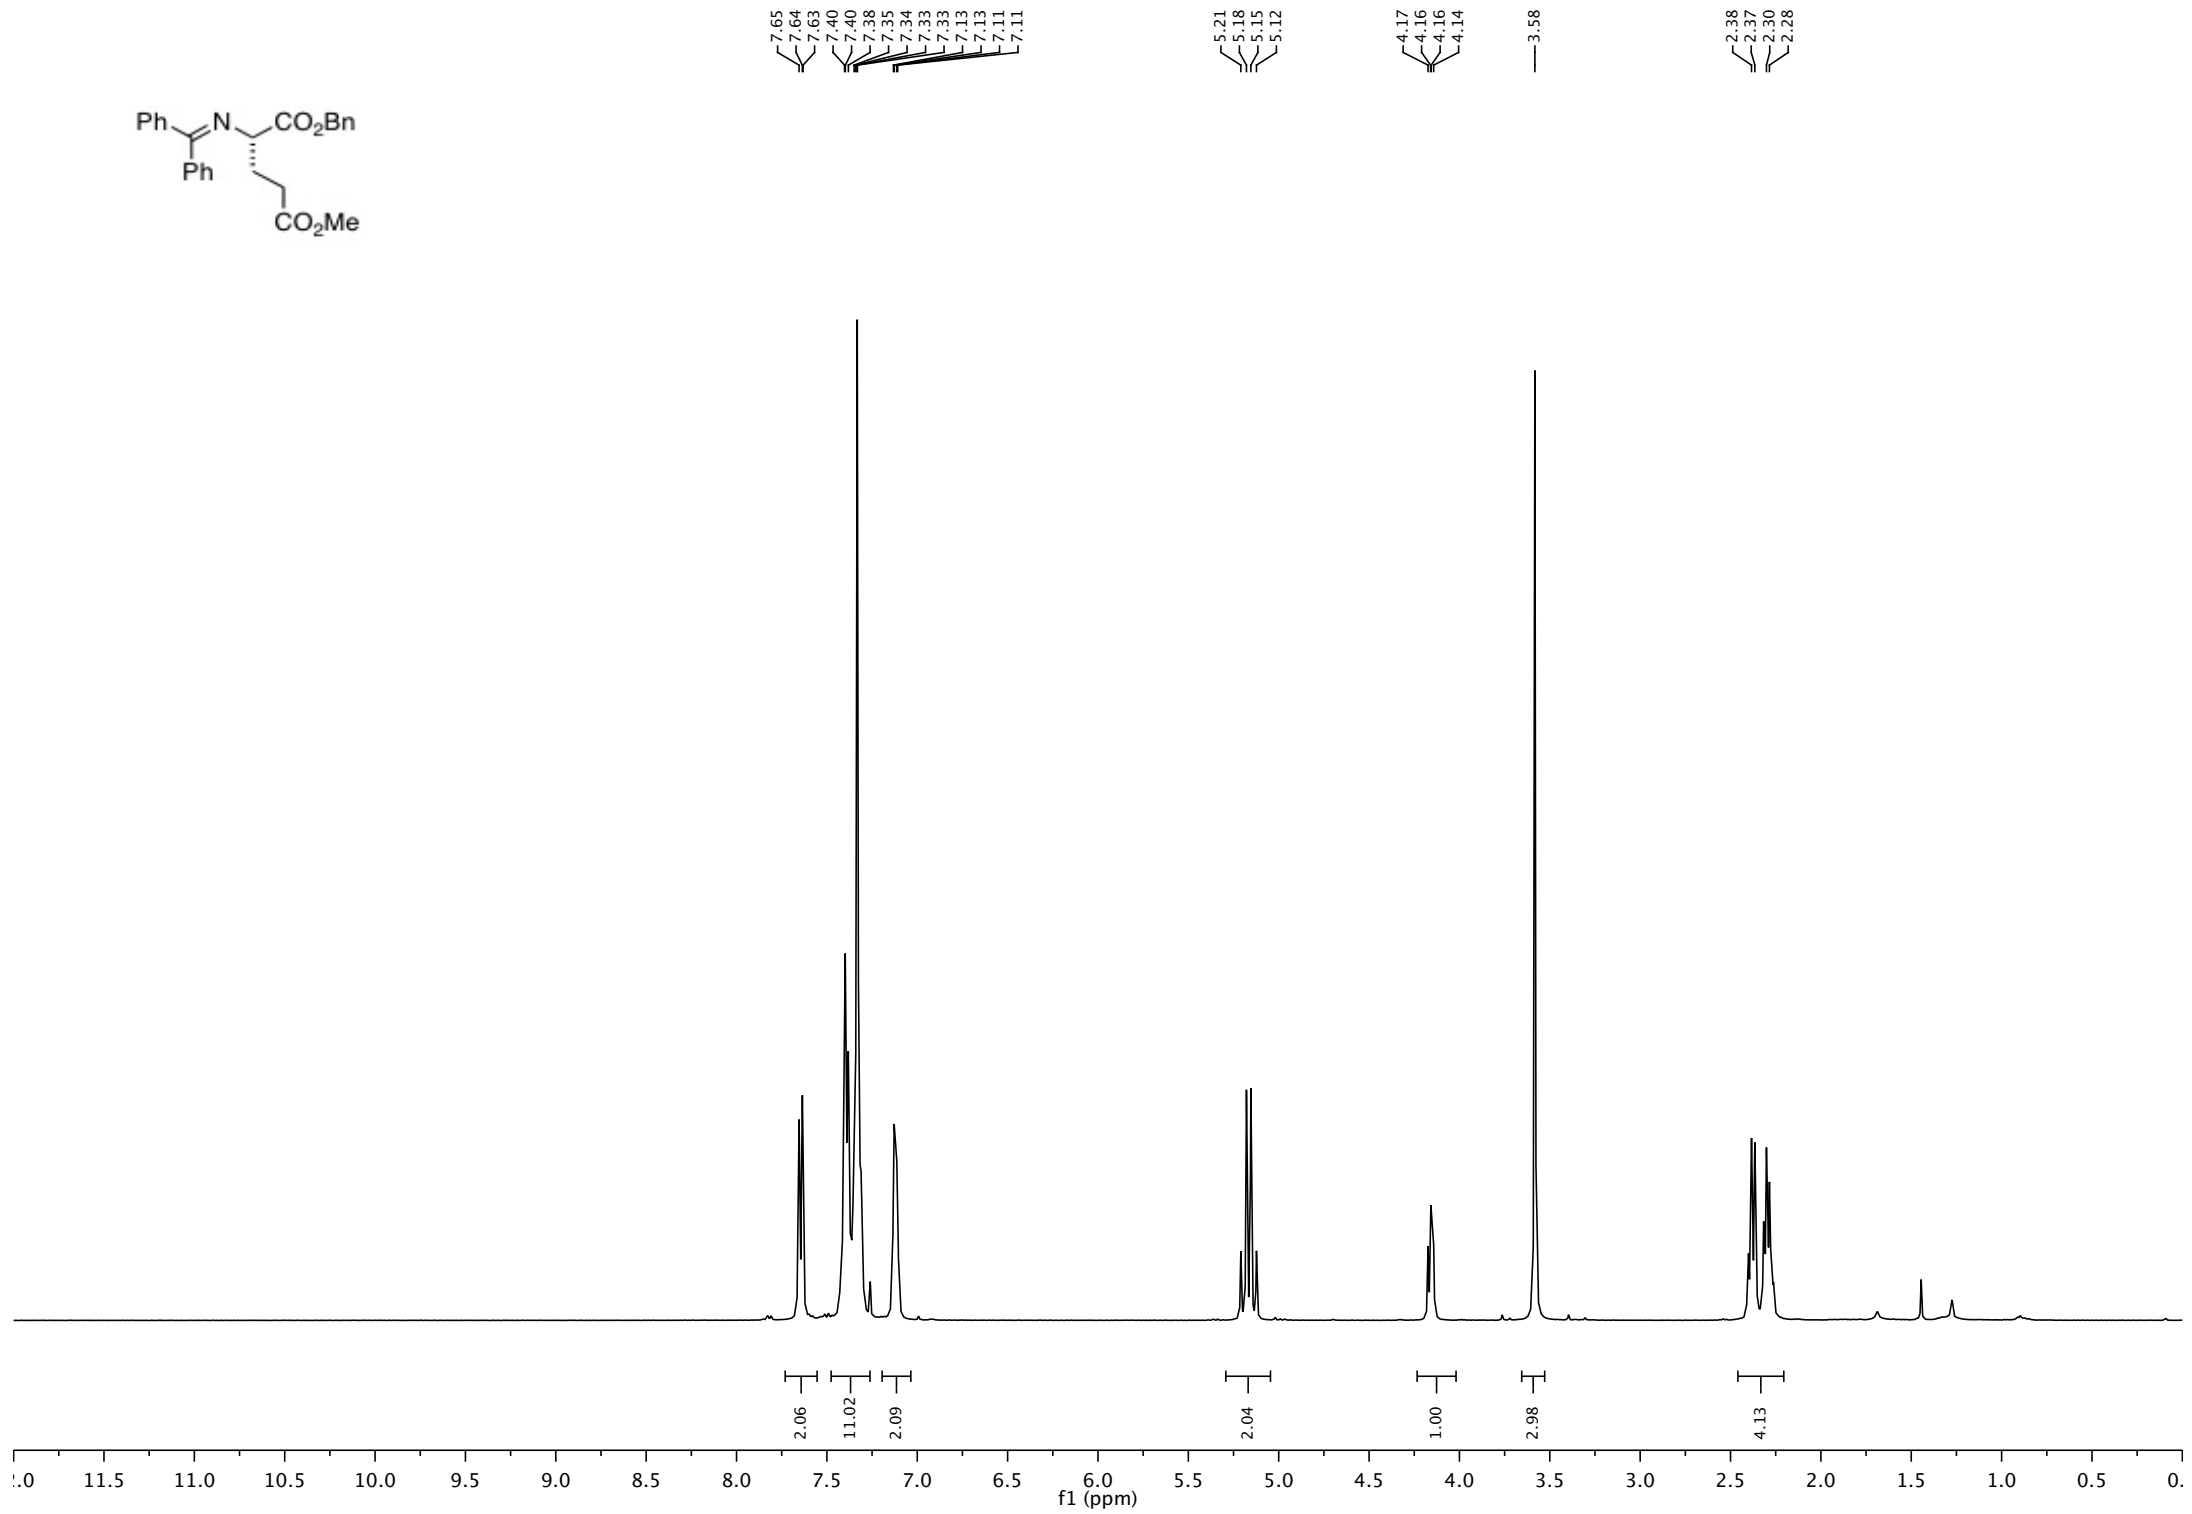

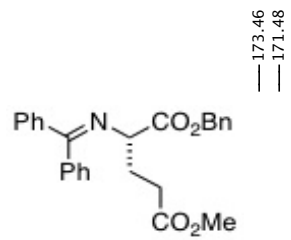

173.46  
171.48

139.36  
136.23  
135.92  
130.60  
128.96  
128.61  
128.30  
128.22  
128.16  
127.87

77.48  
77.16  
76.84

66.70  
64.26

51.63

30.48  
28.63

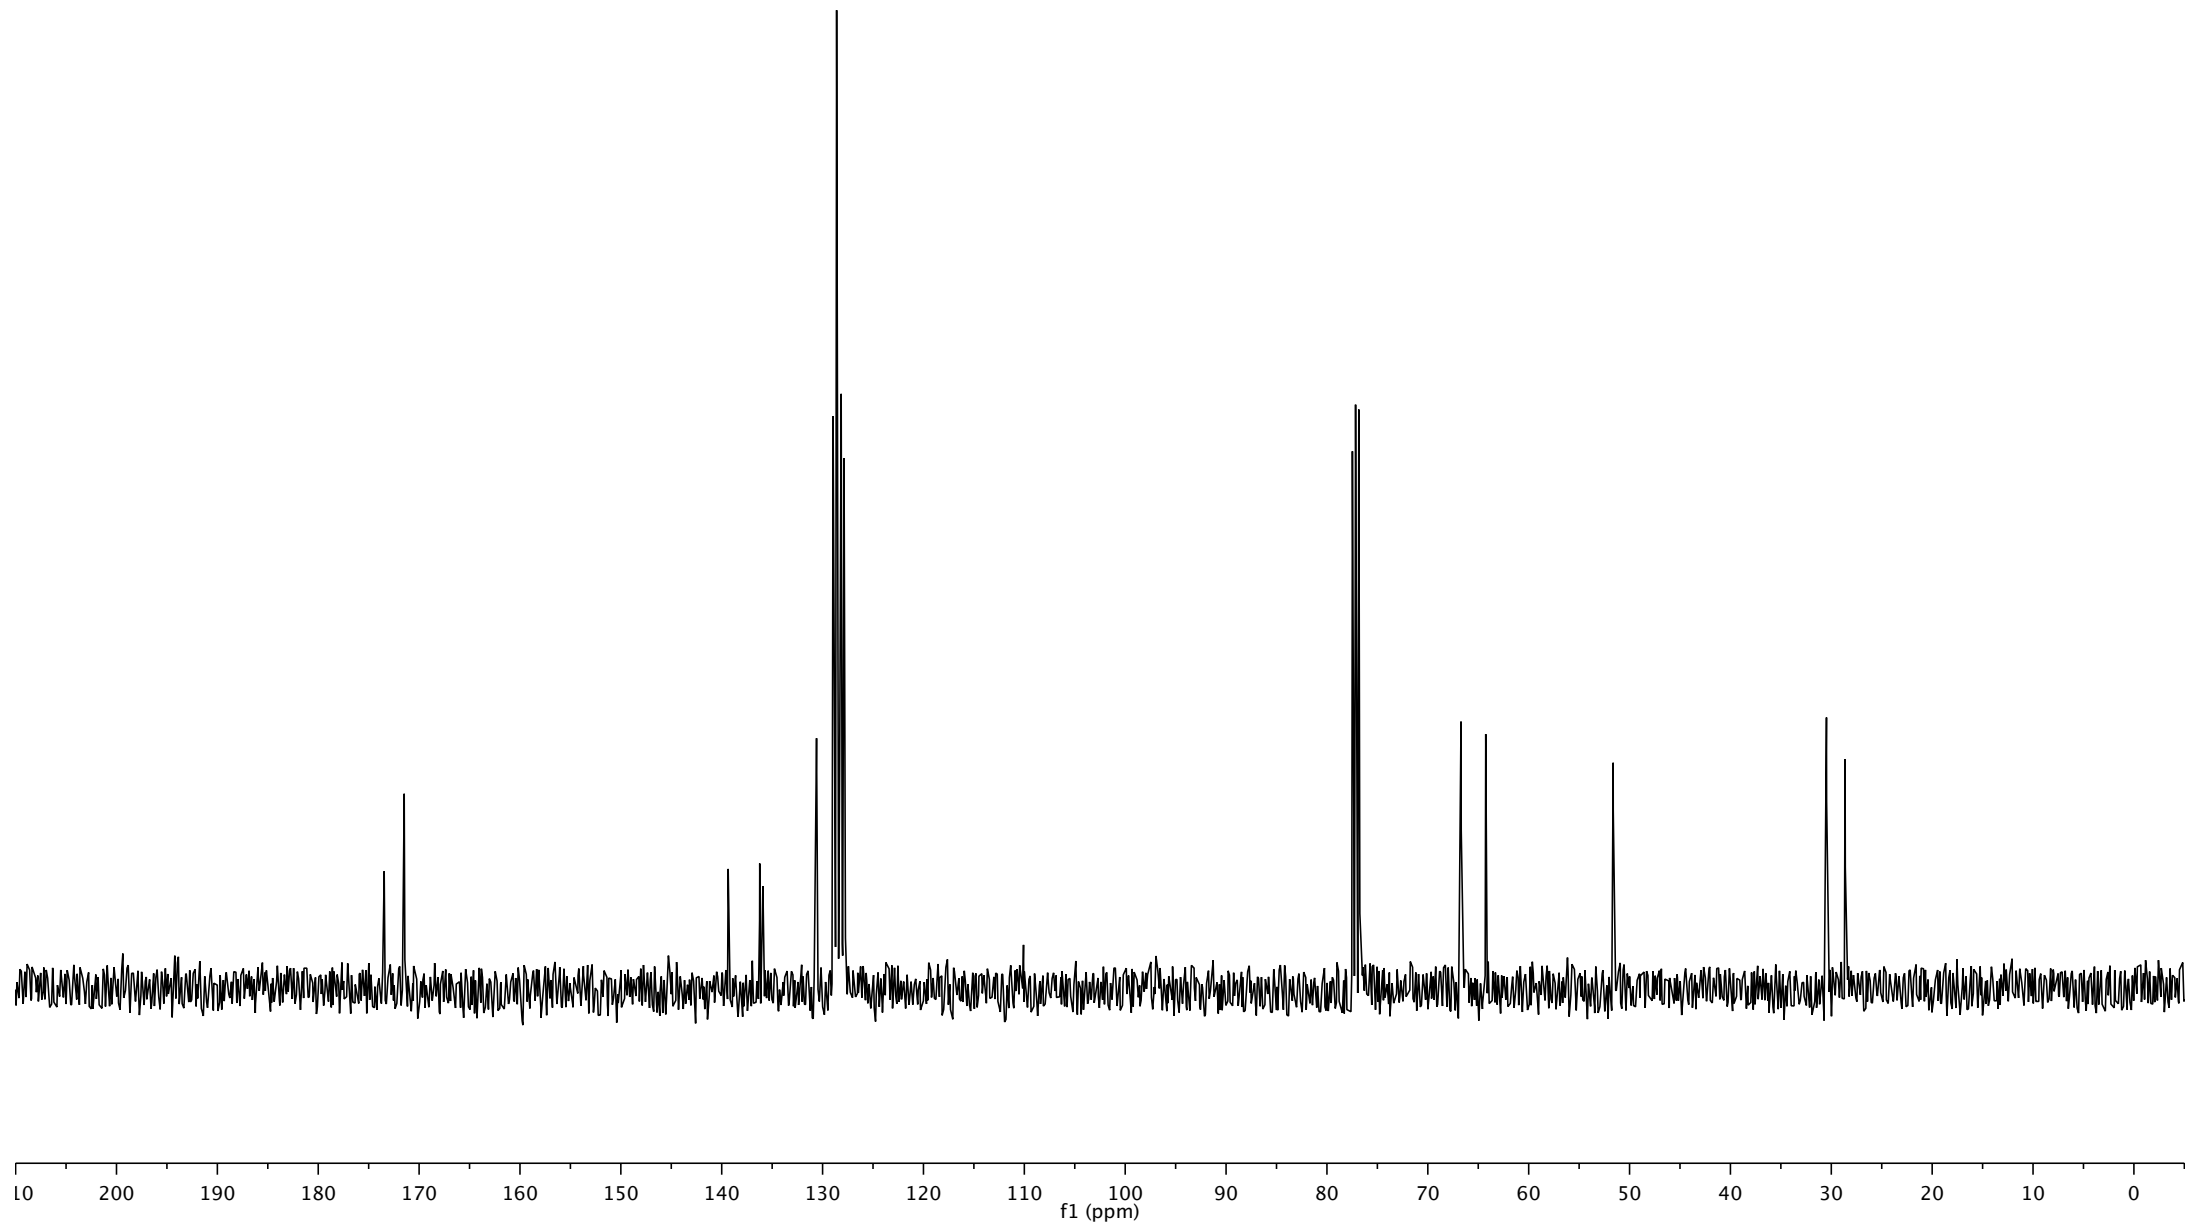

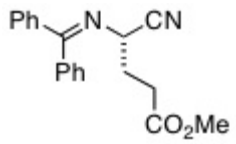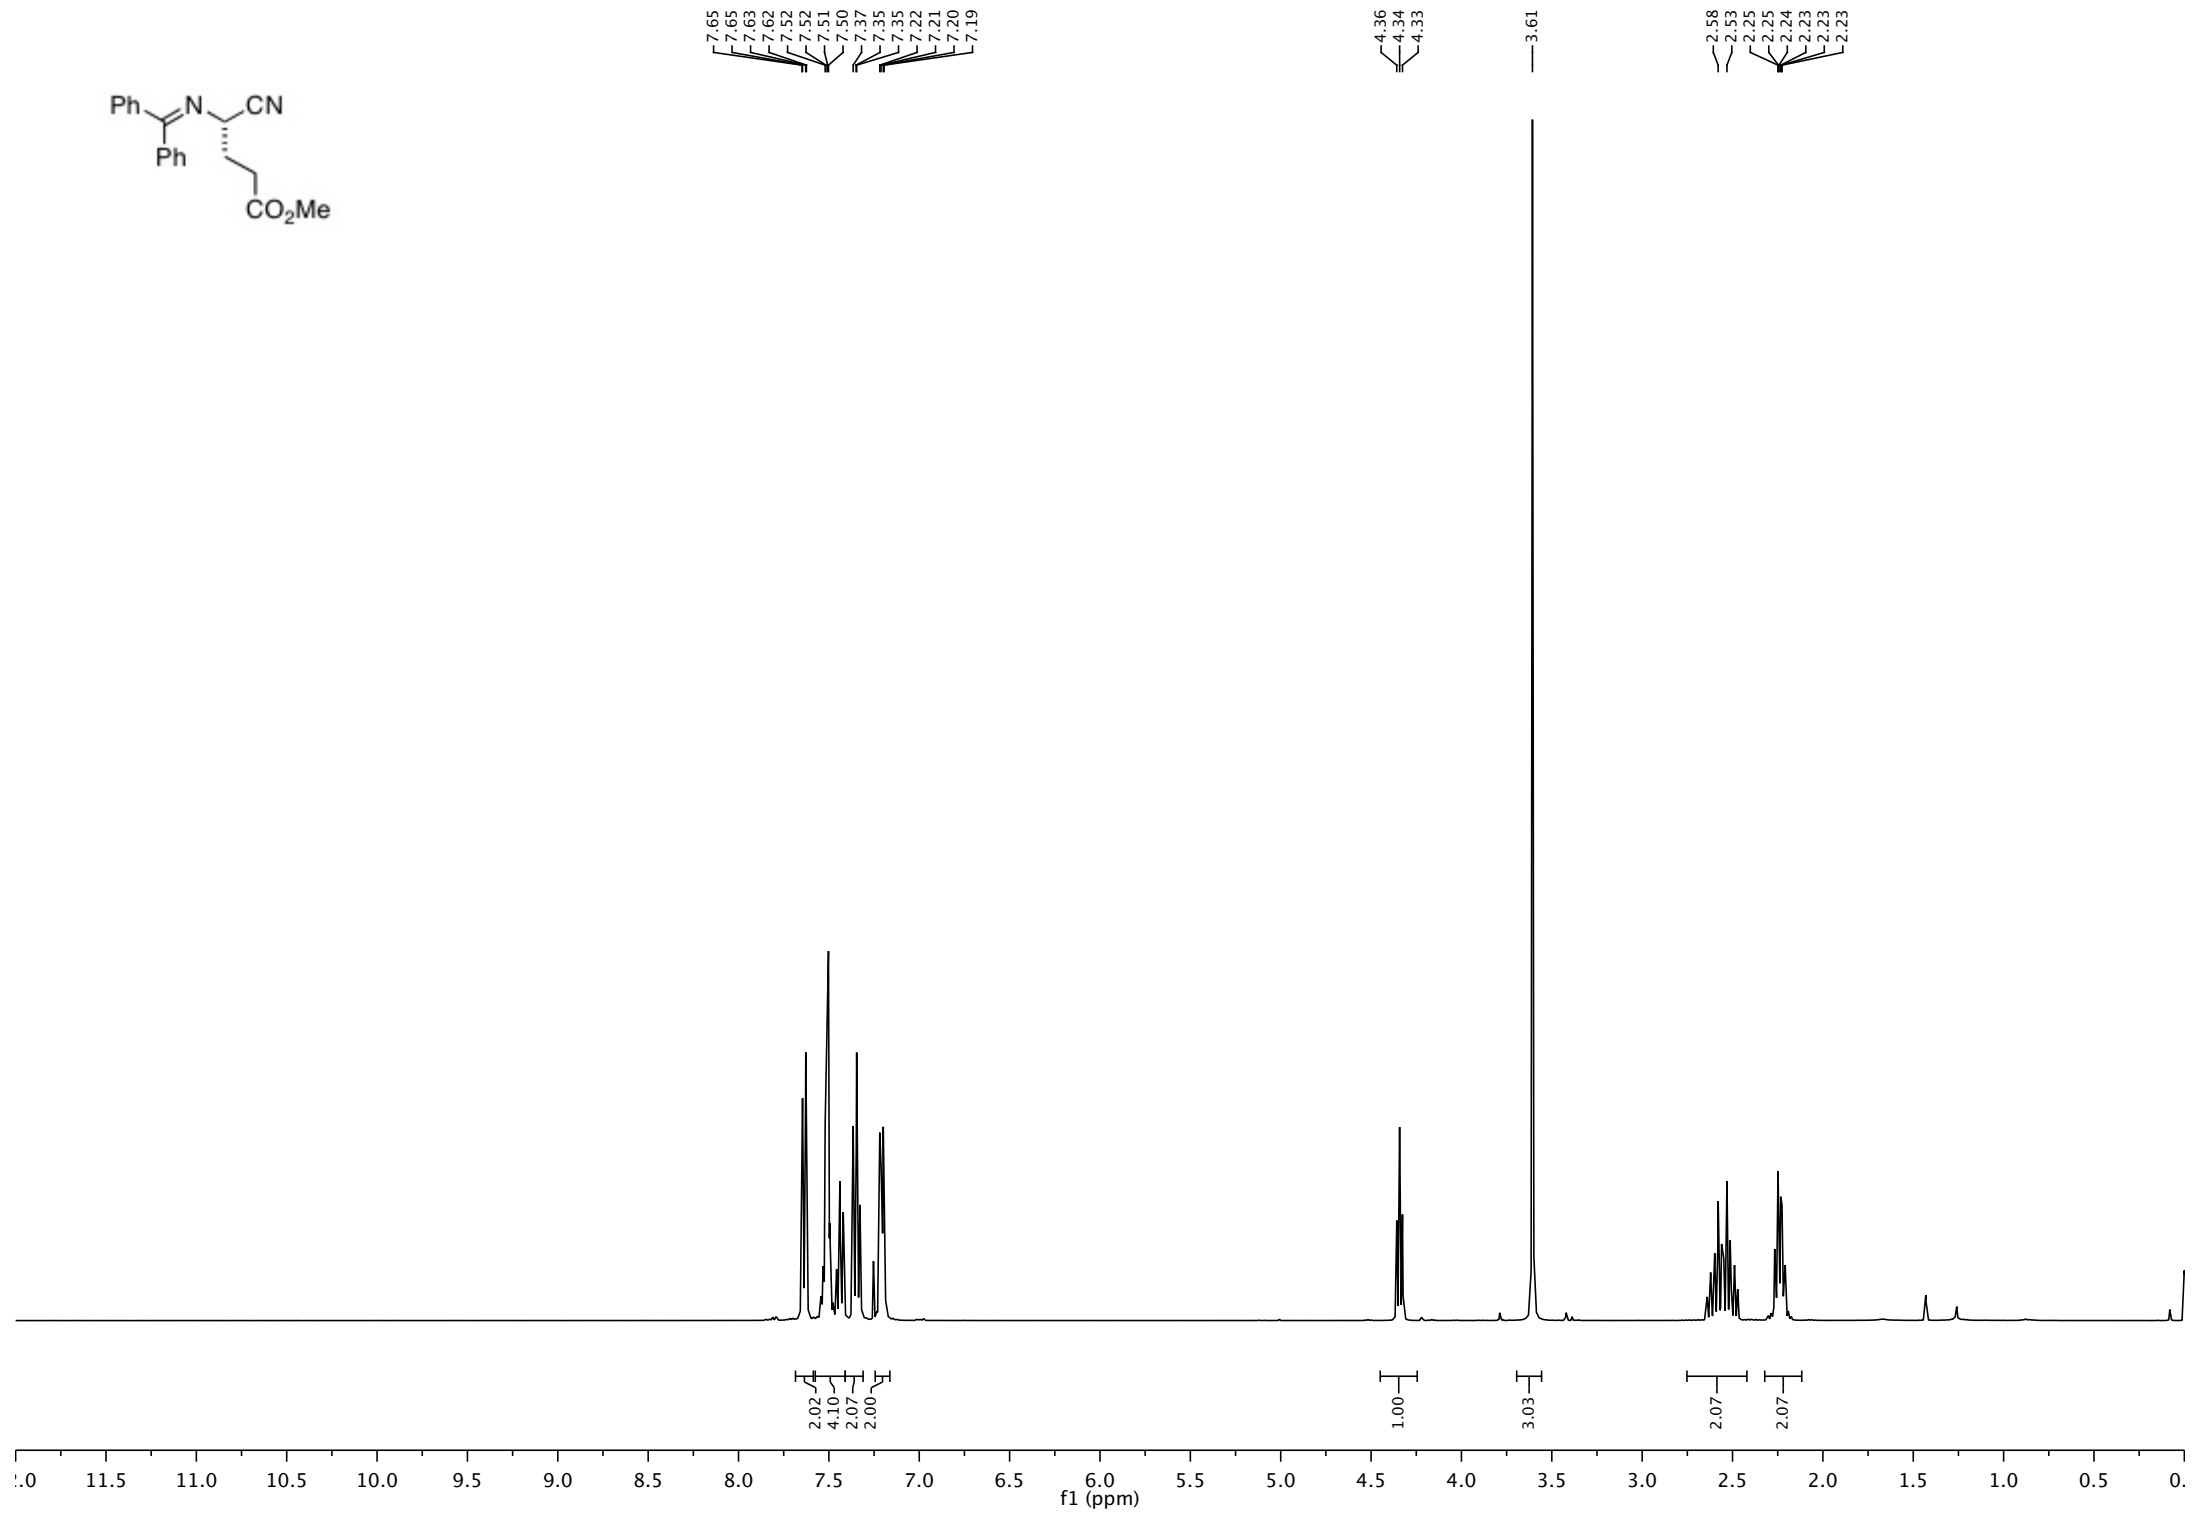



173.80  
172.60

138.34  
135.13  
131.40  
129.52  
129.12  
128.32  
127.42  
119.11

77.48  
77.16  
76.84

51.95  
51.84

30.01  
29.85

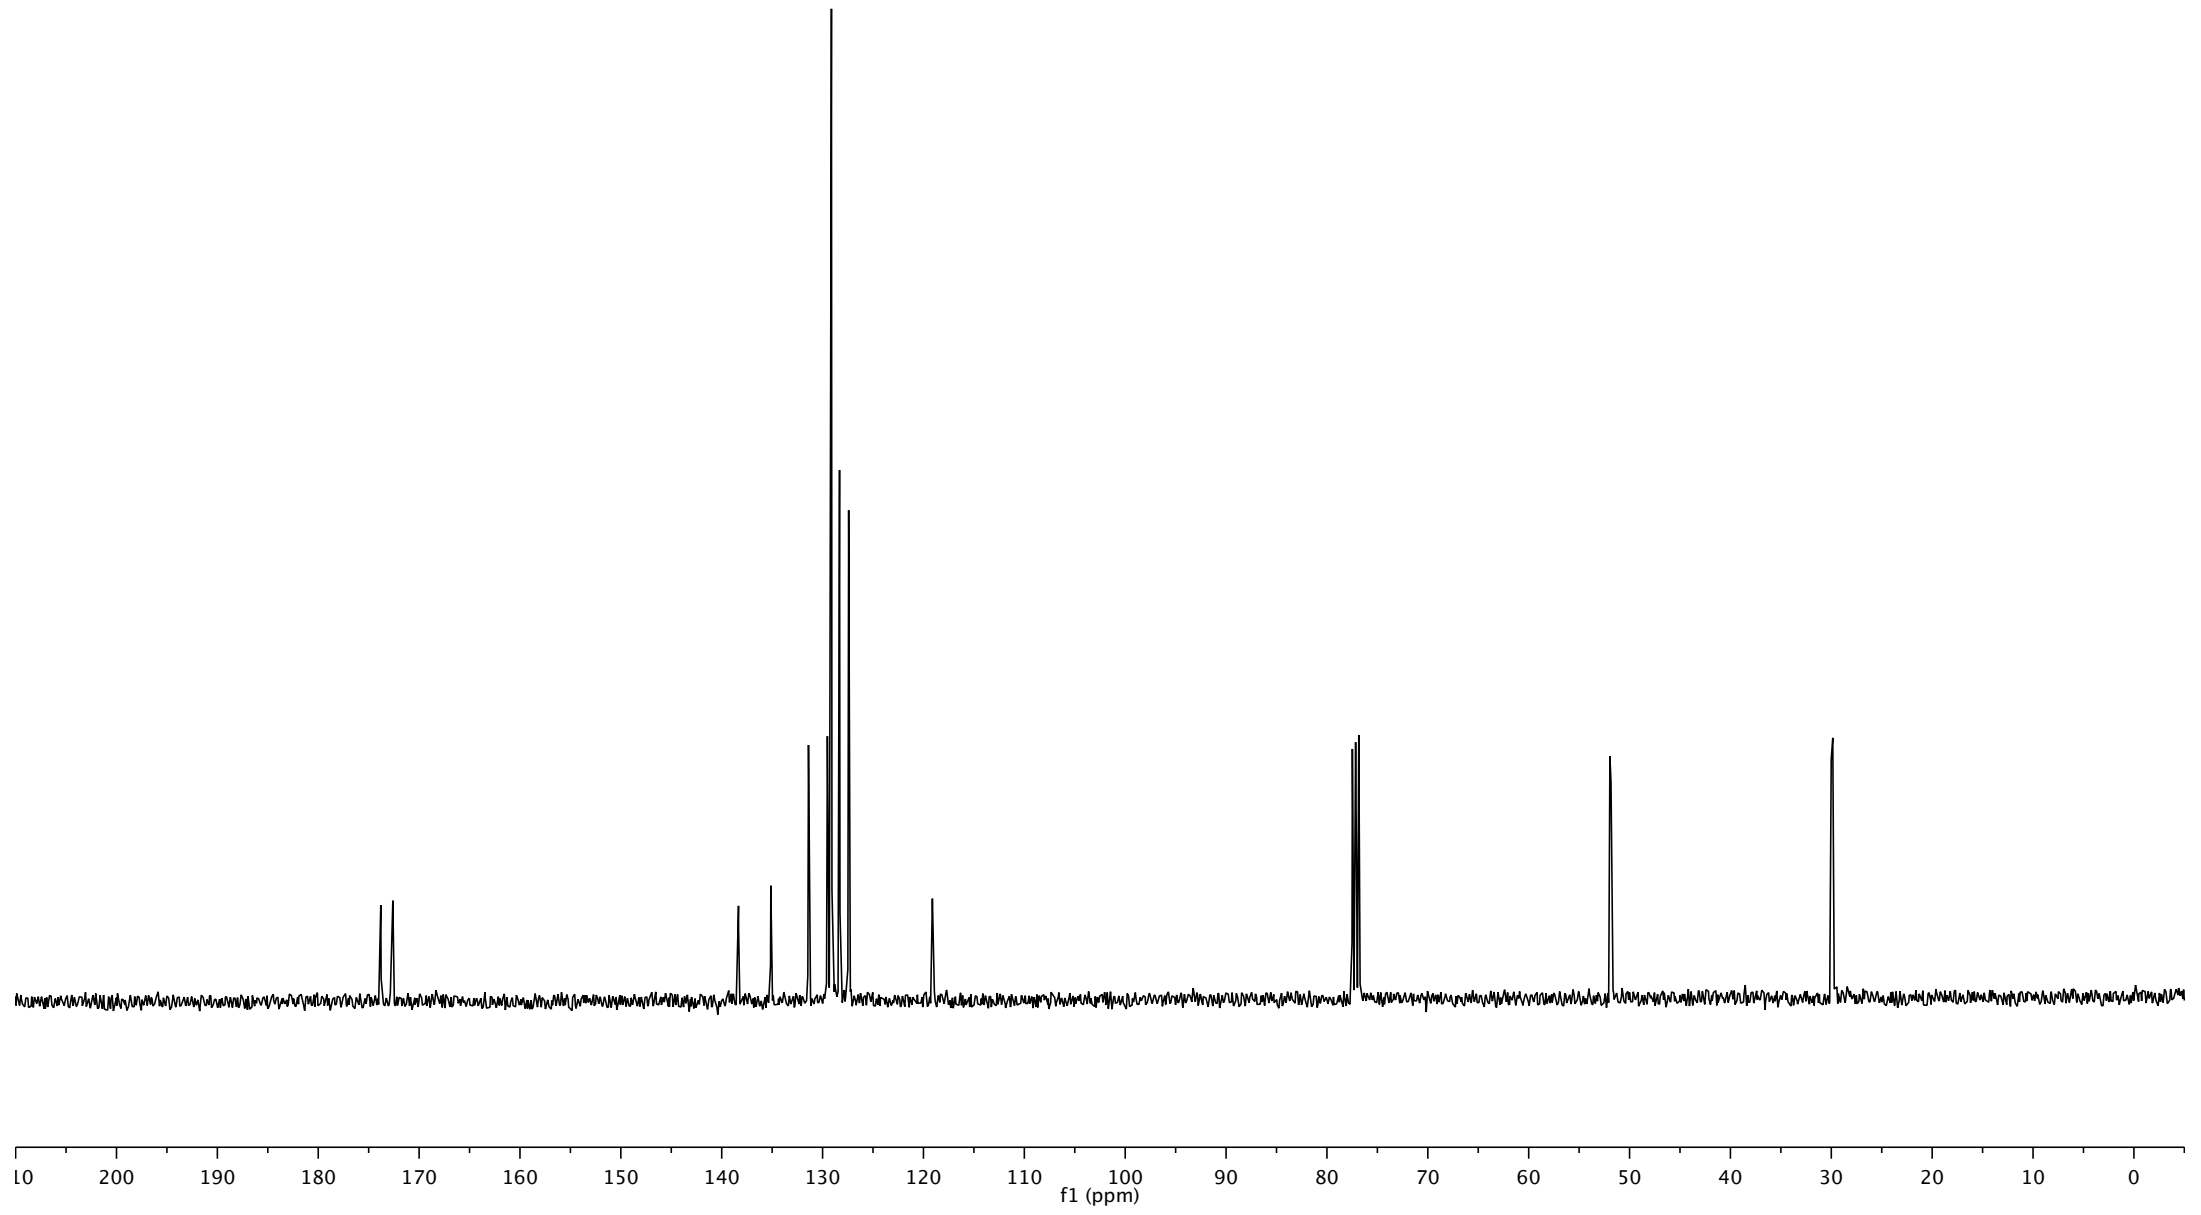

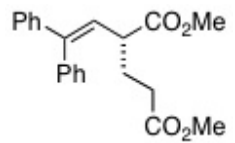

7.39  
7.37  
7.25  
7.25  
7.23  
7.23  
7.20  
7.20  
7.19

6.04  
6.02

3.70  
3.57

3.27  
3.26  
3.26  
3.25  
3.25  
3.24  
2.29  
2.28  
2.28  
2.26  
2.25  
2.25  
2.23  
2.07  
1.96  
1.95  
1.95

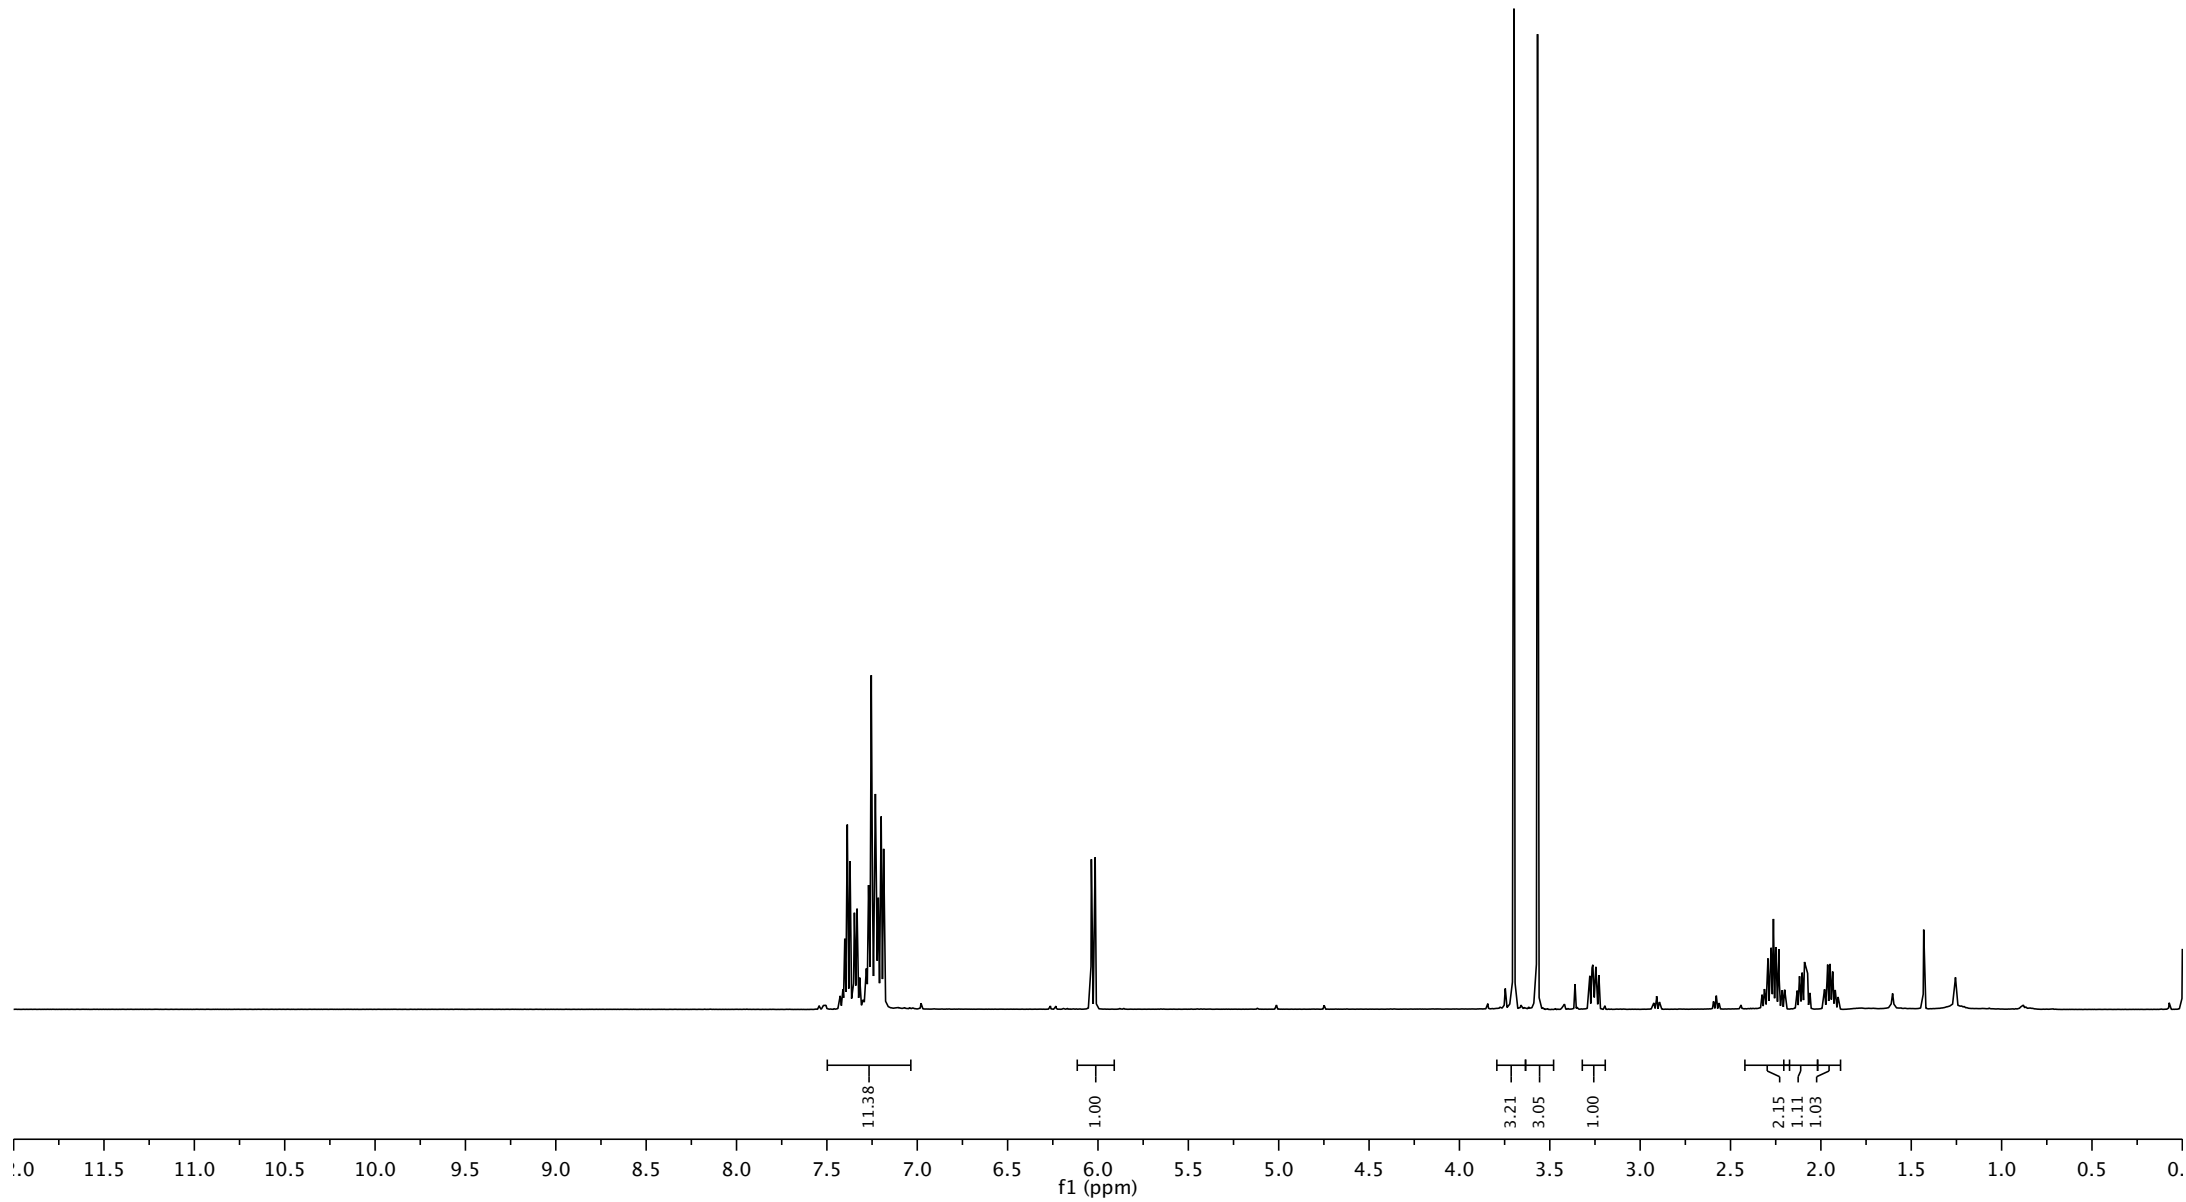

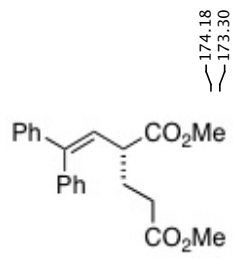

174.18  
173.30

145.18  
141.69  
139.18

129.90  
128.51  
128.31  
127.74  
127.58  
127.46  
125.46

77.41  
77.16  
76.91

52.14  
51.71  
45.33

31.47  
27.91

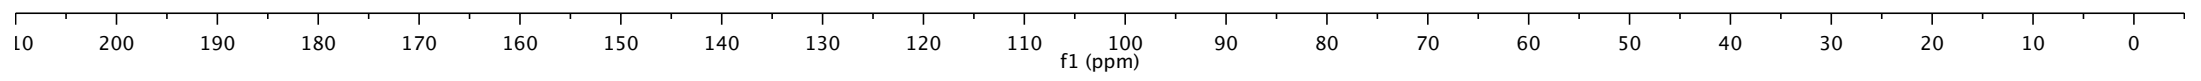



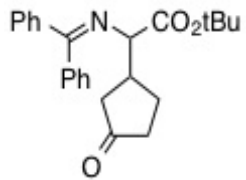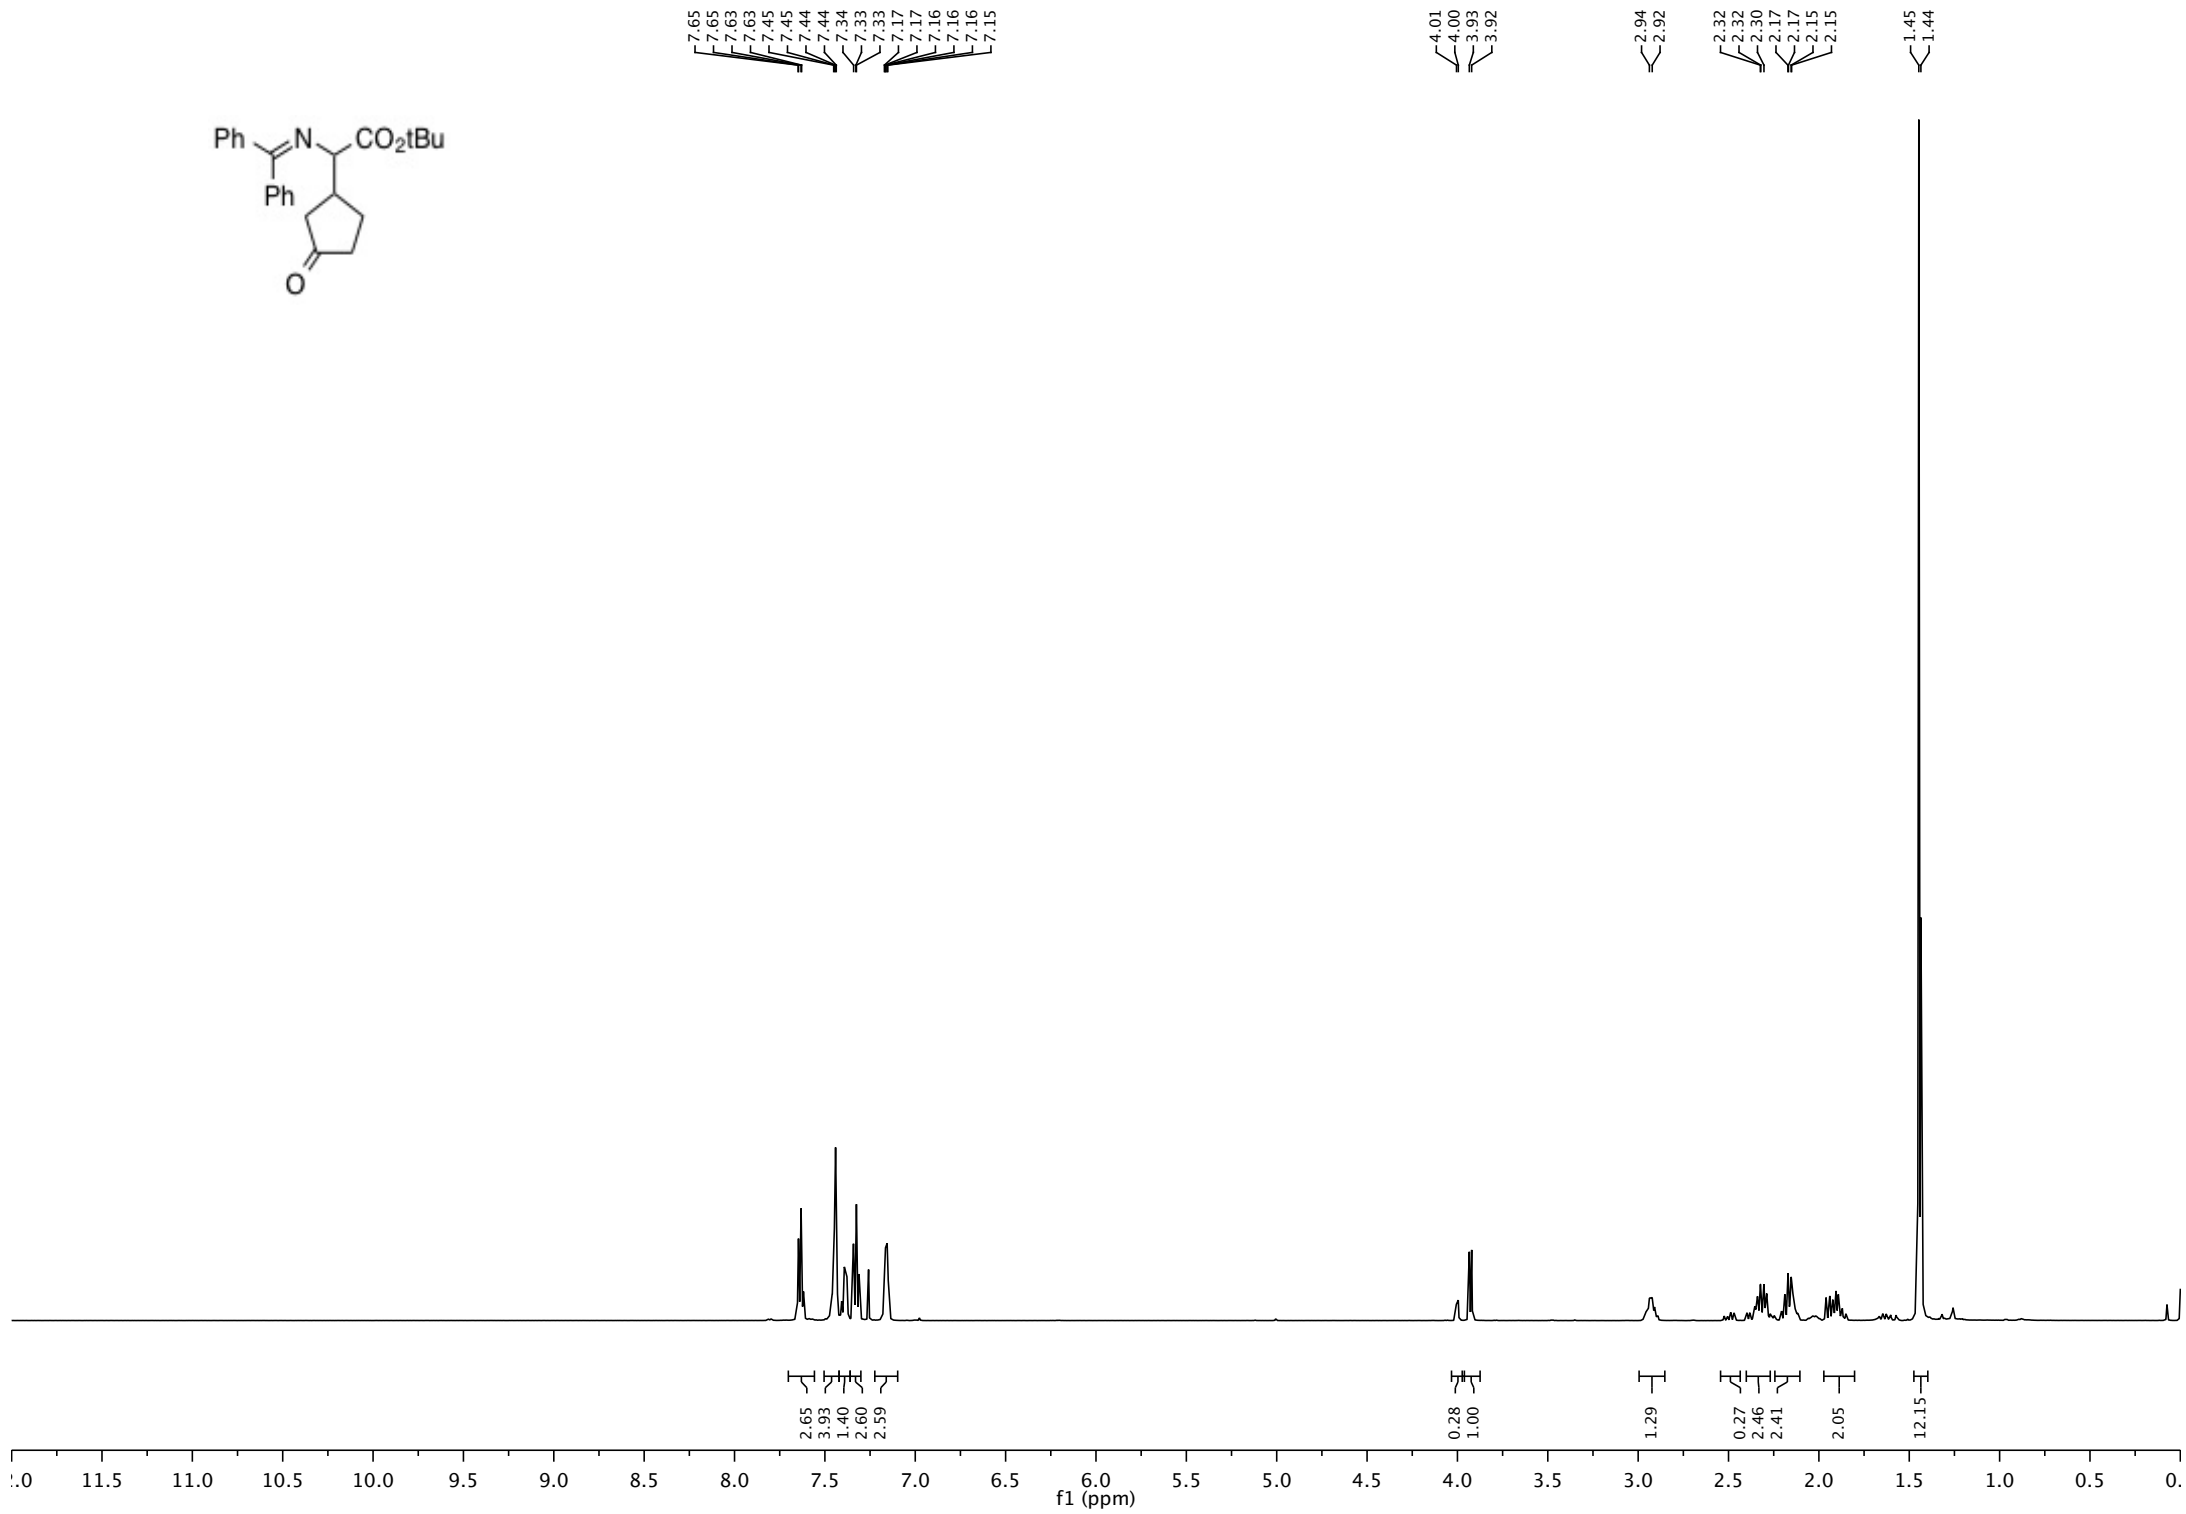

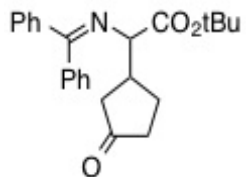

171.40  
171.00  
170.37  
170.31

139.44  
136.57  
130.59  
130.57  
128.92  
128.82  
128.76  
128.68  
128.67  
128.66  
128.21  
128.18  
127.92  
127.87

81.57  
81.54  
77.41  
77.36  
77.16  
76.91  
69.12  
68.52

42.17  
40.96  
40.26  
40.13  
38.31

28.19  
28.17  
26.35  
25.50

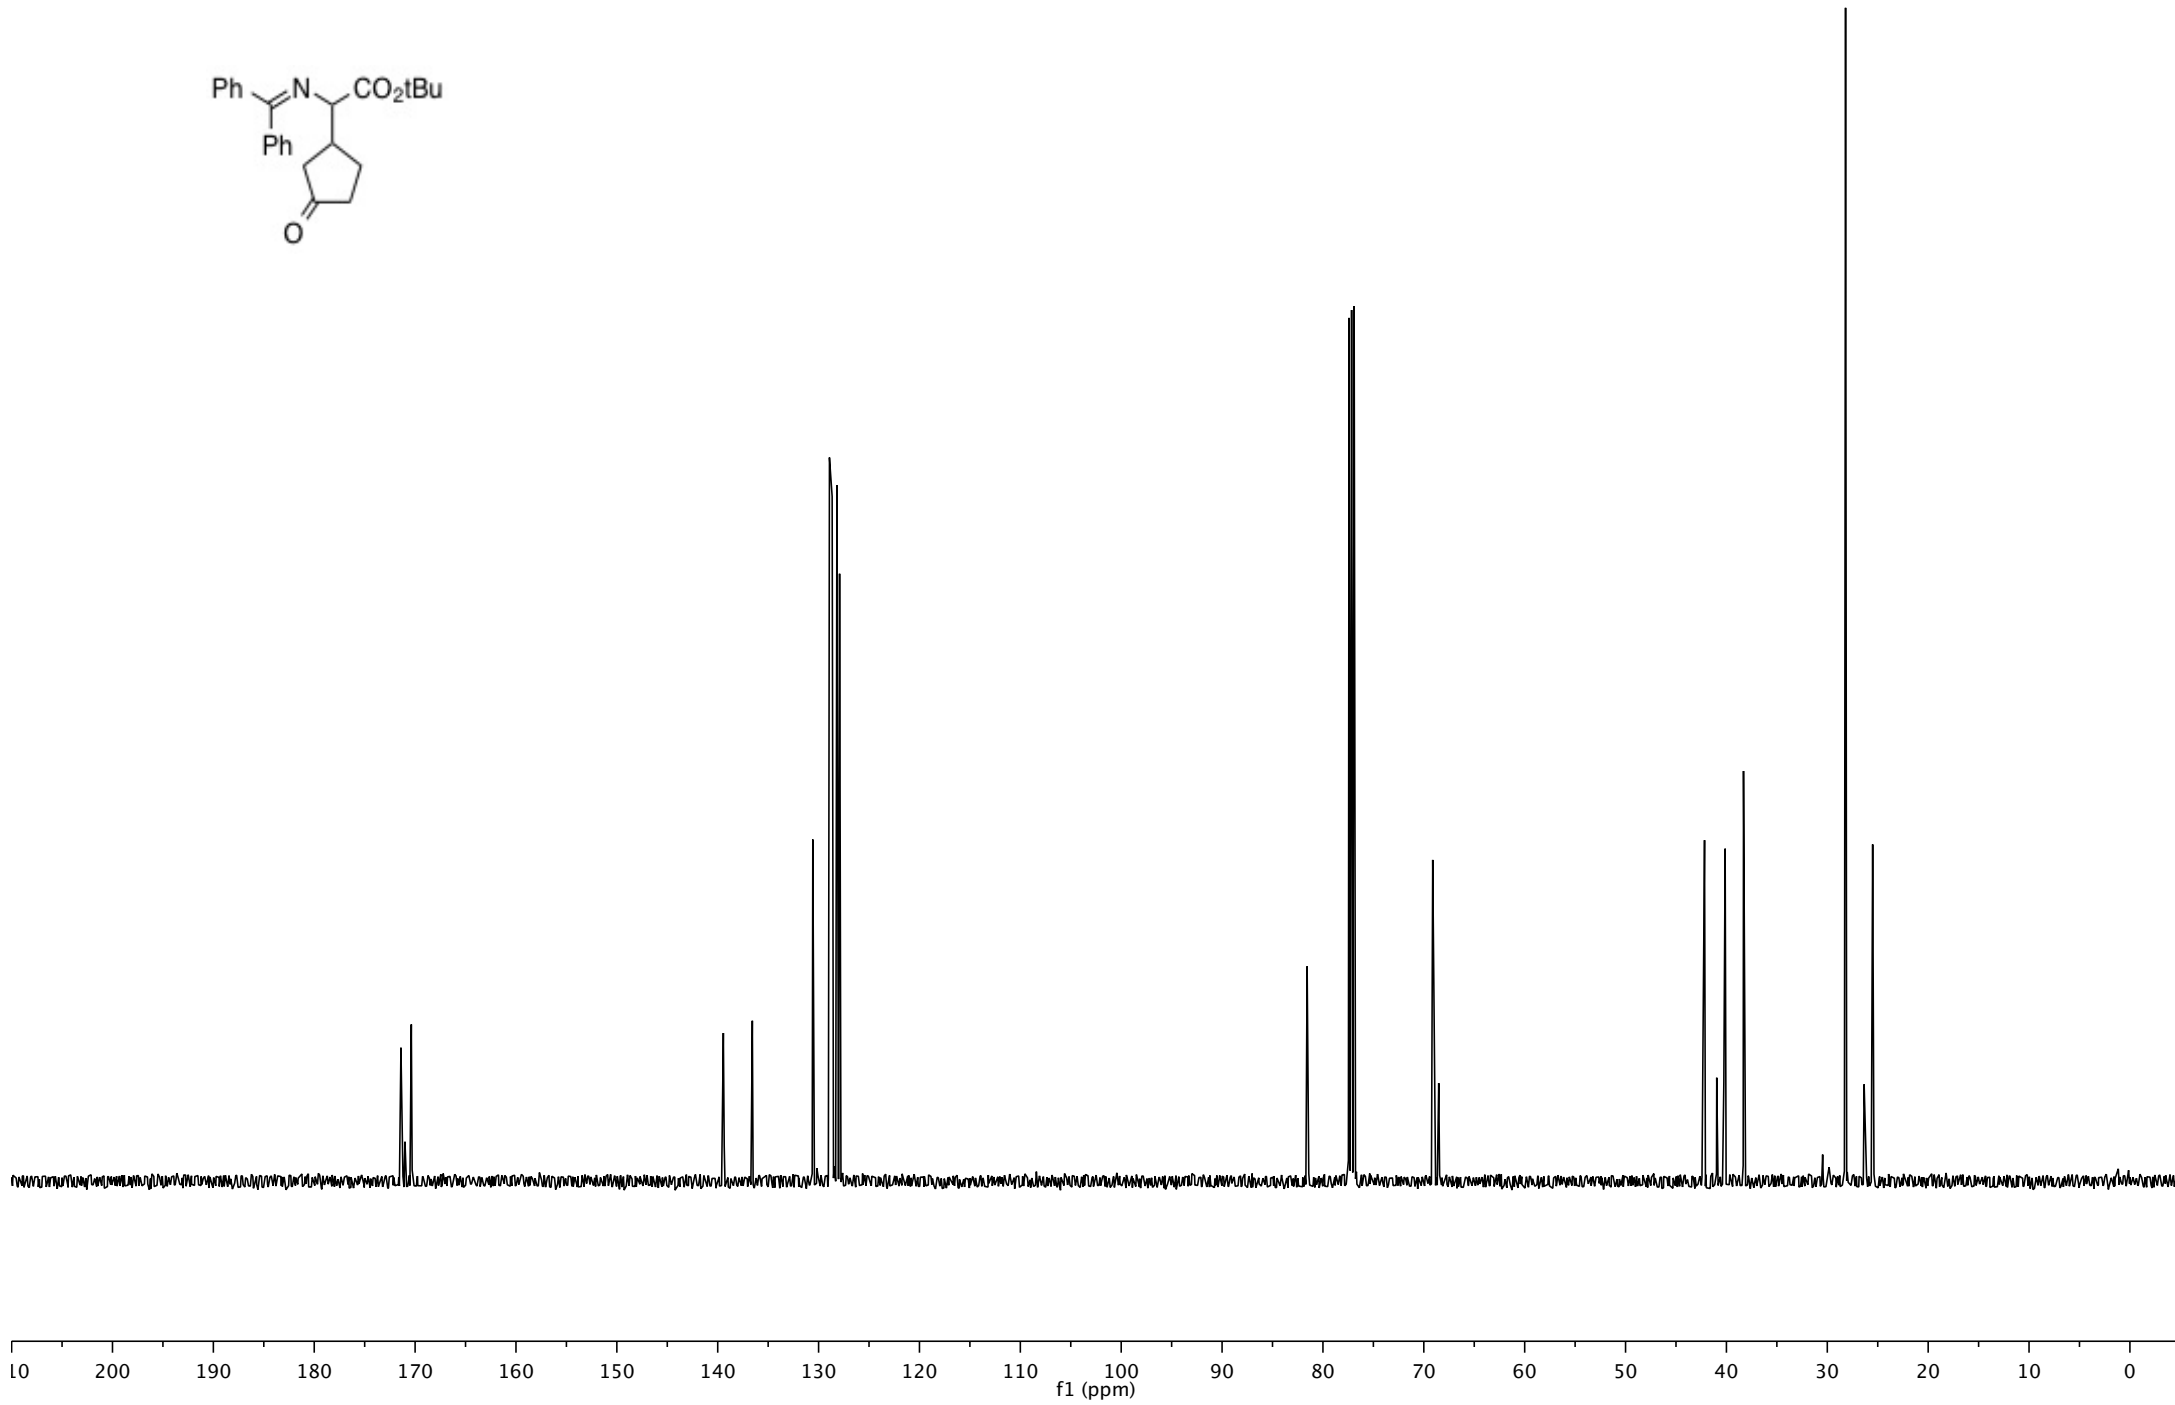

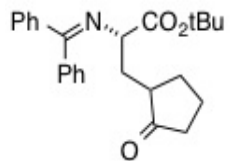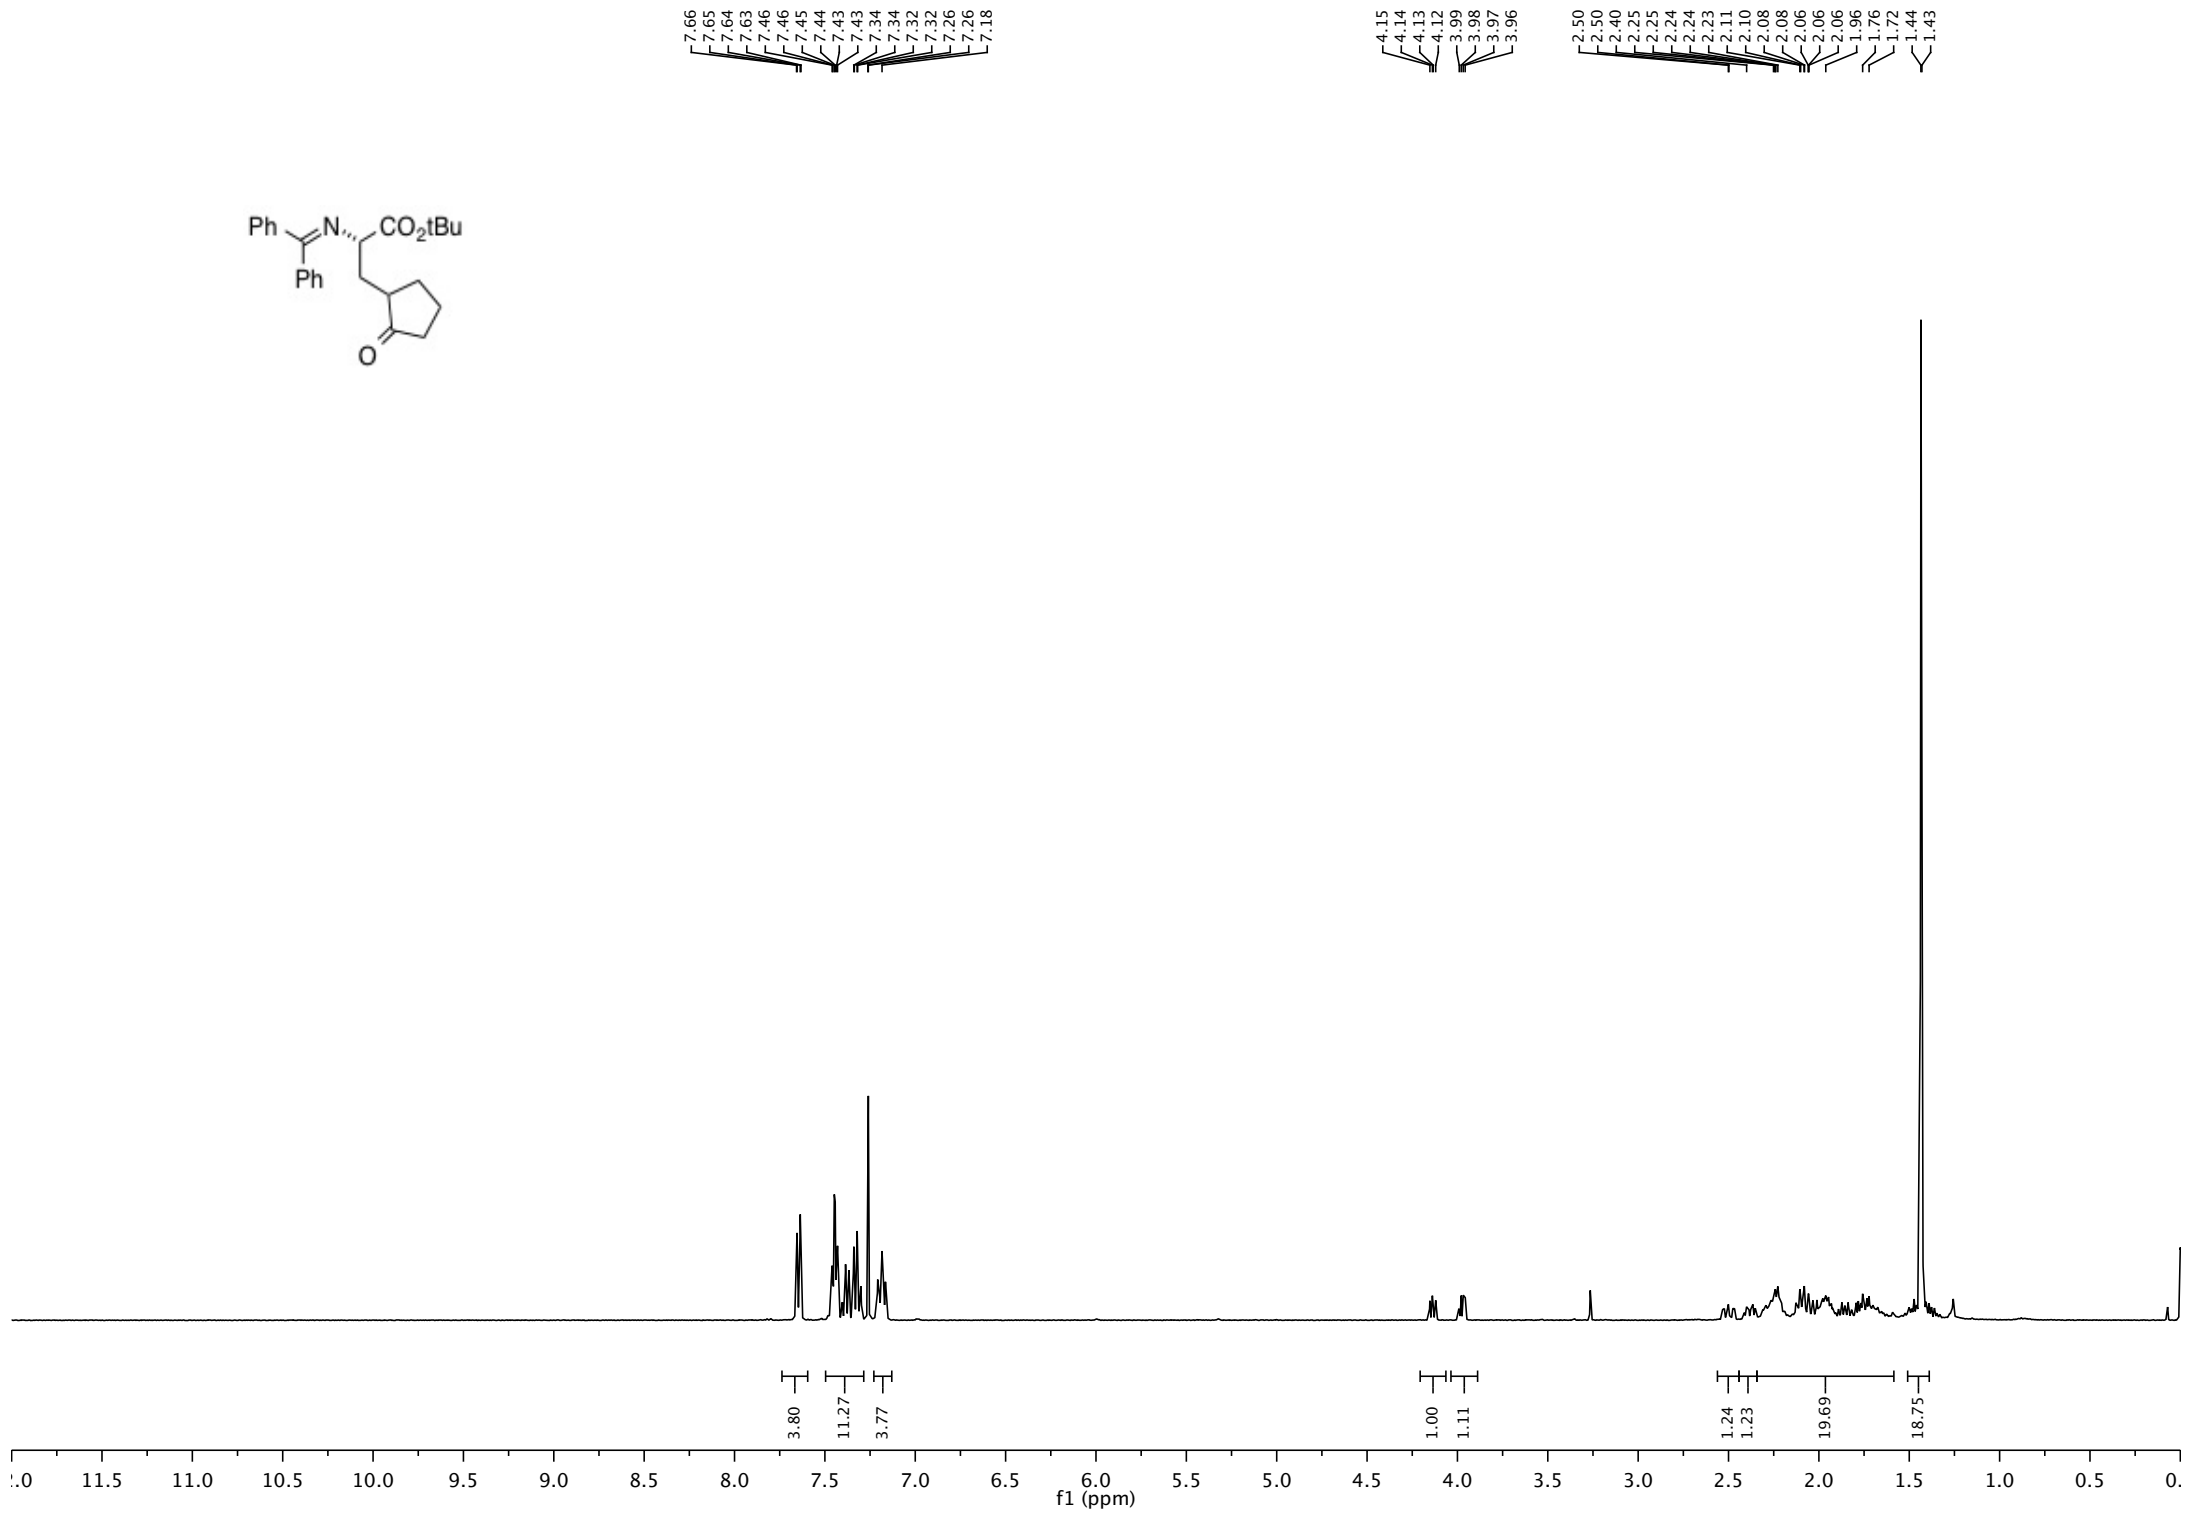

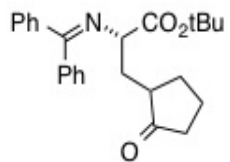

171.36  
171.33  
170.50  
170.35

139.58  
136.54  
130.40  
130.35  
128.93  
128.79  
128.70  
128.54  
128.12  
127.93  
127.84

81.24  
81.17

64.57  
64.07

46.56

37.94  
37.82  
34.01  
33.89  
30.64  
29.84  
28.15

20.90  
20.78

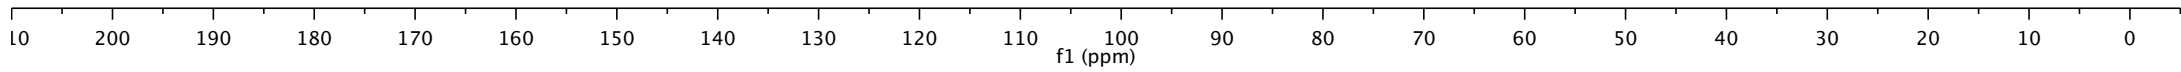

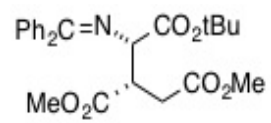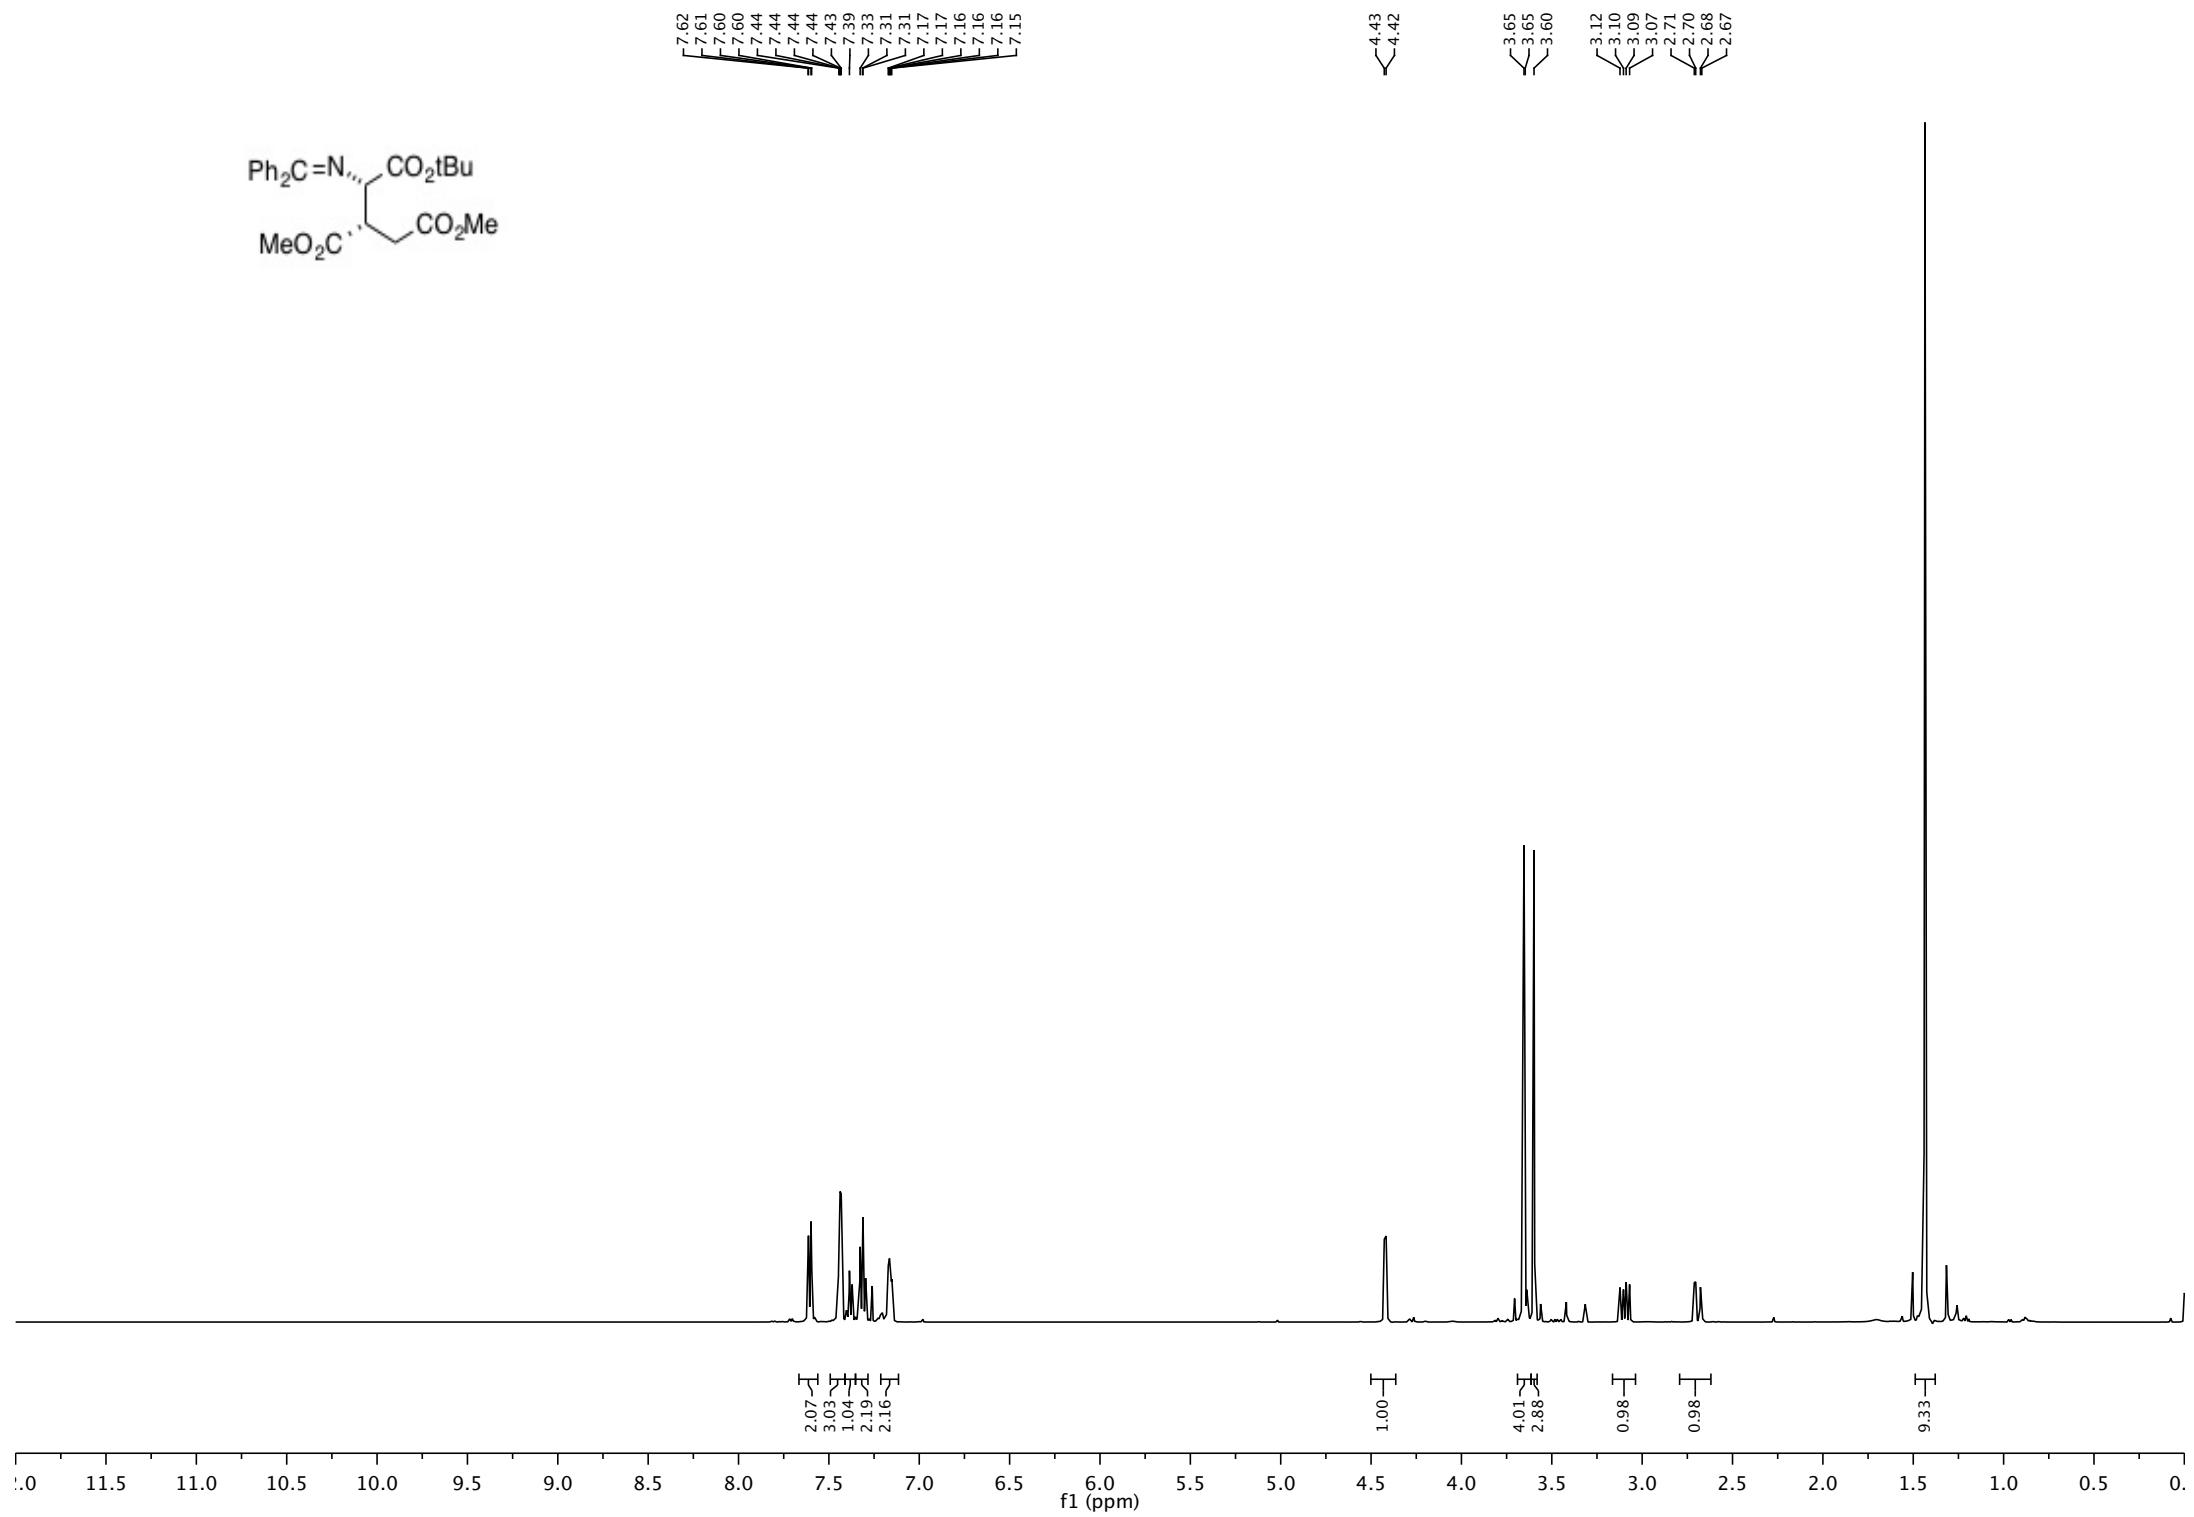

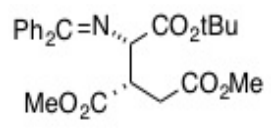

172.85  
172.70  
172.15  
169.28

139.43  
136.14  
130.63  
129.10  
128.92  
128.44  
128.10  
127.96

82.07  
77.41  
77.16  
76.91

66.21

52.05  
51.88

44.72

32.35  
28.05

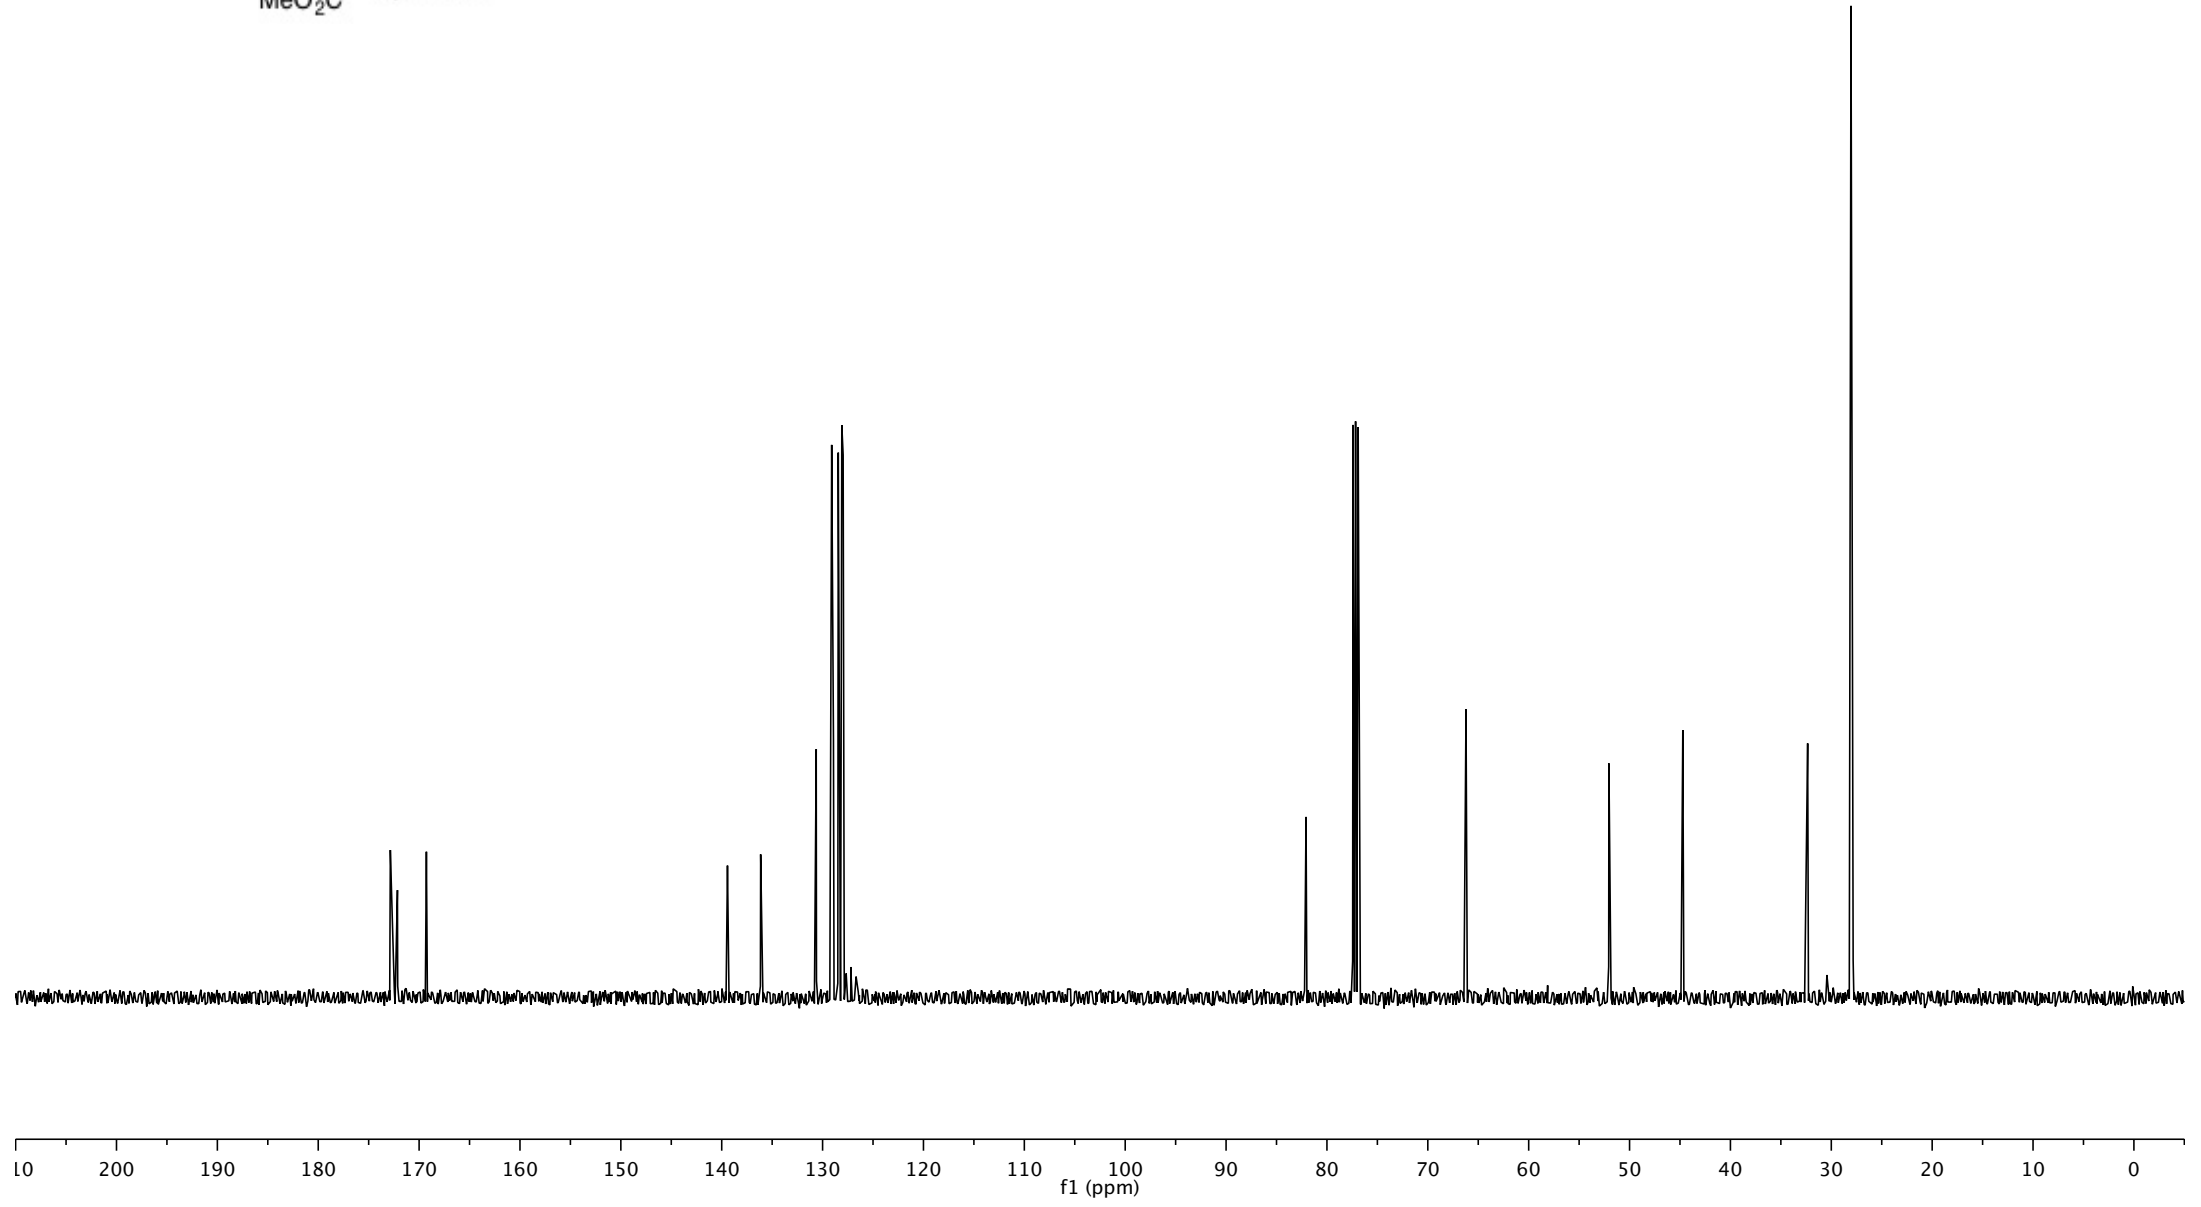

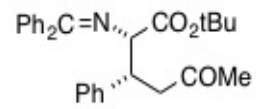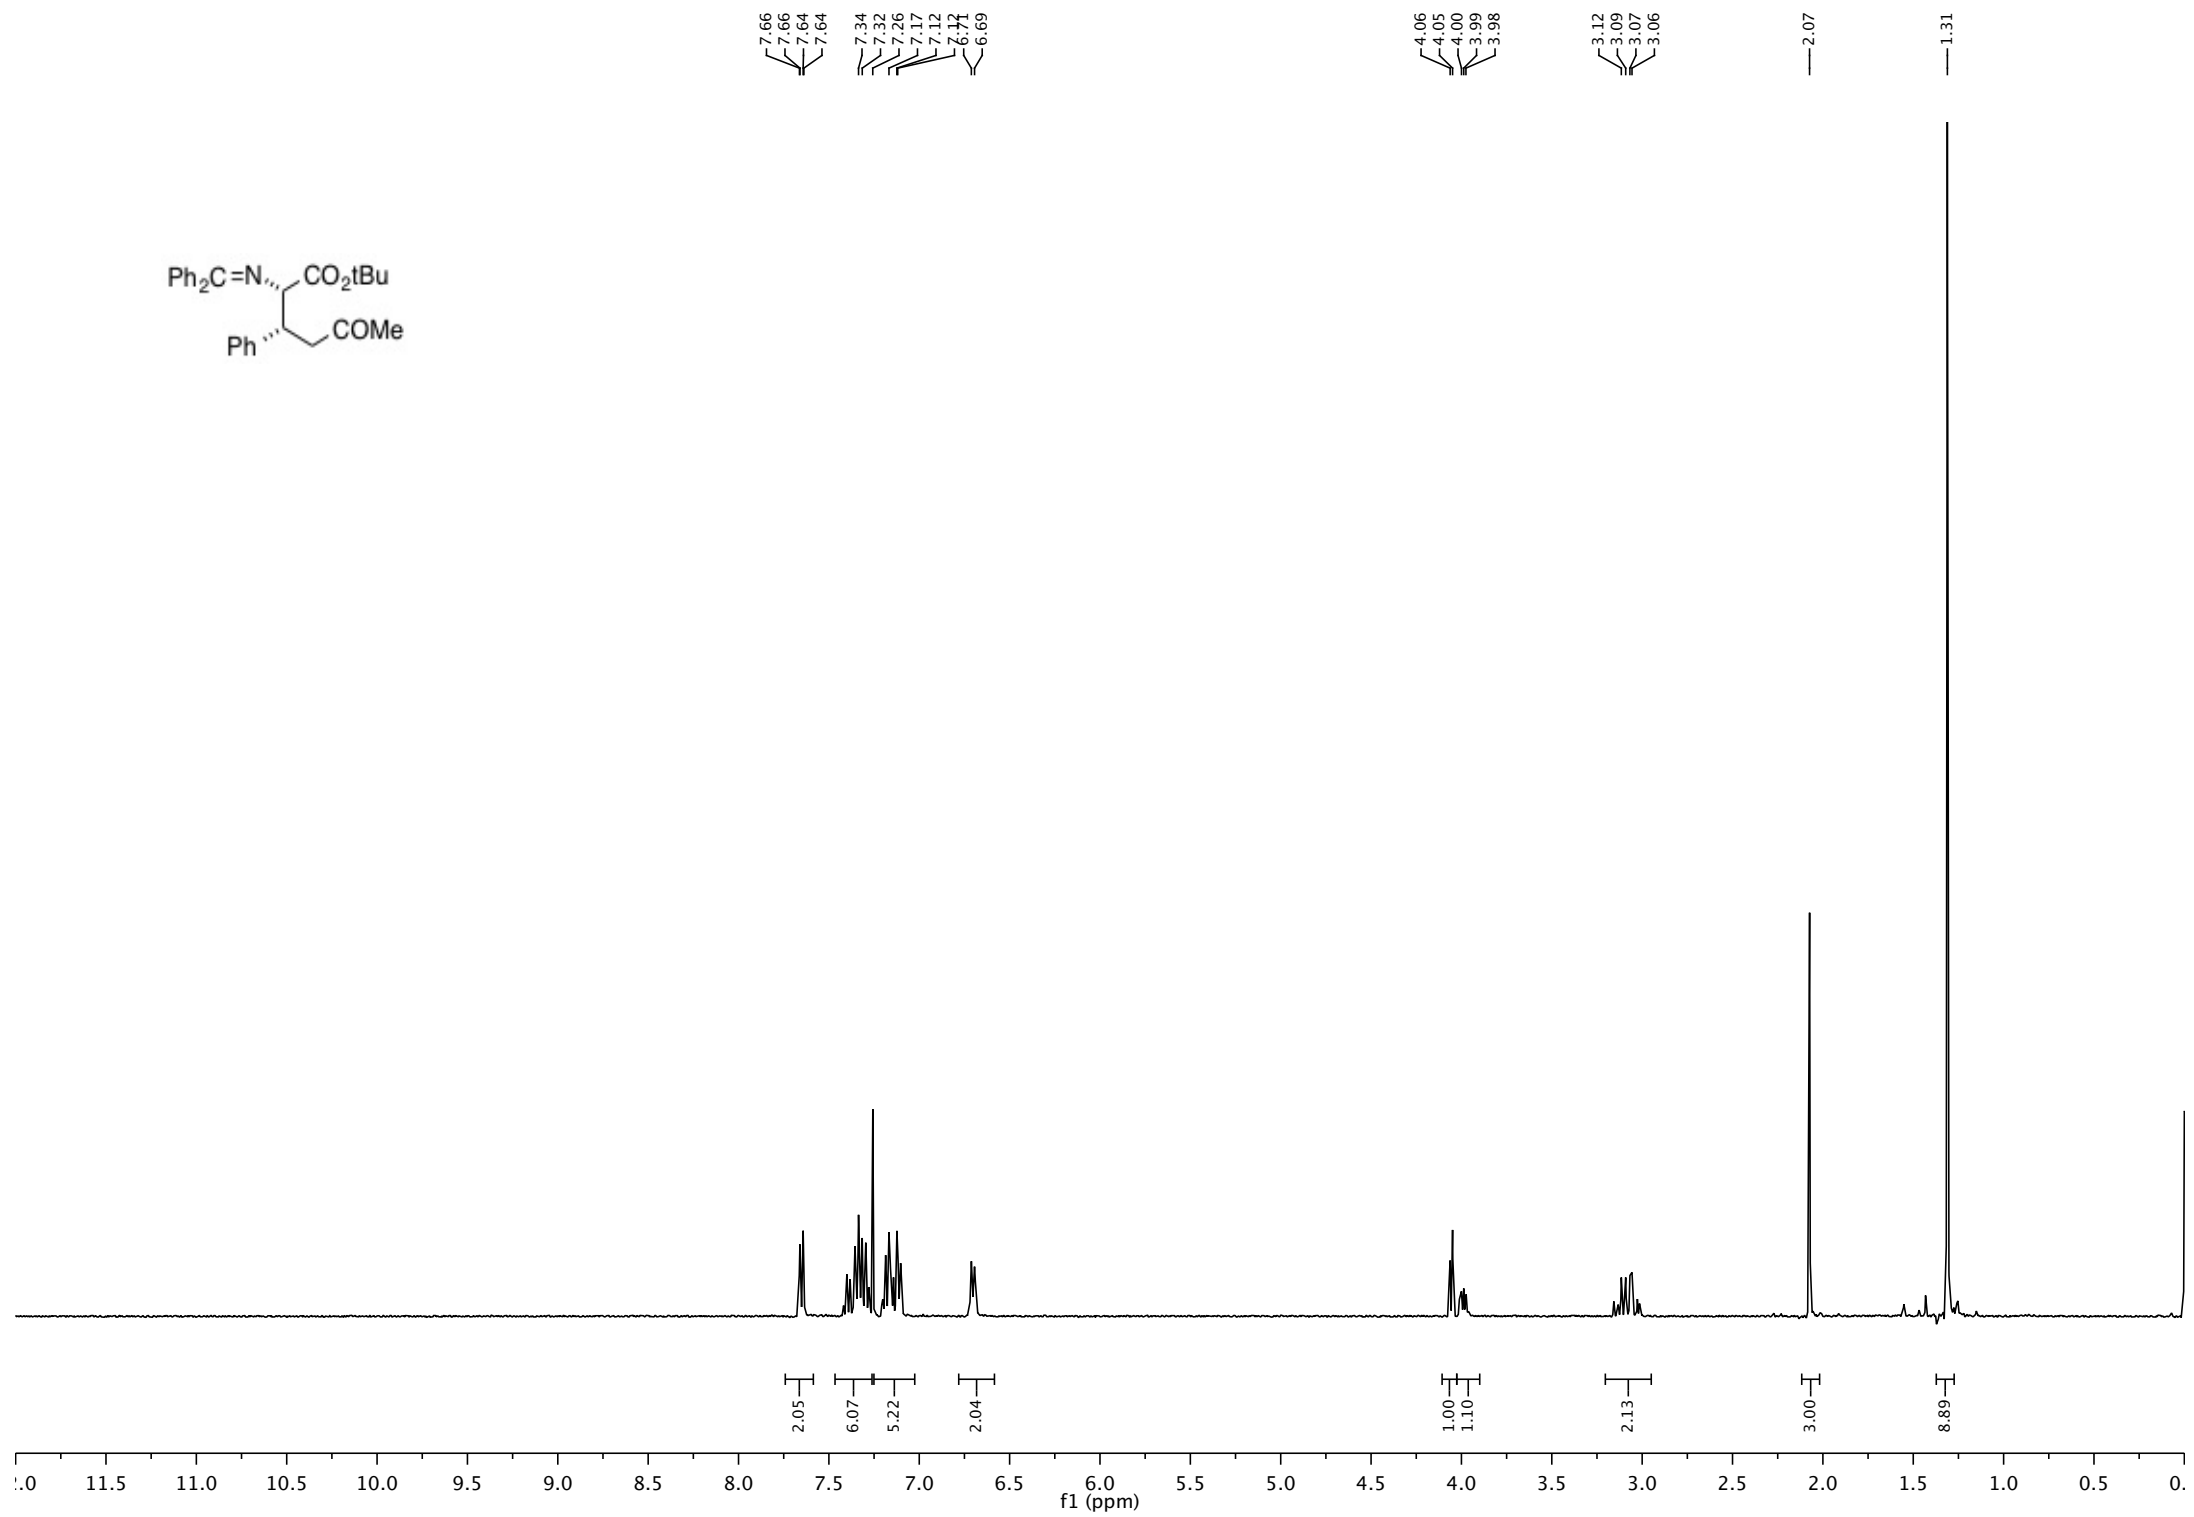

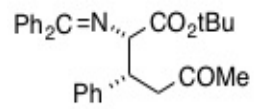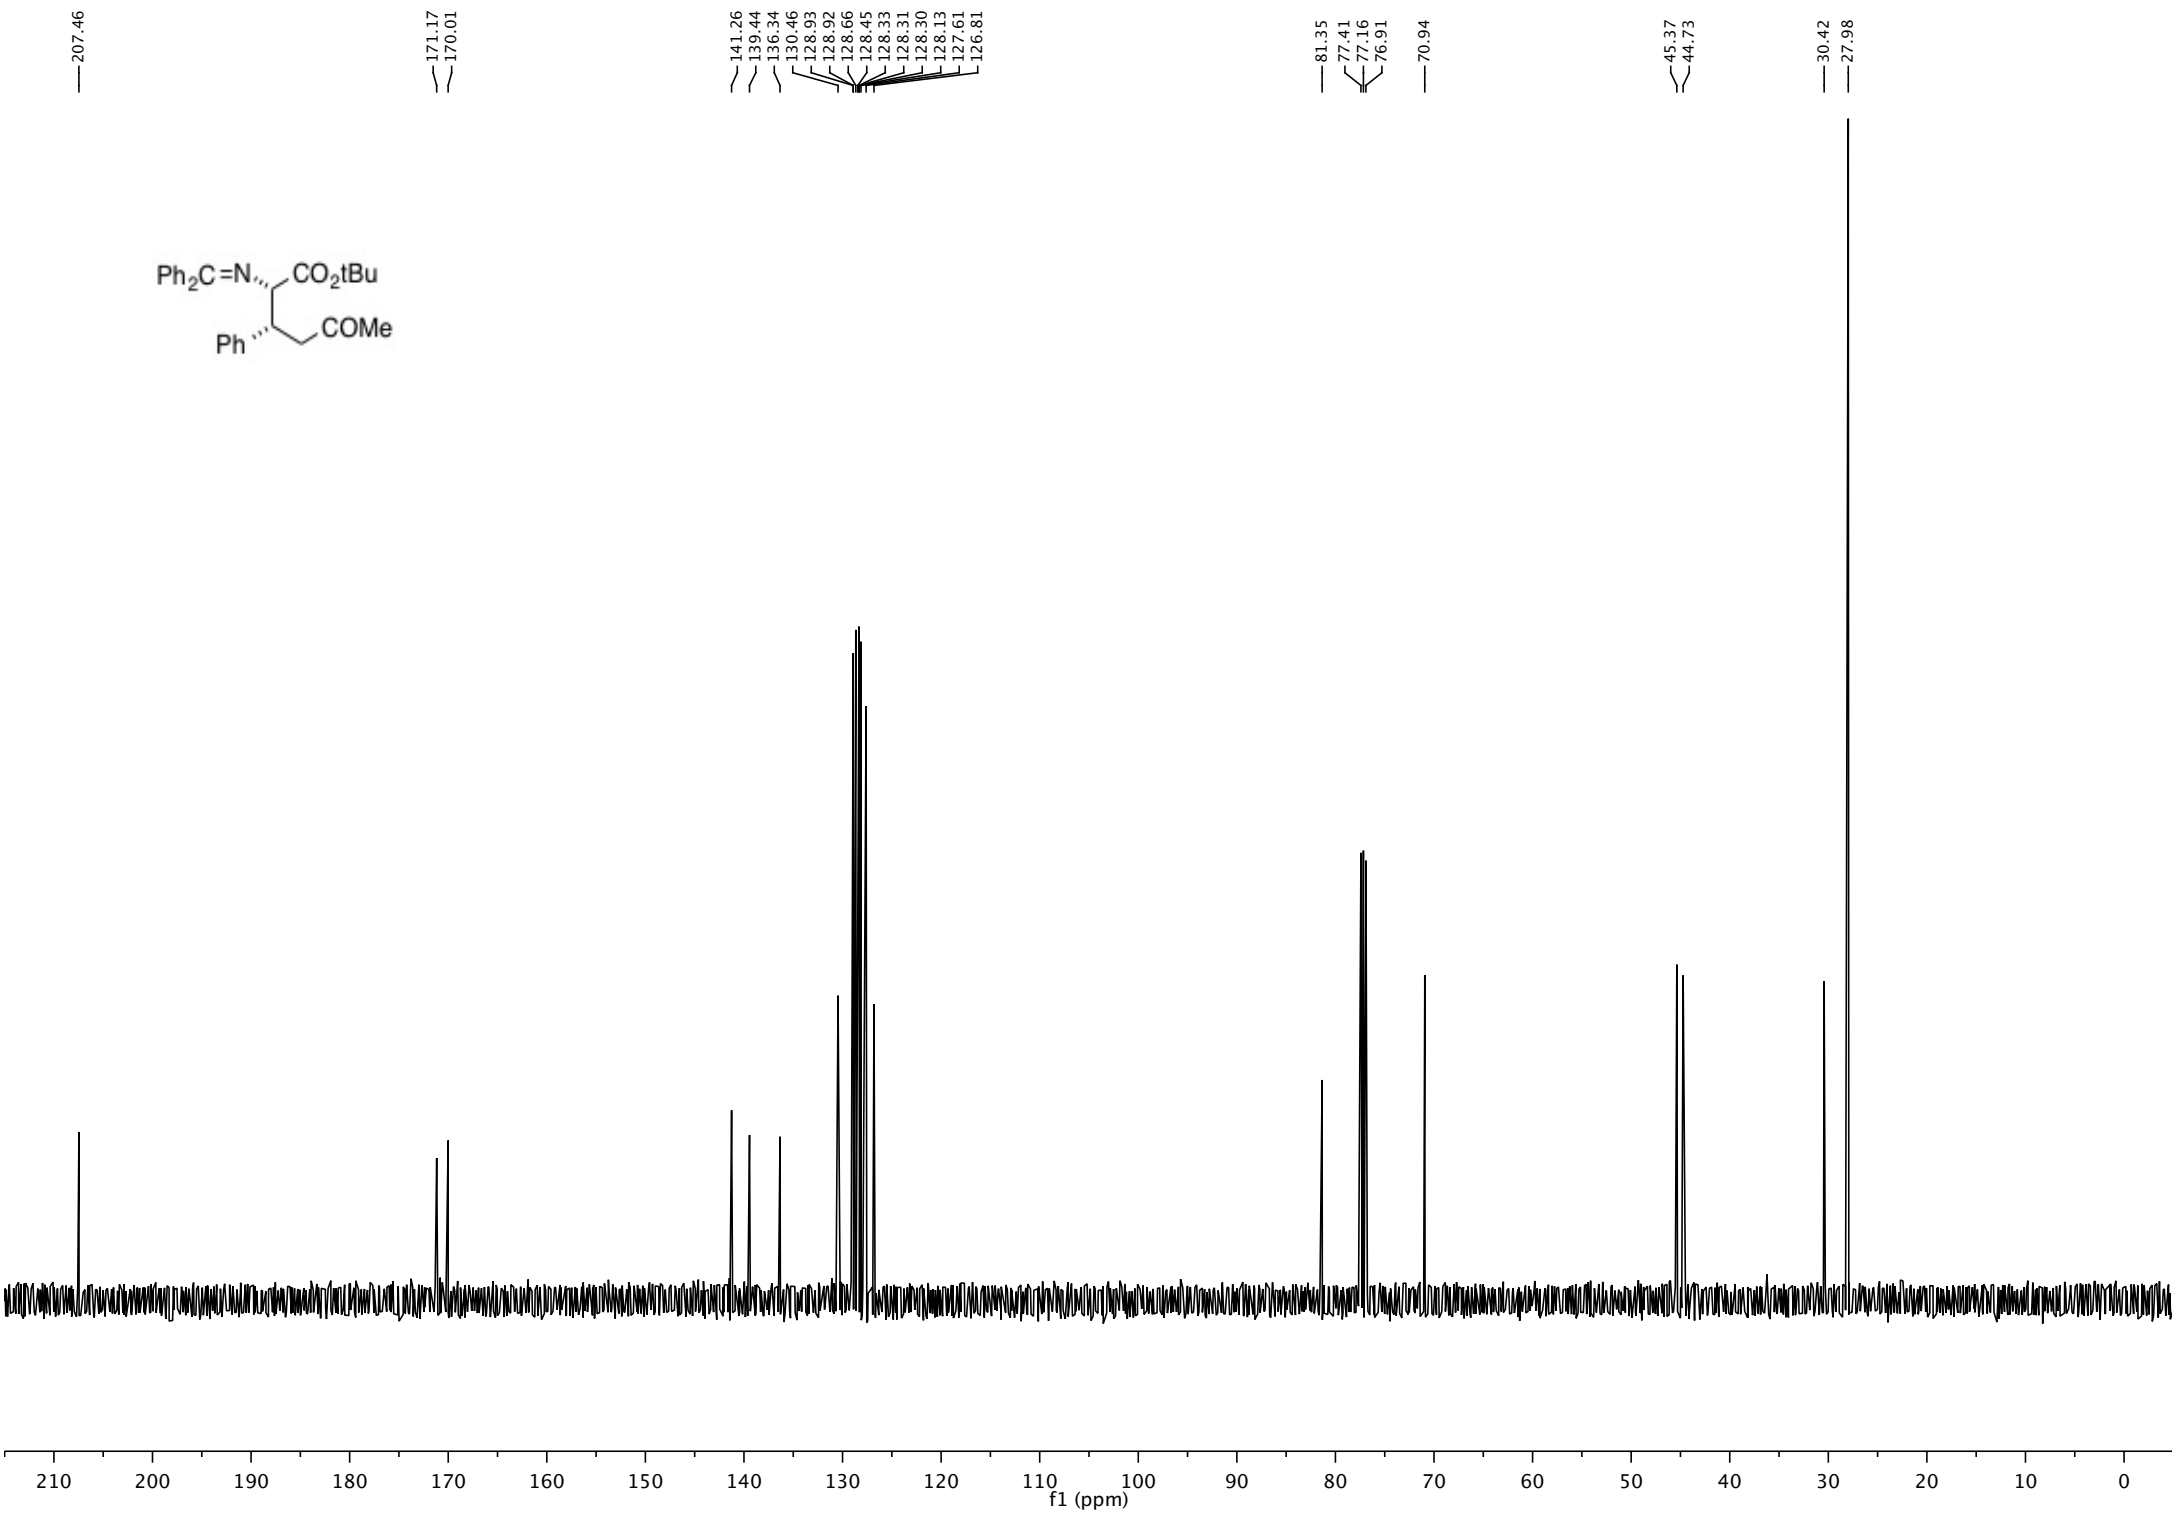



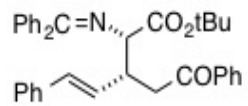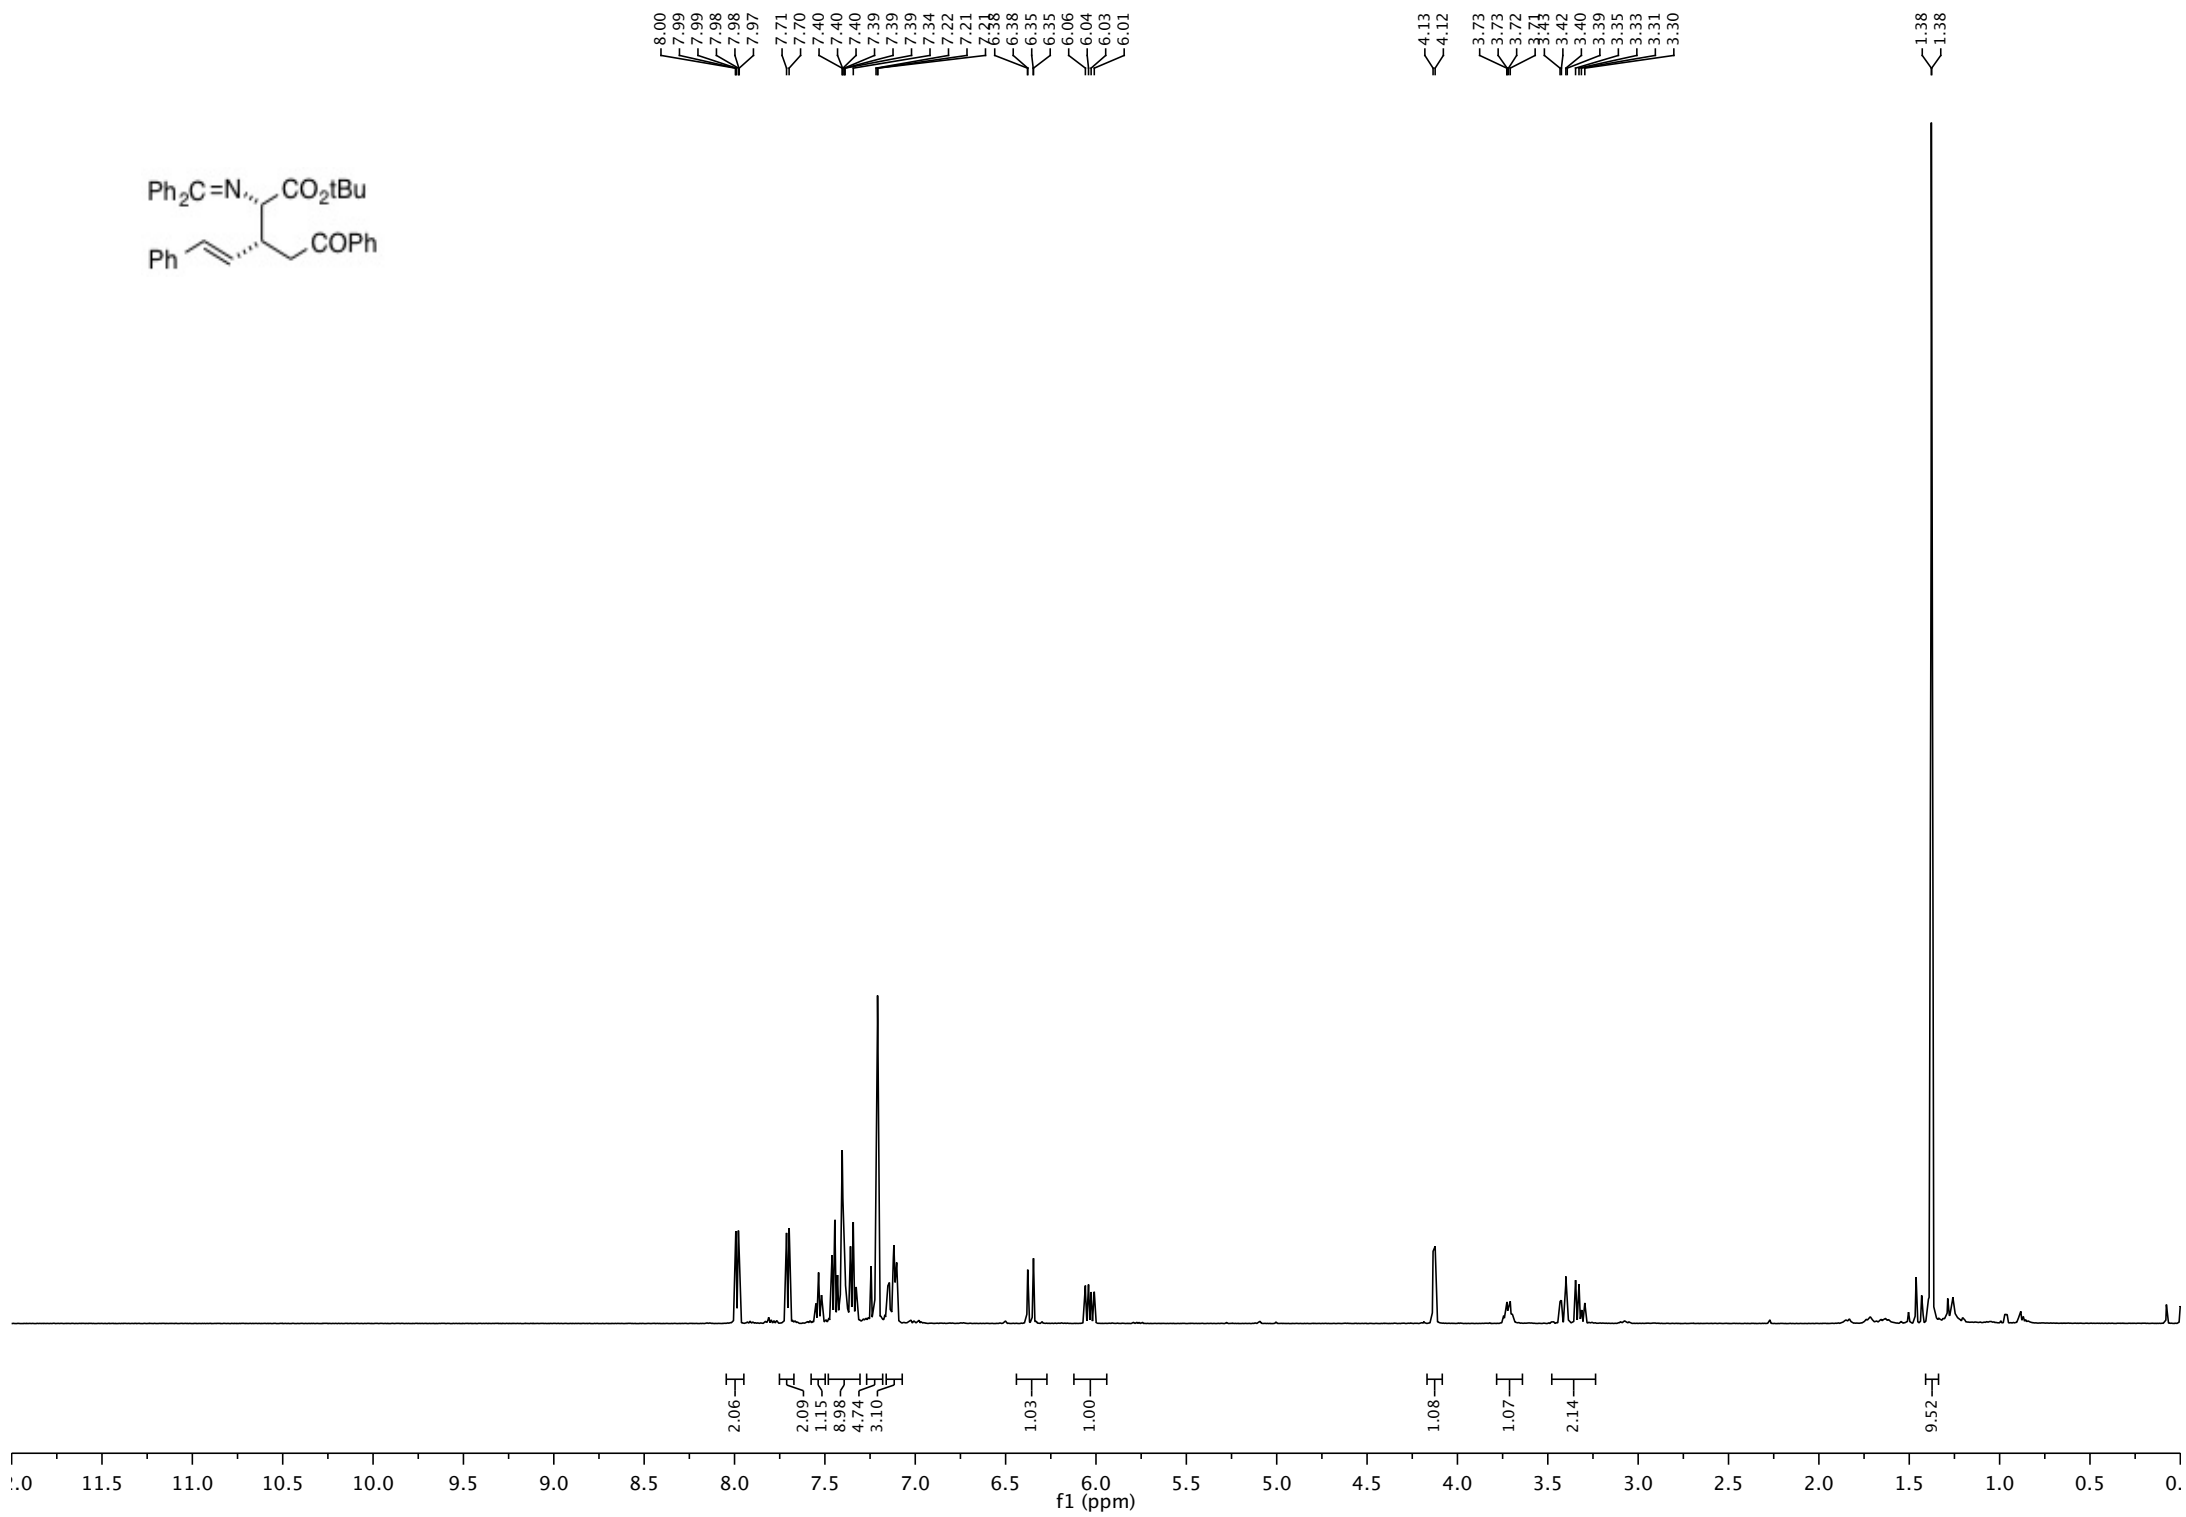

— 199.06

— 171.35  
— 170.30

— 139.57  
— 137.40  
— 137.34  
— 136.61  
— 132.97  
— 132.02  
— 130.55  
— 129.84  
— 129.03  
— 128.73  
— 128.65  
— 128.54  
— 128.47  
— 128.40  
— 128.18  
— 127.96  
— 127.25  
— 126.34

— 81.51  
— 77.41  
— 77.16  
— 76.91

— 69.87

— 43.24  
— 40.35

— 28.16

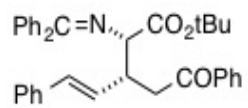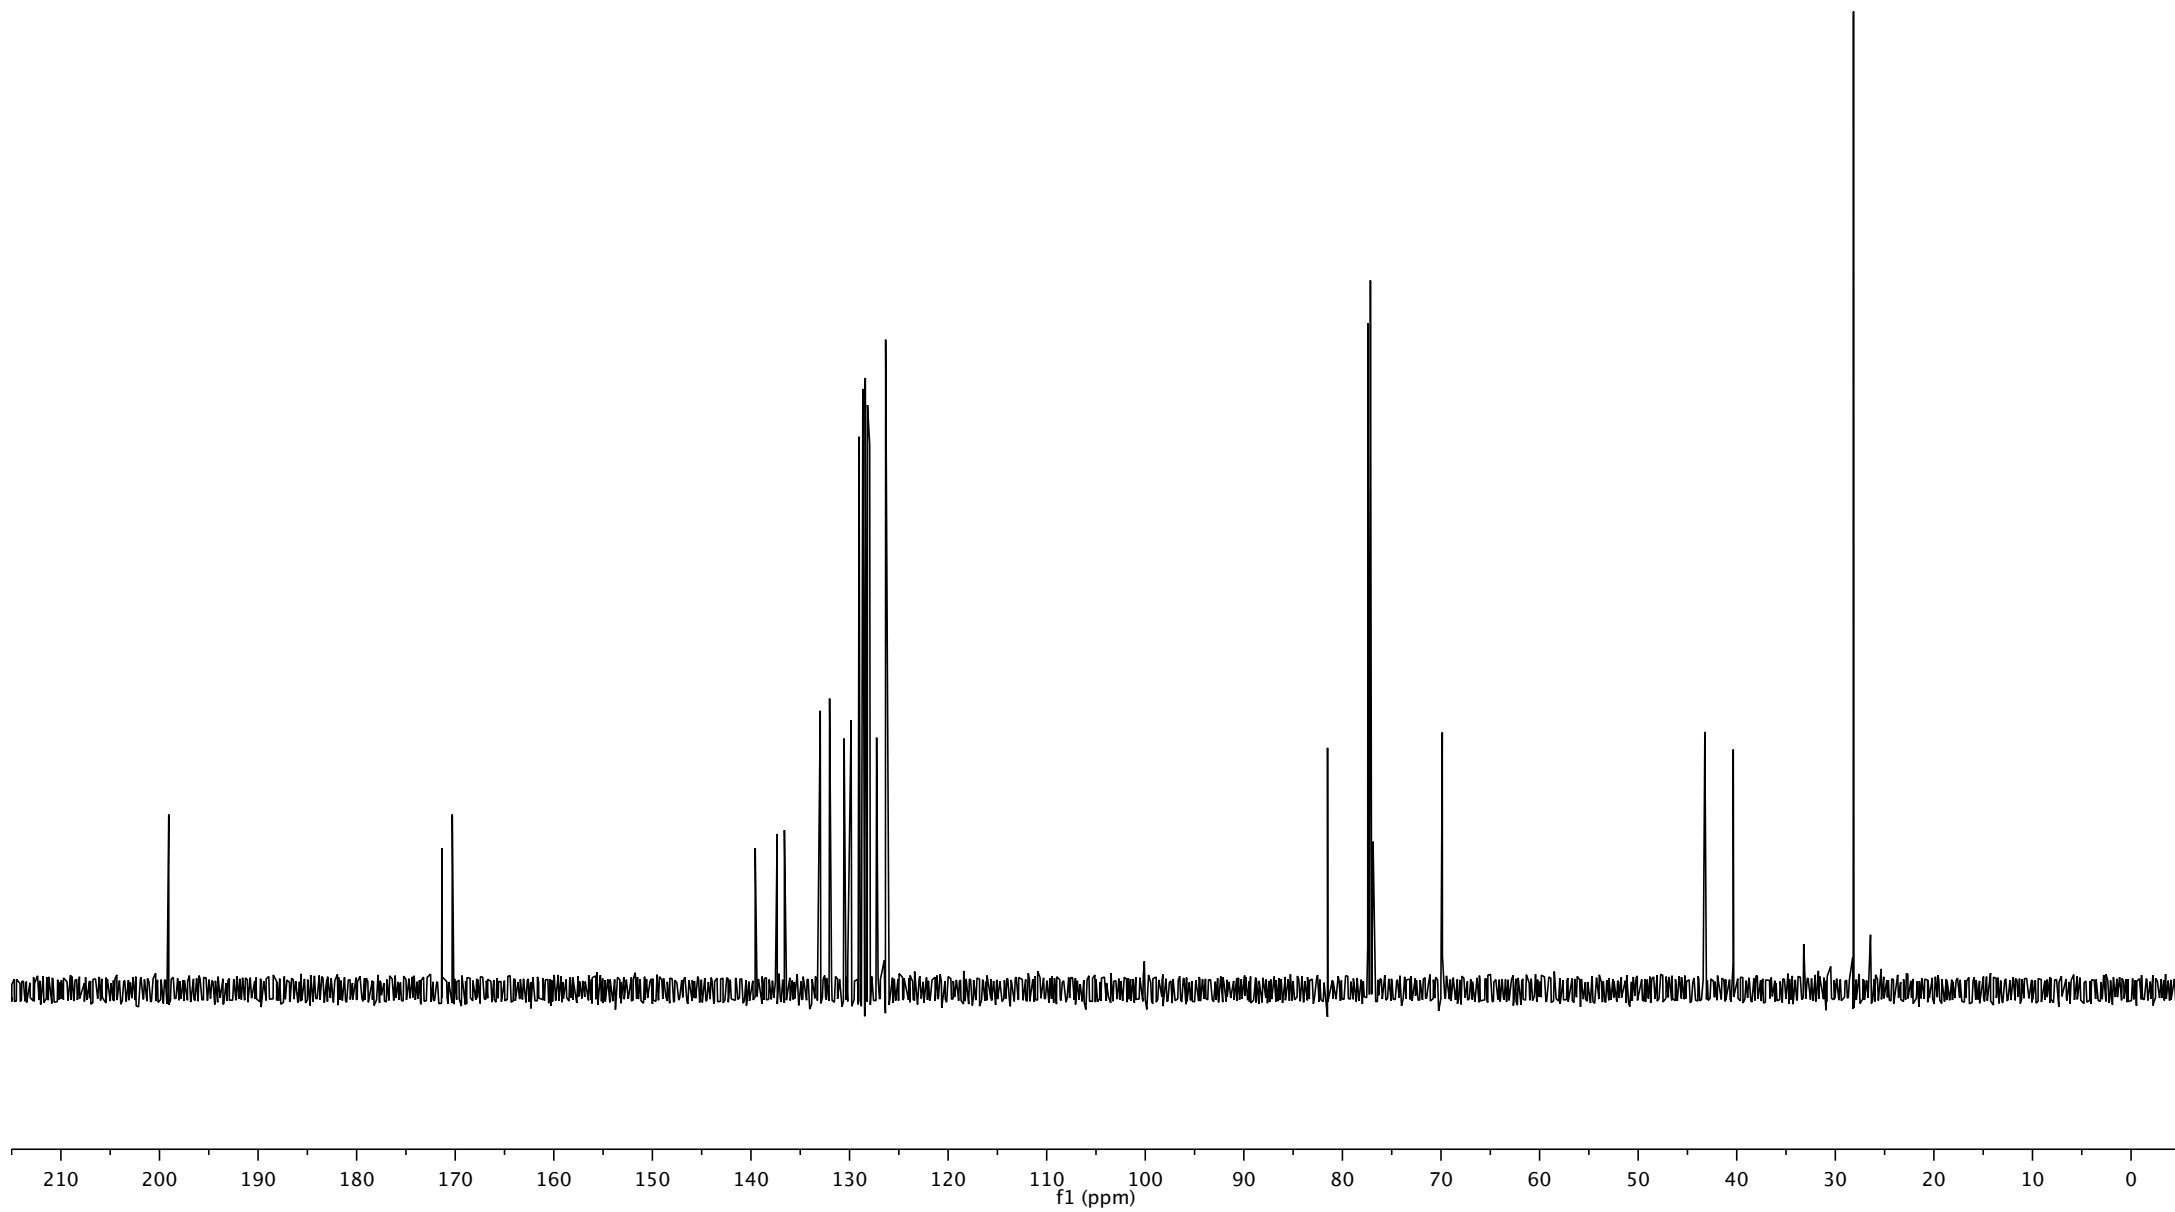

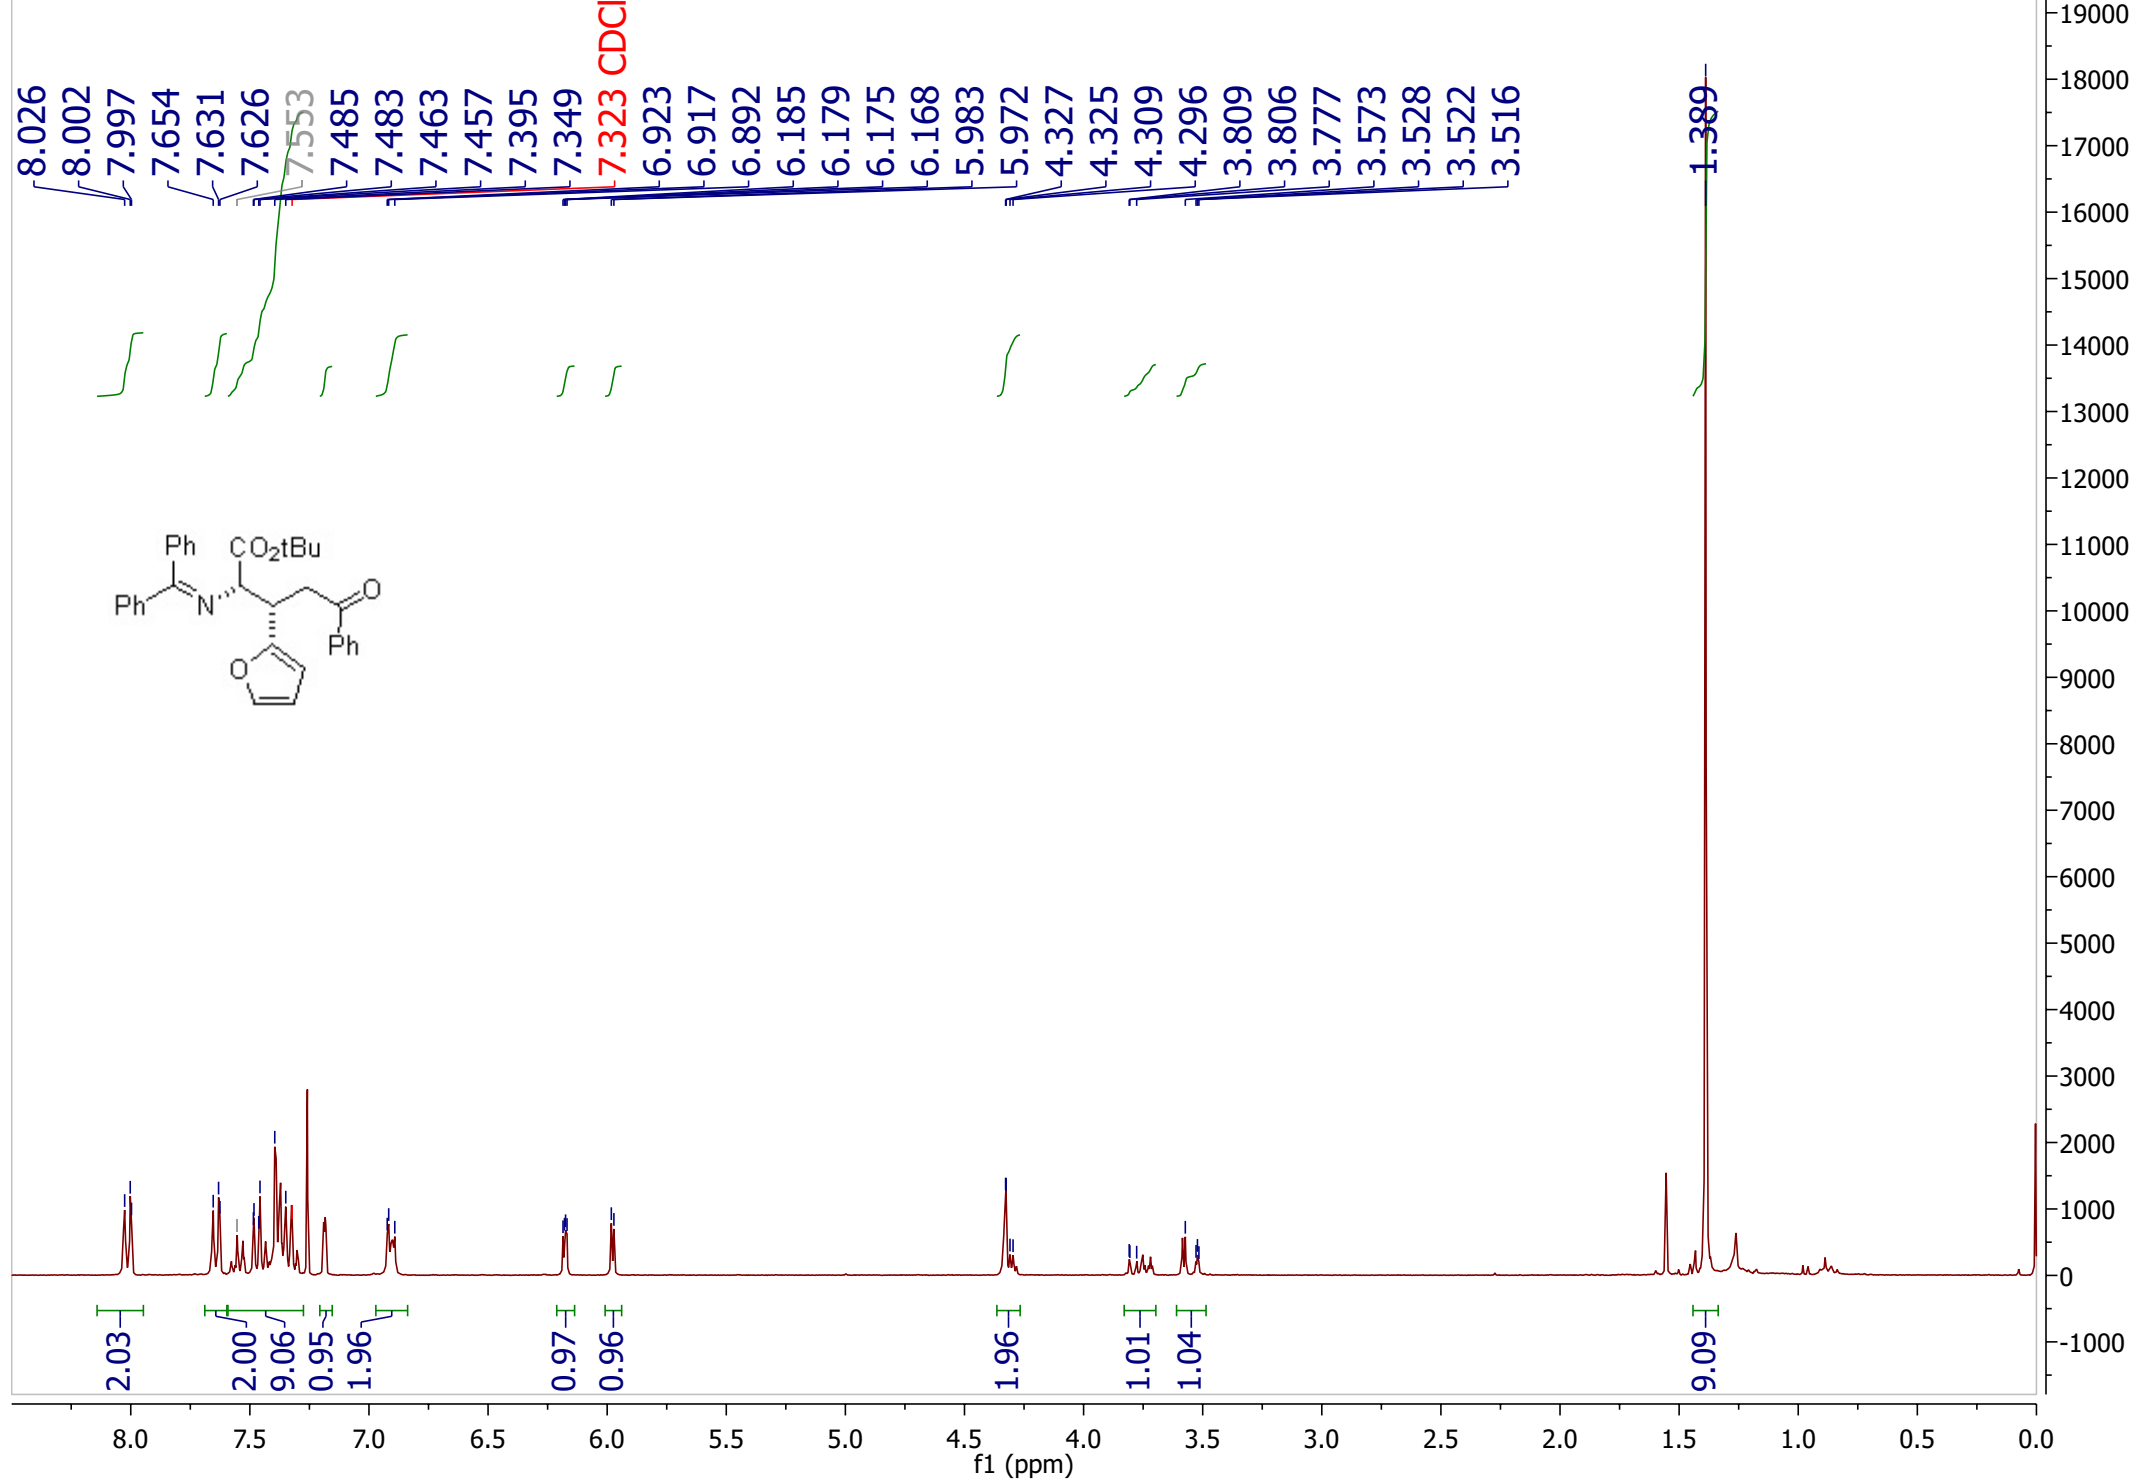

proton

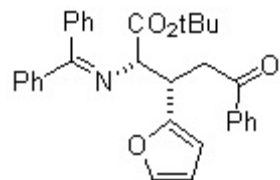

- 198.307
- 171.463
- 169.836
- 154.934
- 140.987
- 139.596
- 137.086
- 136.336
- 132.937
- 130.328
- 128.923
- 128.538
- 128.275
- 128.242
- 128.002
- 127.714
- 110.193
- 106.467
- 81.536
- 77.350
- 77.236
- 77.034
- 76.715
- 68.706
- 38.459
- 38.338
- 27.969

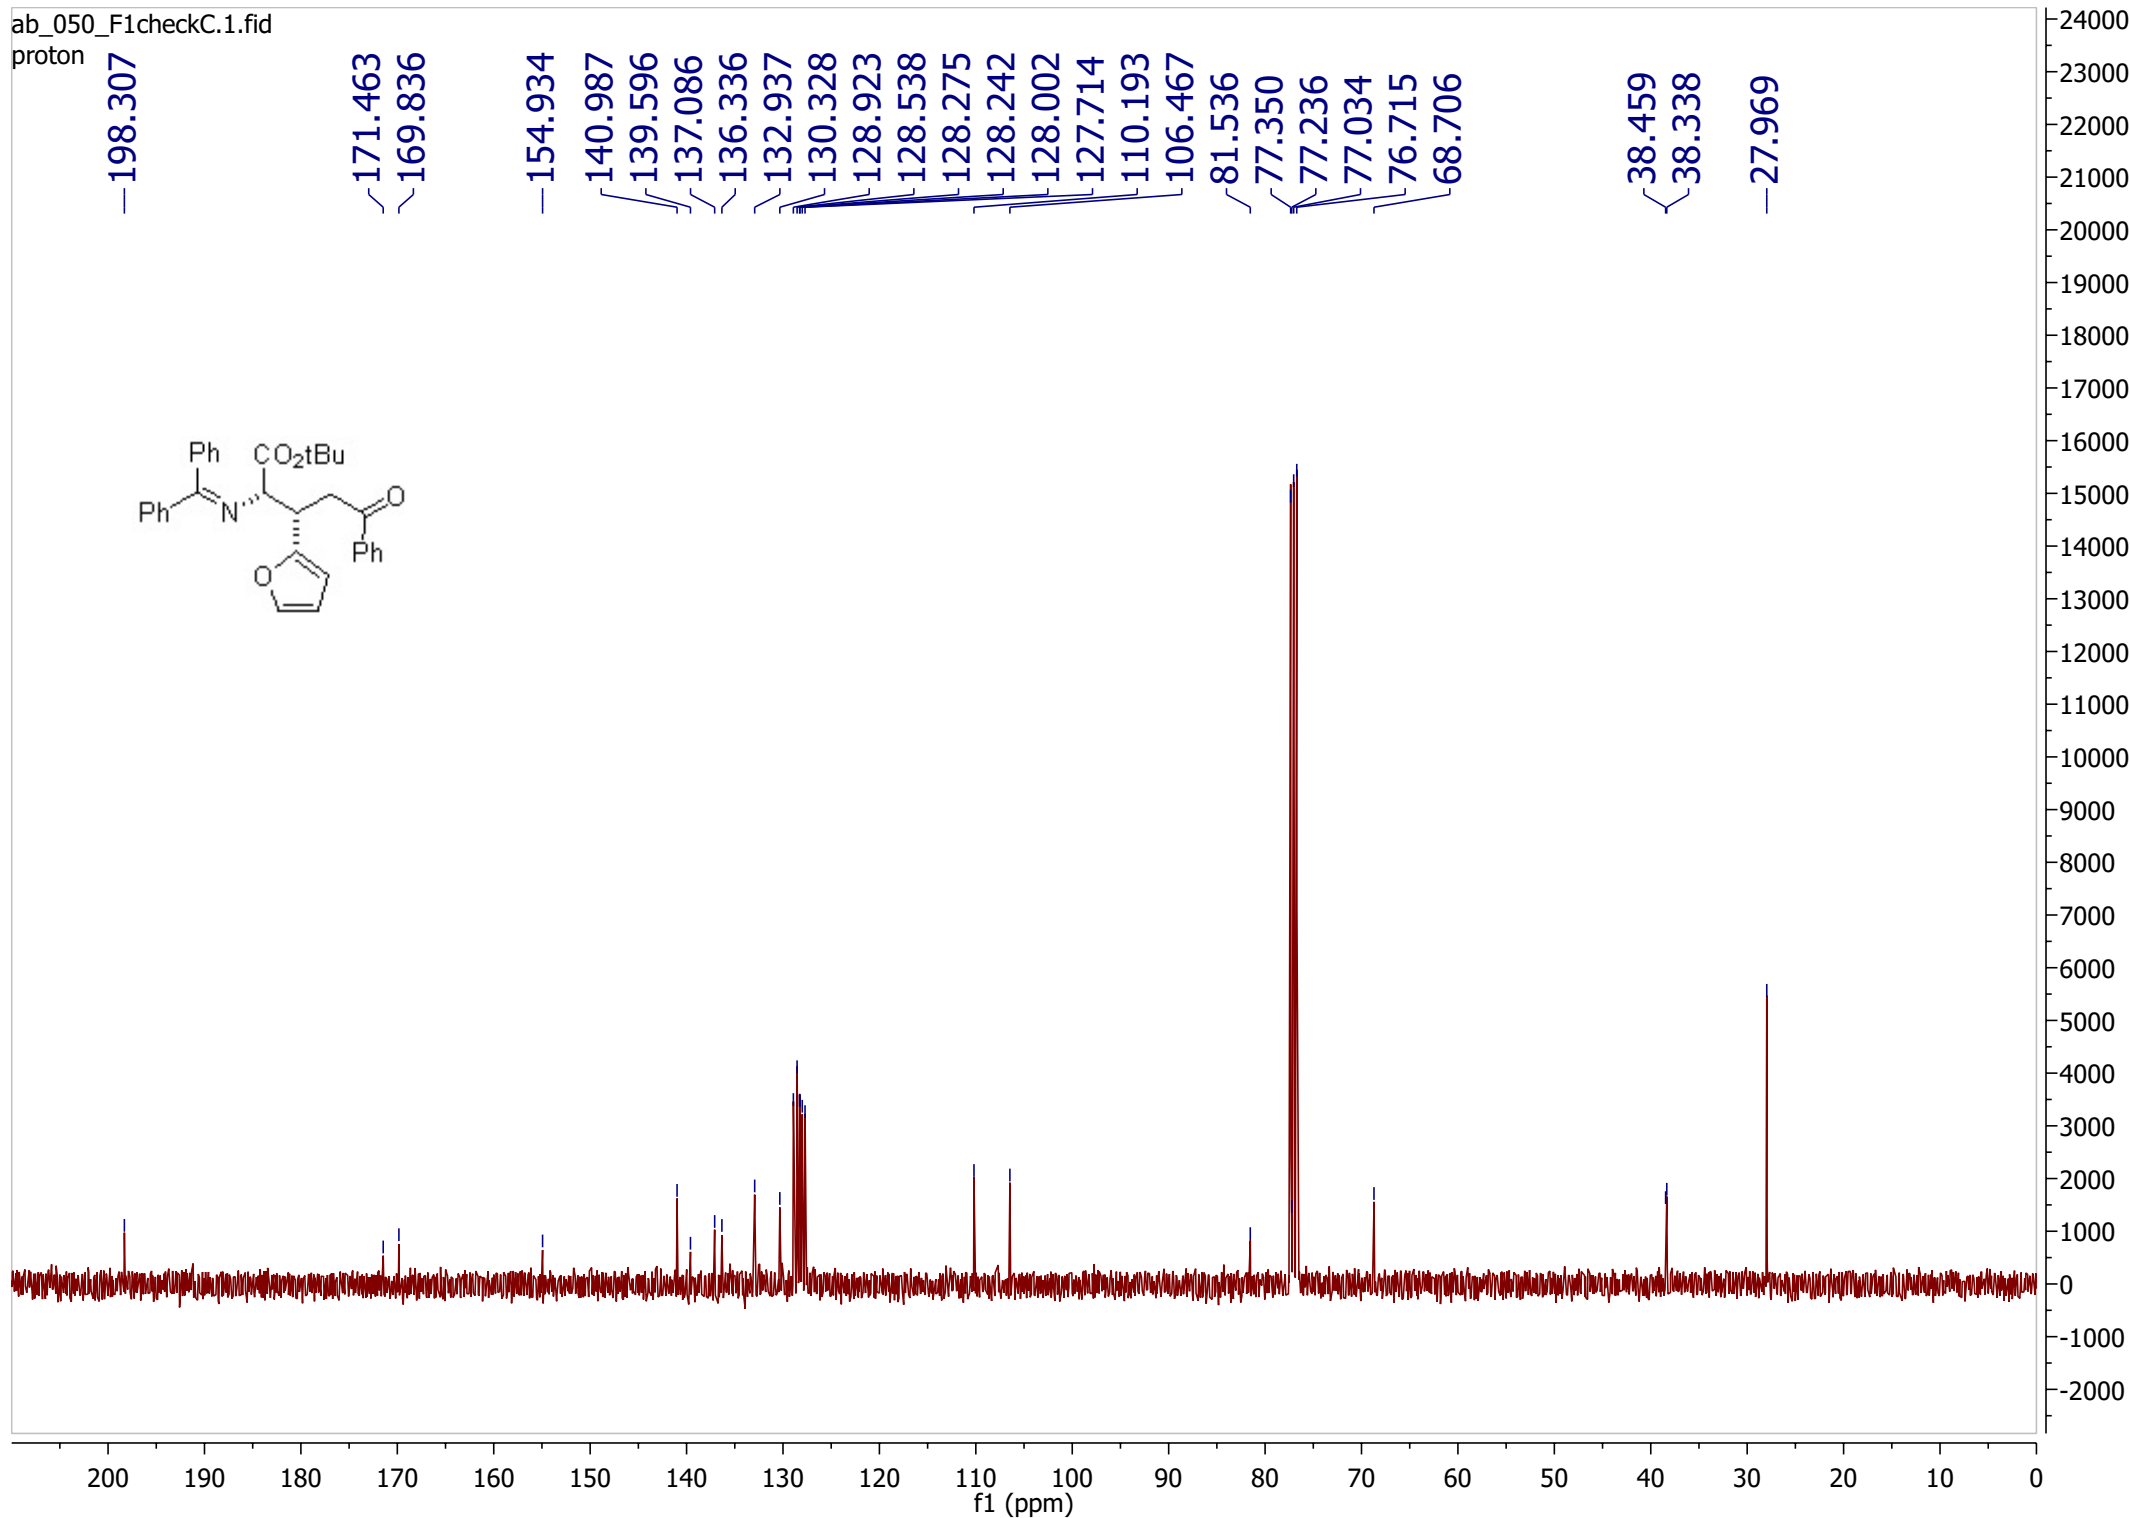

at\_057\_F1checkp\_1.f1  
proton

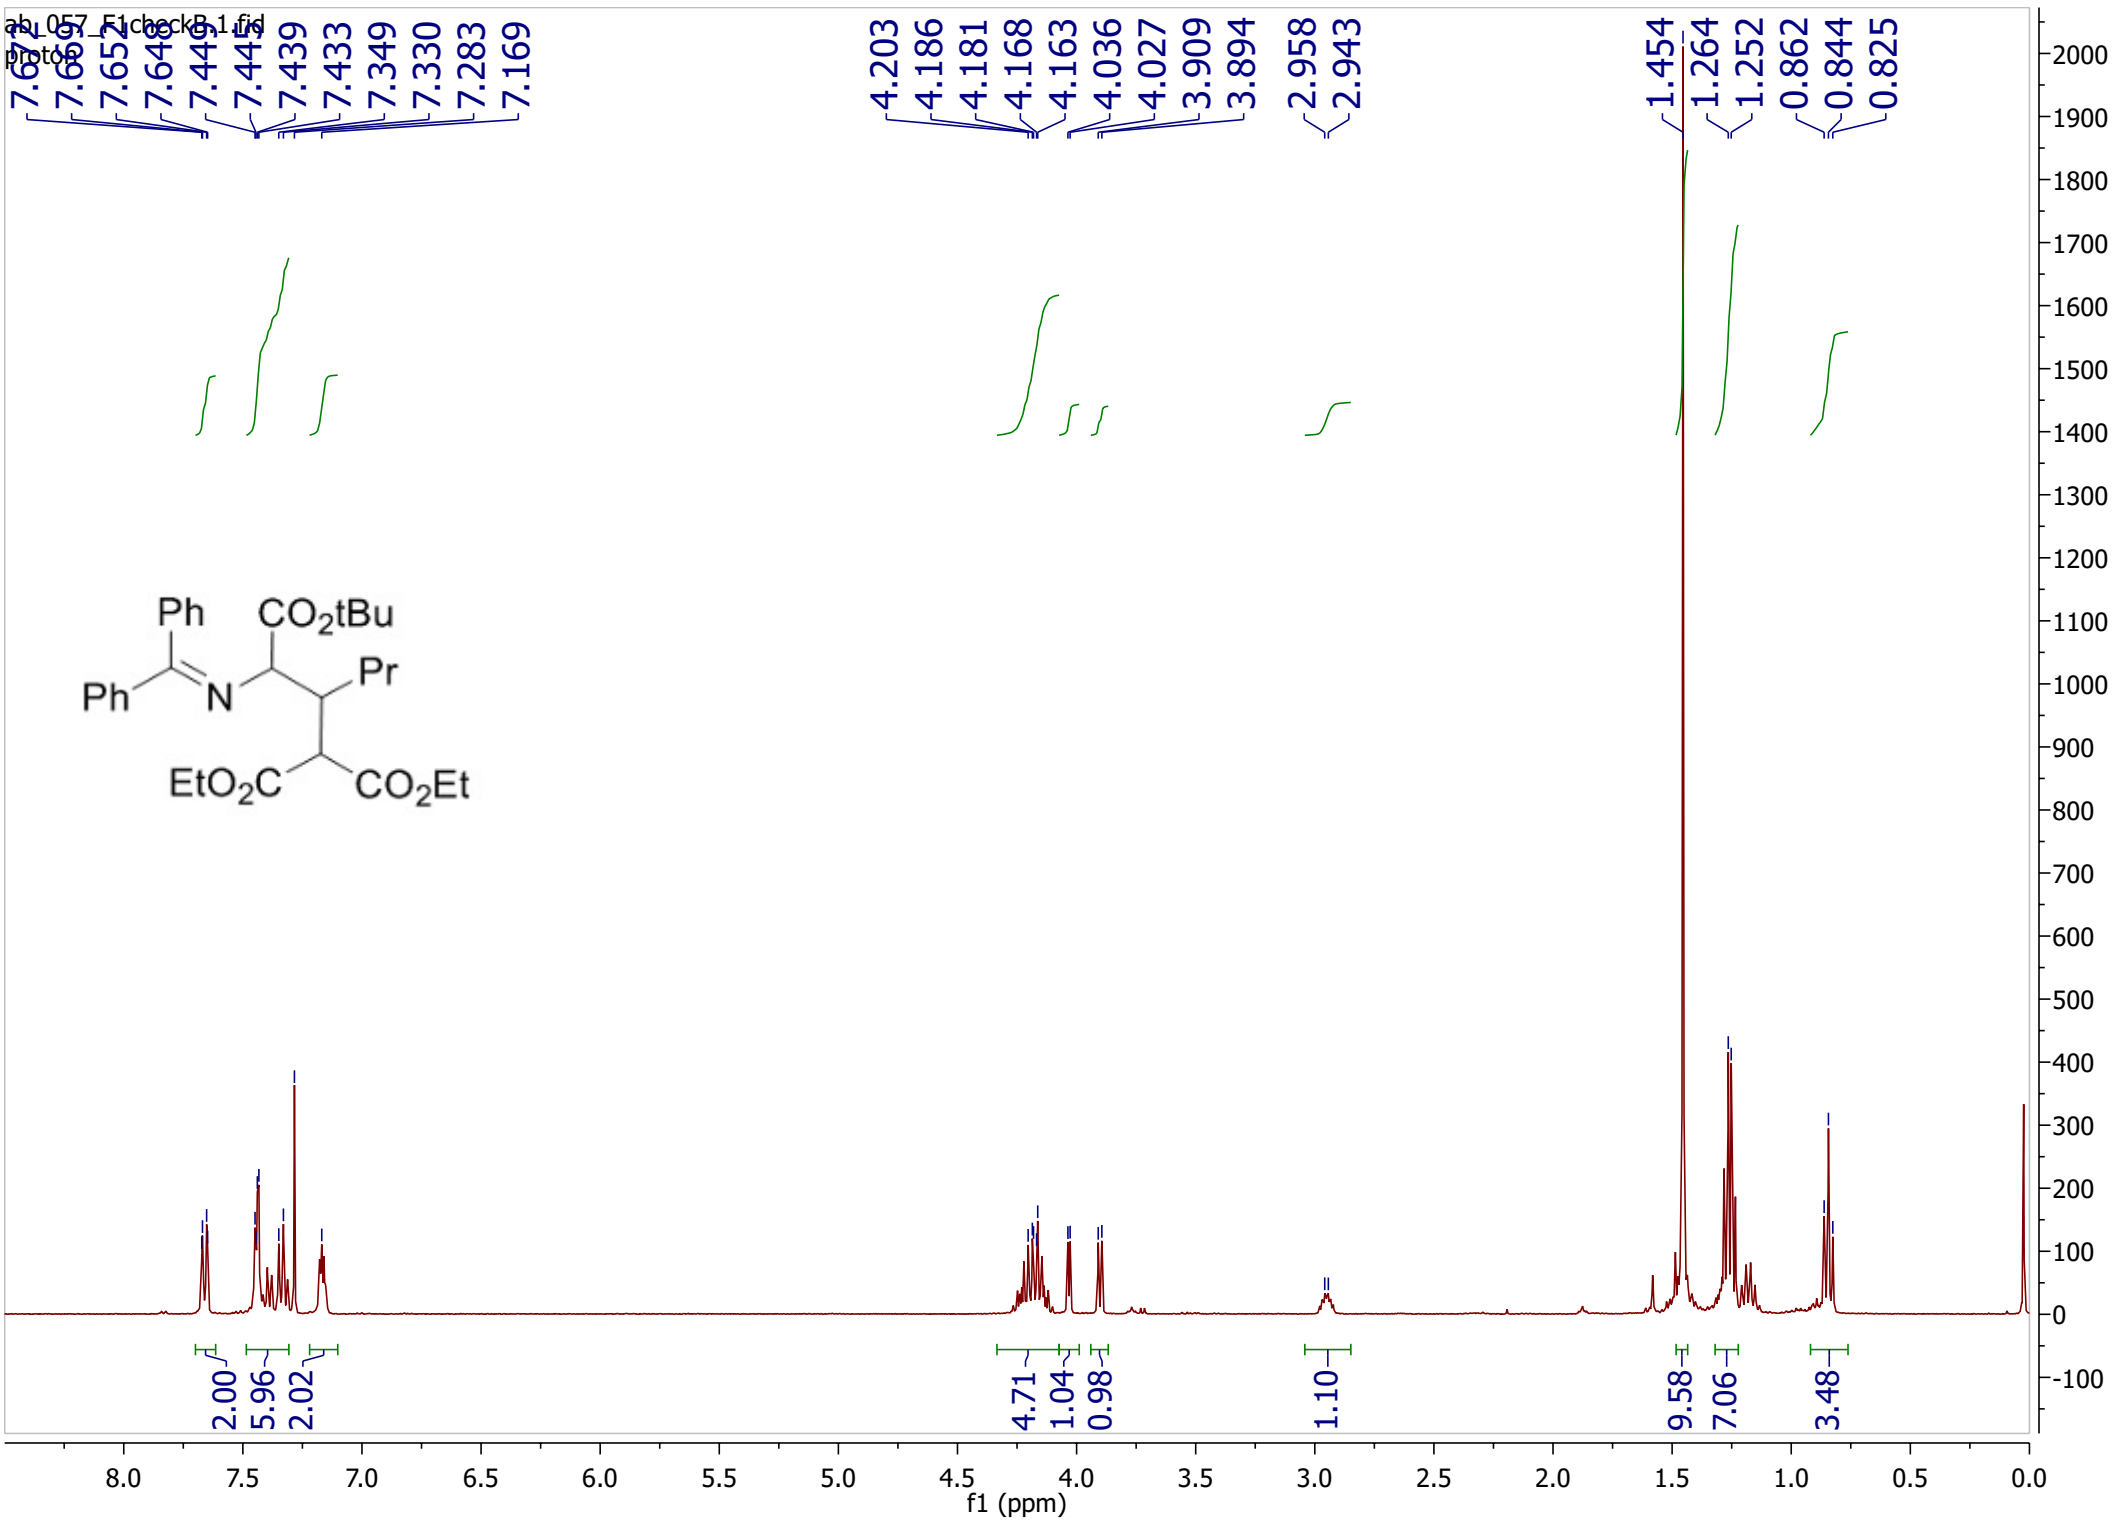

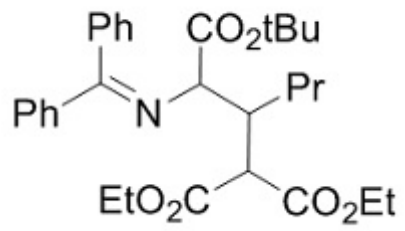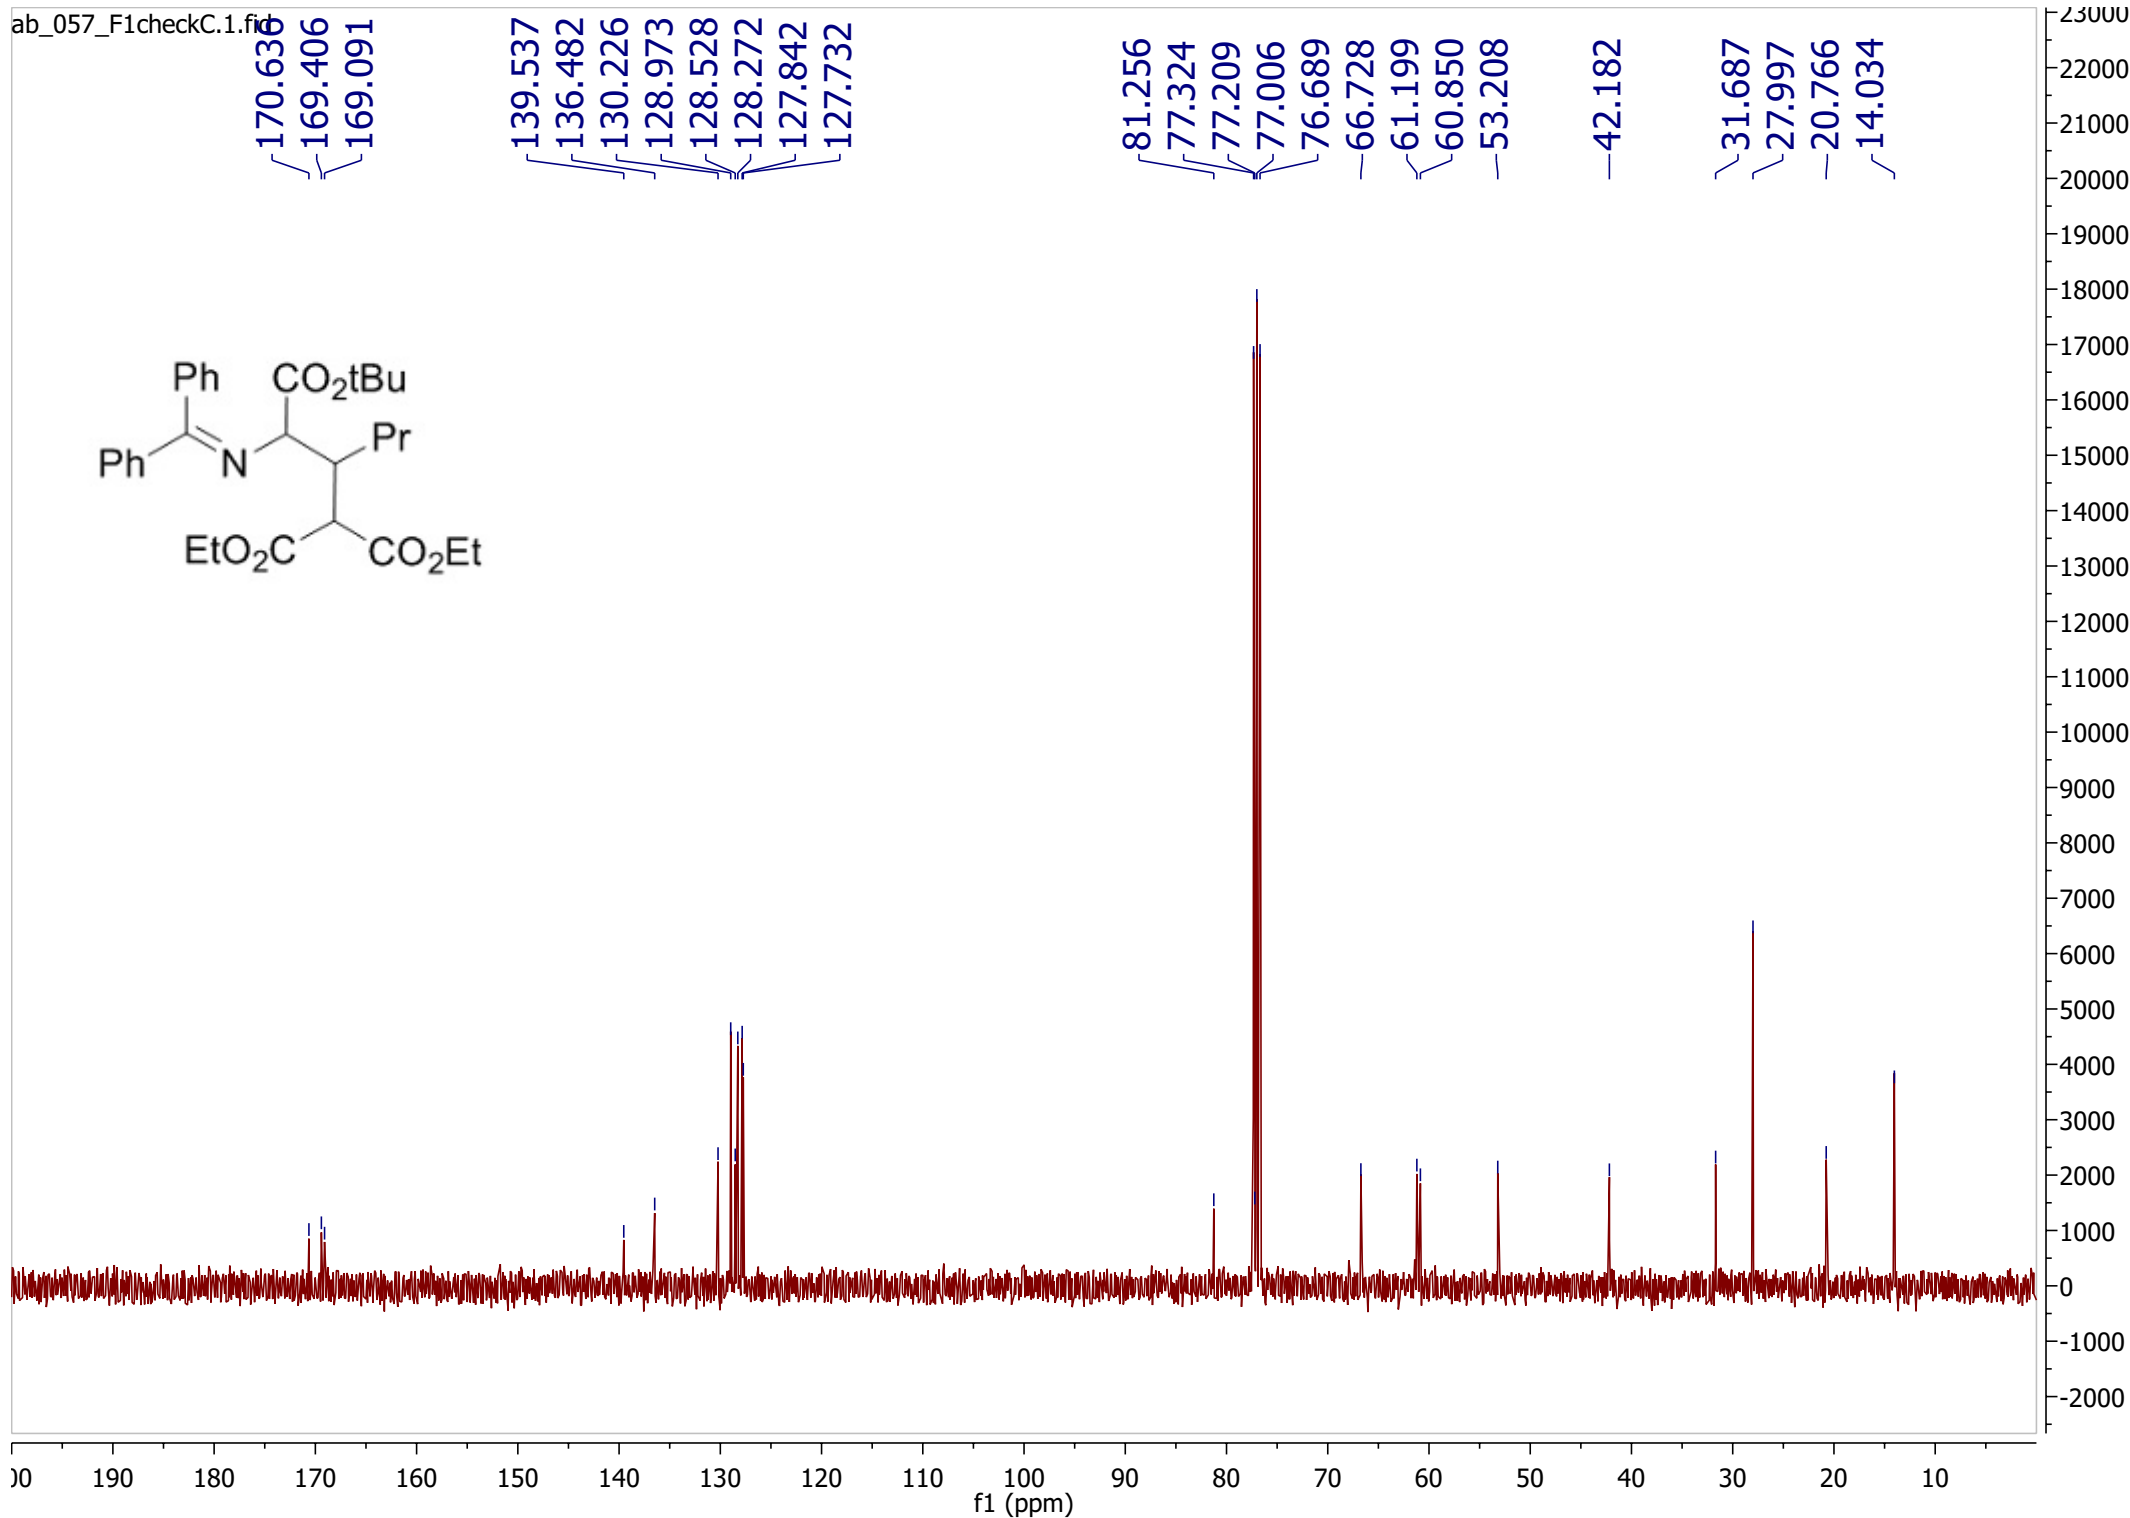

at\_062\_F1checkP\_1.f1  
Photo

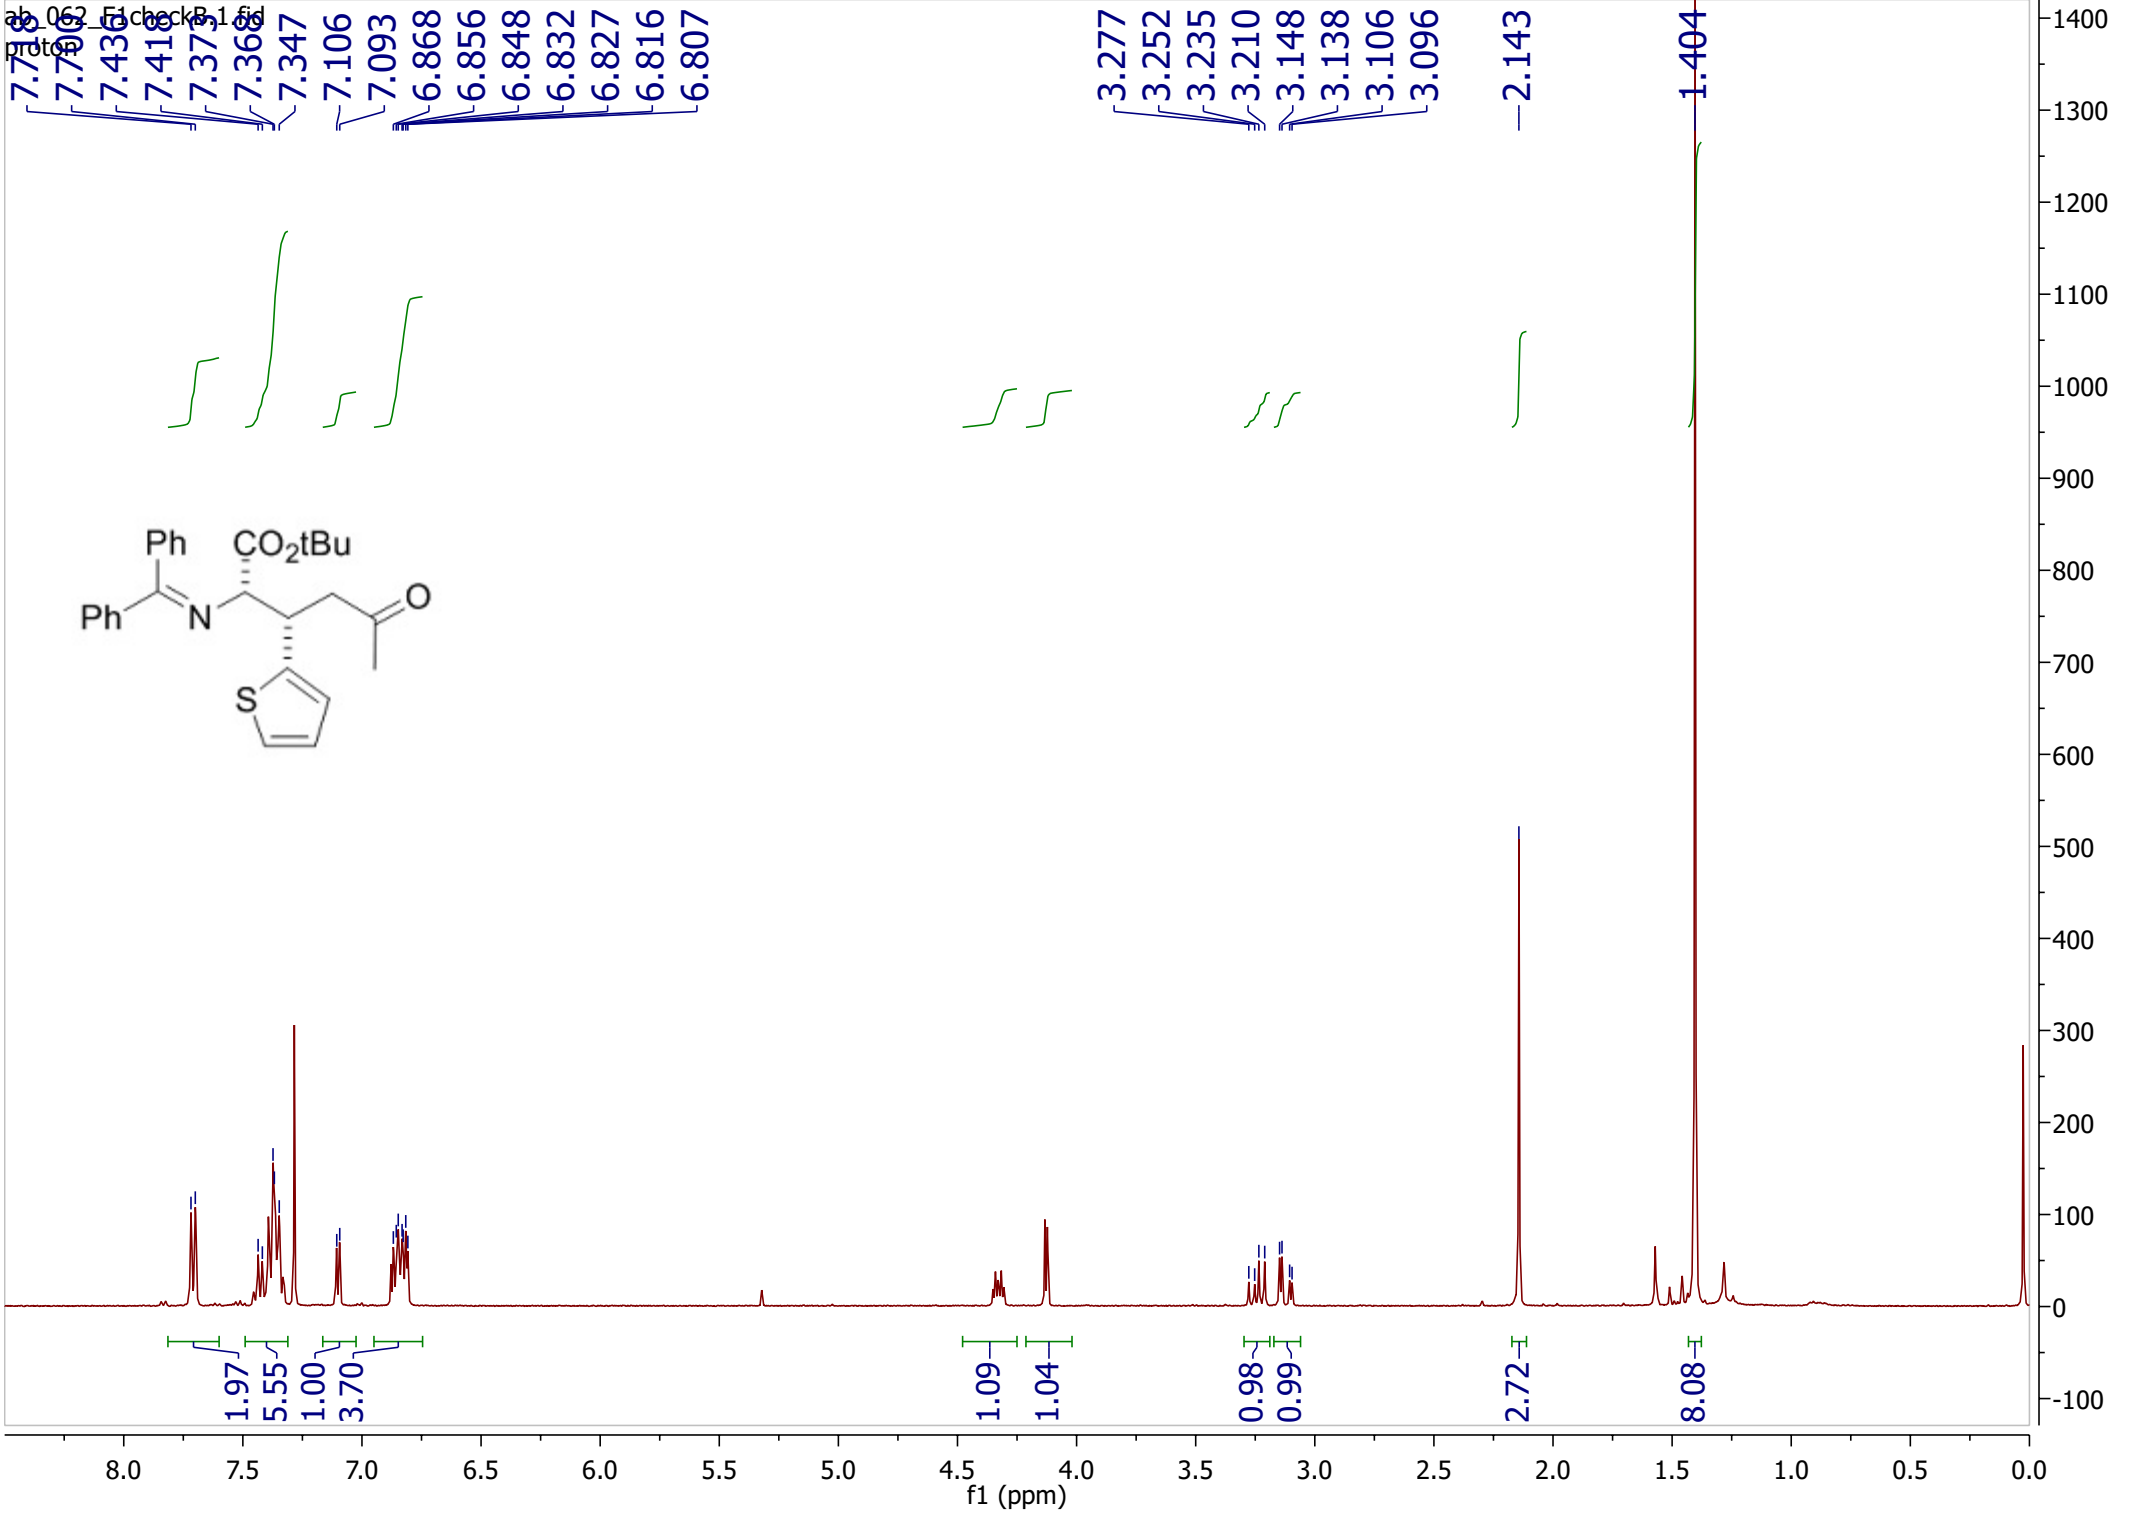

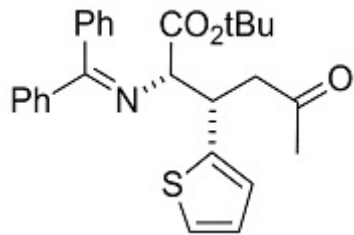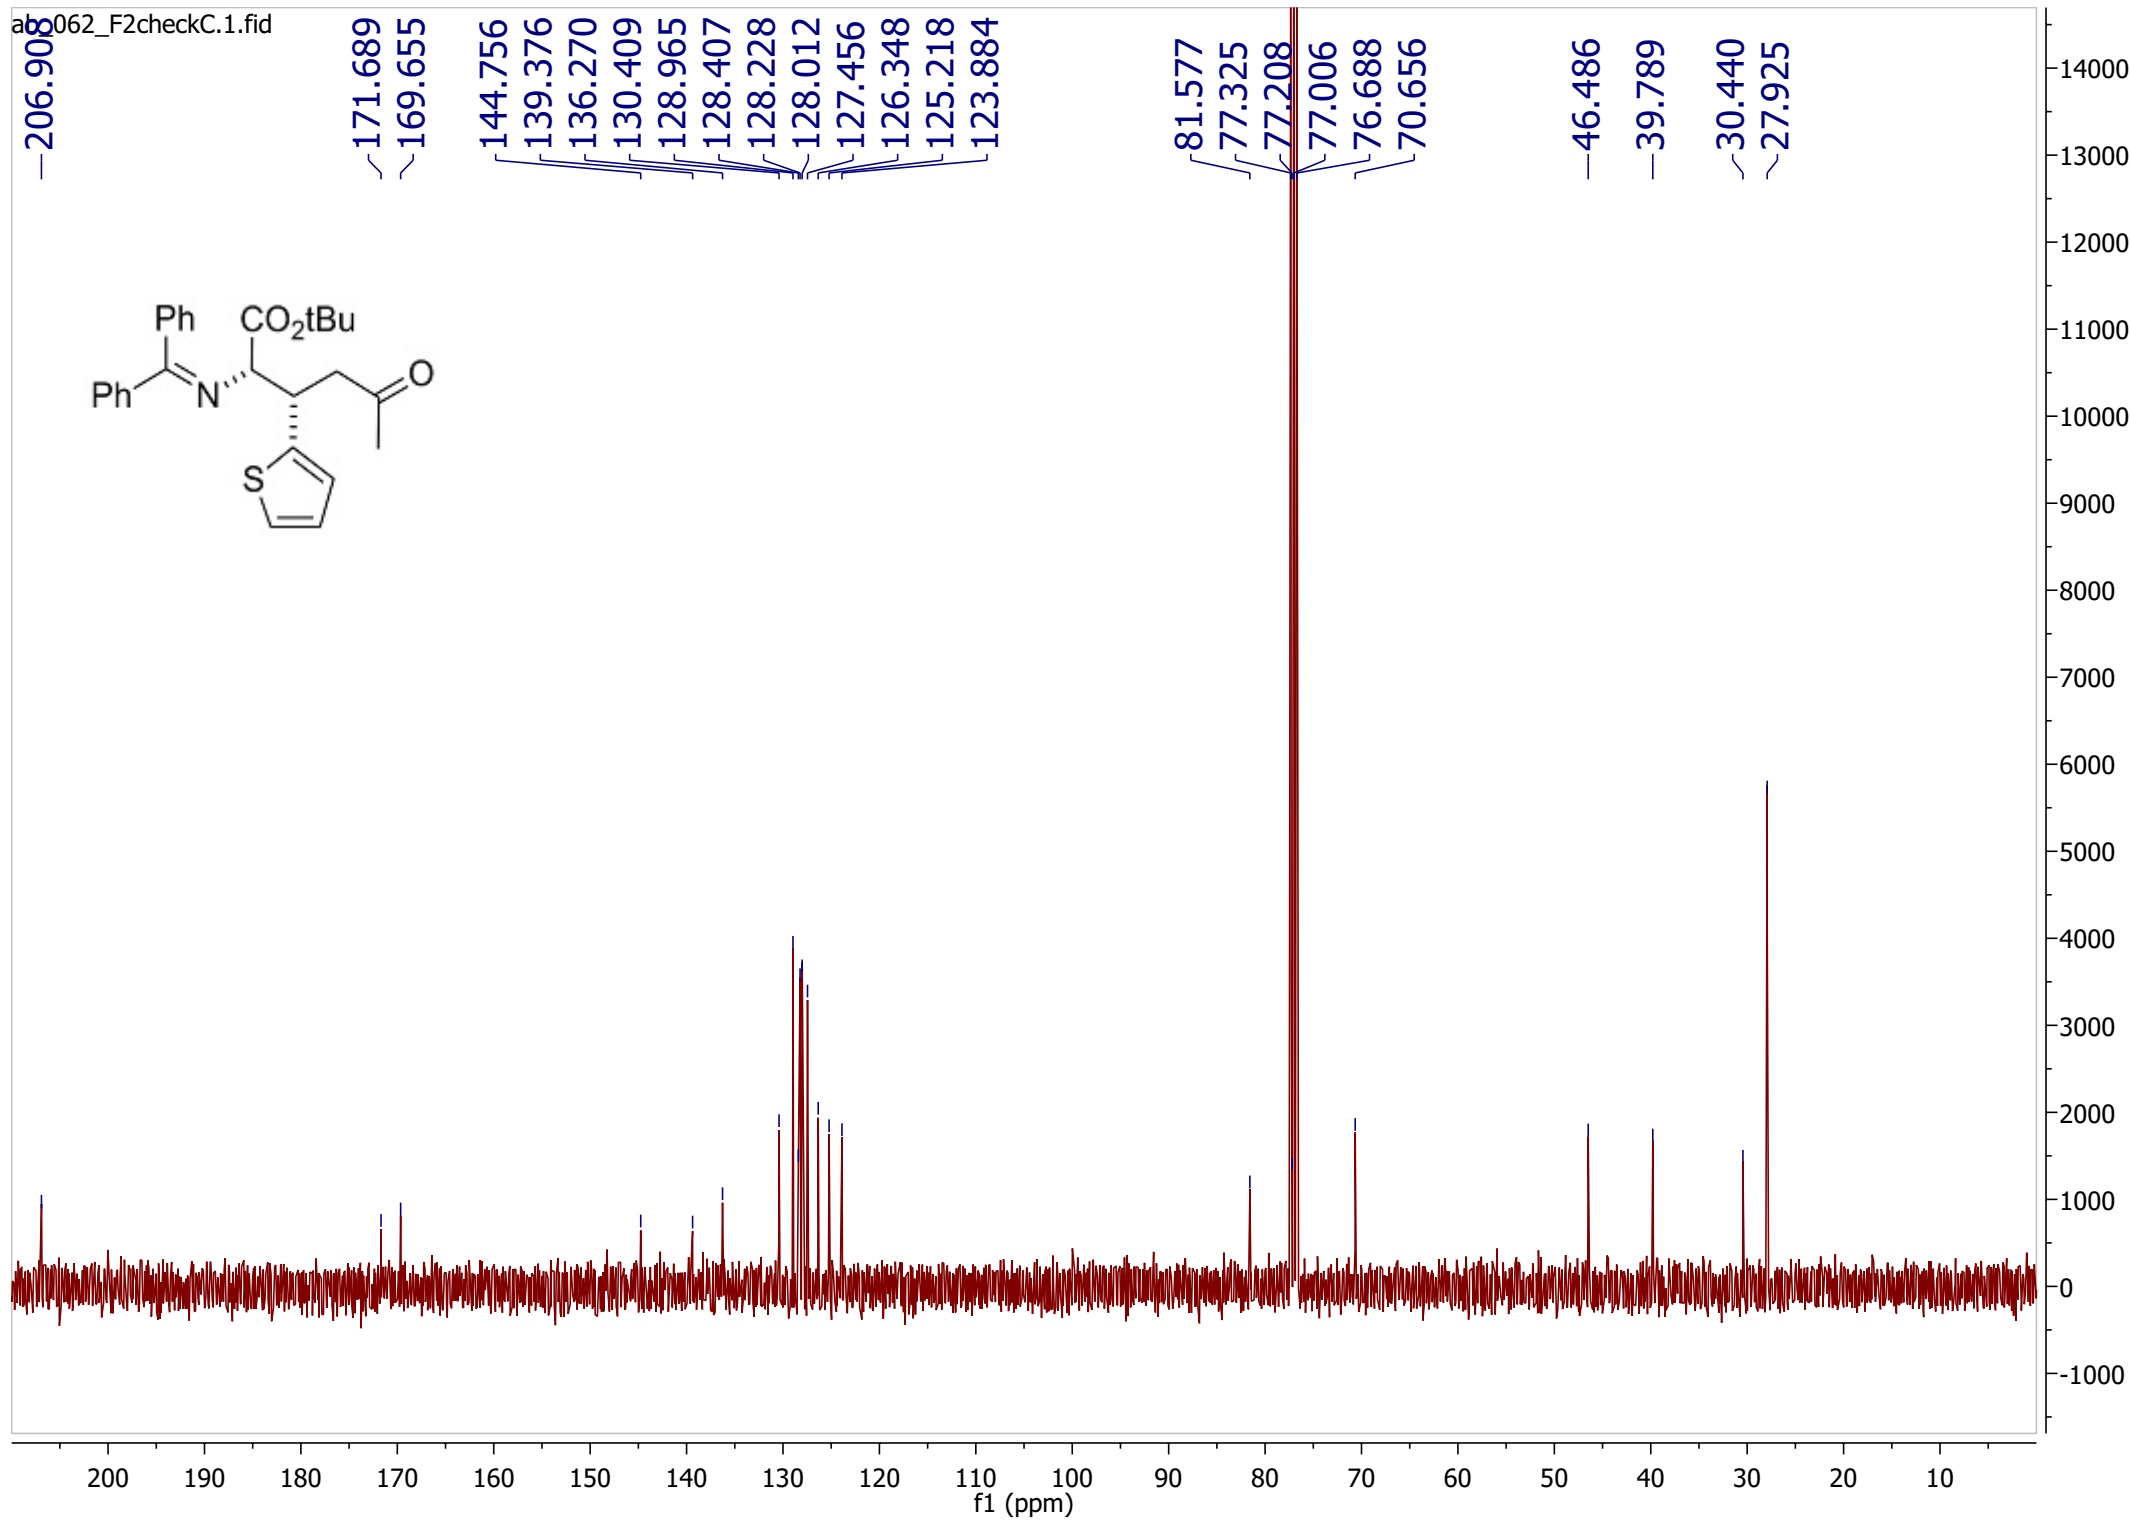



Note: For each entry, the top HPLC trace is a racemic sample that was prepared using standard conditions and a cyclopropenimine catalyst lacking a chiral substituent.

Equation 5, **19**. Hexanes/iPrOH 97/3, 1 mL/min, 254 nm, OD-H.

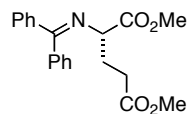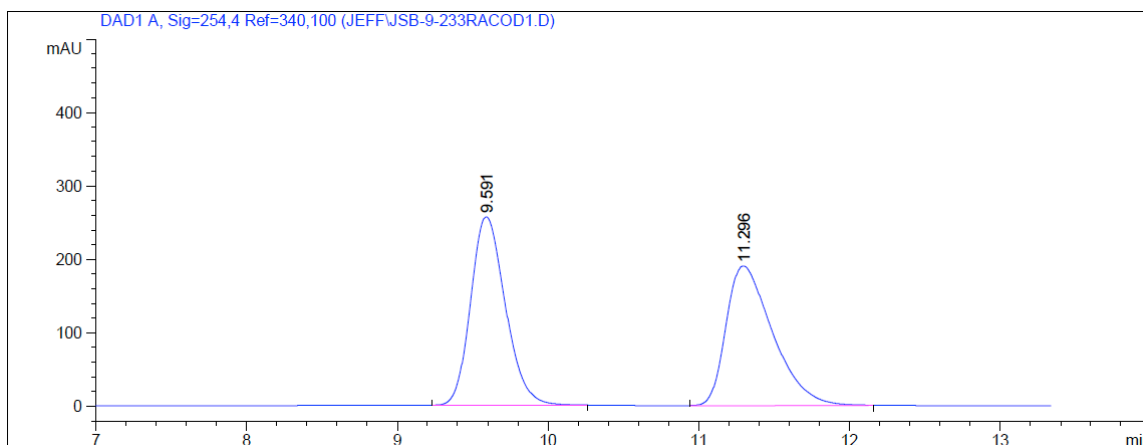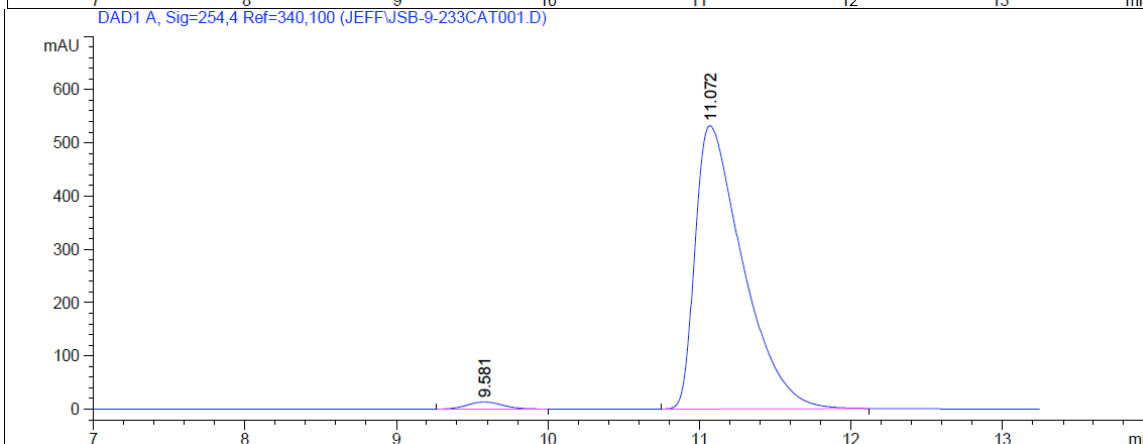

| Peak # | RetTime [min] | Sig | Type | Area [mAU*s] | Height [mAU] | Area %  |
|--------|---------------|-----|------|--------------|--------------|---------|
| 1      | 9.581         | 1   | BB   | 220.26395    | 13.59522     | 1.8606  |
| 2      | 11.072        | 1   | BB   | 1.16180e4    | 531.61310    | 98.1394 |

Equation 5, 20. Hexanes/iPrOH 97/3, 1 mL/min, 254 nm, OD-H.

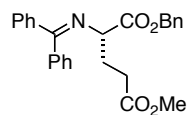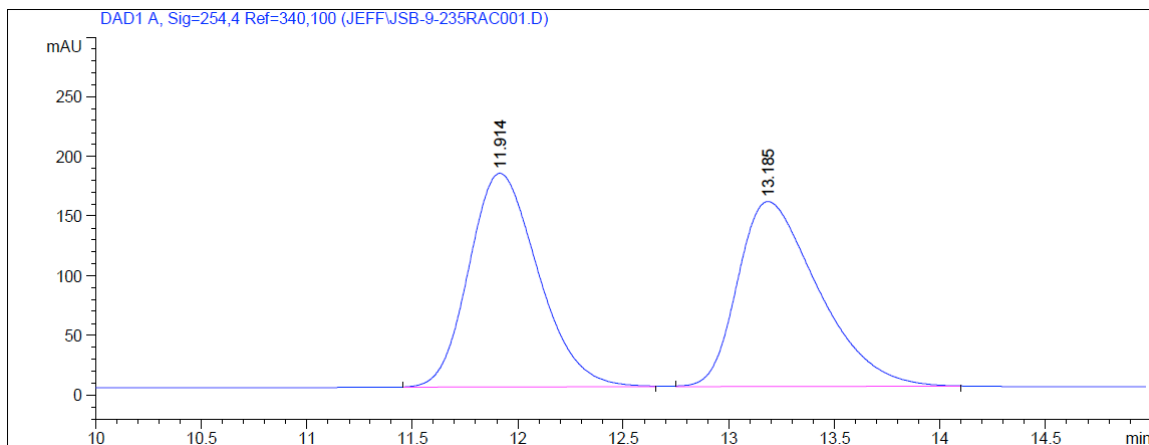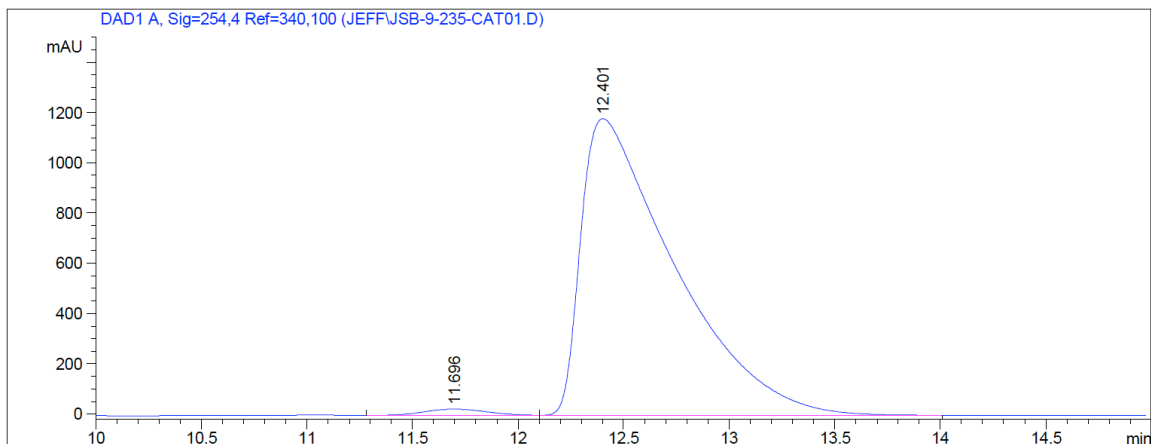

| Peak # | RetTime [min] | Sig | Type | Area [mAU*s] | Height [mAU] | Area %  |
|--------|---------------|-----|------|--------------|--------------|---------|
| 1      | 11.696        | 1   | VV   | 541.52197    | 25.60269     | 1.4679  |
| 2      | 12.401        | 1   | VB   | 3.63491e4    | 1180.74292   | 98.5321 |

Equation 5, **22**. Hexanes/iPrOH 98/2, 0.8 mL/min, 254 nm, OD-H.

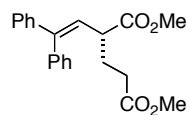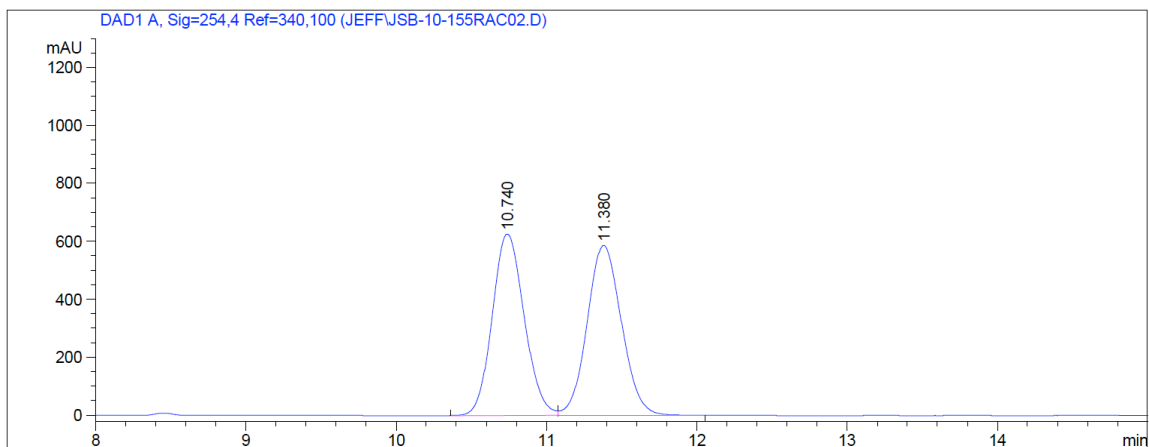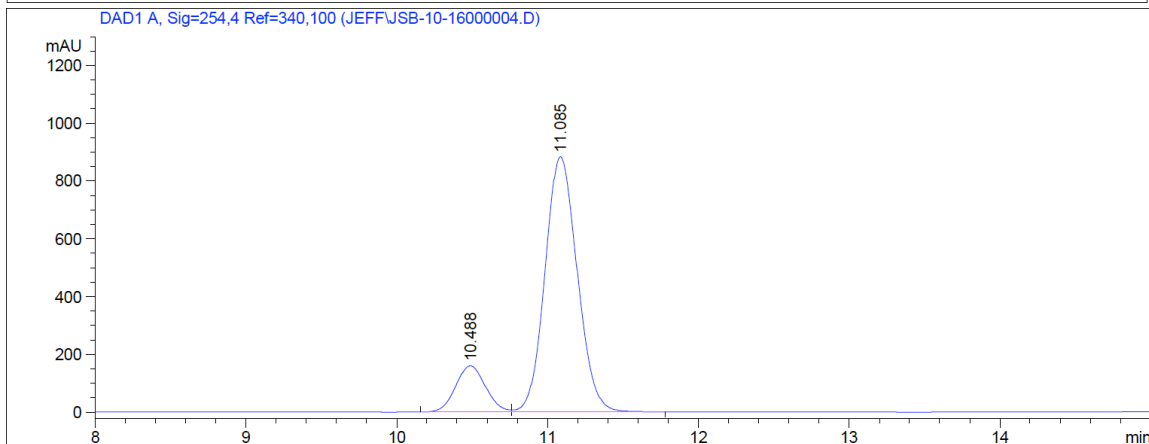

| Peak # | RetTime [min] | Sig | Type | Area [mAU*s] | Height [mAU] | Area %  |
|--------|---------------|-----|------|--------------|--------------|---------|
| 1      | 10.488        | 1   | BV   | 2213.77783   | 160.14494    | 14.4041 |
| 2      | 11.085        | 1   | VB   | 1.31553e4    | 882.94867    | 85.5959 |

Equation 5, **21**. Hexanes/iPrOH 98.5/1.5, 0.7 mL/min, 254 nm, OD-H.

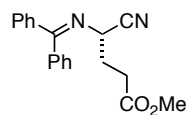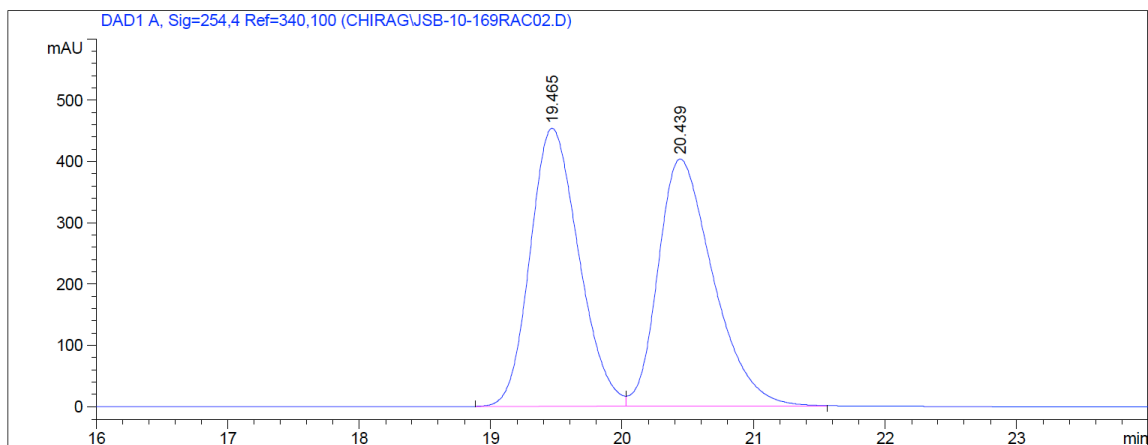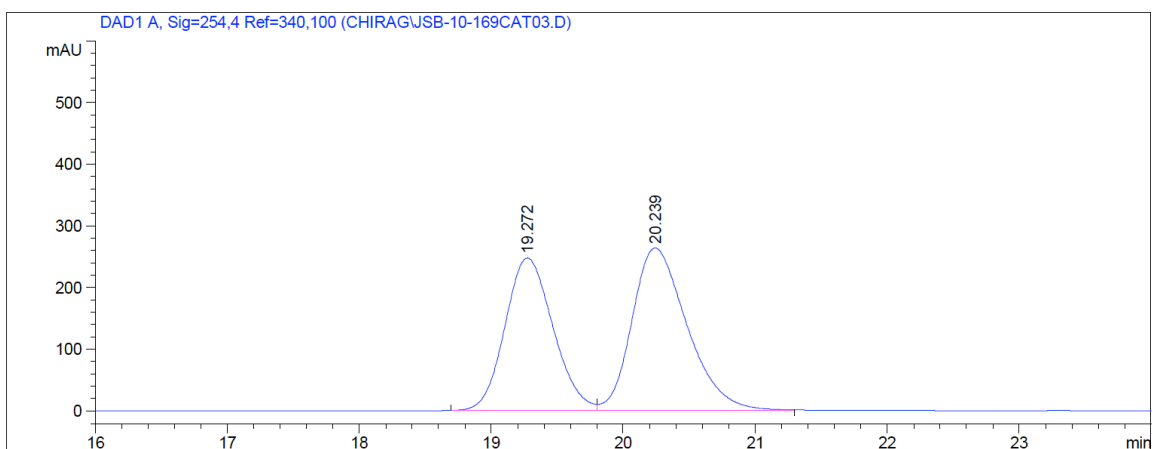

| Peak # | RetTime [min] | Sig | Type | Area [mAU*s] | Height [mAU] | Area %  |
|--------|---------------|-----|------|--------------|--------------|---------|
| 1      | 19.272        | 1   | BV   | 6234.42676   | 246.89293    | 45.0987 |
| 2      | 20.239        | 1   | VB   | 7589.53662   | 262.84201    | 54.9013 |

Table 2, entry 1. Hexanes/iPrOH 97/3, 1 mL/min, 254 nm, AD-H.

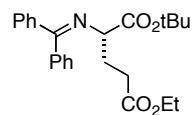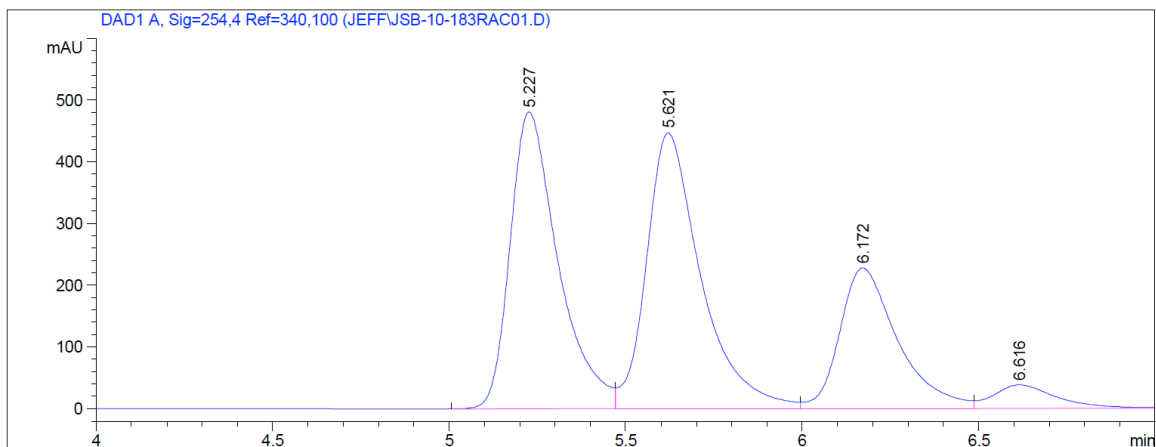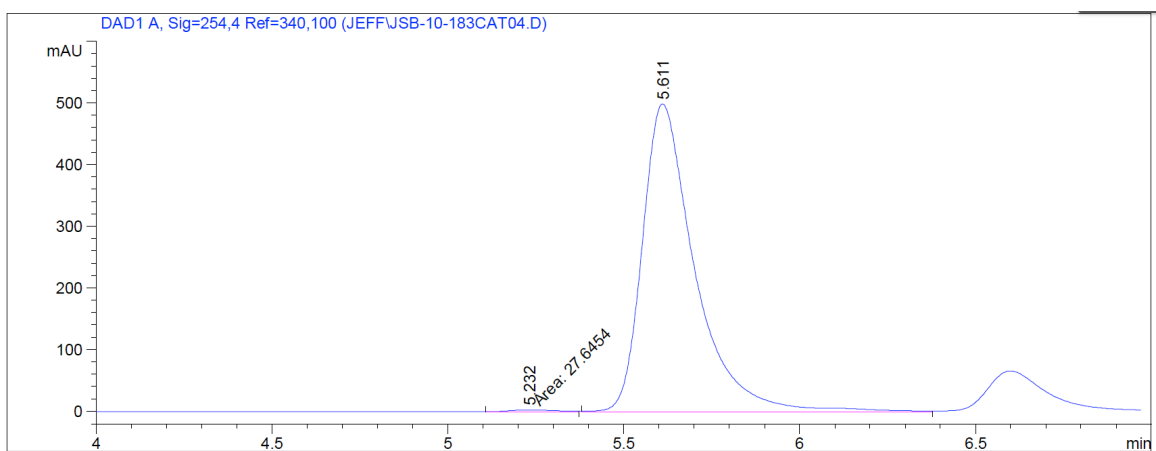

| Peak # | RetTime [min] | Sig | Type | Area [mAU*s] | Height [mAU] | Area %  |
|--------|---------------|-----|------|--------------|--------------|---------|
| 1      | 5.232         | 1   | MM T | 27.64539     | 3.09858      | 0.5306  |
| 2      | 5.611         | 1   | VV   | 5183.00488   | 499.06174    | 99.4694 |

Table 2, entry 3. Hexanes/iPrOH 98.5/1.5, 1 mL/min, 254 nm, OD-H.

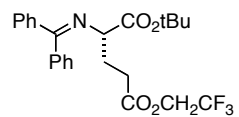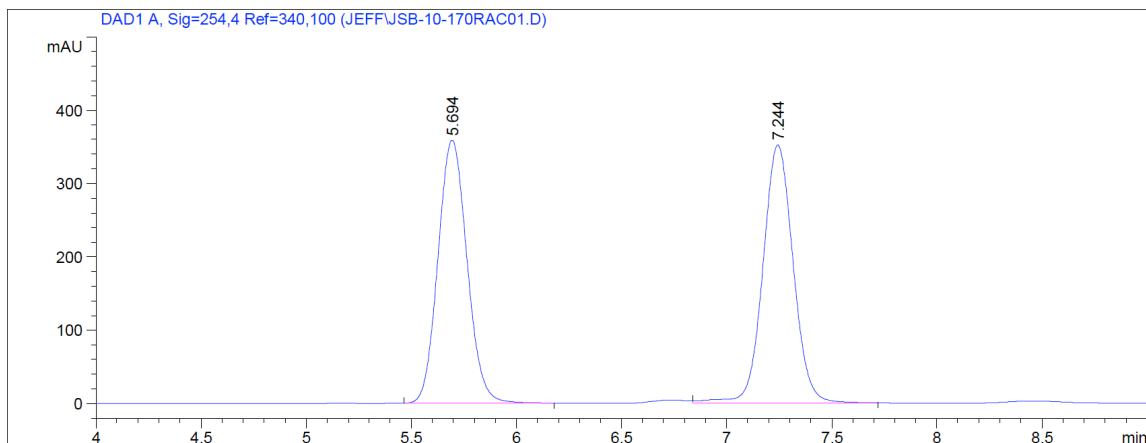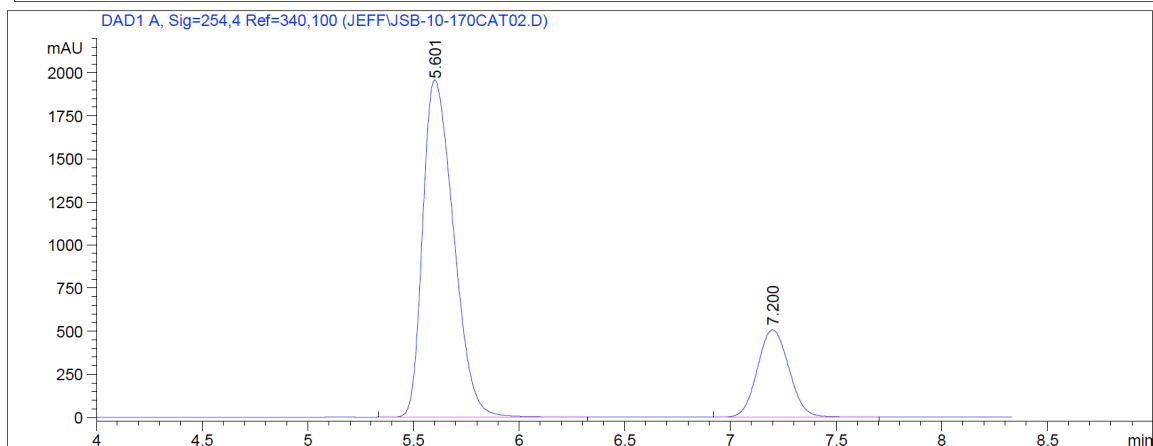

| Peak # | RetTime [min] | Sig | Type | Area [mAU*s] | Height [mAU] | Area %  |
|--------|---------------|-----|------|--------------|--------------|---------|
| 1      | 5.601         | 1   | BB   | 1.98404e4    | 1958.64746   | 79.0668 |
| 2      | 7.200         | 1   | BB   | 5252.81689   | 506.48874    | 20.9332 |

Table 3, entry 1. Hexanes/EtOH 98/2, 1 mL/min, 254 nm, AD-H.

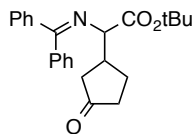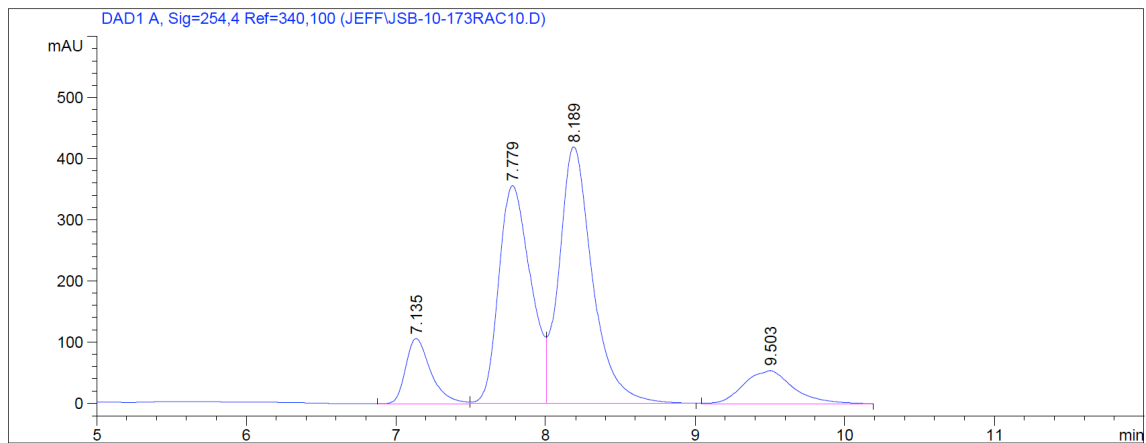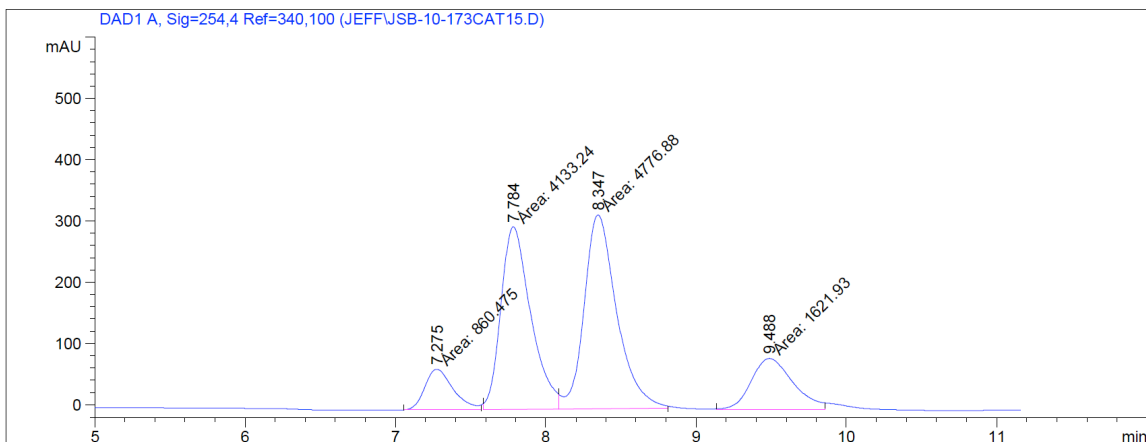

| Peak # | RetTime [min] | Sig | Type | Area [mAU*s] | Height [mAU] | Area %  |
|--------|---------------|-----|------|--------------|--------------|---------|
| 1      | 7.275         | 1   | MM T | 860.47479    | 65.83994     | 7.5530  |
| 2      | 7.784         | 1   | MF T | 4133.23828   | 297.99585    | 36.2803 |
| 3      | 8.347         | 1   | FM T | 4776.87842   | 315.63742    | 41.9299 |
| 4      | 9.488         | 1   | MM T | 1621.93311   | 83.56573     | 14.2368 |

Table 3, entry 2. Hexanes/iPrOH 96/4, 1 mL/min, 254 nm, AD-H.

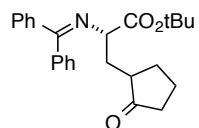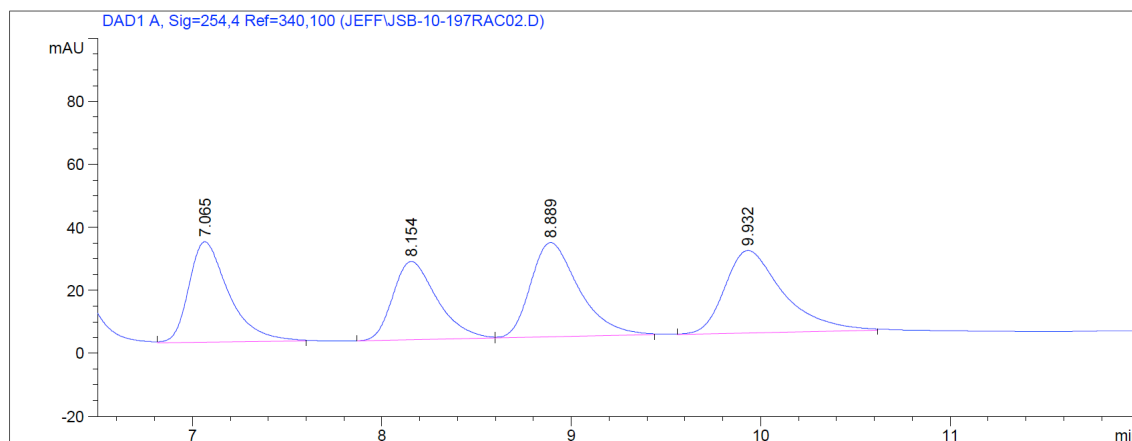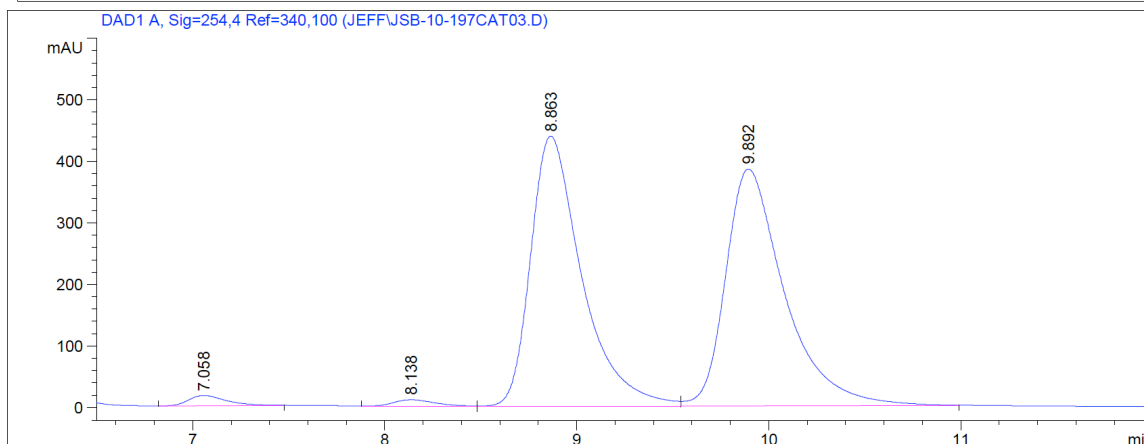

| Peak # | RetTime [min] | Sig | Type | Area [mAU*s] | Height [mAU] | Area %  |
|--------|---------------|-----|------|--------------|--------------|---------|
| 1      | 7.058         | 1   | BB   | 234.12263    | 16.82588     | 1.4056  |
| 2      | 8.138         | 1   | BV   | 145.43689    | 10.15079     | 0.8731  |
| 3      | 8.863         | 1   | VV   | 8092.19971   | 438.02695    | 48.5815 |
| 4      | 9.892         | 1   | VB   | 8185.20020   | 384.25171    | 49.1398 |



Table 6, entry 1: Hexanes/iPrOH 98/2, 1 mL/min, 254 nm, AD-H

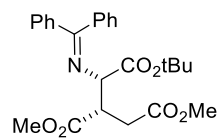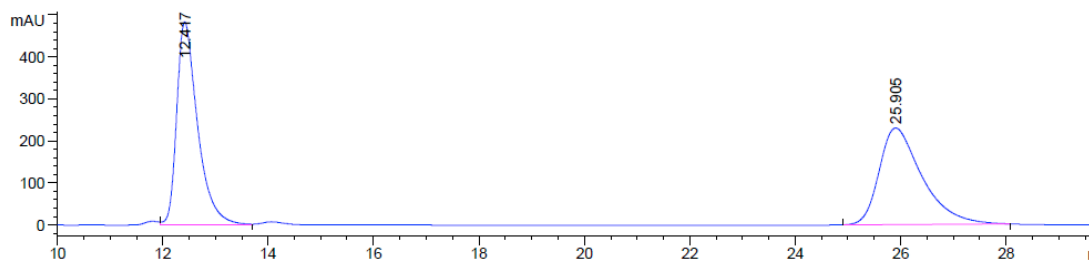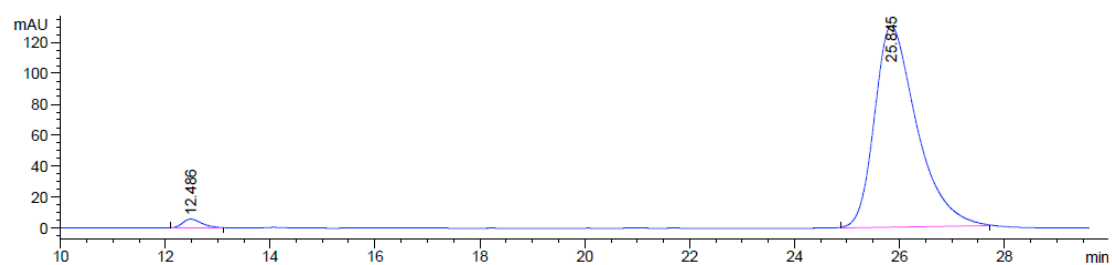

| Peak # | RetTime [min] | Type | Width [min] | Area [mAU*s] | Height [mAU] | Area %  |
|--------|---------------|------|-------------|--------------|--------------|---------|
| 1      | 12.486        | BB   | 0.3758      | 144.56180    | 5.64371      | 1.9442  |
| 2      | 25.845        | BB   | 0.8407      | 7291.11523   | 130.12016    | 98.0558 |

Table 6, entry 3: Hexanes/iPrOH 95/5, 1 mL/min, 254 nm, AD-H

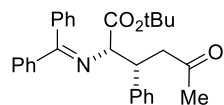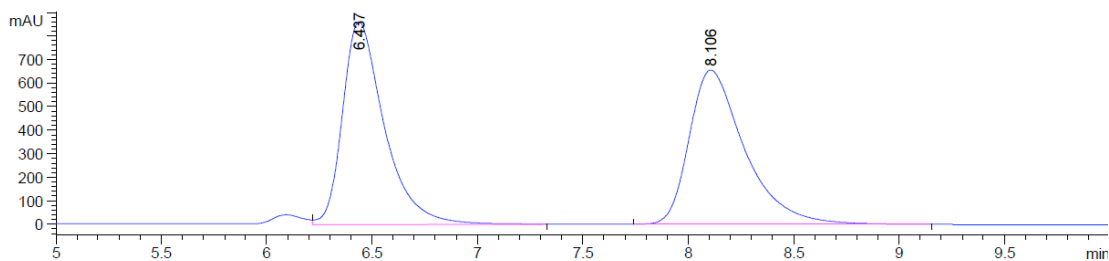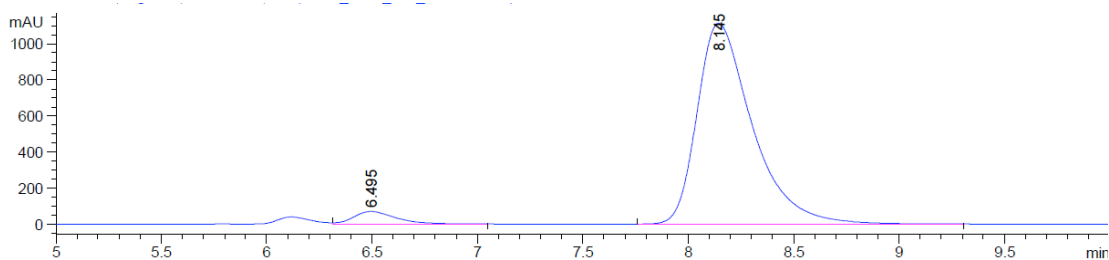

| Peak # | RetTime [min] | Type | Width [min] | Area [mAU*s] | Height [mAU] | Area %  |
|--------|---------------|------|-------------|--------------|--------------|---------|
| 1      | 6.495         | VB   | 0.2097      | 973.36182    | 69.81744     | 4.5746  |
| 2      | 8.145         | BB   | 0.2747      | 2.03041e4    | 1113.64990   | 95.4254 |

Table 6 entry 4: Hexanes/iPrOH 95/5, 1 mL/min, 254 nm, AD-H

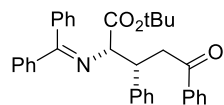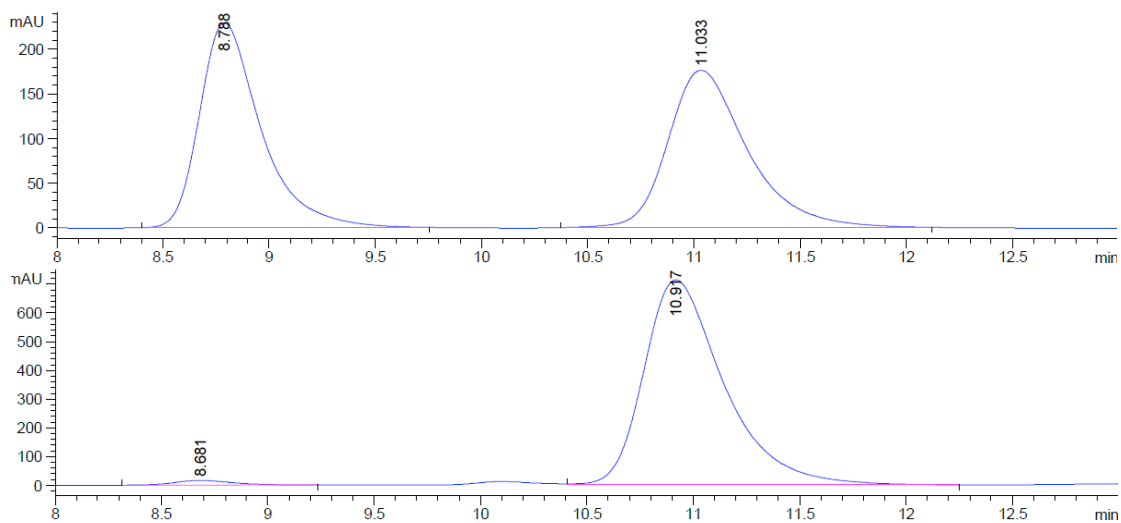

| Peak # | RetTime [min] | Type | Width [min] | Area [mAU*s] | Height [mAU] | Area %  |
|--------|---------------|------|-------------|--------------|--------------|---------|
| 1      | 8.681         | BB   | 0.3025      | 319.17154    | 15.94729     | 1.6749  |
| 2      | 10.917        | VB   | 0.3952      | 1.87366e4    | 713.91718    | 98.3251 |

Table 6, entry 5: Hexanes/iPrOH 95/5, 1 mL/min, 254 nm, AD-H

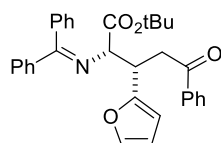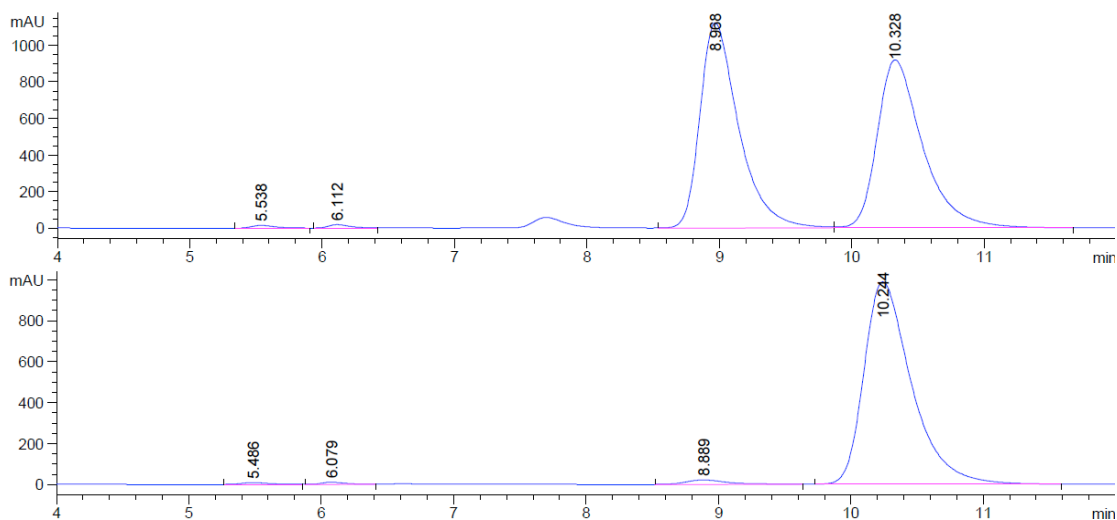

| Peak # | RetTime [min] | Type | Width [min] | Area [mAU*s] | Height [mAU] | Area %  |
|--------|---------------|------|-------------|--------------|--------------|---------|
| 1      | 3.109         | BB   | 0.1299      | 115.94562    | 13.02428     | 0.4532  |
| 2      | 5.486         | BB   | 0.2140      | 122.80331    | 8.84298      | 0.4800  |
| 3      | 6.079         | BB   | 0.1869      | 128.54597    | 10.49434     | 0.5024  |
| 4      | 8.889         | BB   | 0.3304      | 479.36398    | 21.81064     | 1.8736  |
| 5      | 10.244        | BB   | 0.3777      | 2.47386e4    | 989.43939    | 96.6908 |

Table 6, entry 6: Hexanes/iPrOH 95/5, 1 mL/min, 254 nm, AD-H

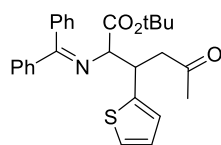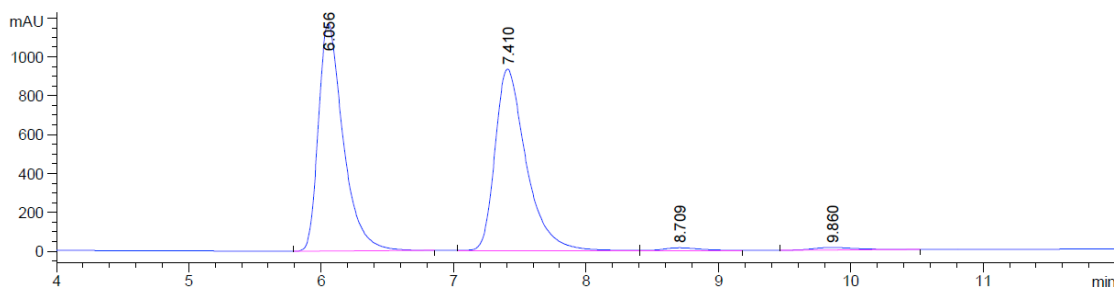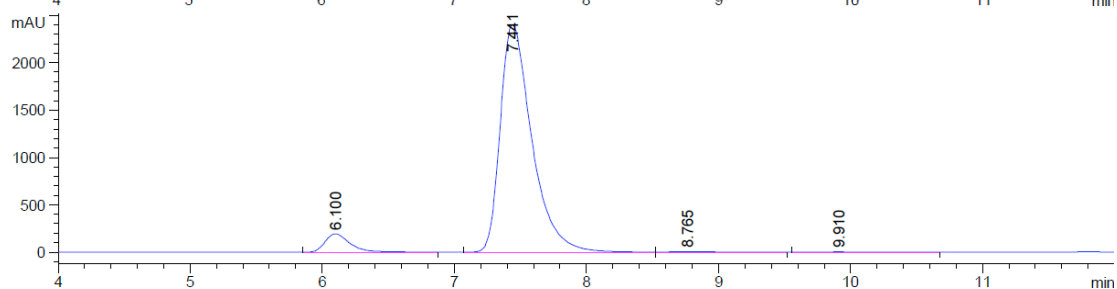

| Peak # | RetTime [min] | Type | Width [min] | Area [mAU*s] | Height [mAU] | Area %  |
|--------|---------------|------|-------------|--------------|--------------|---------|
| 1      | 6.100         | BB   | 0.2017      | 2606.30786   | 195.26425    | 6.0833  |
| 2      | 7.441         | BB   | 0.2503      | 3.99973e4    | 2401.12329   | 93.3561 |
| 3      | 8.765         | BB   | 0.3759      | 157.62022    | 6.13147      | 0.3679  |
| 4      | 9.910         | BB   | 0.3574      | 82.58051     | 3.42343      | 0.1927  |

Table 6, entry 7. Hexanes/EtOH 97/3, 1 mL/min, 254 nm, OD-H (using catalyst 1)

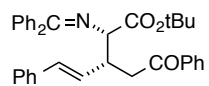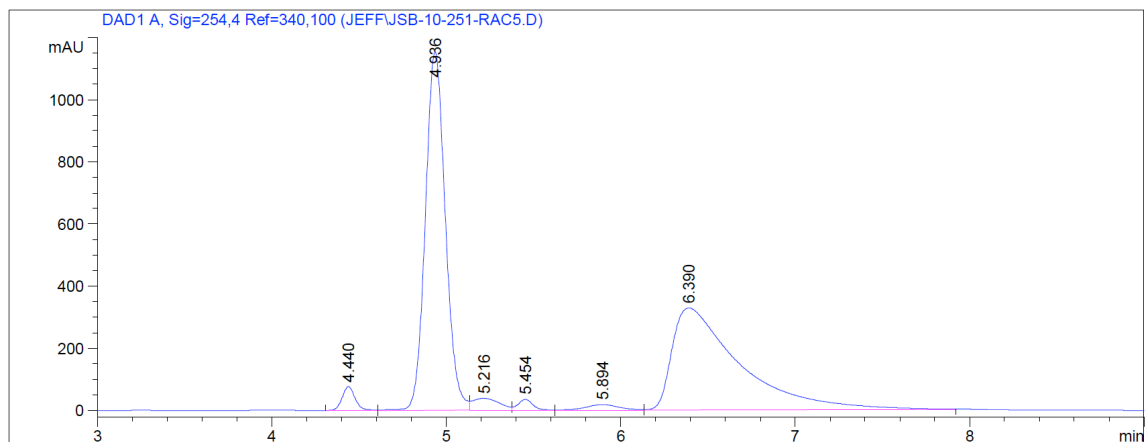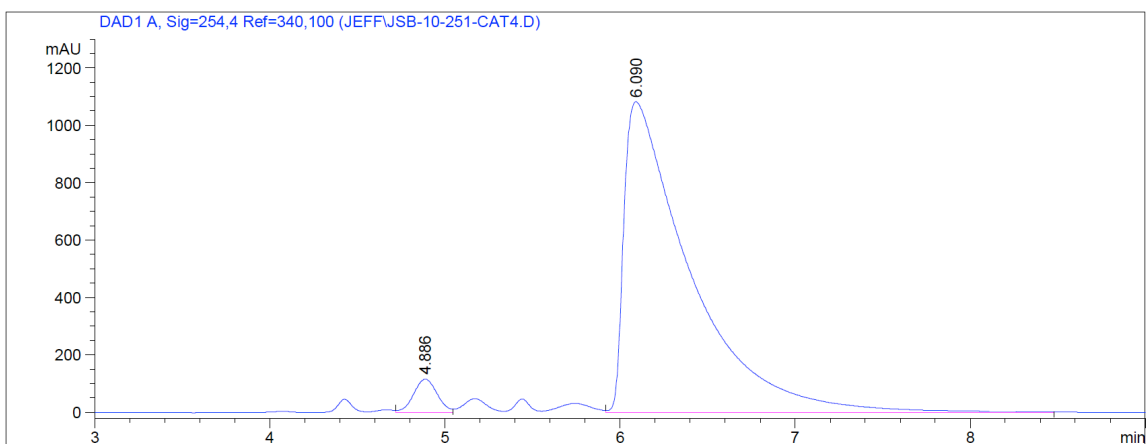

| Peak # | RetTime [min] | Sig | Type | Area [mAU*s] | Height [mAU] | Area %  |
|--------|---------------|-----|------|--------------|--------------|---------|
| 1      | 4.886         | 1   | VV   | 1093.96570   | 116.45546    | 3.7026  |
| 2      | 6.090         | 1   | VB   | 2.84522e4    | 1083.16150   | 96.2974 |

Table 6, entry 7. Hexanes/EtOH 97/3, 1 mL/min, 254 nm, OD-H (using catalyst **1**)

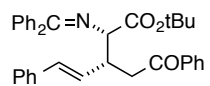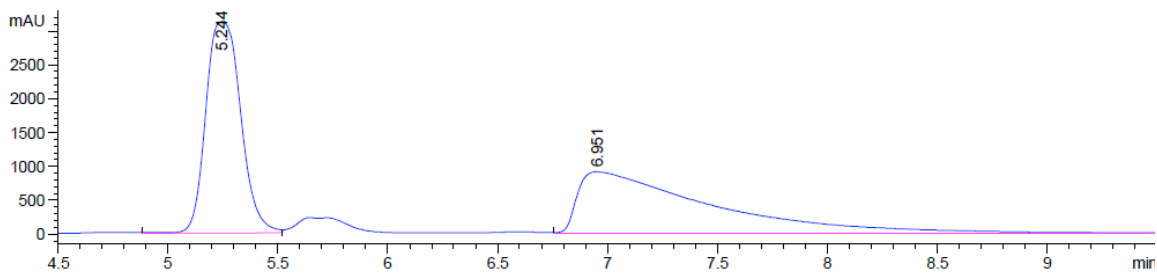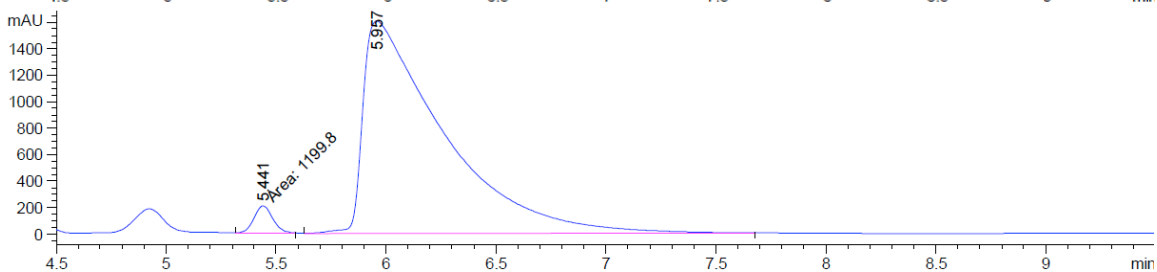

| Peak # | RetTime [min] | Type | Width [min] | Area [mAU*s] | Height [mAU] | Area %  |
|--------|---------------|------|-------------|--------------|--------------|---------|
| 1      | 5.441         | MM T | 0.0978      | 1199.80334   | 204.56404    | 2.8510  |
| 2      | 5.957         | VB   | 0.3492      | 4.08831e4    | 1604.62085   | 97.1490 |

Table 6 entry 8: Hexanes/iPrOH 98/2, 1 mL/min, 254 nm, AD-H

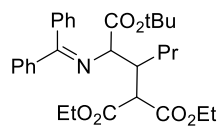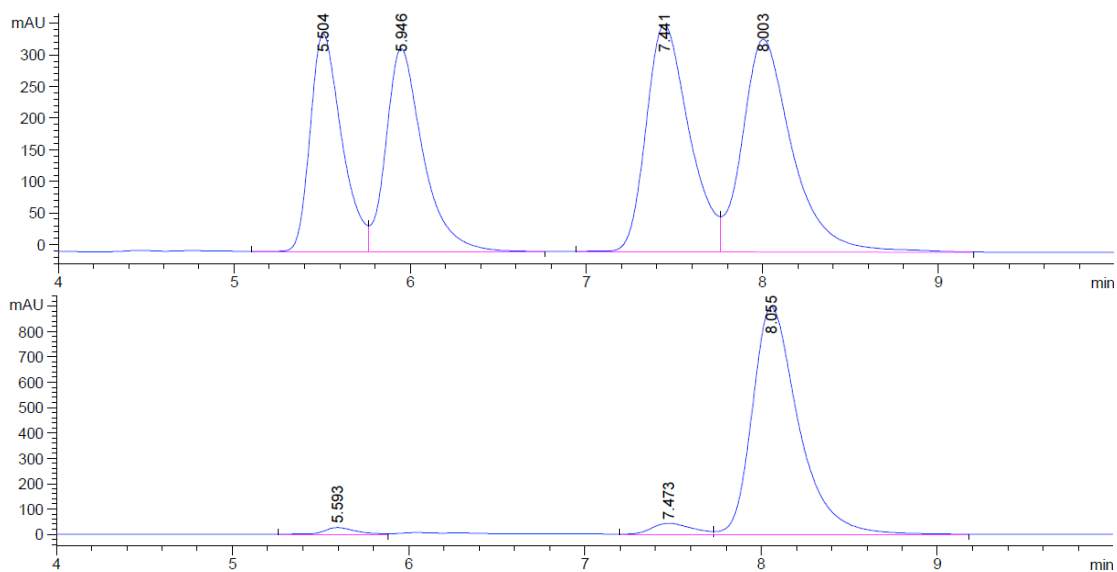

| Peak # | RetTime [min] | Type | Width [min] | Area [mAU*s] | Height [mAU] | Area %  |
|--------|---------------|------|-------------|--------------|--------------|---------|
| 1      | 5.593         | BV   | 0.1824      | 327.70663    | 26.84514     | 1.8945  |
| 2      | 7.473         | BV   | 0.2449      | 671.32690    | 42.35588     | 3.8810  |
| 3      | 8.055         | VB   | 0.2740      | 1.62990e4    | 896.84387    | 94.2246 |
